# Supplementary material for: Genome Sequence of Brucella abortus Vaccine Strain S19 Compared to Virulent Strains Yields Candidate Virulence Genes
Source: PLoS One. 2008 May 14;3(5):e2193. doi: 10.1371/journal.pone.0002193 (PMC2364660; doi:10.1371/journal.pone.0002193)
Supplement: Table S1 — Functional assignment of the ORFs of Brucella abortus Strain S19 using BLASTP searches against the protein datasets (0.54 MB XLS) [file pone.0002193.s001.xls]

## Sheet: Supplemental Table S1
Table S1. Functional assignment of the ORFs of Brucella abortus Strain S19 using BLASTP searches against the protein datasets
Gene ID0	Description	COG	GO Terms
BAbS19_I00010	chromosomal replication initiation protein	COG0593L	GO:0000166|GO:0000166|GO:0003677|GO:0003677|GO:0003688|GO:0003688|GO:0005524|GO:0005524|GO:0005524|GO:0006260|GO:0006270|GO:0006270|GO:0006275|GO:0006275|GO:0017111
BAbS19_I00020	DNA polymerase III, beta chain:Inorganic pyrophosphatase	COG0592L	GO:0003677|GO:0003887|GO:0003887|GO:0006260|GO:0008408|GO:0016740|GO:0016779
BAbS19_I00030	RecF protein:ATP/GTP-binding site motif A (P-loop):Aldehyde dehydrogenase:SMC protein, N-terminal:AAA ATPase	COG1195L	GO:0000166|GO:0000166|GO:0003677|GO:0003697|GO:0003697|GO:0005524|GO:0005524|GO:0005524|GO:0006260|GO:0006260|GO:0006281|GO:0006281|GO:0006281|GO:0006281|GO:0006974|GO:0006974|GO:0009432|GO:0009432|GO:0017111
BAbS19_I00040	NAD binding site:UBA/THIF-type NAD/FAD binding fold:Aromatic-ring hydroxylase	COG0476H	GO:0006118|GO:0008152|GO:0016491
BAbS19_I00050	Pyridine nucleotide-disulphide oxidoreductase, class I:D-isomer specific 2-hydroxyacid dehydrogenase, NAD binding domain	COG0110R	GO:0005554|GO:0008372
BAbS19_I00060	ABC transporter, ATP-binding protein	COG4172R	GO:0000166|GO:0000166|GO:0005524|GO:0005524|GO:0006857|GO:0015031|GO:0015198|GO:0016020|GO:0016020|GO:0016887|GO:0017111
BAbS19_I00070	Binding-protein-dependent transport systems inner membrane component	COG4239R	GO:0005215|GO:0006810|GO:0006810|GO:0016020|GO:0016021
BAbS19_I00080	Binding-protein-dependent transport systems inner membrane component	COG4174R	GO:0005215|GO:0006810|GO:0006810|GO:0016020|GO:0016021
BAbS19_I00090	OLIGOPEPTIDE-BINDING PROTEIN APPA PRECURSOR	COG4166E	GO:0000004|GO:0005554|GO:0008372
BAbS19_I00100	Bacterial extracellular solute-binding protein, family 5	COG4166E	GO:0000004|GO:0005554|GO:0008372
BAbS19_I00110	hypothetical protein	-	GO:0000004|GO:0005554|GO:0008372
BAbS19_I00120	LEUCINE-, ISOLEUCINE-, VALINE-, THREONINE-, AND ALANINE-BINDING PROTEIN PRECURSOR	COG0683E	GO:0005279|GO:0006865|GO:0030288
BAbS19_I00130	Enoyl-CoA hydratase/isomerase	COG1024I	GO:0004300|GO:0016829|GO:0016853
BAbS19_I00140	HMG-CoA lyase-like	COG0119E	GO:0003824|GO:0003824|GO:0004419|GO:0008152|GO:0016829
BAbS19_I00150	Biotin/lipoyl attachment:Biotin-requiring enzyme, attachment site:Carbamoyl-phosphate synthase L chain, ATP-binding:Carbamoyl...	COG4770I	GO:0003824|GO:0003824|GO:0003824|GO:0004485|GO:0005524|GO:0005524|GO:0005524|GO:0005524|GO:0005524|GO:0009374|GO:0016874|GO:0016874
BAbS19_I00160	Carboxyl transferase family	COG4799I	GO:0004485|GO:0016740|GO:0016874|GO:0016874|GO:0016874
BAbS19_I00170	Ivd, isovaleryl-CoA dehydrogenase	COG1960I	GO:0003995|GO:0003995|GO:0003995|GO:0006118|GO:0006118|GO:0006118|GO:0008152|GO:0016491|GO:0016627|GO:0050660
BAbS19_I00180	acetyl-coenzyme A synthetase	COG0365I	GO:0003824|GO:0008152|GO:0016874|GO:0030729
BAbS19_I00190	hypothetical protein	-	GO:0000004|GO:0005554|GO:0008372
BAbS19_I00200	hypothetical protein	COG1835I	GO:0000004|GO:0005554|GO:0008372
BAbS19_I00210	hypothetical protein	COG4530S	GO:0000004|GO:0005554|GO:0008372
BAbS19_I00220	ATP/GTP-binding site motif A (P-loop):EPSP synthase (3-phosphoshikimate 1-carboxyvinyltransferase):3-phosphoshikimate 1-carbo...	COG0128E	GO:0003866|GO:0003866|GO:0003866|GO:0008652|GO:0009073|GO:0016089|GO:0016089|GO:0016740
BAbS19_I00230	Cytidylate kinase	COG0283F	GO:0004127|GO:0004127|GO:0005524|GO:0005524|GO:0006139|GO:0016301|GO:0016740|GO:0019201
BAbS19_I00240	Ribosomal protein S1:RNA binding S1	COG0539J	GO:0003723|GO:0003723|GO:0003735|GO:0005840|GO:0006412
BAbS19_I00250	Conserved hypothetical protein 698	COG2855S	GO:0000004|GO:0005554|GO:0008372
BAbS19_I00260	Bacterial regulatory protein LysR, HTH motif:LysR substrate binding domain	-	GO:0003677|GO:0003700|GO:0006350|GO:0006355|GO:0006355
BAbS19_I00270	transglycosylase, putative	COG2951M	GO:0000004|GO:0005554|GO:0008372
BAbS19_I00280	recombination protein RecR	COG0353L	GO:0003676|GO:0003677|GO:0005622|GO:0006281|GO:0006281|GO:0006281|GO:0006304|GO:0006310|GO:0006310|GO:0006310|GO:0006974|GO:0008270|GO:0043565|GO:0046872
BAbS19_I00290	Conserved hypothetical protein 103	COG0718S	GO:0000004|GO:0005554|GO:0008372
BAbS19_I00300	Replication factor C conserved domain:ATP/GTP-binding site motif A (P-loop):AAA ATPase:AAA ATPase, central region	COG2812L	GO:0000166|GO:0000166|GO:0003887|GO:0003887|GO:0003887|GO:0005524|GO:0005524|GO:0006260|GO:0006260|GO:0009360|GO:0016020|GO:0016740|GO:0016779|GO:0017111
BAbS19_I00310	hit1 protein	COG0536R	GO:0000004|GO:0005554|GO:0008372
BAbS19_I00320	NUDIX hydrolase	COG2816L	GO:0016787|GO:0016787
BAbS19_I00330	Prephenate dehydratase:Amino acid-binding ACT	COG0077E	GO:0004664|GO:0004664|GO:0004664|GO:0009094|GO:0009094|GO:0016829
BAbS19_I00340	Acylneuraminate cytidylyltransferase:3-deoxy-D-manno-octulosonate cytidylyltransferase	COG1212M	GO:0005737|GO:0008690|GO:0008690|GO:0009103|GO:0016740|GO:0016779
BAbS19_I00350	Cytochrome c heme-binding site:Cytochrome c, class IA/ IB:Cytochrome c, class I:Cytochrome c, class IC	COG3474C	GO:0005506|GO:0005506|GO:0005506|GO:0005506|GO:0006118|GO:0006118|GO:0006118|GO:0006118|GO:0009055|GO:0009055|GO:0009055|GO:0009055|GO:0016021|GO:0020037|GO:0020037|GO:0020037|GO:0020037
BAbS19_I00360	molybdopterin biosynthesis enzyme	COG0303H	GO:0006777
BAbS19_I00370	Copper center Cu(A):Cytochrome o ubiquinol oxidase subunit II	COG1622C	GO:0004129|GO:0004129|GO:0005507|GO:0005507|GO:0006118|GO:0006118|GO:0006118|GO:0006118|GO:0009486|GO:0016020|GO:0016020|GO:0016021|GO:0016021|GO:0016491|GO:0016682
BAbS19_I00400	Cytochrome c oxidase, subunit III	COG1845C	GO:0004129|GO:0004129|GO:0006118|GO:0006118|GO:0016020|GO:0016020|GO:0016021|GO:0016491
BAbS19_I00410	Prokaryotic Cytochrome C oxidase subunit IV	COG3125C	GO:0000004|GO:0005554|GO:0008372
BAbS19_I00420	Hypothetical Membrane Spanning Protein	-	GO:0000004|GO:0005554|GO:0008372
BAbS19_I00430	Bacterial surface antigen (D15)	COG0729M	GO:0019867
BAbS19_I00440	GRAMICIDIN S BIOSYNTHESIS GRST PROTEIN	COG2911S	GO:0000004|GO:0005554|GO:0008372
BAbS19_I00450	ErfK/YbiS/YcfS/YnhG:Twin-arginine translocation pathway signal	COG1376S	GO:0000004|GO:0005554|GO:0008372
BAbS19_I00460	hypothetical protein	-	GO:0000004|GO:0005554|GO:0008372
BAbS19_I00470	Hypothetical cytosolic protein (cysteine-rich)	-	GO:0000004|GO:0005554|GO:0008372
BAbS19_I00480	hypothetical protein	-	GO:0000004|GO:0005554|GO:0008372
BAbS19_I00490	Protein of unknown function DUF461	COG4549S	GO:0000004|GO:0005554|GO:0008372
BAbS19_I00500	hypothetical protein	-	GO:0000004|GO:0005554|GO:0008372
BAbS19_I00510	Glyoxalase/Bleomycin resistance protein/dioxygenase domain:Glyoxalase I	COG0346E	GO:0004462|GO:0004462|GO:0005975|GO:0016702|GO:0016829
BAbS19_I00520	TonB-dependent receptor protein:Mrp family:ATP/GTP-binding site motif A (P-loop):Protein of unknown function DUF59	COG0489D	GO:0005524
BAbS19_I00530	Phosphoglucomutase/phosphomannomutase:Phosphogluc omutase/phosphomannomutase C terminal:Phosphoglucomutase/phosphomannomutase ...	COG0033G	GO:0004614|GO:0005975|GO:0016853|GO:0016868
BAbS19_I00540	Bacterial regulatory protein LysR, HTH motif:LysR substrate binding domain	-	GO:0003677|GO:0003700|GO:0006350|GO:0006355|GO:0006355
BAbS19_I00550	Esterase/lipase/thioesterase, active site	COG1073R	GO:0000004|GO:0005554|GO:0008372
BAbS19_I00560	Uridine kinase:ATP/GTP-binding site motif A (P-loop)	COG1072H	GO:0016301
BAbS19_I00570	Fumarylacetoacetate (FAA) hydrolase	COG0179Q	GO:0016787|GO:0047621
BAbS19_I00580	hypothetical protein	-	GO:0000004|GO:0005554|GO:0008372
BAbS19_I00590	hypothetical protein	-	GO:0000004|GO:0005554|GO:0008372
BAbS19_I00600	hypothetical protein	-	GO:0000004|GO:0005554|GO:0008372
BAbS19_I00610	SLT domain	COG0741M	GO:0000004|GO:0005554|GO:0008372
BAbS19_I00620	Hly-III related proteins	COG1272R	GO:0016021|GO:0016021|GO:0019835
BAbS19_I00630	Immunoglobulin/major histocompatibility complex:Phosphoesterase PHP, N-terminal:DNA polymerase III alpha subunit	COG0587L	GO:0003677|GO:0003887|GO:0003887|GO:0003887|GO:0003889|GO:0005737|GO:0006260|GO:0006260|GO:0006260|GO:0008408|GO:0016740|GO:0016779
BAbS19_I00640	hypothetical protein	COG0389L	GO:0000004|GO:0005554|GO:0008372
BAbS19_I00650	hypothetical protein	COG4544S	GO:0000004|GO:0005554|GO:0008372
BAbS19_I00660	outer membrane protein	COG5294S	GO:0000004|GO:0005554|GO:0008372
BAbS19_I00670	Argininosuccinate synthase	COG0137E	GO:0000166|GO:0004055|GO:0004055|GO:0004055|GO:0005524|GO:0005524|GO:0005524|GO:0006526|GO:0006526|GO:0006526|GO:0008652|GO:0016874
BAbS19_I00680	Lysine exporter protein (LYSE/YGGA)	COG1280E	GO:0000004|GO:0005554|GO:0008372
BAbS19_I00690	hypothetical protein	-	GO:0000004|GO:0005554|GO:0008372
BAbS19_I00700	Cytochrome c heme-binding site:Conserved hypothetical protein 48:Radical SAM	COG0820R	GO:0005506|GO:0005506|GO:0046872|GO:0051536|GO:0051539
BAbS19_I00710	hypothetical protein	-	GO:0000004|GO:0005554|GO:0008372
BAbS19_I00720	hypothetical protein	COG3339S	GO:0000004|GO:0005554|GO:0008372
BAbS19_I00730	Transcriptional coactivator/pterin dehydratase	COG2154H	GO:0008124|GO:0008124|GO:0016829
BAbS19_I00740	LOW MOLECULAR WEIGHT PHOSPHOTYROSINE PROTEIN PHOSPHATASE	COG0394T	GO:0004725|GO:0004725|GO:0006470
BAbS19_I00750	2`-5` RNA ligase, putative	COG1514J	GO:0008664|GO:0016070|GO:0016874
BAbS19_I00760	Lipolytic enzyme, G-D-S-L family	COG2755E	GO:0016787
BAbS19_I00770	ATP/GTP-binding site motif A (P-loop):ABC transporter:AAA ATPase:Sugar transporter superfamily	COG4181Q	GO:0000166|GO:0000166|GO:0005351|GO:0005524|GO:0005524|GO:0016020|GO:0016020|GO:0016887|GO:0017111
BAbS19_I00780	Protein of unknown function DUF214	COG3127Q	GO:0000004|GO:0005554|GO:0008372
BAbS19_I00790	hypothetical protein	COG0670R	GO:0000004|GO:0005554|GO:0008372
BAbS19_I00820	hypothetical protein	-	GO:0000004|GO:0005554|GO:0008372
BAbS19_I00830	hypothetical protein	COG5429S	GO:0000004|GO:0005554|GO:0008372
BAbS19_I00840	hypothetical protein	-	GO:0000004|GO:0005554|GO:0008372
BAbS19_I00850	Aconitate hydratase, C-terminal:Aconitate hydratase, N-terminal:Aconitate hydratase 1	COG1048C	GO:0003723|GO:0003994|GO:0003994|GO:0005506|GO:0005506|GO:0008152|GO:0016829|GO:0016829|GO:0016836
BAbS19_I00860	ATP/GTP-binding site motif A (P-loop):ABC transporter:AAA ATPase:Heme exporter protein CcmA	COG4133O	GO:0000166|GO:0000166|GO:0005215|GO:0005524|GO:0005524|GO:0006810|GO:0015439|GO:0016020|GO:0016020|GO:0016787|GO:0016887|GO:0017004|GO:0017004|GO:0017111|GO:0030288
BAbS19_I00870	SecY protein:Cytochrome c-type biogenesis protein CcmB	COG2386O	GO:0015232|GO:0015886|GO:0016020|GO:0017004
BAbS19_I00880	Cytochrome c assembly protein:Cytochrome c-type biogenesis protein CcmC	COG0755O	GO:0015232|GO:0015886|GO:0016020|GO:0017004
BAbS19_I00890	Heme exporter protein D (CcmD)	-	GO:0000004|GO:0005554|GO:0008372
BAbS19_I00900	Periplasmic protein thiol:disulfide oxidoreductase DsbE:Thioredoxin type domain:Thioredoxin domain 2	COG0525J	GO:0006118|GO:0009055|GO:0009055|GO:0015035|GO:0015036|GO:0017004|GO:0017004|GO:0030288|GO:0045454
BAbS19_I00910	Dihydroxy-acid and 6-phosphogluconate dehydratase:Dihydroxy-acid dehydratase	COG0128E	GO:0003824|GO:0004160|GO:0004160|GO:0008152|GO:0009082|GO:0016829
BAbS19_I00920	hypothetical protein	-	GO:0000004|GO:0005554|GO:0008372
BAbS19_I00930	hypothetical protein	-	GO:0000004|GO:0005554|GO:0008372
BAbS19_I00940	Response regulator receiver	COG0784T	GO:0000156|GO:0000160|GO:0000160|GO:0006350|GO:0006355|GO:0006355
BAbS19_I00950	transcriptional regulator, putative	COG1522K	GO:0000004|GO:0005554|GO:0008372
BAbS19_I00960	hypothetical protein	-	GO:0000004|GO:0005554|GO:0008372
BAbS19_I00970	Formate/nitrite transporter	-	GO:0000004|GO:0005554|GO:0008372
BAbS19_I00980	hypothetical protein	COG1434S	GO:0000004|GO:0005554|GO:0008372
BAbS19_I00990	Prokaryotic sulfate-/thiosulfate-binding protein:Bacterial extracellular solute-binding protein, family 1	COG1613P	GO:0008271|GO:0008272|GO:0008272|GO:0015419|GO:0030288|GO:0030288
BAbS19_I01000	Binding-protein-dependent transport systems inner membrane component	COG0555O	GO:0005215|GO:0006810|GO:0006810|GO:0006810|GO:0008272|GO:0009276|GO:0015116|GO:0015563|GO:0016020|GO:0016020|GO:0016021|GO:0016021
BAbS19_I01010	Binding-protein-dependent transport systems inner membrane component:NADH-plastoquinone oxidoreductase, chain 5	COG4208P	GO:0005215|GO:0006810|GO:0006810|GO:0006810|GO:0008272|GO:0009276|GO:0015116|GO:0015563|GO:0016020|GO:0016020|GO:0016021|GO:0016021
BAbS19_I01020	SULFATE TRANSPORT ATP-BINDING PROTEIN CYSA	COG1118P	GO:0000166|GO:0000166|GO:0005524|GO:0005524|GO:0006810|GO:0006810|GO:0008272|GO:0015419|GO:0016020|GO:0016020|GO:0016020|GO:0016787|GO:0016887|GO:0017111|GO:0032146|GO:0042626
BAbS19_I01030	cyclic beta 1-2 glucan synthetase	COG3459G	GO:0000004|GO:0005554|GO:0008372
BAbS19_I01040	Nicotinate phosphoribosyltransferase:Nicotinate phosphoribosyltransferase and related	COG1488H	GO:0004516|GO:0004516|GO:0004516|GO:0016740|GO:0016757|GO:0019357|GO:0019363
BAbS19_I01050	Phenazine biosynthesis PhzC/PhzF protein	COG0384R	GO:0003824|GO:0009058
BAbS19_I01060	SAM (and some other nucleotide) binding motif:Generic methyltransferase	COG0499H	GO:0008168|GO:0016740
BAbS19_I01070	Ribokinase:Carbohydrate kinase, PfkB	COG0524G	GO:0004747|GO:0006014|GO:0008865|GO:0016301|GO:0016740
BAbS19_I01080	Short-chain dehydrogenase/reductase SDR:Glucose/ribitol dehydrogenase	-	GO:0008152|GO:0008152|GO:0016491|GO:0016491|GO:0016491
BAbS19_I01090	Glycosyl transferase, family 51:Penicillin-binding protein, transpeptidase domain:ATP/GTP-binding site motif A (P-loop)	COG0744M	GO:0003824|GO:0008233|GO:0009252|GO:0009252|GO:0009274|GO:0016740|GO:0016763|GO:0046677
BAbS19_I01100	outer membrane protein, putative	COG3637M	GO:0000004|GO:0005554|GO:0008372
BAbS19_I01110	outer membrane protein, putative	COG3637M	GO:0000004|GO:0005554|GO:0008372
BAbS19_I01120	3'-5' exonuclease	COG0349J	GO:0003676|GO:0004518|GO:0004525|GO:0004527|GO:0005622|GO:0008408|GO:0016787
BAbS19_I01130	Peptidase M20/M25/M40	COG0624E	GO:0000004|GO:0005554|GO:0008372
BAbS19_I01140	5'3'-Exonuclease N-and I-domain:DNA-directed DNA polymerase:DNA polymerase, family A:5'-3' exonuclease:3'-5' exonuclease:Hel...	COG0749L	GO:0003676|GO:0003677|GO:0003677|GO:0003677|GO:0003677|GO:0003887|GO:0003887|GO:0003887|GO:0003887|GO:0004518|GO:0004527|GO:0005622|GO:0005622|GO:0006260|GO:0006260|GO:0006260|GO:0006281|GO:0006974|GO:0008408|GO:0008409|GO:0016740|GO:0016779|GO:0016787|GO:0043565
BAbS19_I01150	Lipocalin-related protein and Bos/Can/Equ allergen:ATP-dependent helicase, DEAD-box:DEAD/DEAH box helicase:Helicase, C-termin...	COG0511I	GO:0000166|GO:0003676|GO:0003676|GO:0004386|GO:0004386|GO:0005524|GO:0005524|GO:0005524|GO:0008026|GO:0016787
BAbS19_I01160	DNA gyrase subunit B	COG0187L	GO:0000166|GO:0003677|GO:0003677|GO:0003677|GO:0003677|GO:0003677|GO:0003916|GO:0003918|GO:0003918|GO:0003918|GO:0003918|GO:0003918|GO:0003918|GO:0005524|GO:0005524|GO:0005524|GO:0005524|GO:0005524|GO:0005524|GO:0005524|GO:0005694|GO:0005694|GO:0005694|GO:0005694|GO:0005694|GO:0006265|GO:0006265|GO:0006265|GO:0006265|GO:0006265|GO:0016853
BAbS19_I01170	hypothetical protein	-	GO:0000004|GO:0005554|GO:0008372
BAbS19_I01180	S-FORMYLGLUTATHIONE HYDROLASE	COG0627R	GO:0016787|GO:0018738
BAbS19_I01210	GCN5-related N-acetyltransferase	COG2153R	GO:0008080|GO:0008152|GO:0016740
BAbS19_I01220	NAD binding site:Zinc-containing alcohol dehydrogenase superfamily:Zinc-containing alcohol dehydrogenase	COG1062C	GO:0004022|GO:0008270|GO:0008270|GO:0008270|GO:0016491|GO:0016491|GO:0016491|GO:0046872
BAbS19_I01230	Protein of unknown function DUF156	COG1937S	GO:0000004|GO:0005554|GO:0008372
BAbS19_I01240	ATP-DEPENDENT HELICASE HRPB	COG1643L	GO:0000166|GO:0003676|GO:0004386|GO:0004386|GO:0005524|GO:0005524|GO:0016787
BAbS19_I01250	ATP-binding region, ATPase-like:Histidine kinase A, N-terminal:Bacterial sensor protein, C-terminal:Histidine kinase	-	GO:0000155|GO:0004673|GO:0005524|GO:0005524|GO:0007165|GO:0016020|GO:0016301|GO:0016310|GO:0016740|GO:0016772|GO:0018106
BAbS19_I01260	TRANSPOSASE	-	GO:0000004|GO:0005554|GO:0008372
BAbS19_I01270	Transposase, IS4	-	GO:0000004|GO:0005554|GO:0008372
BAbS19_I01280	Response regulator receiver:Helix-turn-helix, Fis-type	COG4566T	GO:0000156|GO:0000160|GO:0000160|GO:0003677|GO:0003677|GO:0006350|GO:0006355|GO:0006355|GO:0009605|GO:0030528|GO:0045449
BAbS19_I01290	hypothetical protein	COG5321S	GO:0000004|GO:0005554|GO:0008372
BAbS19_I01300	ErfK/YbiS/YcfS/YnhG	COG1376S	GO:0000004|GO:0005554|GO:0008372
BAbS19_I01310	Nitrogen-fixing NifU, C-terminal	COG0694O	GO:0000004|GO:0005554|GO:0008372
BAbS19_I01320	Hypothetical Cytosolic Protein	COG0589T	GO:0000004|GO:0005554|GO:0008372
BAbS19_I01330	Aminoacyl-tRNA synthetase, class I:Aminoacyl-tRNA synthetase, class Ib:Tryptophanyl-tRNA synthetase, class Ib	COG0180J	GO:0000166|GO:0004812|GO:0004812|GO:0004830|GO:0004830|GO:0005524|GO:0005524|GO:0005524|GO:0006412|GO:0006418|GO:0006436|GO:0016874
BAbS19_I01340	Virulence factor MVIN-like	COG0728R	GO:0009405|GO:0016021
BAbS19_I01350	Amino acid-binding ACT:Metal dependent phosphohydrolase, HD region:Metal-dependent phosphohydrolase, HD region	COG2844O	GO:0003824|GO:0006807|GO:0008773|GO:0008773|GO:0008773|GO:0016740|GO:0016779
BAbS19_I01360	NADP-DEPENDENT MALIC ENZYME	COG0280C	GO:0004473|GO:0008415
BAbS19_I01370	NADP-DEPENDENT MALIC ENZYME	COG0281C	GO:0004470|GO:0004473|GO:0006108
BAbS19_I01380	DNA mismatch repair protein MutS, C-terminal:Aldo/keto reductase:ATP/GTP-binding site motif A (P-loop):MutS 1 protein:DNA mis...	COG0249L	GO:0003677|GO:0005524|GO:0005524|GO:0005524|GO:0006298|GO:0006298|GO:0006298|GO:0030983|GO:0030983|GO:0030983
BAbS19_I01390	hypothetical protein	COG3176R	GO:0000004|GO:0005554|GO:0008372
BAbS19_I01400	Signal peptidase II, family A8	COG0596R	GO:0004190|GO:0006508|GO:0009005|GO:0016020|GO:0016787
BAbS19_I01410	tRNA/rRNA methyltransferase (SpoU)	COG0566J	GO:0003723|GO:0006396|GO:0008168|GO:0008173|GO:0016740
BAbS19_I01440	hypothetical protein	-	GO:0000004|GO:0005554|GO:0008372
BAbS19_I01450	Histone-like bacterial DNA-binding protein:Integration host factor, beta subunit	COG0776L	GO:0003677|GO:0003677|GO:0003677|GO:0003677|GO:0005694
BAbS19_I01460	Clp protease:Peptidase U7:Signal peptide peptidase, SppA 36 kDa type	COG0614P	GO:0006508|GO:0006508|GO:0006508|GO:0008233|GO:0008233|GO:0008233|GO:0008462|GO:0016787
BAbS19_I01470	hypothetical protein	COG5375S	GO:0000004|GO:0005554|GO:0008372
BAbS19_I01480	OstA-like protein	COG1934S	GO:0000004|GO:0005554|GO:0008372
BAbS19_I01490	ATP/GTP-binding site motif A (P-loop):ABC transporter:AAA ATPase	COG1137R	GO:0000166|GO:0000166|GO:0005524|GO:0005524|GO:0016020|GO:0016020|GO:0016887|GO:0017111
BAbS19_I01500	Sigma-54 factor family:Sigma-54 factor, core binding domain:Sigma-54, DNA-binding domain	COG1508K	GO:0003677|GO:0003677|GO:0003700|GO:0003899|GO:0006352|GO:0006355|GO:0016987
BAbS19_I01510	Sigma 54 modulation protein/ribosomal protein S30EA	COG1544J	GO:0000004|GO:0005554|GO:0008372
BAbS19_I01520	Phosphoenolpyruvate-dependent sugar phosphotransferase system, EIIA 2:PTS IIA-like nitrogen-regulatory protein PtsN	COG1761K	GO:0005351|GO:0006810|GO:0008982|GO:0008982|GO:0009401|GO:0009401|GO:0016740
BAbS19_I01530	hypothetical protein	COG5568S	GO:0000004|GO:0005554|GO:0008372
BAbS19_I01540	Heat shock protein Hsp20	COG0071O	GO:0006457|GO:0006986
BAbS19_I01550	hypothetical protein	-	GO:0000004|GO:0005554|GO:0008372
BAbS19_I01560	hypothetical protein	COG5488S	GO:0000004|GO:0005554|GO:0008372
BAbS19_I01570	Helix-hairpin-helix motif:HhH-GPD:Helix-hairpin-helix DNA-binding, class 1:Endonuclease III, HhH:Endonuclease III/Nth	COG0177L	GO:0003677|GO:0003906|GO:0003906|GO:0004519|GO:0004519|GO:0004519|GO:0005506|GO:0005622|GO:0005622|GO:0006281|GO:0006284|GO:0006284|GO:0016829|GO:0043565
BAbS19_I01580	Sodium:dicarboxylate symporter:Protein of unknown function DUF540	COG2981E	GO:0004088|GO:0016874
BAbS19_I01590	Ribokinase:Carbohydrate kinase, PfkB	COG0524G	GO:0016301
BAbS19_I01600	hypothetical protein	COG2860S	GO:0000004|GO:0005554|GO:0008372
BAbS19_I01610	GrpE protein	COG0576O	GO:0000774|GO:0005515|GO:0005515|GO:0006457|GO:0006457|GO:0006457|GO:0006457|GO:0006986|GO:0042803|GO:0051087
BAbS19_I01620	Negative regulator of class I heat shock protein	COG1420K	GO:0006355|GO:0006457|GO:0006986
BAbS19_I01630	3' exoribonuclease:Ribonuclease PH	COG0689J	GO:0000049|GO:0000175|GO:0003723|GO:0004549|GO:0006396|GO:0008033|GO:0009022|GO:0016740|GO:0016779
BAbS19_I01640	LACTOYLGLUTATHIONE LYASE, PUTATIVE	COG0346E	GO:0000004|GO:0005554|GO:0008372
BAbS19_I01650	LACTOYLGLUTATHIONE LYASE, PUTATIVE	COG0346E	GO:0000004|GO:0005554|GO:0008372
BAbS19_I01660	Ham1-like protein	COG0127F	GO:0016787|GO:0016787
BAbS19_I01670	coproporphyrinogen III oxidase	COG0635H	GO:0004109|GO:0005506|GO:0005506|GO:0005507|GO:0005737|GO:0006779|GO:0006779|GO:0016491|GO:0046872|GO:0051536|GO:0051539
BAbS19_I01680	tetrapyrrole methylase family protein	COG0313R	GO:0008152|GO:0008168|GO:0008168
BAbS19_I01690	hypothetical protein	COG0792L	GO:0000004|GO:0005554|GO:0008372
BAbS19_I01700	Uroporphyrin-III C/tetrapyrrole (Corrin/Porphyrin) methyltransferase:Pyrokinin:Uroporphiryn-III C-methyltransferase:Uroporphy...	COG0007H	GO:0004851|GO:0004851|GO:0006779|GO:0006779|GO:0006779|GO:0008152|GO:0008168|GO:0008168|GO:0008168|GO:0008168|GO:0009236|GO:0016740|GO:0043115|GO:0051266|GO:0051287
BAbS19_I01710	hypothetical protein	-	GO:0000004|GO:0005554|GO:0008372
BAbS19_I01720	sulfite reductase (NADPH) hemoprotein beta-component	COG0155P	GO:0004783|GO:0005506|GO:0006118|GO:0016491|GO:0016491|GO:0016664|GO:0020037|GO:0042128
BAbS19_I01730	Phosphoadenosine phosphosulfate reductase:Phosphoadenosine phosphosulfate reductase CysH-type	COG0174E	GO:0004604|GO:0004604|GO:0016491|GO:0019379
BAbS19_I01740	hypothetical protein	COG3749S	GO:0000004|GO:0005554|GO:0008372
BAbS19_I01750	hypothetical protein	-	GO:0000004|GO:0005554|GO:0008372
BAbS19_I01760	Methylated-DNA-[protein]-cysteine S-methyltransferase	COG0350L	GO:0003908|GO:0008168|GO:0016740
BAbS19_I01770	hypothetical protein	-	GO:0000004|GO:0005554|GO:0008372
BAbS19_I01780	hypothetical protein	-	GO:0000004|GO:0005554|GO:0008372
BAbS19_I01790	Dihydropteroate synthase, DHPS:Homocysteine S-methyltransferase:Cobalamin-dependent methionine synthase, B12-binding:Vitamin ...	COG1410E	GO:0004156|GO:0005622|GO:0008168|GO:0008705|GO:0008705|GO:0008705|GO:0008705|GO:0008898|GO:0009086|GO:0009086|GO:0009086|GO:0009396|GO:0016740|GO:0031419|GO:0050897|GO:0050897
BAbS19_I01800	TRANSCRIPTIONAL ACTIVATOR, LUXR FAMILY	COG2771K	GO:0003677|GO:0003700|GO:0005622|GO:0006350|GO:0006355|GO:0006355|GO:0009372|GO:0043565
BAbS19_I01810	Aminotransferase class-III:Maltose binding protein	COG0161H	GO:0008483|GO:0008483|GO:0016740|GO:0030170
BAbS19_I01820	sulfate adenylyltransferase subunit 2	COG0174E	GO:0004781|GO:0004781|GO:0019421
BAbS19_I01830	Shikimate kinase:Uridine kinase:Elongation factor, GTP-binding:ATP/GTP-binding site motif A (P-loop):Adenylylsulfate kinase:E...	COG2895P	GO:0000103|GO:0003746|GO:0003924|GO:0004781|GO:0005524|GO:0005525|GO:0016301|GO:0016301|GO:0016740|GO:0016772|GO:0016772|GO:0016779
BAbS19_I01840	CYSQ PROTEIN	COG1218P	GO:0004437
BAbS19_I01850	Bacterial regulatory proteins, AsnC family:Cyclic nucleotide-binding domain:Bacterial regulatory protein, Crp family	COG0664T	GO:0003677|GO:0003677|GO:0006350|GO:0006355|GO:0045449
BAbS19_I01860	Bacterial regulatory protein, LuxR family	COG2195E	GO:0003677|GO:0003700|GO:0005622|GO:0006350|GO:0006355|GO:0006355|GO:0043565
BAbS19_I01870	Bacterial regulatory protein, DeoR family	COG1348P	GO:0003677|GO:0003700|GO:0005622|GO:0006350|GO:0006355|GO:0006355
BAbS19_I01880	FAD-dependent glycerol-3-phosphate dehydrogenase:FAD dependent oxidoreductase	COG0578C	GO:0004368|GO:0004368|GO:0006072|GO:0009331|GO:0016491
BAbS19_I01890	Helix-turn-helix, Fis-type	COG3281G	GO:0000004|GO:0005554|GO:0008372
BAbS19_I01920	Zinc-containing alcohol dehydrogenase superfamily:Zinc-containing alcohol dehydrogenase	COG1064R	GO:0004022|GO:0008270|GO:0008270|GO:0008270|GO:0016491|GO:0016491|GO:0016491|GO:0046872
BAbS19_I01930	hypothetical protein	COG3564S	GO:0000004|GO:0005554|GO:0008372
BAbS19_I01940	Bacterial regulatory protein LacI, HTH motif:Periplasmic binding protein/LacI transcriptional regulator	COG1609K	GO:0003700|GO:0005622|GO:0006355
BAbS19_I01980	Aldehyde dehydrogenase	COG1012C	GO:0004029|GO:0008152|GO:0016491|GO:0016491|GO:0016491
BAbS19_I01990	RNA-binding region RNP-1 (RNA recognition motif):Binding-protein-dependent transport systems inner membrane component	COG0600P	GO:0005215|GO:0006810|GO:0006810|GO:0016020|GO:0016021
BAbS19_I02000	TENA/THI-4 protein	COG0819K	GO:0000004|GO:0005554|GO:0008372
BAbS19_I02010	ABC transporter substrate-binding protein KO: K02051 sulfonate/nitrate transport system substrate-binding protein	COG0715P	GO:0000004|GO:0005554|GO:0008372
BAbS19_I02020	Thiamine monophosphate synthase	COG0352H	GO:0000287|GO:0003824|GO:0004789|GO:0004789|GO:0004789|GO:0008152|GO:0009228|GO:0009228|GO:0016740
BAbS19_I02030	FMN/related compound-binding core	COG2022H	GO:0003824|GO:0008152|GO:0009228|GO:0009228
BAbS19_I02040	ThiamineS	COG2104H	GO:0000004|GO:0005554|GO:0008372
BAbS19_I02050	Mercuric reductase:Flavin-containing monooxygenase FMO:Pyridine nucleotide-disulphide oxidoreductase, class I:TrkA potassium ...	COG0665E	GO:0004497|GO:0006118|GO:0016491|GO:0016491|GO:0050660
BAbS19_I02060	Eukaryotic/viral aspartic protease, active site:Ribokinase:Phosphomethylpyrimidine kinase	COG0351H	GO:0008233|GO:0008972|GO:0008972|GO:0009228|GO:0016301|GO:0016740
BAbS19_I02070	PAS domain:GGDEF:PAS-associated C-terminal domain:PAC motif:EAL domain	COG2200T	GO:0000155|GO:0000160|GO:0004871|GO:0006355|GO:0007165|GO:0007165
BAbS19_I02080	copper-translocating P-type ATPase	COG2217P	GO:0004008|GO:0004008|GO:0005524|GO:0005524|GO:0005524|GO:0006810|GO:0006825|GO:0015662|GO:0015662|GO:0016020|GO:0016020|GO:0016020|GO:0016021|GO:0030001|GO:0030001|GO:0030001|GO:0046872|GO:0046872|GO:0046873
BAbS19_I02090	Bacterial regulatory protein, MerR family:ATP/GTP-binding site motif A (P-loop)	COG0789K	GO:0003677|GO:0003700|GO:0005507|GO:0005622|GO:0006355|GO:0016563|GO:0045941
BAbS19_I02100	Binding-protein-dependent transport systems inner membrane component:Basic helix-loop-helix dimerization domain bHLH:Pollen a...	COG1174E	GO:0005215|GO:0006810|GO:0006810|GO:0016020|GO:0016021
BAbS19_I02110	ATP/GTP-binding site motif A (P-loop):ABC transporter:AAA ATPase	COG1125E	GO:0000166|GO:0000166|GO:0005524|GO:0005524|GO:0016020|GO:0016020|GO:0016887|GO:0017111
BAbS19_I02120	Binding-protein-dependent transport systems inner membrane component	COG1174E	GO:0005215|GO:0006810|GO:0006810|GO:0016020|GO:0016021
BAbS19_I02130	Substrate-binding region of ABC-type glycine betaine transport system	COG1732M	GO:0000004|GO:0005554|GO:0008372
BAbS19_I02140	hypothetical protein	COG5514S	GO:0000004|GO:0005554|GO:0008372
BAbS19_I02150	ATP/GTP-binding site motif A (P-loop):TrkA potassium uptake protein:Glu/Leu/Phe/Val dehydrogenase:Glu/Leu/Phe/Val dehydrogena...	COG0334E	GO:0004354|GO:0006520|GO:0016491|GO:0016491
BAbS19_I02160	Pyridine nucleotide-disulphide oxidoreductase, class-II:FAD dependent oxidoreductase:Sarcosine oxidase, beta subunit, heterot...	COG0665E	GO:0008115|GO:0008115|GO:0016491|GO:0046653
BAbS19_I02170	Sarcosine oxidase, delta subunit, heterotetrameric	COG4311E	GO:0008115|GO:0008115|GO:0016491|GO:0046653
BAbS19_I02200	Sarcosine oxidase, gamma subunit	COG4583E	GO:0008115|GO:0016491
BAbS19_I02210	Amidohydrolase 2	COG3618R	GO:0016740|GO:0016757|GO:0016787
BAbS19_I02220	Bacterial regulatory protein, MarR family:Bacterial regulatory proteins, IclR family	COG1414K	GO:0003677|GO:0003677|GO:0006350|GO:0006355|GO:0006355
BAbS19_I02230	Bacterial extracellular solute-binding protein, family 1	COG1653G	GO:0000004|GO:0005554|GO:0008372
BAbS19_I02240	Binding-protein-dependent transport systems inner membrane component	COG1175G	GO:0005215|GO:0006810|GO:0006810|GO:0016020|GO:0016021
BAbS19_I02250	Binding-protein-dependent transport systems inner membrane component	COG0395G	GO:0005215|GO:0006810|GO:0006810|GO:0016020|GO:0016021
BAbS19_I02260	ATP/GTP-binding site motif A (P-loop):ABC transporter:AAA ATPase	COG3839G	GO:0000166|GO:0005524|GO:0016887|GO:0017111
BAbS19_I02270	Mandelate racemase/muconate lactonizing enzyme	COG4947S	GO:0003824|GO:0008152|GO:0016853|GO:0018838
BAbS19_I02280	hypothetical protein	COG3254S	GO:0000004|GO:0005554|GO:0008372
BAbS19_I02290	Oxidoreductase, N-terminal	COG0673R	GO:0000004|GO:0005554|GO:0008372
BAbS19_I02300	hypothetical protein	-	GO:0000004|GO:0005554|GO:0008372
BAbS19_I02310	Short-chain dehydrogenase/reductase SDR:Glucose/ribitol dehydrogenase	-	GO:0008152|GO:0008152|GO:0016491|GO:0016491|GO:0016491
BAbS19_I02320	ATP/GTP-binding site motif A (P-loop):Fumarylacetoacetate (FAA) hydrolase	COG0179Q	GO:0016787|GO:0016829
BAbS19_I02330	Mandelate racemase/muconate lactonizing enzyme	COG4947S	GO:0003824|GO:0008152
BAbS19_I02340	Phage integrase	COG0582L	GO:0003677|GO:0003677|GO:0006310|GO:0015074
BAbS19_I02350	hypothetical protein	COG3311K	GO:0000166|GO:0006412
BAbS19_I02360	hypothetical protein	-	GO:0000004|GO:0005554|GO:0008372
BAbS19_I02370	virulence-associated protein E	-	GO:0000004|GO:0005554|GO:0008372
BAbS19_I02400	hypothetical protein	-	GO:0000004|GO:0005554|GO:0008372
BAbS19_I02410	hypothetical protein	-	GO:0003677
BAbS19_I02420	hypothetical protein	-	GO:0000004|GO:0005554|GO:0008372
BAbS19_I02430	Flagellar protein FlgJ:Mannosyl-glycoprotein endo-beta-N-acetylglucosamidase	-	GO:0019861
BAbS19_I02460	hypothetical protein	-	GO:0000004|GO:0005554|GO:0008372
BAbS19_I02470	hypothetical protein	-	GO:0000004|GO:0005554|GO:0008372
BAbS19_I02480	zinc-dependent metallopeptidase	COG2856E	GO:0016787
BAbS19_I02490	hypothetical protein	COG1396K	GO:0043565
BAbS19_I02500	hypothetical protein	-	GO:0000004|GO:0005554|GO:0008372
BAbS19_I02510	hypothetical protein	-	GO:0000004|GO:0005554|GO:0008372
BAbS19_I02520	hypothetical protein	-	GO:0000004|GO:0005554|GO:0008372
BAbS19_I02530	hypothetical protein	-	GO:0000004|GO:0005554|GO:0008372
BAbS19_I02540	hypothetical protein	-	GO:0004888|GO:0016020
BAbS19_I02550	zinc-binding protein	COG3024S	GO:0000004|GO:0005554|GO:0008372
BAbS19_I02560	Maf-like protein	COG0424D	GO:0000004|GO:0005554|GO:0008372
BAbS19_I02570	RNA binding S1:Translation initiation factor IF-1:S1 domain, IF1 type	COG0361J	GO:0003723|GO:0003723|GO:0003723|GO:0003743|GO:0003743|GO:0003743|GO:0003743|GO:0006412|GO:0006413|GO:0006413|GO:0006413
BAbS19_I02580	Low molecular weight phosphotyrosine protein phosphatase	COG0394T	GO:0004725|GO:0006470
BAbS19_I02590	hypothetical protein	COG5328S	GO:0000004|GO:0005554|GO:0008372
BAbS19_I02600	Histidinol dehydrogenase	COG0141E	GO:0000105|GO:0000105|GO:0000105|GO:0000105|GO:0004399|GO:0004399|GO:0004399|GO:0004399|GO:0008270|GO:0008270|GO:0008652|GO:0016491|GO:0046872|GO:0051287
BAbS19_I02610	hypothetical protein	-	GO:0000004|GO:0005554|GO:0008372
BAbS19_I02620	EPSP synthase (3-phosphoshikimate 1-carboxyvinyltransferase):UDP-N-acetylglucosamine 1-carboxyvinyltransferase	COG0766M	GO:0007049|GO:0008360|GO:0008760|GO:0008760|GO:0009252|GO:0009252|GO:0016740|GO:0016740|GO:0019277|GO:0051301
BAbS19_I02630	Bacterial inner-membrane translocator	-	GO:0000004|GO:0005554|GO:0008372
BAbS19_I02640	site-specific recombinase, phage integrase family	COG0582L	GO:0003677|GO:0003677|GO:0006310|GO:0015074
BAbS19_I02650	BRO family protein	COG3617K	GO:0000004|GO:0005554|GO:0008372
BAbS19_I02660	Site-specific recombinase:Resolvase, N-terminal	COG1961L	GO:0000004|GO:0005554|GO:0008372
BAbS19_I02670	hypothetical protein	-	GO:0000004|GO:0005554|GO:0008372
BAbS19_I02680	hypothetical protein	-	GO:0000004|GO:0005554|GO:0008372
BAbS19_I02690	Urease accessory protein UreD	COG0829O	GO:0006807|GO:0016151
BAbS19_I02700	Urease, gamma subunit	COG0831E	GO:0006807|GO:0009039|GO:0009039|GO:0009039|GO:0009039|GO:0016151|GO:0016787|GO:0019627
BAbS19_I02710	Urease, beta subunit	COG0832E	GO:0006807|GO:0009039|GO:0009039|GO:0009039|GO:0009039|GO:0016151|GO:0016787
BAbS19_I02720	Urease:Amidohydrolase	COG0804E	GO:0006807|GO:0009039|GO:0009039|GO:0009039|GO:0009039|GO:0016151|GO:0016151|GO:0016151|GO:0016787|GO:0019627|GO:0046872
BAbS19_I02730	UreE urease accessory, N-terminal:UreE urease accessory, C-terminal	COG2371O	GO:0006457|GO:0006457|GO:0016151|GO:0016151|GO:0016151|GO:0018307|GO:0051082
BAbS19_I02740	urease accessory protein UreF	COG0830O	GO:0006807|GO:0016151
BAbS19_I02750	RecA bacterial DNA recombination protein:ATP/GTP-binding site motif A (P-loop):HypB/UreG, nucleotide-binding:Urease accessory...	COG0377C	GO:0006461|GO:0016151|GO:0016151
BAbS19_I02760	Rice seed allergenic protein RAG:ATP-binding region, ATPase-like:Histidine kinase, HAMP region:Histidine kinase A, N-terminal...	-	GO:0000155|GO:0004673|GO:0005524|GO:0005524|GO:0007165|GO:0016020|GO:0016301|GO:0016310|GO:0016772|GO:0018106
BAbS19_I02770	transporter, putative	COG0845M	GO:0008565|GO:0009306|GO:0016020
BAbS19_I02780	Acriflavin resistance protein	COG0841V	GO:0000004|GO:0005554|GO:0008372
BAbS19_I02810	Peptidase M20/M25/M40	COG0624E	GO:0003837|GO:0008152|GO:0016787|GO:0016813
BAbS19_I02820	Bacterial regulatory protein TetR, HTH motif	COG1309K	GO:0003677|GO:0003700|GO:0006355|GO:0016481|GO:0016566|GO:0045449
BAbS19_I02830	Legume lectin, beta domain:Dihydroorotate dehydrogenase:4Fe-4S ferredoxin, iron-sulfur binding domain:FMN/related compound-bi...	COG0167F	GO:0003824|GO:0004158|GO:0005506|GO:0005529|GO:0005737|GO:0006118|GO:0006207|GO:0008152|GO:0009055
BAbS19_I02840	Pyridine nucleotide-disulphide oxidoreductase, class-II:NAD binding site:Adrenodoxin reductase:Pyridine nucleotide-disulphide...	COG0492O	GO:0004355|GO:0005506|GO:0005506|GO:0006118|GO:0006118|GO:0006118|GO:0006118|GO:0009055|GO:0015036|GO:0016020|GO:0016491|GO:0016491|GO:0016491
BAbS19_I02850	hypothetical protein	COG3427S	GO:0000004|GO:0005554|GO:0008372
BAbS19_I02860	Phosphoglucose isomerase (PGI)	COG0166G	GO:0004347|GO:0004347|GO:0004347|GO:0006094|GO:0006094|GO:0006094|GO:0006096|GO:0006096|GO:0006096|GO:0016853
BAbS19_I02870	arginine/ornithine transport operon protein aot	COG3608R	GO:0000004|GO:0005554|GO:0008372
BAbS19_I02880	Eukaryotic thiol (cysteine) protease:ATPase, E1-E2 type:Blood group Rhesus C/E and D polypeptide:Haloacid dehalogenase/epoxid...	COG0546R	GO:0008152|GO:0008152|GO:0008233|GO:0008967|GO:0008967|GO:0016787|GO:0016787
BAbS19_I02890	Esterase/lipase/thioesterase, active site:ATP/GTP-binding site motif A (P-loop)	COG4757R	GO:0000004|GO:0005554|GO:0008372
BAbS19_I02900	acyl-CoA synthase	COG0316S	GO:0003824|GO:0004467|GO:0008152
BAbS19_I02910	Bacterial regulatory protein TetR, HTH motif	COG1309K	GO:0003677|GO:0003700|GO:0006355|GO:0045449
BAbS19_I02920	Secretion protein HlyD	COG0845M	GO:0008565|GO:0009306|GO:0016020
BAbS19_I02930	Acriflavin resistance protein:Hydrophobe/amphiphile efflux-1 HAE1	COG0841V	GO:0005215|GO:0006810|GO:0016021
BAbS19_I02940	hypothetical protein	-	GO:0000004|GO:0005554|GO:0008372
BAbS19_I02950	Solute-binding protein/glutamate receptor:Bacterial extracellular solute-binding protein, family 3	COG0833E	GO:0004872|GO:0005215|GO:0006810|GO:0030288
BAbS19_I02960	Glycosyl transferase, family 2	COG1215M	GO:0016740
BAbS19_I02970	Domain of unknown function DUF344	COG2326S	GO:0000004|GO:0005554|GO:0008372
BAbS19_I02980	ATP-binding region, ATPase-like:Histidine kinase A, N-terminal:Bacterial sensor protein, C-terminal:Histidine kinase	-	GO:0000155|GO:0004673|GO:0005524|GO:0005524|GO:0007165|GO:0016020|GO:0016301|GO:0016310|GO:0016740|GO:0016772|GO:0018106
BAbS19_I02990	Pollen allergen Poa pIX/Phl pVI, C-terminal	COG5352S	GO:0000004|GO:0005554|GO:0008372
BAbS19_I03000	hypothetical protein	-	GO:0000004|GO:0005554|GO:0008372
BAbS19_I03010	Acetylornithine and succinylornithine aminotransferase:Aminotransferase class-III	COG4992E	GO:0003992|GO:0006525|GO:0008483|GO:0008483|GO:0008483|GO:0016740|GO:0030170
BAbS19_I03020	Aspartate carbamoyltransferase:Ornithine carbamoyltransferase:Aspartate/ornithine carbamoyltransferase:Aspartate/ornithine ca...	COG0078E	GO:0004585|GO:0004585|GO:0006520|GO:0006520|GO:0009348|GO:0016597|GO:0016740|GO:0016743
BAbS19_I03030	Hsp33 protein	COG1281O	GO:0000004|GO:0005554|GO:0008372
BAbS19_I03040	Protein of unknown function DUF525	COG2967P	GO:0000004|GO:0005554|GO:0008372
BAbS19_I03050	Cys/Met metabolism pyridoxal-phosphate-dependent enzyme:O-succinylhomoserine sulfhydrylase	COG0626E	GO:0006520|GO:0016829
BAbS19_I03060	dCTP deaminase	COG0717F	GO:0008829|GO:0016787
BAbS19_I03070	Helix-turn-helix, AraC type:Family of unknown function ThiJ/PfpI	COG4977K	GO:0003677|GO:0003677|GO:0003700|GO:0005622|GO:0006350|GO:0006355|GO:0006355|GO:0043565|GO:0045449
BAbS19_I03080	hypothetical protein	-	GO:0000004|GO:0005554|GO:0008372
BAbS19_I03090	Allergen V5/Tpx-1 related	COG2340S	GO:0000004|GO:0005554|GO:0008372
BAbS19_I03100	Sodium:dicarboxylate symporter:Multi antimicrobial extrusion protein MatE	COG0534V	GO:0006855|GO:0015238|GO:0015297|GO:0016020
BAbS19_I03110	Dihydroorotate dehydrogenase:FMN/related compound-binding core:Dihydroorotate dehydrogenase 2	COG0167F	GO:0003824|GO:0004152|GO:0004152|GO:0004158|GO:0004158|GO:0004158|GO:0006207|GO:0006207|GO:0006221|GO:0006221|GO:0006222|GO:0008152|GO:0016020|GO:0016491
BAbS19_I03120	hypothetical protein	COG3502S	GO:0000004|GO:0005554|GO:0008372
BAbS19_I03130	hypothetical protein	-	GO:0000004|GO:0005554|GO:0008372
BAbS19_I03140	Alpha/beta hydrolase fold:Esterase/lipase/thioesterase, active site:Epoxide hydrolase:Prolyl aminopeptidase S33:Alpha/beta hy...	COG0596R	GO:0004177|GO:0004177|GO:0005737|GO:0006508|GO:0006725|GO:0016787|GO:0016787|GO:0016804|GO:0016804
BAbS19_I03150	Bacterial regulatory protein, LuxR family:Response regulator receiver	COG2195E	GO:0000156|GO:0000160|GO:0000160|GO:0003677|GO:0003700|GO:0005622|GO:0006350|GO:0006355|GO:0006355|GO:0006355|GO:0043565
BAbS19_I03160	Na+/solute symporter:Response regulator receiver:ATP-binding region, ATPase-like:Histidine kinase A, N-terminal:Bacterial sen...	COG0589T	GO:0000155|GO:0000156|GO:0000160|GO:0004673|GO:0004871|GO:0005215|GO:0005524|GO:0005524|GO:0006355|GO:0006810|GO:0007165|GO:0007165|GO:0016020|GO:0016020|GO:0016301|GO:0016310|GO:0016772|GO:0018106
BAbS19_I03170	hypothetical protein	-	GO:0000004|GO:0005554|GO:0008372
BAbS19_I03180	Large-conductance mechanosensitive channel	COG1970M	GO:0005216|GO:0005216|GO:0006810|GO:0006810|GO:0006810|GO:0006811|GO:0015267|GO:0016020|GO:0016020|GO:0016020|GO:0016021
BAbS19_I03190	Aminotransferase, class-II:Aminolevulinic acid synthase:Aminotransferase, class I and II	COG0156H	GO:0003870|GO:0003870|GO:0006783|GO:0008415|GO:0008483|GO:0016740
BAbS19_I03200	Polysaccharide deacetylase	COG0726G	GO:0000004|GO:0005554|GO:0008372
BAbS19_I03210	Glycosyl transferase, family 25	COG3306M	GO:0009103|GO:0016740|GO:0016757
BAbS19_I03220	hypothetical protein	-	GO:0000004|GO:0005554|GO:0008372
BAbS19_I03230	hypothetical protein	-	GO:0000004|GO:0005554|GO:0008372
BAbS19_I03240	Bacterial regulatory protein LysR, HTH motif:LysR substrate binding domain	-	GO:0003677|GO:0003700|GO:0006350|GO:0006355|GO:0006355
BAbS19_I03250	LrgA family	COG1380R	GO:0016021
BAbS19_I03260	LrgB-like protein	COG1346M	GO:0000004|GO:0005554|GO:0008372
BAbS19_I03270	Esterase/lipase/thioesterase, active site	COG4782S	GO:0000004|GO:0005554|GO:0008372
BAbS19_I03280	Pantoate-beta-alanine ligase:Cytidyltransferase-related domain	COG0414H	GO:0003824|GO:0004592|GO:0004592|GO:0009058|GO:0015940|GO:0016740|GO:0016874
BAbS19_I03290	Ketopantoate hydroxymethyltransferase	COG0413H	GO:0003864|GO:0003864|GO:0008168|GO:0015940|GO:0016740
BAbS19_I03300	Phenol hydroxylase reductase:Oxidoreductase FAD/NAD(P)-binding:Flavoprotein pyridine nucleotide cytochrome reductase:NADH:cyt...	COG1018C	GO:0004324|GO:0006118|GO:0006118|GO:0016491|GO:0016491
BAbS19_I03310	Manganese and iron superoxide dismutase:ATP/GTP-binding site motif A (P-loop)	COG0605P	GO:0004784|GO:0004784|GO:0006801|GO:0016491|GO:0046872
BAbS19_I03320	hypothetical protein	-	GO:0000004|GO:0005554|GO:0008372
BAbS19_I03330	Orn/DAP/Arg decarboxylase, family 2:Carboxynorspermidine decarboxylase	COG0019E	GO:0016830|GO:0045312
BAbS19_I03340	ATP/GTP-binding site motif A (P-loop):Saccharopine dehydrogenase	COG1748E	GO:0016491
BAbS19_I03350	ATP/GTP-binding site motif A (P-loop)	COG3938E	GO:0000004|GO:0005554|GO:0008372
BAbS19_I03360	hypothetical protein	-	GO:0000004|GO:0005554|GO:0008372
BAbS19_I03390	invasion protein B	COG5342R	GO:0000004|GO:0005554|GO:0008372
BAbS19_I03400	Gliadin, alpha/beta:ATP-binding region, ATPase-like:Bacterial sensor protein, C-terminal:Histidine kinase	COG4564T	GO:0004673|GO:0005524|GO:0005524|GO:0016301|GO:0016740|GO:0018106
BAbS19_I03410	Bacterial regulatory protein, LuxR family:Response regulator receiver	COG2195E	GO:0000156|GO:0000160|GO:0000160|GO:0003677|GO:0003700|GO:0005622|GO:0006350|GO:0006355|GO:0006355|GO:0006355|GO:0043565
BAbS19_I03420	hypothetical protein	COG4665Q	GO:0000004|GO:0005554|GO:0008372
BAbS19_I03430	Sodium:dicarboxylate symporter:Short-chain dehydrogenase/reductase SDR:Blood group Rhesus C/E and D polypeptide	COG4664Q	GO:0016021
BAbS19_I03440	TRAP dicarboxylate transporter-DctP subunit:Twin-arginine translocation pathway signal	COG4663Q	GO:0000004|GO:0005554|GO:0008372
BAbS19_I03450	hypothetical protein	COG3257R	GO:0000004|GO:0005554|GO:0008372
BAbS19_I03460	Polysaccharide deacetylase	COG0726G	GO:0016787
BAbS19_I03470	hypothetical protein	-	GO:0005496|GO:0006810
BAbS19_I03480	Ferredoxin:Molybdopterin dehydrogenase, FAD-binding:[2Fe-2S]-binding:CO dehydrogenase flavoprotein C-terminal domain:2Fe-2S f...	COG4630F	GO:0004854|GO:0005506|GO:0005506|GO:0006118|GO:0006118|GO:0006118|GO:0009055|GO:0009055|GO:0016491|GO:0016491|GO:0046872
BAbS19_I03490	xanthine dehydrogenase	COG4631F	GO:0006118|GO:0016491|GO:0016491|GO:0030151
BAbS19_I03500	XANTHINE DEHYDROGENASE	COG4631F	GO:0006118|GO:0016491|GO:0016491|GO:0030151
BAbS19_I03510	XdhC protein (assists in molybdopterin insertion into xanthine dehydrogenase)	COG1975O	GO:0000004|GO:0005554|GO:0008372
BAbS19_I03520	transcriptional regulator, LysR family	COG0583K	GO:0003677|GO:0003700|GO:0006350|GO:0006355|GO:0006355
BAbS19_I03530	Cytochrome c heme-binding site	COG3748S	GO:0005506|GO:0005506|GO:0006118|GO:0006118|GO:0009055|GO:0009055|GO:0020037|GO:0020037
BAbS19_I03540	Amidohydrolase	COG0401S	GO:0008892|GO:0016787
BAbS19_I03550	MOFRL	COG2379G	GO:0016491|GO:0016618
BAbS19_I03560	Cytochrome oxidase maturation protein cbb3-type	COG3197P	GO:0000004|GO:0005554|GO:0008372
BAbS19_I03570	Cation-transporting ATPase A, P type:Copper-transporting ATPase:ATPase, E1-E2 type:Mercury scavenger protein:Haloacid dehalog...	COG2217P	GO:0004008|GO:0004008|GO:0005524|GO:0005524|GO:0005524|GO:0006810|GO:0006825|GO:0015662|GO:0015662|GO:0016020|GO:0016020|GO:0016020|GO:0016021|GO:0016787|GO:0030001|GO:0030001|GO:0030001|GO:0046872|GO:0046872|GO:0046873
BAbS19_I03580	nitrogen fixation protein FixH	COG5456P	GO:0000004|GO:0005554|GO:0008372
BAbS19_I03590	4Fe-4S ferredoxin, iron-sulfur binding domain	COG0348C	GO:0005506|GO:0005506|GO:0005506|GO:0006118|GO:0006118|GO:0006810|GO:0009055|GO:0016020|GO:0046872|GO:0051536|GO:0051539
BAbS19_I03600	Cytochrome c heme-binding site:Cytochrome c, class I:Cytochrome c oxidase cbb3-type, subunit III:Cytochrome c, class IC	COG2010C	GO:0004129|GO:0004129|GO:0005506|GO:0005506|GO:0005506|GO:0006118|GO:0006118|GO:0006118|GO:0006118|GO:0009055|GO:0009055|GO:0009055|GO:0016491|GO:0020037|GO:0020037|GO:0020037
BAbS19_I03610	cytochrome c oxidase, cbb3-type, CcoQ subunit	COG4736O	GO:0004129|GO:0016491
BAbS19_I03620	Cytochrome c heme-binding site:Cytochrome C oxidase, mono-heme subunit/FixO	COG2993C	GO:0004129|GO:0004129|GO:0005506|GO:0005506|GO:0006118|GO:0006118|GO:0006118|GO:0009055|GO:0009055|GO:0016491|GO:0020037|GO:0020037
BAbS19_I03630	Cytochrome c oxidase, subunit I:Cytochrome c oxidase cbb3-type, subunit I	COG3278O	GO:0004129|GO:0004129|GO:0004129|GO:0005746|GO:0006118|GO:0006118|GO:0006118|GO:0006810|GO:0016020|GO:0016021|GO:0016491|GO:0045278
BAbS19_I03640	Ferric-uptake regulator	COG0735P	GO:0003700|GO:0006355
BAbS19_I03650	hypothetical protein	-	GO:0000004|GO:0005554|GO:0008372
BAbS19_I03660	DSBA oxidoreductase:Twin-arginine translocation pathway signal	COG1651O	GO:0042597
BAbS19_I03670	aldehyde dehydrogenase family protein	COG1012C	GO:0016491
BAbS19_I03680	Helix-turn-helix, AraC type:Methylated-DNA-[protein]-cysteine S-methyltransferase:Metal binding domain of Ada	COG2169F	GO:0003700|GO:0003908|GO:0003908|GO:0005622|GO:0006281|GO:0006355|GO:0008168|GO:0016740|GO:0043565
BAbS19_I03690	Conserved hypothetical protein, ArsC related:Arsenate reductase and related	COG1393P	GO:0000004|GO:0005554|GO:0008372
BAbS19_I03700	hypothetical protein	COG4129S	GO:0000004|GO:0005554|GO:0008372
BAbS19_I03710	Tetracycline resistance protein:Major facilitator superfamily (MFS)	-	GO:0005215|GO:0006810|GO:0006810|GO:0016020|GO:0016020|GO:0016021|GO:0016021
BAbS19_I03720	bacteroid development protein BacA	COG1133I	GO:0000004|GO:0005554|GO:0008372
BAbS19_I03730	Polysaccharide deacetylase	-	GO:0000004|GO:0005554|GO:0008372
BAbS19_I03740	hypothetical protein	COG4649S	GO:0000004|GO:0005554|GO:0008372
BAbS19_I03750	Uridine kinase:ATP/GTP-binding site motif A (P-loop):Ras GTPase superfamily:GTP-binding protein, HSR1-related:Small GTP-bindi...	COG1160R	GO:0005525|GO:0005525|GO:0005525|GO:0005525|GO:0007264|GO:0016301
BAbS19_I03760	Heat shock protein Hsp70	COG0443O	GO:0000166|GO:0005524|GO:0005524|GO:0006457|GO:0006986
BAbS19_I03770	hypothetical protein	-	GO:0000004|GO:0005554|GO:0008372
BAbS19_I03780	ATP/GTP-binding site motif A (P-loop)	COG3773M	GO:0000004|GO:0005554|GO:0008372
BAbS19_I03790	ATP synthase KO: K02116 ATP synthase protein I	COG5336S	GO:0000004|GO:0005554|GO:0008372
BAbS19_I03800	ATP synthase subunit A	COG0356C	GO:0015992|GO:0016020|GO:0016469|GO:0016787|GO:0016820
BAbS19_I03810	Eubacterial/plasma membrane H+-transporting two-sector ATPase, C subunit:H+-transporting two-sector ATPase, C subunit	COG0636C	GO:0015986|GO:0015986|GO:0016020|GO:0016020|GO:0016469|GO:0016469|GO:0016787|GO:0046933|GO:0046933|GO:0046961|GO:0046961
BAbS19_I03820	H+-transporting two-sector ATPase, B/B' subunit	COG0711C	GO:0016787
BAbS19_I03830	H+-transporting two-sector ATPase, B/B' subunit:ATP synthase F0, subunit B	COG0711C	GO:0015986|GO:0016469|GO:0016787|GO:0046933|GO:0046961
BAbS19_I03840	Ribonuclease HII/HIII	COG0164L	GO:0003723|GO:0004518|GO:0004519|GO:0004523|GO:0004523|GO:0004523|GO:0006401|GO:0016787|GO:0030145|GO:0030145|GO:0046872
BAbS19_I03850	Protein of unknown function DUF85:Elongator protein 3/MiaB/NifB:Radical SAM	COG1533L	GO:0005506|GO:0005506|GO:0046872|GO:0051536|GO:0051539
BAbS19_I03860	hypothetical protein	COG0463M	GO:0000004|GO:0005554|GO:0008372
BAbS19_I03870	hypothetical protein	-	GO:0000004|GO:0005554|GO:0008372
BAbS19_I03880	hypothetical protein	-	GO:0000004|GO:0005554|GO:0008372
BAbS19_I03890	Cell division protein FtsZ:TonB-dependent receptor protein:Homoserine kinase:4-diphosphocytidyl-2C-methyl-D-erythritol kinase...	COG1947I	GO:0000166|GO:0005524|GO:0005524|GO:0008299|GO:0016114|GO:0016114|GO:0016301|GO:0016740|GO:0050515|GO:0050515|GO:0050515
BAbS19_I03900	hypothetical protein	-	GO:0000004|GO:0005554|GO:0008372
BAbS19_I03910	Clp protease:Peptidase U7:Na+/H+ antiporter NhaA	COG3004P	GO:0006508|GO:0006814|GO:0006885|GO:0008233|GO:0008233|GO:0016021|GO:0016787
BAbS19_I03920	METHYLTRANSFERASE	COG4123R	GO:0000004|GO:0005554|GO:0008372
BAbS19_I03930	hypothetical protein	-	GO:0000004|GO:0005554|GO:0008372
BAbS19_I03940	Polyprenyl synthetase	COG0142H	GO:0004161|GO:0008299|GO:0016740
BAbS19_I03950	TPR repeat	COG0457R	GO:0005488
BAbS19_I03960	glycyl-tRNA synthetase alpha subunit	COG0752J	GO:0000166|GO:0004812|GO:0004820|GO:0004820|GO:0004820|GO:0004820|GO:0005524|GO:0005524|GO:0005524|GO:0005524|GO:0006412|GO:0006426|GO:0006426|GO:0006426|GO:0016874
BAbS19_I03970	Glycyl-tRNA synthetase, beta subunit:Heterodimeric glycyl-transfer RNA synthetase	-	GO:0004812|GO:0004820|GO:0004820|GO:0004820|GO:0005524|GO:0005524|GO:0006426|GO:0006426|GO:0016874
BAbS19_I03980	Glycyl-tRNA synthetase, beta subunit:Heterodimeric glycyl-transfer RNA synthetase	COG0751J	GO:0004812|GO:0004820|GO:0004820|GO:0004820|GO:0005524|GO:0005524|GO:0006426|GO:0006426|GO:0016874
BAbS19_I03990	Sua5/YciO/YrdC/YwlC protein family:SUA5:SUA5/yciO/yrdC, N-terminal	COG0009J	GO:0000004|GO:0005554|GO:0008372
BAbS19_I04000	RNA-binding region RNP-1 (RNA recognition motif):FAD linked oxidase, C-terminal:FAD linked oxidase, N-terminal	COG0277C	GO:0000004|GO:0005554|GO:0008372
BAbS19_I04010	Plasmid stabilization system	COG3668R	GO:0000004|GO:0005554|GO:0008372
BAbS19_I04020	hypothetical protein	-	GO:0000004|GO:0005554|GO:0008372
BAbS19_I04030	hypothetical protein	-	GO:0000004|GO:0005554|GO:0008372
BAbS19_I04040	Enoyl-CoA hydratase/isomerase	COG1024I	GO:0004300|GO:0016829|GO:0016853
BAbS19_I04050	Acyl-CoA dehydrogenase, C-terminal:Acyl-CoA dehydrogenase, central domain	COG1960I	GO:0003995|GO:0003995|GO:0003995|GO:0006118|GO:0006118|GO:0008152|GO:0016491|GO:0016627|GO:0050660
BAbS19_I04060	GGDEF	COG2199T	GO:0000004|GO:0005554|GO:0008372
BAbS19_I04070	Phosphoribosylglycinamide synthetase	COG0151F	GO:0003824|GO:0003824|GO:0003824|GO:0003824|GO:0004637|GO:0004637|GO:0005524|GO:0005524|GO:0005524|GO:0005524|GO:0006164|GO:0009113|GO:0016874
BAbS19_I04080	UbiA prenyltransferase:4-hydroxybenzoate polyprenyl transferase, proteobacterial	COG0382H	GO:0004659|GO:0004659|GO:0009058|GO:0016021|GO:0016021|GO:0016740
BAbS19_I04090	Pyridoxamine 5'-phosphate oxidase	COG0259H	GO:0004733|GO:0004733|GO:0004733|GO:0008615|GO:0008615|GO:0008615|GO:0010181|GO:0016491
BAbS19_I04100	hypothetical protein	-	GO:0000004|GO:0005554|GO:0008372
BAbS19_I04110	Heat shock protein DnaJ, N-terminal:Chaperone DnaJ, C-terminal:Heat shock protein DnaJ	COG2214O	GO:0006457|GO:0006457|GO:0006986|GO:0031072|GO:0031072|GO:0051082
BAbS19_I04120	hypothetical protein	-	GO:0000004|GO:0005554|GO:0008372
BAbS19_I04130	Short-chain dehydrogenase/reductase SDR:Glucose/ribitol dehydrogenase	COG0623I	GO:0004318|GO:0008152|GO:0016491|GO:0016491
BAbS19_I04140	Phosphoglycerate/bisphosphoglycerate mutase	COG0406G	GO:0000004|GO:0005554|GO:0008372
BAbS19_I04150	ATP/GTP-binding site motif A (P-loop):Cold-shock DNA-binding domain	COG1278K	GO:0003676|GO:0003676|GO:0003677|GO:0003677|GO:0006350|GO:0006355|GO:0006355
BAbS19_I04160	hypothetical protein	-	GO:0000004|GO:0005554|GO:0008372
BAbS19_I04170	putative lipoprotein	COG2121S	GO:0000004|GO:0005554|GO:0008372
BAbS19_I04180	hypothetical protein	-	GO:0000004|GO:0005554|GO:0008372
BAbS19_I04190	Chorismate synthase	COG0082E	GO:0004107|GO:0004107|GO:0004107|GO:0008652|GO:0009073|GO:0009073|GO:0016089|GO:0016829
BAbS19_I04200	3,4-Dihydroxy-2-butanone 4-phosphate synthase:GTP cyclohydrolase II	COG0108H	GO:0003935|GO:0008686|GO:0009231|GO:0016787
BAbS19_I04210	Histone deacetylase family	COG0122L	GO:0016787|GO:0047611
BAbS19_I04220	Exonuclease VII, small subunit	COG1722L	GO:0004527|GO:0006308|GO:0008855|GO:0008855|GO:0009318|GO:0016787
BAbS19_I04230	DedA family	COG0586S	GO:0000004|GO:0005554|GO:0008372
BAbS19_I04240	Transglycosylase-associated protein	COG2261S	GO:0000004|GO:0005554|GO:0008372
BAbS19_I04250	Ribosomal protein P2	COG3753S	GO:0000004|GO:0005554|GO:0008372
BAbS19_I04260	Protein of unknown function DUF209:Cupin domain	COG1741R	GO:0000004|GO:0005554|GO:0008372
BAbS19_I04270	1-deoxy-D-xylulose-5-phosphate synthase	COG1153C	GO:0008299|GO:0008661|GO:0008661|GO:0008661|GO:0009228|GO:0009228|GO:0016114|GO:0016114|GO:0016740
BAbS19_I04280	Cell division protein FtsJ:RNA-binding S4:Hemolysin A	COG1189J	GO:0003723|GO:0003723|GO:0003723|GO:0019836|GO:0051301
BAbS19_I04290	SAM (and some other nucleotide) binding motif	COG2265J	GO:0008168|GO:0016740
BAbS19_I04300	Conserved hypothetical protein 730	COG1611R	GO:0000004|GO:0005554|GO:0008372
BAbS19_I04310	hypothetical protein	COG3895R	GO:0000004|GO:0005554|GO:0008372
BAbS19_I04320	Peptidoglycan-binding LysM	COG1652S	GO:0016998
BAbS19_I04330	ABC transporter, transmembrane region:ATP/GTP-binding site motif A (P-loop):ABC transporter:AAA ATPase	COG5265O	GO:0000166|GO:0000166|GO:0005524|GO:0005524|GO:0005524|GO:0006810|GO:0016020|GO:0016020|GO:0016021|GO:0016021|GO:0016887|GO:0017111|GO:0042626
BAbS19_I04340	Phosphatidylserine decarboxylase-related:Phosphatidylserine decarboxylase-related protein	COG0688I	GO:0004609|GO:0004609|GO:0008654|GO:0008654|GO:0016829|GO:0016831
BAbS19_I04350	CDP-alcohol phosphatidyltransferase:CDP-diacylglycerol--serine O-phosphatidyltransferase	COG1183I	GO:0003882|GO:0003882|GO:0006656|GO:0008654|GO:0016020|GO:0016740|GO:0016780
BAbS19_I04360	Short-chain dehydrogenase/reductase SDR:Glucose/ribitol dehydrogenase	-	GO:0008152|GO:0008152|GO:0016491|GO:0016491|GO:0016491
BAbS19_I04370	amidophosphoribosyltransferase	COG0034F	GO:0004044|GO:0004044|GO:0009113|GO:0016740
BAbS19_I04380	Colicin V production protein	COG1286R	GO:0000004|GO:0005554|GO:0008372
BAbS19_I04390	RecA bacterial DNA recombination protein:ATP/GTP-binding site motif A (P-loop):Peptidase family S16:AAA ATPase:DNA repair pro...	COG1066O	GO:0000166|GO:0003677|GO:0003684|GO:0004176|GO:0004252|GO:0005524|GO:0005524|GO:0006259|GO:0006281|GO:0006508|GO:0008094|GO:0017111
BAbS19_I04400	ATP/GTP-binding site motif A (P-loop):AAA ATPase:Site-specific recombinase:DnaB helicase:DnaB-like helicase, N-terminal:DnaB-...	COG0305L	GO:0000166|GO:0003677|GO:0003678|GO:0003678|GO:0003678|GO:0004386|GO:0005524|GO:0005524|GO:0005524|GO:0006260|GO:0006260|GO:0006260|GO:0016787|GO:0017111
BAbS19_I04410	SAM (and some other nucleotide) binding motif:Generic methyltransferase:Cyclopropane-fatty-acyl-phospholipid synthase	COG2230M	GO:0008168|GO:0008825|GO:0016740
BAbS19_I04420	Ribosomal protein L9	COG0359J	GO:0003723|GO:0003735|GO:0005622|GO:0005840|GO:0006412|GO:0006412|GO:0019843|GO:0019843|GO:0030529
BAbS19_I04430	hypothetical protein	-	GO:0000004|GO:0005554|GO:0008372
BAbS19_I04440	Ribosomal protein S18	COG0238J	GO:0003735|GO:0005622|GO:0005840|GO:0006412|GO:0030529
BAbS19_I04450	Ribosomal protein S6	COG0360J	GO:0003723|GO:0003735|GO:0005622|GO:0005840|GO:0006412|GO:0006412|GO:0019843|GO:0019843|GO:0030529
BAbS19_I04460	Acyl transferase domain:Malonyl CoA-acyl carrier protein transacylase	COG0331I	GO:0004314|GO:0004314|GO:0006633|GO:0008152|GO:0008415|GO:0016740|GO:0016740
BAbS19_I04470	Short-chain dehydrogenase/reductase SDR:Glucose/ribitol dehydrogenase	-	GO:0004316|GO:0004316|GO:0006633|GO:0008152|GO:0008152|GO:0016491|GO:0016491|GO:0016491|GO:0051287
BAbS19_I04480	Acyl carrier protein (ACP):Phosphopantetheine attachment site:Phosphopantetheine-binding domain	COG0235G	GO:0000036|GO:0006633|GO:0031177|GO:0048037
BAbS19_I04490	Protein kinase:Beta-ketoacyl synthase	COG0303H	GO:0003824|GO:0004315|GO:0006633|GO:0008415|GO:0016301|GO:0016740
BAbS19_I04500	Protein of unknown function DUF175	COG1559R	GO:0016829
BAbS19_I04510	Conserved hypothetical protein 255	COG1561S	GO:0000004|GO:0005554|GO:0008372
BAbS19_I04520	Adenylate kinase:Guanylate kinase:Guanylate kinase/L-type calcium channel region	COG0194F	GO:0000166|GO:0004385|GO:0004385|GO:0005524|GO:0005524|GO:0006163|GO:0016301|GO:0016740
BAbS19_I04530	Modulator of DNA gyrase	COG0312R	GO:0000004|GO:0005554|GO:0008372
BAbS19_I04540	hypothetical protein	COG5342R	GO:0000004|GO:0005554|GO:0008372
BAbS19_I04550	CYTOCHROME C OXIDASE POLYPEPTIDE II	COG1622C	GO:0004129|GO:0004129|GO:0004129|GO:0005507|GO:0005507|GO:0005507|GO:0006118|GO:0006118|GO:0016020|GO:0016021
BAbS19_I04560	Cytochrome c oxidase, subunit I	COG0843C	GO:0004129|GO:0004129|GO:0005746|GO:0006118|GO:0006118|GO:0006810|GO:0016020|GO:0016021|GO:0016491
BAbS19_I04570	protoheme IX farnesyltransferase	COG0109O	GO:0004659|GO:0006783|GO:0006783|GO:0008495|GO:0016020|GO:0016021|GO:0016021|GO:0016021|GO:0016740|GO:0016765
BAbS19_I04600	Cytochrome c oxidase, subunit III	COG1845C	GO:0004129|GO:0004129|GO:0004129|GO:0006118|GO:0006118|GO:0016020|GO:0016020|GO:0016021|GO:0016491
BAbS19_I04630	Surf1 protein	COG3346S	GO:0000004|GO:0005554|GO:0008372
BAbS19_I04640	LytB protein	COG0760O	GO:0019288
BAbS19_I04650	Aminoglycoside phosphotransferase:Homoserine kinase ThrB	COG2334R	GO:0000166|GO:0004413|GO:0005524|GO:0016301|GO:0016740
BAbS19_I04660	RNase H	COG0328L	GO:0000287|GO:0003676|GO:0004518|GO:0004519|GO:0004523|GO:0004523|GO:0016787|GO:0046872
BAbS19_I04670	Alkyl hydroperoxide reductase/ Thiol specific antioxidant/ Mal allergen	COG0678O	GO:0004601|GO:0016209|GO:0016491
BAbS19_I04680	Ribosomal protein S7	COG4231C	GO:0000004|GO:0005554|GO:0008372
BAbS19_I04690	Protein of unknown function DUF179	COG1678K	GO:0000004|GO:0005554|GO:0008372
BAbS19_I04700	PAS domain:GGDEF:PAS-associated C-terminal domain:PAC motif:EAL domain	COG2202T	GO:0000155|GO:0000160|GO:0004871|GO:0006355|GO:0007165|GO:0007165
BAbS19_I04710	GCN5-related N-acetyltransferase	COG1670J	GO:0008080|GO:0008152|GO:0008415|GO:0008999|GO:0016740
BAbS19_I04720	Insulinase-like peptidase, family M16:Peptidase M16 inactive	COG0612R	GO:0004222|GO:0004240|GO:0006508|GO:0016787
BAbS19_I04730	Serine/threonine dehydratase, pyridoxal-phosphate attachment site:Pyridoxal-5'-phosphate-dependent enzyme, beta family:Threon...	COG0498E	GO:0004795|GO:0004795|GO:0006520|GO:0009088|GO:0016829
BAbS19_I04740	hypothetical protein	-	GO:0000004|GO:0005554|GO:0008372
BAbS19_I04750	lipoprotein, putative	-	GO:0000004|GO:0005554|GO:0008372
BAbS19_I04760	EAL domain	COG4943T	GO:0000004|GO:0005554|GO:0008372
BAbS19_I04770	hypothetical protein	-	GO:0000004|GO:0005554|GO:0008372
BAbS19_I04780	Haloacid dehalogenase/epoxide hydrolase:Haloacid dehalogenase-like hydrolase:HAD-superfamily hydrolase, subfamily IA, variant...	COG0637R	GO:0008152|GO:0008967|GO:0016787
BAbS19_I04790	Cl-channel, voltage gated	COG0038P	GO:0005247|GO:0006821|GO:0016020
BAbS19_I04800	ADENINE-SPECIFIC METHYLTRANSFERASE	COG0863L	GO:0003677|GO:0003677|GO:0006306|GO:0006306|GO:0008170|GO:0008170|GO:0009007
BAbS19_I04810	Haloacid dehalogenase-like hydrolase:HAD-superfamily hydrolase, subfamily IA, variant 3	COG1011R	GO:0016787|GO:0018784
BAbS19_I04820	A/G-SPECIFIC ADENINE GLYCOSYLASE	COG1194L	GO:0004519|GO:0004519|GO:0005506|GO:0005622|GO:0006281|GO:0006284|GO:0006284|GO:0016787|GO:0019104
BAbS19_I04830	hypothetical protein	COG5389S	GO:0000004|GO:0005554|GO:0008372
BAbS19_I04840	hypothetical protein	-	GO:0000004|GO:0005554|GO:0008372
BAbS19_I04850	DSBA oxidoreductase:Twin-arginine translocation pathway signal	COG1651O	GO:0042597
BAbS19_I04860	Disease resistance protein:ATP/GTP-binding site motif A (P-loop):Peptidase family S16:SMC protein, N-terminal:Structural main...	COG1196D	GO:0005515|GO:0005524|GO:0005524|GO:0005694|GO:0016020|GO:0016020|GO:0016887|GO:0051277
BAbS19_I04870	COBALT-ZINC-CADMIUM RESISTANCE PROTEIN CZCD	COG1230P	GO:0006812|GO:0008324|GO:0016020
BAbS19_I04880	PUTATIVE HYDROXLASE	COG3324R	GO:0000004|GO:0005554|GO:0008372
BAbS19_I04890	PEP-utilizing enzyme:Pyruvate phosphate dikinase, PEP/pyruvate-binding	COG0574G	GO:0003824|GO:0003824|GO:0005524|GO:0005524|GO:0016301|GO:0016310|GO:0016310|GO:0016740|GO:0016772|GO:0016772|GO:0050242|GO:0050242
BAbS19_I04900	Polysaccharide deacetylase	COG0726G	GO:0000004|GO:0005554|GO:0008372
BAbS19_I04910	hypothetical protein	-	GO:0000004|GO:0005554|GO:0008372
BAbS19_I04920	hypothetical protein	-	GO:0000004|GO:0005554|GO:0008372
BAbS19_I04930	Beta-lactamase-like	COG0491R	GO:0000004|GO:0005554|GO:0008372
BAbS19_I04940	BioY protein	COG1268R	GO:0000004|GO:0005554|GO:0008372
BAbS19_I04950	Ureidoglycolate hydrolase	COG3194F	GO:0000256|GO:0004848|GO:0004848|GO:0016787
BAbS19_I04960	Transthyretin	COG2351R	GO:0005496|GO:0006810|GO:0006810
BAbS19_I04970	ribonuclease III	-	GO:0000004|GO:0005554|GO:0008372
BAbS19_I04980	Polysaccharide biosynthesis protein CapD	COG1085C	GO:0000004|GO:0005554|GO:0008372
BAbS19_I04990	Glycosyl transferase, family 4	COG0472M	GO:0003824|GO:0006629|GO:0016020|GO:0016740|GO:0016757
BAbS19_I05000	TRANSPOSASE	-	GO:0000004|GO:0005554|GO:0008372
BAbS19_I05010	Bacterial regulatory protein LacI, HTH motif	COG2801L	GO:0000004|GO:0005554|GO:0008372
BAbS19_I05020	TRANSPOSASE	-	GO:0000004|GO:0005554|GO:0008372
BAbS19_I05030	P1 ISBm2	-	GO:0003677
BAbS19_I05040	TRANSPOSASE	COG2801L	GO:0003677|GO:0015074
BAbS19_I05050	transposase	COG2801L	GO:0003677|GO:0015074
BAbS19_I05060	Formyl transferase, N-terminal	COG0223J	GO:0008446|GO:0009058|GO:0016740|GO:0016742|GO:0016829
BAbS19_I05070	perosamine synthetase WbkB	-	GO:0000004|GO:0005554|GO:0008372
BAbS19_I05080	ATP/GTP-binding site motif A (P-loop):ABC transporter:AAA ATPase	COG1133I	GO:0000166|GO:0000166|GO:0005524|GO:0005524|GO:0016020|GO:0016020|GO:0016887|GO:0017111
BAbS19_I05090	O-ANTIGEN EXPORT SYSTEM PERMEASE PROTEIN RFBD	COG1681N	GO:0005524|GO:0006810|GO:0016020|GO:0042626
BAbS19_I05100	DegT/DnrJ/EryC1/StrS aminotransferase	COG0399M	GO:0008483|GO:0016740
BAbS19_I05110	Short-chain dehydrogenase/reductase SDR:GDP-mannose 4,6-dehydratase	COG1089M	GO:0005622|GO:0008446|GO:0008446|GO:0016829|GO:0019673
BAbS19_I05120	ISBm1, transposase orfA	-	GO:0000004|GO:0005554|GO:0008372
BAbS19_I05130	transposase	-	GO:0004518|GO:0016787
BAbS19_I05140	transposase	COG2801L	GO:0003677|GO:0015074
BAbS19_I05150	TRANSPOSASE	-	GO:0000004|GO:0005554|GO:0008372
BAbS19_I05160	Transposase, IS4	-	GO:0000004|GO:0005554|GO:0008372
BAbS19_I05170	Glycosyl transferase, group 1	COG0438M	GO:0016740
BAbS19_I05180	IS5 family element, transposase orfA	-	GO:0000004|GO:0005554|GO:0008372
BAbS19_I05190	IS5 family element, transposase orfB	-	GO:0000004|GO:0005554|GO:0008372
BAbS19_I05200	Integrase, catalytic domain	-	GO:0003677|GO:0015074
BAbS19_I05210	Transposase, IS4	COG3293L	GO:0000004|GO:0005554|GO:0008372
BAbS19_I05220	TRANSPOSASE	COG2801L	GO:0000004|GO:0005554|GO:0008372
BAbS19_I05230	PHOSPHOMANNOMUTASE	COG1109G	GO:0004615|GO:0016853
BAbS19_I05240	Mannose-6-phosphate isomerase, type II:Nucleotidyl transferase:Mannose-1-phosphate guanylyltransferase/mannose-6-phosphate is...	COG0836M	GO:0008928|GO:0008928|GO:0009103|GO:0016740|GO:0016779|GO:0016853
BAbS19_I05250	ManA, mannose-6-phosphate isomerase	COG2942G	GO:0003824|GO:0016853
BAbS19_I05260	Glycosyl transferase, group 1	COG0438M	GO:0016740
BAbS19_I05270	ATP/GTP-binding site motif A (P-loop):ABC transporter:AAA ATPase	COG1129G	GO:0000166|GO:0000166|GO:0005524|GO:0005524|GO:0016020|GO:0016020|GO:0016887|GO:0017111
BAbS19_I05280	Tetracycline resistance protein TetB:Bacterial inner-membrane translocator	COG1172G	GO:0000004|GO:0005554|GO:0008372
BAbS19_I05290	Periplasmic binding protein/LacI transcriptional regulator	COG1879G	GO:0000004|GO:0005554|GO:0008372
BAbS19_I05300	iolE protein	COG1082G	GO:0000004|GO:0005554|GO:0008372
BAbS19_I05310	oxidoreductase	COG0673R	GO:0000004|GO:0005554|GO:0008372
BAbS19_I05320	Xylose isomerase	COG2115G	GO:0000287|GO:0000287|GO:0005975|GO:0005975|GO:0006098|GO:0006098|GO:0009045|GO:0009045|GO:0009045|GO:0009045|GO:0016853|GO:0042732|GO:0042732|GO:0046872
BAbS19_I05330	Carbohydrate kinase, FGGY:Xylulokinase	COG1070G	GO:0004856|GO:0004856|GO:0005975|GO:0005997|GO:0016301|GO:0016740
BAbS19_I05340	Bacterial regulatory protein LacI, HTH motif:Periplasmic binding protein/LacI transcriptional regulator	COG1879G	GO:0003677|GO:0003700|GO:0005622|GO:0006350|GO:0006355|GO:0006355
BAbS19_I05350	TRANSCRIPTIONAL REGULATOR, ARAC FAMILY	COG2207K	GO:0003677|GO:0003677|GO:0003700|GO:0005622|GO:0006350|GO:0006355|GO:0006355|GO:0043565|GO:0045449
BAbS19_I05360	TRANSCRIPTIONAL REGULATOR, ARAC FAMILY	-	GO:0000004|GO:0005554|GO:0008372
BAbS19_I05370	Aldehyde dehydrogenase	COG1012C	GO:0006578|GO:0008152|GO:0008802|GO:0008802|GO:0016491|GO:0016491|GO:0016491
BAbS19_I05380	Glucose-methanol-choline oxidoreductase:NAD binding site:GMC oxidoreductase	COG2303E	GO:0006066|GO:0006118|GO:0008812|GO:0016491|GO:0016491|GO:0016614|GO:0050660
BAbS19_I05390	Bacterial regulatory protein TetR, HTH motif	COG1309K	GO:0003677|GO:0003677|GO:0003700|GO:0003700|GO:0006350|GO:0006355|GO:0006355|GO:0019285|GO:0045449|GO:0045892
BAbS19_I05400	hypothetical protein	COG4448E	GO:0000004|GO:0005554|GO:0008372
BAbS19_I05410	Prokaryotic transcription elongation factor GreA/GreB	COG0782K	GO:0003677|GO:0003677|GO:0003711|GO:0003711|GO:0003746|GO:0006355|GO:0006355
BAbS19_I05420	Death-on-curing family protein	COG3654R	GO:0000004|GO:0005554|GO:0008372
BAbS19_I05430	Transcriptional regulator AbrB:SpoVT/AbrB-like domain	-	GO:0000004|GO:0005554|GO:0008372
BAbS19_I05440	Mg2+ transporter protein, CorA-like	COG0598P	GO:0016020|GO:0030001|GO:0046873
BAbS19_I05470	CYANATE TRANSPORT PROTEIN CYNX	COG2807P	GO:0000004|GO:0005554|GO:0008372
BAbS19_I05480	hypothetical protein	-	GO:0000004|GO:0005554|GO:0008372
BAbS19_I05490	ATP/GTP-binding site motif A (P-loop)	COG0433R	GO:0000004|GO:0005554|GO:0008372
BAbS19_I05500	ErfK/YbiS/YcfS/YnhG:Twin-arginine translocation pathway signal	COG1376S	GO:0000004|GO:0005554|GO:0008372
BAbS19_I05510	Haloacid dehalogenase/epoxide hydrolase:Haloacid dehalogenase-like hydrolase:HAD-superfamily hydrolase, subfamily IA, variant 2	COG1011R	GO:0008152|GO:0008152|GO:0016787|GO:0016787|GO:0019120|GO:0019120
BAbS19_I05520	Manganese and iron superoxide dismutase:ATP/GTP-binding site motif A (P-loop)	COG0605P	GO:0004784|GO:0004784|GO:0006801|GO:0016491|GO:0046872
BAbS19_I05530	Metallo-phosphoesterase	-	GO:0000004|GO:0005554|GO:0008372
BAbS19_I05540	Esterase/lipase/thioesterase, active site:Prolyl oligopeptidase:Prolyl oligopeptidase serine protease (S9A):Prolyl endopeptid...	COG1770E	GO:0004287|GO:0006508|GO:0008233|GO:0008945|GO:0016787
BAbS19_I05550	transcriptional regulatory protein MucR	COG4957K	GO:0000004|GO:0005554|GO:0008372
BAbS19_I05560	Hypothetical Cytosolic Protein	-	GO:0000004|GO:0005554|GO:0008372
BAbS19_I05570	DnaA domain protein	COG0593L	GO:0000004|GO:0005554|GO:0008372
BAbS19_I05580	Hypothetical Cytosolic Protein	-	GO:0000004|GO:0005554|GO:0008372
BAbS19_I05590	Amidase:ATP/GTP-binding site motif A (P-loop)	COG0154J	GO:0004040|GO:0016874
BAbS19_I05600	hypothetical protein	COG2166R	GO:0000004|GO:0005554|GO:0008372
BAbS19_I05610	hypothetical protein	-	GO:0000004|GO:0005554|GO:0008372
BAbS19_I05620	ATP-binding region, ATPase-like:Histidine kinase A, N-terminal:Bacterial sensor protein, C-terminal:Histidine kinase	COG0642T	GO:0000155|GO:0004673|GO:0004871|GO:0005524|GO:0005524|GO:0007165|GO:0007165|GO:0016020|GO:0016301|GO:0016310|GO:0016772|GO:0018106
BAbS19_I05630	Putative peptidoglycan binding domain 1	COG3409M	GO:0000270
BAbS19_I05640	hypothetical protein	COG5447S	GO:0000004|GO:0005554|GO:0008372
BAbS19_I05650	hypothetical protein	COG5330S	GO:0000004|GO:0005554|GO:0008372
BAbS19_I05660	hypothetical protein	COG5436S	GO:0000004|GO:0005554|GO:0008372
BAbS19_I05670	hypothetical protein	COG5402S	GO:0000004|GO:0005554|GO:0008372
BAbS19_I05680	Glycosyl transferase, family 51:Penicillin-binding protein, transpeptidase domain	COG0744M	GO:0003824|GO:0008233|GO:0009252|GO:0009252|GO:0009274|GO:0016740|GO:0016763|GO:0046677
BAbS19_I05690	hypothetical protein	-	GO:0003677
BAbS19_I05700	ATP/GTP-binding site motif A (P-loop)	COG5323S	GO:0000004|GO:0005554|GO:0008372
BAbS19_I05710	Phage portal protein, HK97 family:Phage portal protein	COG4695S	GO:0000004|GO:0005554|GO:0008372
BAbS19_I05720	hypothetical protein	-	GO:0000004|GO:0005554|GO:0008372
BAbS19_I05730	Phage prohead protease HK97	COG3740R	GO:0008233
BAbS19_I05740	Phage major capsid protein, HK97 family	COG4653R	GO:0000004|GO:0005554|GO:0008372
BAbS19_I05750	hypothetical protein	-	GO:0000004|GO:0005554|GO:0008372
BAbS19_I05760	Phage head-tail adaptor, putative	COG5614R	GO:0000004|GO:0005554|GO:0008372
BAbS19_I05770	hypothetical protein	-	GO:0000004|GO:0005554|GO:0008372
BAbS19_I05780	hypothetical protein	COG5437S	GO:0000004|GO:0005554|GO:0008372
BAbS19_I05790	hypothetical protein	-	GO:0000004|GO:0005554|GO:0008372
BAbS19_I05800	phage minor tail protein H	COG5281S	GO:0000004|GO:0005554|GO:0008372
BAbS19_I05810	hypothetical protein	COG5448S	GO:0000004|GO:0005554|GO:0008372
BAbS19_I05820	hypothetical protein	COG5449S	GO:0004623|GO:0006644|GO:0016042
BAbS19_I05830	NLP/P60	COG0791M	GO:0000004|GO:0005554|GO:0008372
BAbS19_I05860	hypothetical protein	-	GO:0000004|GO:0005554|GO:0008372
BAbS19_I05870	hypothetical protein	-	GO:0000004|GO:0005554|GO:0008372
BAbS19_I05880	Response regulator receiver:Transcriptional regulatory protein, C terminal:Sugar transporter superfamily	COG0744M	GO:0000156|GO:0000156|GO:0000160|GO:0000160|GO:0003677|GO:0005351|GO:0006355|GO:0006355
BAbS19_I05890	ATP-binding region, ATPase-like:Histidine kinase, HAMP region:Histidine kinase A, N-terminal:Bacterial sensor protein, C-term...	COG0642T	GO:0000155|GO:0004673|GO:0004871|GO:0005524|GO:0005524|GO:0007165|GO:0007165|GO:0016020|GO:0016020|GO:0016301|GO:0016310|GO:0016740|GO:0016772|GO:0018106
BAbS19_I05900	outer membrane lipoprotein-related protein	COG4520M	GO:0000004|GO:0005554|GO:0008372
BAbS19_I05910	TPR repeat	COG4235O	GO:0005488
BAbS19_I05920	CcmE/CycJ proteins	COG2332O	GO:0005506|GO:0016020|GO:0016020|GO:0016021|GO:0017003|GO:0017004|GO:0017004|GO:0046872
BAbS19_I05930	Cytochrome c assembly protein:Cytochrome c-type biogenesis protein:Cytochrome c-type biogenesis protein CcmF	COG1138O	GO:0015232|GO:0015232|GO:0015886|GO:0015886|GO:0016020|GO:0016020|GO:0017004|GO:0017004
BAbS19_I05940	Cytochrome C biogenesis protein	COG3088O	GO:0000004|GO:0005554|GO:0008372
BAbS19_I05950	Serine protease, V8 family:Serine protease, trypsin family:PDZ/DHR/GLGF domain:HtrA/DegQ protease	COG0265O	GO:0004252|GO:0004252|GO:0004252|GO:0005515|GO:0006508|GO:0006508|GO:0008233|GO:0016787|GO:0042597
BAbS19_I05960	Response regulator receiver:Transcriptional regulatory protein, C terminal	COG0744M	GO:0000156|GO:0000156|GO:0000160|GO:0000160|GO:0000160|GO:0003677|GO:0003677|GO:0006350|GO:0006355|GO:0006355|GO:0006355
BAbS19_I05970	ATP-binding region, ATPase-like:Histidine kinase, HAMP region:Histidine kinase A, N-terminal:Bacterial sensor protein, C-term...	COG0642T	GO:0000155|GO:0004673|GO:0004871|GO:0005524|GO:0005524|GO:0007165|GO:0007165|GO:0016020|GO:0016020|GO:0016301|GO:0016310|GO:0016740|GO:0016772|GO:0018106
BAbS19_I05980	Rhodopsin-like GPCR superfamily:Glutamate-ammonia ligase adenylyltransferase	COG1390C	GO:0008882|GO:0016740|GO:0016779|GO:0016874
BAbS19_I05990	LPSA PROTEIN	COG3306M	GO:0000004|GO:0005554|GO:0008372
BAbS19_I06000	PAS domain:PAC motif:ATP-binding region, ATPase-like:Histidine kinase A, N-terminal:Bacterial sensor protein, C-terminal:Hist...	COG2202T	GO:0000155|GO:0004673|GO:0004871|GO:0005524|GO:0005524|GO:0006355|GO:0007165|GO:0007165|GO:0007165|GO:0016020|GO:0016301|GO:0016310|GO:0016772|GO:0018106
BAbS19_I06010	Membrane alanine aminopeptidase:Neutral zinc metallopeptidase, zinc-binding region	COG0308E	GO:0004177|GO:0004179|GO:0004179|GO:0004179|GO:0006508|GO:0008270|GO:0016787
BAbS19_I06020	Protein of unknown function DUF6	COG0696G	GO:0000004|GO:0005554|GO:0008372
BAbS19_I06030	General substrate transporter:Major facilitator superfamily (MFS)	-	GO:0005215|GO:0006810|GO:0006810|GO:0016020|GO:0016020|GO:0016021|GO:0016021
BAbS19_I06040	ATP/GTP-binding site motif A (P-loop):Uracil-DNA glycosylase superfamily:Phage SPO1 DNA polymerase-related protein	COG1573L	GO:0003887|GO:0016740|GO:0016779
BAbS19_I06050	NAD binding site:ATP/GTP-binding site motif A (P-loop):Aromatic-ring hydroxylase:Electron transfer flavoprotein-ubiquinone ox...	COG0644C	GO:0004174|GO:0006118|GO:0008152|GO:0016491|GO:0016491
BAbS19_I06060	Endonuclease/exonuclease/phosphatase family	COG3021S	GO:0004519|GO:0004527
BAbS19_I06070	Purine and other phosphorylase, family 1	COG0775F	GO:0008152|GO:0008714|GO:0016787|GO:0016798
BAbS19_I06080	hypothetical protein	-	GO:0000004|GO:0005554|GO:0008372
BAbS19_I06090	Glutathione S-transferase, N-terminal:Glutathione S-transferase, C-terminal	COG0625O	GO:0004364|GO:0016740
BAbS19_I06100	hypothetical protein	COG4731S	GO:0000004|GO:0005554|GO:0008372
BAbS19_I06110	hypothetical protein	-	GO:0000004|GO:0005554|GO:0008372
BAbS19_I06120	hypothetical protein	COG0790R	GO:0000004|GO:0005554|GO:0008372
BAbS19_I06130	Protein of unknown function DUF161	COG1284S	GO:0000004|GO:0005554|GO:0008372
BAbS19_I06140	Antifreeze protein, type I	-	GO:0000004|GO:0005554|GO:0008372
BAbS19_I06150	Protein of unknown function DUF423	COG2363S	GO:0000004|GO:0005554|GO:0008372
BAbS19_I06160	Aminotransferase, class-II:Aminotransferase, class I and II	COG0079E	GO:0004400|GO:0008152|GO:0008483|GO:0016740|GO:0016740
BAbS19_I06170	Phage integrase:Phage integrase, N-terminal SAM-like	COG0582L	GO:0003677|GO:0003677|GO:0006310|GO:0015074
BAbS19_I06180	ATP/GTP-binding site motif A (P-loop):Porin, alpha proteobacteria type	-	GO:0015288|GO:0016021|GO:0019867
BAbS19_I06190	Aminoacyl-tRNA synthetase, class I:ATP/GTP-binding site motif A (P-loop):Autotransporter beta-domain:Outer membrane autotran...	-	GO:0004812
BAbS19_I06200	hypothetical protein	-	GO:0000004|GO:0005554|GO:0008372
BAbS19_I06210	hypothetical protein	COG3743S	GO:0000004|GO:0005554|GO:0008372
BAbS19_I06220	transglycosylase SLT domain protein	COG0741M	GO:0000004|GO:0005554|GO:0008372
BAbS19_I06230	Dihydrodipicolinate synthetase:Dihydrodipicolinate synthase subfamily	COG0328L	GO:0003824|GO:0008152|GO:0008152|GO:0008840|GO:0016829|GO:0016829
BAbS19_I06240	SmpB protein	COG0691O	GO:0003723|GO:0006412
BAbS19_I06250	Uracil-DNA glycosylase superfamily	COG1573L	GO:0000004|GO:0005554|GO:0008372
BAbS19_I06260	Protein of unknown function DUF88	COG1432S	GO:0000004|GO:0005554|GO:0008372
BAbS19_I06270	hypothetical protein	-	GO:0000004|GO:0005554|GO:0008372
BAbS19_I06280	RNA polymerase, omega subunit:RNA polymerase Rpb6	COG1758K	GO:0003677|GO:0003899|GO:0003899|GO:0003899|GO:0003899|GO:0006350|GO:0006350|GO:0006351|GO:0016740|GO:0016779
BAbS19_I06290	Amino acid-binding ACT:Metal dependent phosphohydrolase, HD region:TGS domain:RelA/SpoT protein:Metal-dependent phosphohydrol...	COG0316S	GO:0003824|GO:0008893|GO:0015969|GO:0016787
BAbS19_I06300	Phosphoribosyltransferase:Purine/pyrimidine phosphoribosyl transferase:Orotate phosphoribosyltransferase, Thermus type	COG0461F	GO:0004588|GO:0004588|GO:0006221|GO:0016740|GO:0016740|GO:0016757|GO:0019856
BAbS19_I06310	Cyclic nucleotide-binding domain:Bacterial regulatory protein, Crp family	COG0664T	GO:0003677|GO:0003677|GO:0003700|GO:0005622|GO:0006350|GO:0006355|GO:0006355|GO:0045449
BAbS19_I06320	Oxygen-independent coproporphyrinogen III oxidase HemN:Elongator protein 3/MiaB/NifB:Radical SAM	COG0635H	GO:0004109|GO:0004109|GO:0005506|GO:0005506|GO:0005737|GO:0006779|GO:0006779|GO:0016491|GO:0046872|GO:0051536|GO:0051539
BAbS19_I06330	Major facilitator superfamily (MFS)	-	GO:0005215|GO:0006810|GO:0006810|GO:0016020|GO:0016020|GO:0016021|GO:0016021
BAbS19_I06340	TRANSCRIPTIONAL REGULATOR, ARAC FAMILY	COG2207K	GO:0003677|GO:0003700|GO:0005622|GO:0006355|GO:0043565|GO:0045449
BAbS19_I06350	hypothetical protein	COG3216S	GO:0000004|GO:0005554|GO:0008372
BAbS19_I06360	Holo-acyl carrier protein synthase:Phosphopantethiene-protein transferase domain	COG0736I	GO:0000287|GO:0000287|GO:0000287|GO:0000287|GO:0006633|GO:0006633|GO:0006633|GO:0006633|GO:0008610|GO:0008897|GO:0008897|GO:0008897|GO:0008897|GO:0008897|GO:0009059|GO:0016740|GO:0046872
BAbS19_I06370	Bacterial signal peptidase S26A:Signal peptidase	COG0681U	GO:0006508|GO:0008236|GO:0009004|GO:0016020|GO:0016787
BAbS19_I06380	Ribonuclease III family:Double-stranded RNA binding (DsRBD) domain	COG0571K	GO:0003723|GO:0003723|GO:0003723|GO:0003723|GO:0003725|GO:0004518|GO:0004519|GO:0004525|GO:0004525|GO:0004525|GO:0004525|GO:0005622|GO:0005622|GO:0006364|GO:0006396|GO:0006397|GO:0016075|GO:0016787
BAbS19_I06390	Serpin:Elongation factor, GTP-binding:ATP/GTP-binding site motif A (P-loop):Type 2 KH domain:Small GTP-binding protein domain...	COG1159R	GO:0003676|GO:0003723|GO:0003746|GO:0005525|GO:0005525|GO:0005622
BAbS19_I06400	Cytochrome P450:Recombination protein O, RecO	COG1381L	GO:0006281|GO:0006281|GO:0006281|GO:0006310|GO:0006310|GO:0006310|GO:0006974
BAbS19_I06410	Tyrosine specific protein phosphatase and dual specificity protein phosphatase	COG5350R	GO:0016311|GO:0016791
BAbS19_I06420	hypothetical protein	COG1896R	GO:0003824
BAbS19_I06430	Glycine cleavage T protein (aminomethyl transferase)	COG0354R	GO:0016740
BAbS19_I06440	Dihydroorotase:Dihydroorotase multifunctional complex type:Amidohydrolase	COG0044F	GO:0004151|GO:0016787|GO:0016812
BAbS19_I06450	hypothetical protein	-	GO:0000004|GO:0005554|GO:0008372
BAbS19_I06460	hypothetical protein	-	GO:0000004|GO:0005554|GO:0008372
BAbS19_I06470	hypothetical protein	COG5451S	GO:0000004|GO:0005554|GO:0008372
BAbS19_I06480	NUDIX hydrolase	COG1051F	GO:0004452|GO:0008299|GO:0016787|GO:0016787
BAbS19_I06490	Protein of unknown function DUF159	COG2135S	GO:0000004|GO:0005554|GO:0008372
BAbS19_I06500	Lysine exporter protein (LYSE/YGGA)	COG1279R	GO:0000004|GO:0005554|GO:0008372
BAbS19_I06510	hypothetical protein	-	GO:0000004|GO:0005554|GO:0008372
BAbS19_I06520	hypothetical protein	-	GO:0000004|GO:0005554|GO:0008372
BAbS19_I06530	Cysteinyl-tRNA synthetase, class Ia	COG0215J	GO:0000166|GO:0004812|GO:0004817|GO:0004817|GO:0004817|GO:0005524|GO:0005524|GO:0005524|GO:0006412|GO:0006423|GO:0006423|GO:0008270|GO:0016874|GO:0046872
BAbS19_I06540	HMG-CoA lyase-like:Alpha-isopropylmalate/homocitrate synthase:Aldehyde dehydrogenase:2-isopropylmalate synthase/homocitrate s...	COG0119E	GO:0003824|GO:0003824|GO:0003852|GO:0008152|GO:0008415|GO:0016740|GO:0016829|GO:0019752|GO:0046912
BAbS19_I06550	Protein of unknown function DUF6:RarD protein	COG2962R	GO:0000004|GO:0005554|GO:0008372
BAbS19_I06560	Peptidase M23/M37	COG0739M	GO:0004222|GO:0006508
BAbS19_I06570	SAM (and some other nucleotide) binding motif:Ribosomal RNA adenine dimethylase	COG0030J	GO:0000154|GO:0000154|GO:0000179|GO:0003723|GO:0006364|GO:0006364|GO:0008168|GO:0008649|GO:0016433|GO:0016433|GO:0016740|GO:0046677|GO:0046677
BAbS19_I06580	Pyridoxal phosphate biosynthetic protein PdxA	COG1995H	GO:0016491|GO:0050570
BAbS19_I06590	peptidyl-prolyl cis-trans isomerase, putative	COG0760O	GO:0016853
BAbS19_I06600	Organic solvent tolerance protein	COG1452M	GO:0000004|GO:0005554|GO:0008372
BAbS19_I06610	Predicted permease YjgP/YjgQ family	COG0795R	GO:0000004|GO:0005554|GO:0008372
BAbS19_I06620	Predicted permease YjgP/YjgQ family	COG0795R	GO:0000004|GO:0005554|GO:0008372
BAbS19_I06630	Cytosol aminopeptidase:Aromatic amino acid hydroxylase	COG0260E	GO:0004177|GO:0004177|GO:0004178|GO:0004178|GO:0005622|GO:0005737|GO:0006508|GO:0016787|GO:0019538|GO:0030145
BAbS19_I06640	DNA polymerase III chi subunit, HolC	COG2927L	GO:0003887|GO:0016740|GO:0016779
BAbS19_I06650	hypothetical protein	-	GO:0000004|GO:0005554|GO:0008372
BAbS19_I06660	ATP/GTP-binding site motif A (P-loop):ABC transporter:AAA ATPase	COG0488R	GO:0000166|GO:0000166|GO:0005524|GO:0005524|GO:0016020|GO:0016020|GO:0016887|GO:0017111
BAbS19_I06670	DinB	COG2318S	GO:0000004|GO:0005554|GO:0008372
BAbS19_I06680	Nucleoside diphosphate kinase	COG0105F	GO:0000166|GO:0000287|GO:0000287|GO:0004550|GO:0004550|GO:0004550|GO:0004550|GO:0005524|GO:0005524|GO:0005524|GO:0005524|GO:0006183|GO:0006183|GO:0006228|GO:0006228|GO:0006241|GO:0006241|GO:0009117|GO:0009209|GO:0016301|GO:0016740|GO:0046872
BAbS19_I06690	Protein of unknown function DUF306	COG3126S	GO:0000004|GO:0005554|GO:0008372
BAbS19_I06700	Molybdopterin biosynthesis MoaE	COG0314H	GO:0000004|GO:0005554|GO:0008372
BAbS19_I06710	ThiamineS	COG1977H	GO:0006777
BAbS19_I06720	CDP-alcohol phosphatidyltransferase:NADH-ubiquinone oxidoreductase, chain 4:CDP-diacylglycerol--glycerol-3-phosphate 3-phosph...	COG0558I	GO:0008444|GO:0008444|GO:0008654|GO:0008654|GO:0016020|GO:0016021|GO:0016740|GO:0016780
BAbS19_I06730	excinuclease ABC subunit C	COG0322L	GO:0003677|GO:0003677|GO:0003677|GO:0004518|GO:0004518|GO:0004518|GO:0004518|GO:0005622|GO:0005622|GO:0005737|GO:0006281|GO:0006281|GO:0006281|GO:0006281|GO:0006281|GO:0006281|GO:0006289|GO:0006289|GO:0006289|GO:0006289|GO:0006974|GO:0009380|GO:0009381|GO:0009381|GO:0009432|GO:0009432|GO:0043565
BAbS19_I06740	short chain dehydrogenase	-	GO:0004316|GO:0008152|GO:0008152|GO:0016491|GO:0016491|GO:0016491
BAbS19_I06750	OmpA-like transmembrane domain	COG3637M	GO:0016021
BAbS19_I06760	Aminoacyl-tRNA synthetase, class I:Glutathione S-transferase, N-terminal	COG0625O	GO:0004812|GO:0016740
BAbS19_I06770	Ribonuclease T2	COG3719J	GO:0003723|GO:0004521
BAbS19_I06780	hypothetical protein	COG5511R	GO:0000004|GO:0005554|GO:0008372
BAbS19_I06790	N-6 Adenine-specific DNA methylase:Protein of unknown function DUF519	COG2961R	GO:0000004|GO:0005554|GO:0008372
BAbS19_I06800	Protein of unknown function DUF6	COG0696G	GO:0000004|GO:0005554|GO:0008372
BAbS19_I06810	Immunoglobulin/major histocompatibility complex:Prokaryotic molybdopterin oxidoreductase:Molybdopterin oxidoreductase:Molydop...	COG0243C	GO:0006118|GO:0016491
BAbS19_I06820	hypothetical protein	-	GO:0000004|GO:0005554|GO:0008372
BAbS19_I06830	phosphoribosylglycinamide formyltransferase	COG0299F	GO:0004644|GO:0004644|GO:0006189|GO:0009058|GO:0016742
BAbS19_I06840	AIR synthase related protein:Phosphoribosylformylglycinamidine cyclo-ligase	COG0150F	GO:0004641|GO:0004641|GO:0004641|GO:0005737|GO:0006164|GO:0006164|GO:0006189|GO:0016874
BAbS19_I06850	hypothetical protein	-	GO:0000004|GO:0005554|GO:0008372
BAbS19_I06860	ATP/GTP-binding protein	COG0628R	GO:0000004|GO:0005554|GO:0008372
BAbS19_I06870	UDP-glucose 4-epimerase	COG0450O	GO:0003978|GO:0016853
BAbS19_I06880	Proline-rich region:Proline-rich extensin	-	GO:0000004|GO:0005554|GO:0008372
BAbS19_I06890	Short-chain dehydrogenase/reductase SDR:Glucose/ribitol dehydrogenase	-	GO:0008152|GO:0008152|GO:0016491|GO:0016491|GO:0016491
BAbS19_I06900	hypothetical protein	-	GO:0000004|GO:0005554|GO:0008372
BAbS19_I06910	hypothetical protein	-	GO:0000004|GO:0005554|GO:0008372
BAbS19_I06920	L-lactate permease	COG1620C	GO:0015129|GO:0015727
BAbS19_I06930	ETC complex I subunit conserved region	-	GO:0006118|GO:0016651
BAbS19_I06940	hypothetical protein	-	GO:0000004|GO:0005554|GO:0008372
BAbS19_I06950	Exonuclease	-	GO:0004518|GO:0004527|GO:0016787
BAbS19_I06960	ADENYLATE KINASE	COG2019F	GO:0004017
BAbS19_I06970	GCN5-related N-acetyltransferase	-	GO:0008080|GO:0008152|GO:0016740
BAbS19_I06980	Helix-turn-helix motif	COG4933S	GO:0043565
BAbS19_I06990	Integrase, catalytic domain	COG2801L	GO:0003677|GO:0015074
BAbS19_I07000	transposition protein, putative	-	GO:0000004|GO:0005554|GO:0008372
BAbS19_I07030	hypothetical protein	-	GO:0000004|GO:0005554|GO:0008372
BAbS19_I07040	Beta and gamma crystallin	-	GO:0000004|GO:0005554|GO:0008372
BAbS19_I07080	hypothetical protein	COG4916S	GO:0004888|GO:0016020
BAbS19_I07090	Bacterial SH3-like region	COG4991S	GO:0000004|GO:0005554|GO:0008372
BAbS19_I07100	hypothetical protein	-	GO:0000004|GO:0005554|GO:0008372
BAbS19_I07110	Cys/Met metabolism pyridoxal-phosphate-dependent enzyme:Cystathionine beta-lyase, bacterial	COG0626E	GO:0004121|GO:0004121|GO:0005737|GO:0006520|GO:0006520|GO:0016829
BAbS19_I07120	PA-phosphatase related phosphoesterase	COG0671I	GO:0000004|GO:0005554|GO:0008372
BAbS19_I07150	GENERAL L-AMINO ACID TRANSPORT SYSTEM PERMEASE PROTEIN AAPQ	COG4597E	GO:0005215|GO:0005215|GO:0006810|GO:0006810|GO:0006810|GO:0009276|GO:0016020|GO:0016021|GO:0016021
BAbS19_I07160	amino acid ABC transporter, permease protein KO: K02028 polar amino acid transport system ATP-binding proetin	-	GO:0005524
BAbS19_I07170	Binding-protein-dependent transport systems inner membrane component:Tetracycline resistance protein	COG0765E	GO:0005215|GO:0005215|GO:0006810|GO:0006810|GO:0006810|GO:0009276|GO:0016020|GO:0016021|GO:0016021
BAbS19_I07180	amino acid ABC transporter, ATP-binding protein	COG1126E	GO:0000166|GO:0000166|GO:0005524|GO:0005524|GO:0016020|GO:0016020|GO:0016887|GO:0017111
BAbS19_I07190	NAD binding site:Flavoprotein monooxygenase:Adrenodoxin reductase:Aromatic-ring hydroxylase	COG0653U	GO:0004497|GO:0006118|GO:0008152|GO:0016491|GO:0016491|GO:0018658
BAbS19_I07200	hypothetical protein	COG4391S	GO:0000004|GO:0005554|GO:0008372
BAbS19_I07210	polyphosphate kinase	COG0855P	GO:0008976|GO:0016740
BAbS19_I07220	phosphatase, Ppx/GppA family	COG0247C	GO:0000004|GO:0005554|GO:0008372
BAbS19_I07230	Rnd, ribonuclease D	COG0349J	GO:0003676|GO:0003676|GO:0004540|GO:0005622|GO:0005622|GO:0005737|GO:0008033|GO:0008408
BAbS19_I07240	Aspartyl-tRNA synthetase, class IIb:GAD domain:tRNA synthetase, class II (D, K and N):OB-fold nucleic acid binding domain:Asp...	COG0173J	GO:0000166|GO:0004812|GO:0004812|GO:0004815|GO:0004815|GO:0004815|GO:0004815|GO:0005524|GO:0005524|GO:0005524|GO:0005524|GO:0005524|GO:0005737|GO:0006412|GO:0006418|GO:0006422|GO:0006422|GO:0006422|GO:0016874
BAbS19_I07250	hypothetical protein	-	GO:0000004|GO:0005554|GO:0008372
BAbS19_I07260	DNA gyrase/topoisomerase IV, subunit A:Gram negative topoisomerase IV, subunit A:DNA gyrase C-terminal repeat, beta-propeller	COG0188L	GO:0003677|GO:0003677|GO:0003677|GO:0003677|GO:0003677|GO:0003918|GO:0003918|GO:0003918|GO:0003918|GO:0003918|GO:0005524|GO:0005524|GO:0005524|GO:0005524|GO:0005524|GO:0005694|GO:0005694|GO:0005694|GO:0005694|GO:0005694|GO:0006259|GO:0006259|GO:0006259|GO:0006265|GO:0006265|GO:0006265|GO:0006265|GO:0006265|GO:0006268|GO:0016853
BAbS19_I07270	Phosphofructokinase:Arginine-tRNA-protein transferase, N-terminal:Arginine-tRNA-protein transferase, C-terminal	COG2935O	GO:0004057|GO:0004057|GO:0008415|GO:0016740|GO:0030163
BAbS19_I07280	hypothetical protein	COG1714S	GO:0000004|GO:0005554|GO:0008372
BAbS19_I07290	Delta-aminolevulinic acid dehydratase	COG0113H	GO:0003824|GO:0004655|GO:0006779|GO:0006783|GO:0008152|GO:0016829
BAbS19_I07300	Enoyl-CoA hydratase/isomerase	COG1024I	GO:0004300|GO:0016829|GO:0016853
BAbS19_I07310	hypothetical protein	-	GO:0000004|GO:0005554|GO:0008372
BAbS19_I07320	Bacterial regulatory protein, MarR family	COG1846K	GO:0003677|GO:0003700|GO:0005622|GO:0006350|GO:0006355|GO:0006355
BAbS19_I07330	hypothetical protein	-	GO:0000004|GO:0005554|GO:0008372
BAbS19_I07340	Putative peptidoglycan binding domain 1:Twin-arginine translocation pathway signal	COG2989S	GO:0000270
BAbS19_I07350	hypothetical protein	-	GO:0000004|GO:0005554|GO:0008372
BAbS19_I07360	Glycine hydroxymethyltransferase	COG0112E	GO:0004372|GO:0004372|GO:0004372|GO:0006544|GO:0006563|GO:0006730|GO:0006730|GO:0009069|GO:0016740
BAbS19_I07370	Protein of unknown function DUF193:ATP cone domain	COG1327K	GO:0000166|GO:0003677|GO:0005524|GO:0006350|GO:0006355|GO:0008270|GO:0016564|GO:0046872
BAbS19_I07380	Cytidine/deoxycytidylate deaminase, zinc-binding region:Bacterial bifunctional deaminase-reductase, C-terminal:Riboflavin bio...	COG1985H	GO:0008703|GO:0008703|GO:0008835|GO:0009231|GO:0016491
BAbS19_I07390	Rhodopsin-like GPCR superfamily:Lumazine-binding protein	COG0307H	GO:0004746|GO:0016740
BAbS19_I07400	6,7-dimethyl-8-ribityllumazine synthase	COG0054H	GO:0004746|GO:0004746|GO:0009231|GO:0009231|GO:0009349|GO:0016740
BAbS19_I07410	Antitermination protein NusB	COG0781K	GO:0003715|GO:0003723|GO:0006350|GO:0006353|GO:0006353|GO:0006353|GO:0006355|GO:0006355
BAbS19_I07420	membrane-bound proton-translocating pyrophosphatase	COG3808C	GO:0000287|GO:0000287|GO:0004427|GO:0004427|GO:0004427|GO:0006810|GO:0006811|GO:0009678|GO:0015078|GO:0015992|GO:0015992|GO:0016020|GO:0016020|GO:0016021|GO:0016787
BAbS19_I07430	SmpA/OmlA	COG2913J	GO:0000004|GO:0005554|GO:0008372
BAbS19_I07440	Ubiquinol-cytochrome C chaperone	COG5452S	GO:0000004|GO:0005554|GO:0008372
BAbS19_I07450	hypothetical protein	-	GO:0000004|GO:0005554|GO:0008372
BAbS19_I07460	Fatty acid synthesis plsX protein	COG0416I	GO:0003824|GO:0006633|GO:0006633
BAbS19_I07470	Naringenin-chalcone synthase:Beta-ketoacyl-acyl carrier protein synthase III (FabH)	COG0332I	GO:0004315|GO:0004315|GO:0006633|GO:0008415|GO:0016740
BAbS19_I07480	Histone-like bacterial DNA-binding protein:Integration host factor, alpha subunit	COG0776L	GO:0003677|GO:0003677|GO:0003677|GO:0003677|GO:0003677|GO:0005694|GO:0006310|GO:0006310|GO:0006350|GO:0006355|GO:0006355|GO:0006417|GO:0006417
BAbS19_I07490	Bacterial regulatory protein, MerR family	COG0789K	GO:0003700|GO:0005622|GO:0006355
BAbS19_I07500	Small multidrug resistance protein	COG2076P	GO:0016021
BAbS19_I07510	Bacterial sugar transferase	COG2148M	GO:0016740
BAbS19_I07520	Polysaccharide export protein	COG1596M	GO:0000004|GO:0005554|GO:0008372
BAbS19_I07530	hypothetical protein	COG0489D	GO:0000004|GO:0005554|GO:0008372
BAbS19_I07540	hypothetical protein	-	GO:0000004|GO:0005554|GO:0008372
BAbS19_I07550	Cytochrome oxidase assembly	COG1612O	GO:0000004|GO:0005554|GO:0008372
BAbS19_I07560	N-acetyl-gamma-glutamyl-phosphate reductase	COG0002E	GO:0003942|GO:0003942|GO:0003942|GO:0003942|GO:0005737|GO:0005737|GO:0006526|GO:0006526|GO:0006526|GO:0016491
BAbS19_I07570	Putative agmatinase:Arginase/agmatinase/formiminoglutamase	COG0010E	GO:0006596|GO:0008783|GO:0008783|GO:0016787|GO:0016813|GO:0030145|GO:0046872|GO:0046872
BAbS19_I07580	Ribosomal protein S9	COG0103J	GO:0003735|GO:0005622|GO:0005840|GO:0006412|GO:0030529
BAbS19_I07590	Ribosomal protein L13:Ribosomal protein L13, bacterial and organelle form	COG0102J	GO:0003735|GO:0003735|GO:0005622|GO:0005622|GO:0005840|GO:0005840|GO:0006412|GO:0006412|GO:0006412|GO:0030529
BAbS19_I07600	Phenylacetic acid degradation-related protein:Thioesterase superfamily	COG2050Q	GO:0000004|GO:0005554|GO:0008372
BAbS19_I07610	Cys/Met metabolism pyridoxal-phosphate-dependent enzyme:O-acetylhomoserine/O-acetylserine sulfhydrylase	COG2873E	GO:0003961|GO:0006520|GO:0006520|GO:0016740|GO:0016765
BAbS19_I07620	Hypothetical Membrane Spanning Protein	-	GO:0000004|GO:0005554|GO:0008372
BAbS19_I07630	hypothetical protein	-	GO:0000004|GO:0005554|GO:0008372
BAbS19_I07640	hypothetical protein	-	GO:0000004|GO:0005554|GO:0008372
BAbS19_I07650	hypothetical protein	-	GO:0000004|GO:0005554|GO:0008372
BAbS19_I07660	NADH-ubiquinone/plastoquinone oxidoreductase, chain 3	COG0838C	GO:0006120|GO:0008137|GO:0016021|GO:0016491|GO:0048038
BAbS19_I07670	NADH ubiquinone oxidoreductase domain, 20 kDa subunit:NADH dehydrogenase (ubiquinone), 20 kDa subunit	COG0377C	GO:0006120|GO:0008137|GO:0008137|GO:0016491
BAbS19_I07680	NADH dehydrogenase (ubiquinone), 30 kDa subunit	COG0852C	GO:0006118|GO:0006120|GO:0008137|GO:0008137|GO:0016491|GO:0016651
BAbS19_I07690	Pectinesterase:NADH-ubiquinone oxidoreductase, chain 49kDa	COG0649C	GO:0006118|GO:0008137|GO:0016491|GO:0016651
BAbS19_I07700	NADH dehydrogenase (ubiquinone), 24 kDa subunit	COG1905C	GO:0006120|GO:0008137|GO:0008137|GO:0016491
BAbS19_I07710	Respiratory-chain NADH dehydrogenase, 51 kDa subunit	COG1894C	GO:0005506|GO:0005506|GO:0006118|GO:0006120|GO:0008137|GO:0008137|GO:0010181|GO:0010181|GO:0016491|GO:0016651|GO:0051287
BAbS19_I07720	Respiratory-chain NADH dehydrogenase 75 kDa subunit:Ferredoxin:Molybdopterin oxidoreductase	COG1034C	GO:0005506|GO:0005506|GO:0006118|GO:0006120|GO:0008137|GO:0008137|GO:0009055|GO:0016491|GO:0016651
BAbS19_I07730	Tetracycline resistance protein TetB:Respiratory-chain NADH dehydrogenase, subunit 1	COG1005C	GO:0006118|GO:0006118|GO:0016020|GO:0016020|GO:0016020|GO:0016021|GO:0016491|GO:0048038|GO:0050136
BAbS19_I07740	7Fe ferredoxin:3Fe-4S ferredoxin:4Fe-4S ferredoxin, iron-sulfur binding domain	COG1143C	GO:0005506|GO:0005506|GO:0005506|GO:0005506|GO:0006118|GO:0006118|GO:0006118|GO:0009055|GO:0016020|GO:0016020|GO:0016491|GO:0016651|GO:0019684|GO:0046872|GO:0048038|GO:0050136|GO:0051536|GO:0051539
BAbS19_I07750	Photosynthetic reaction centre protein:NADH-ubiquinone/plastoquinone oxidoreductase, chain 6	COG0839C	GO:0008137|GO:0016491
BAbS19_I07760	NADH-ubiquinone oxidoreductase, chain 4L:Mitochodrial NADH-ubiquinone oxidoreductase, chain 4L:NADH dehydrogenase (ubiquinone...	COG0713C	GO:0006120|GO:0006120|GO:0006120|GO:0008137|GO:0008137|GO:0008137|GO:0008137|GO:0016491
BAbS19_I07770	NADH-Ubiquinone oxidoreductase (complex I), chain 5/L, N-terminal:NADH/Ubiquinone/plastoquinone (complex I):NADH-ubiquinone o...	COG1008C	GO:0008137|GO:0008137|GO:0008137|GO:0016020|GO:0016021|GO:0016491|GO:0042773|GO:0042773
BAbS19_I07780	NADH/Ubiquinone/plastoquinone (complex I):NADH-ubiquinone oxidoreductase, chain 4	COG1008C	GO:0008137|GO:0008137|GO:0008137|GO:0016491|GO:0042773|GO:0042773
BAbS19_I07790	NADH/Ubiquinone/plastoquinone (complex I):NADH-ubiquinone oxidoreductase, chain 5:NADH-ubiquinone oxidoreductase, chain 2	COG1007C	GO:0008137|GO:0008137|GO:0008137|GO:0016491|GO:0042773|GO:0042773
BAbS19_I07800	Biotin protein ligase, C-terminal:Biotin/lipoate A/B protein ligase domain:Biotin--acetyl-CoA-carboxylase ligase	COG0340H	GO:0004077|GO:0004077|GO:0006464|GO:0016874
BAbS19_I07810	Beta-lactamase-like	COG0595R	GO:0000004|GO:0005554|GO:0008372
BAbS19_I07820	Glyoxalase/Bleomycin resistance protein/dioxygenase domain	COG0346E	GO:0004462|GO:0016702|GO:0016829
BAbS19_I07830	hypothetical protein	COG5454S	GO:0000004|GO:0005554|GO:0008372
BAbS19_I07840	tRNA synthetase, class-II (G, H, P and S):Prolyl-tRNA synthetase, class IIa:Anticodon binding domain:Prolyl-tRNA synthetase,...	COG0442J	GO:0000166|GO:0004812|GO:0004812|GO:0004812|GO:0004827|GO:0004827|GO:0004827|GO:0004827|GO:0005524|GO:0005524|GO:0005524|GO:0005524|GO:0005524|GO:0005524|GO:0005737|GO:0006412|GO:0006412|GO:0006412|GO:0006418|GO:0006433|GO:0006433|GO:0016874
BAbS19_I07850	Bacterial general secretion pathway protein H:Protein of unknown function DUF214	COG4591M	GO:0006810|GO:0009276|GO:0016021
BAbS19_I07860	ATP/GTP-binding site motif A (P-loop):ABC transporter:AAA ATPase	COG1136V	GO:0000166|GO:0000166|GO:0005524|GO:0005524|GO:0006810|GO:0016020|GO:0016020|GO:0016787|GO:0016887|GO:0017111
BAbS19_I07870	Phosphoesterase PHP, N-terminal:PHP domain C-terminal region:OB-fold nucleic acid binding domain:DNA polymerase III alpha sub...	COG0587L	GO:0003677|GO:0003887|GO:0003887|GO:0003887|GO:0003889|GO:0005737|GO:0006260|GO:0006260|GO:0006260|GO:0008408|GO:0016740|GO:0016779
BAbS19_I07880	hypothetical protein	-	GO:0000004|GO:0005554|GO:0008372
BAbS19_I07890	hypothetical protein	-	GO:0000004|GO:0005554|GO:0008372
BAbS19_I07930	Ribosomal protein S4:RNA-binding S4:Ribosomal protein S4, bacterial and organelle form	COG0522J	GO:0003723|GO:0003723|GO:0003735|GO:0003735|GO:0005622|GO:0005840|GO:0006412|GO:0006412|GO:0006412|GO:0015935|GO:0019843|GO:0019843|GO:0030529
BAbS19_I07940	hypothetical protein	COG0037D	GO:0000004|GO:0005554|GO:0008372
BAbS19_I07950	Inositol phosphatase/fructose-1,6-bisphosphatase:Inositol monophosphatase	COG0483G	GO:0004437
BAbS19_I07960	drug resistance transporter, Bcr/CflA family	-	GO:0005215|GO:0005215|GO:0006810|GO:0006810|GO:0006810|GO:0016020|GO:0016020|GO:0016021|GO:0016021|GO:0016021
BAbS19_I07970	Glutaredoxin:Glutaredoxin-related protein	COG0278O	GO:0006118|GO:0006810
BAbS19_I07980	ATP/GTP-binding site motif A (P-loop):BolA-like protein	COG0271T	GO:0000004|GO:0005554|GO:0008372
BAbS19_I07990	AIR synthase related protein	COG0046F	GO:0000166|GO:0004642|GO:0004642|GO:0004642|GO:0005524|GO:0005524|GO:0005737|GO:0006164|GO:0006164|GO:0006189|GO:0016874
BAbS19_I08000	lipoprotein, putative	-	GO:0000004|GO:0005554|GO:0008372
BAbS19_I08010	Glutathione S-transferase, N-terminal:Glutathione S-transferase, C-terminal	COG0625O	GO:0016740
BAbS19_I08020	phosphoribosylformylglycinamidine synthase	COG0047F	GO:0004642|GO:0004642|GO:0004642|GO:0005737|GO:0006164|GO:0006164|GO:0006189|GO:0006541|GO:0016874
BAbS19_I08030	phosphoribosylformylglycinamidine synthase	COG1828F	GO:0000004|GO:0005554|GO:0008372
BAbS19_I08040	SAICAR synthetase	COG0152F	GO:0003824|GO:0004639|GO:0004639|GO:0005524|GO:0006164|GO:0016874
BAbS19_I08050	hypothetical protein	COG5467S	GO:0000004|GO:0005554|GO:0008372
BAbS19_I08060	HpcH/HpaI aldolase	COG3836G	GO:0000004|GO:0005554|GO:0008372
BAbS19_I08070	hypothetical protein	COG3545R	GO:0000004|GO:0005554|GO:0008372
BAbS19_I08080	BIPHENYL-2,3-DIOL 1,2-DIOXYGENASE III	COG2514R	GO:0018583
BAbS19_I08090	Fumarate lyase:Delta crystallin:Adenylosuccinate lyase	COG0015F	GO:0003824|GO:0004018|GO:0004018|GO:0009152|GO:0016829
BAbS19_I08100	Ribulose-phosphate 3-epimerase	COG0036G	GO:0003824|GO:0004750|GO:0004750|GO:0005975|GO:0008152|GO:0016853
BAbS19_I08110	Bacterial lipid A biosynthesis acyltransferase	COG1560M	GO:0008415|GO:0008415|GO:0009244|GO:0016021|GO:0016740
BAbS19_I08120	Zinc-containing alcohol dehydrogenase superfamily:Glucose/ribitol dehydrogenase	COG0603R	GO:0004022|GO:0008270|GO:0016491|GO:0016491
BAbS19_I08130	Beta-ketoacyl synthase:ATP/GTP-binding site motif A (P-loop)	COG0303H	GO:0003824|GO:0004315|GO:0006633|GO:0008415|GO:0016740
BAbS19_I08140	Beta-ketoacyl synthase	COG0303H	GO:0003824|GO:0006633
BAbS19_I08150	Acyl carrier protein (ACP):Phosphopantetheine attachment site:Phosphopantetheine-binding domain	COG0235G	GO:0000036|GO:0006633|GO:0031177|GO:0048037
BAbS19_I08160	hypothetical protein	COG3926R	GO:0000004|GO:0005554|GO:0008372
BAbS19_I08170	Aldose 1-epimerase	COG2017G	GO:0004034|GO:0016853
BAbS19_I08180	2-DEHYDRO-3-DEOXYGLUCONOKINASE	COG0524G	GO:0008673
BAbS19_I08190	hypothetical protein	-	GO:0000004|GO:0005554|GO:0008372
BAbS19_I08200	Amidohydrolase	COG3454P	GO:0016787
BAbS19_I08210	Haloacid dehalogenase/epoxide hydrolase:Haloacid dehalogenase-like hydrolase:HAD-superfamily hydrolase, subfamily IIB:HAD-sup...	COG0637R	GO:0008152|GO:0008967|GO:0016787
BAbS19_I08220	Solute-binding protein/glutamate receptor:Ionotropic glutamate receptor:Bacterial extracellular solute-binding protein, family 3	COG0833E	GO:0004872|GO:0005215|GO:0006810|GO:0030288
BAbS19_I08230	TIM-barrel protein, yjbN family	COG0042J	GO:0003824|GO:0008033|GO:0008033|GO:0008152|GO:0016491|GO:0016491|GO:0050660|GO:0050660
BAbS19_I08240	Eukaryotic/viral aspartic protease, active site	COG3577R	GO:0008233
BAbS19_I08250	hypothetical protein	COG3313R	GO:0000004|GO:0005554|GO:0008372
BAbS19_I08260	Cobalamin-5-phosphate synthase CobS	COG0368H	GO:0008818|GO:0009236|GO:0016740
BAbS19_I08270	Nicotinate-nucleotide-dimethylbenzimidazole phosphoribosyltransferase	COG2038H	GO:0008939|GO:0008939|GO:0008939|GO:0009236|GO:0009236|GO:0016740|GO:0016757
BAbS19_I08280	Bacterial regulatory proteins, AsnC family	COG1522K	GO:0003677|GO:0003700|GO:0005622|GO:0006350|GO:0006355|GO:0006355|GO:0043565
BAbS19_I08290	hypothetical protein	COG1573L	GO:0000004|GO:0005554|GO:0008372
BAbS19_I08300	nuclease domain protein	COG1525L	GO:0003676
BAbS19_I08310	Sel1-like repeat	COG0790R	GO:0005488
BAbS19_I08320	EXODEOXYRIBONUCLEASE III	COG0708L	GO:0004518|GO:0004519|GO:0006281|GO:0006281|GO:0008853
BAbS19_I08330	Protein of unknown function DUF533	COG2979S	GO:0000004|GO:0005554|GO:0008372
BAbS19_I08340	Protein of unknown function, HesB/YadR/YfhF	COG0316S	GO:0000004|GO:0005554|GO:0008372
BAbS19_I08350	Metal dependent phosphohydrolase, HD region:Deoxyguanosinetriphosphate triphosphohydrolase:Metal-dependent phosphohydrolase, ...	COG0232F	GO:0000287|GO:0003824|GO:0008832|GO:0008832|GO:0016787|GO:0046039
BAbS19_I08360	Arginyl-tRNA synthetase, class Ic:Aminoacyl-tRNA synthetase, class I:Arginyl tRNA synthetase N-terminal domain	COG0018J	GO:0000166|GO:0004812|GO:0004812|GO:0004814|GO:0004814|GO:0004814|GO:0005524|GO:0005524|GO:0005524|GO:0005524|GO:0006412|GO:0006418|GO:0006420|GO:0006420|GO:0016874
BAbS19_I08370	Antifreeze protein, type I	-	GO:0000004|GO:0005554|GO:0008372
BAbS19_I08380	Glycoside hydrolase, family 3, N-terminal	COG1472G	GO:0004563|GO:0008152|GO:0016787|GO:0016798
BAbS19_I08390	Hypothetical Cytosolic Protein	COG1354S	GO:0000004|GO:0005554|GO:0008372
BAbS19_I08400	Conserved hypothetical protein 281	COG1386K	GO:0000004|GO:0005554|GO:0008372
BAbS19_I08410	Bacterial sec-independent translocation protein mttA/Hcf106:Twin-arginine translocation protein TatB:Twin-arginine translocat...	COG1826U	GO:0015031|GO:0016021
BAbS19_I08420	Proline-rich region:Proline-rich extensin:Bacterial sec-independent translocation protein mttA/Hcf106:Treacher Collins syndro...	COG1826U	GO:0009306|GO:0015450|GO:0016020
BAbS19_I08430	Sec-independent periplasmic protein translocase	COG0805U	GO:0000004|GO:0005554|GO:0008372
BAbS19_I08440	tRNA synthetase, class-II (G, H, P and S):Seryl-tRNA synthetase, class IIa:Aminoacyl-transfer RNA synthetase, class II	COG0172J	GO:0000166|GO:0004812|GO:0004812|GO:0004828|GO:0004828|GO:0005524|GO:0005524|GO:0005524|GO:0006412|GO:0006418|GO:0006434|GO:0016874
BAbS19_I08450	Survival protein SurE	COG0496R	GO:0000166|GO:0008253|GO:0008253|GO:0016787|GO:0046872|GO:0046872
BAbS19_I08460	protein-L-isoaspartate O-methyltransferase	COG2518O	GO:0004719|GO:0006464|GO:0008168|GO:0016740
BAbS19_I08470	Peptidoglycan-binding LysM:Peptidase M23/M37	COG0739M	GO:0004222|GO:0006508|GO:0016998
BAbS19_I08480	ATP/GTP-binding site motif A (P-loop)	COG2607R	GO:0000004|GO:0005554|GO:0008372
BAbS19_I08490	YajC	COG1862U	GO:0016020|GO:0016021
BAbS19_I08500	Vacuolar H+-transporting two-sector ATPase, C subunit:Rhodopsin-like GPCR superfamily:Regulator of chromosome condensation, R...	COG0342U	GO:0006605|GO:0006810|GO:0006886|GO:0006886|GO:0008565|GO:0009276|GO:0009276|GO:0015031|GO:0015450|GO:0015450|GO:0015627|GO:0015628|GO:0016020|GO:0016020|GO:0016021
BAbS19_I08510	Hypothetical Cytosolic Protein	COG3737S	GO:0000004|GO:0005554|GO:0008372
BAbS19_I08520	hypothetical protein	COG1562I	GO:0000004|GO:0005554|GO:0008372
BAbS19_I08530	Pyridine nucleotide-disulphide oxidoreductase, class I:FAD-dependent pyridine nucleotide-disulphide oxidoreductase:Glucose-in...	COG1206J	GO:0006118|GO:0008033|GO:0016491|GO:0050660
BAbS19_I08540	hypothetical protein	COG5457S	GO:0000004|GO:0005554|GO:0008372
BAbS19_I08550	hypothetical protein	COG4872S	GO:0000004|GO:0005554|GO:0008372
BAbS19_I08560	hypothetical protein	COG4929S	GO:0000004|GO:0005554|GO:0008372
BAbS19_I08570	Peptidylprolyl isomerase, FKBP-type:Protein prenyltransferase, alpha subunit:Trigger factor	COG0544O	GO:0003755|GO:0003755|GO:0006457|GO:0006457|GO:0006457|GO:0006457|GO:0007049|GO:0015031|GO:0015031|GO:0016853|GO:0051301
BAbS19_I08580	GatB/Yqey:Glutamyl-tRNA(Gln) amidotransferase B subunit:GatB N-terminal region:GatB central domain	COG0064J	GO:0006412|GO:0006412|GO:0006412|GO:0016874|GO:0017068|GO:0017068
BAbS19_I08590	GCN5-related N-acetyltransferase	COG0452H	GO:0008080|GO:0008152|GO:0016740
BAbS19_I08600	NADH:ubiquinone oxidoreductase 17.2 kD subunit	COG3761C	GO:0006118|GO:0008137|GO:0009055|GO:0016020
BAbS19_I08610	hypothetical protein	-	GO:0000004|GO:0005554|GO:0008372
BAbS19_I08620	hypothetical protein	COG4765S	GO:0000004|GO:0005554|GO:0008372
BAbS19_I08630	Aat, leucyl/phenylalanyl-tRNA--protein transferase	COG2360O	GO:0008415|GO:0008914|GO:0008914|GO:0016740|GO:0016755|GO:0030163|GO:0030163
BAbS19_I08640	Acetyl-CoA carboxylase, biotin carboxylase:Carbamoyl-phosphate synthase L chain, ATP-binding:Carbamoyl-phosphate synthetase l...	COG0439I	GO:0000166|GO:0003824|GO:0003824|GO:0003824|GO:0004075|GO:0005524|GO:0005524|GO:0005524|GO:0005524|GO:0005524|GO:0005524|GO:0006633|GO:0008610|GO:0009374|GO:0016874|GO:0016874|GO:0016874
BAbS19_I08650	Biotin/lipoyl attachment:Acetyl-CoA biotin carboxyl carrier:Biotin-requiring enzyme, attachment site	COG0511I	GO:0003989|GO:0006633|GO:0009317|GO:0009374
BAbS19_I08660	Dehydroquinase, class II	COG0757E	GO:0003855|GO:0003855|GO:0003855|GO:0008652|GO:0009073|GO:0009073|GO:0016089|GO:0016829
BAbS19_I08670	DSBA oxidoreductase	COG1651O	GO:0042597
BAbS19_I08680	ZINC METALLOPROTEASE	COG4783R	GO:0005488
BAbS19_I08690	1-aminocyclopropane-1-carboxylate synthase:Aminotransferase, class I and II	COG0436E	GO:0004069|GO:0008483|GO:0009058|GO:0016740|GO:0016847
BAbS19_I08700	Ribonuclease E and G	COG1530J	GO:0003676|GO:0003723|GO:0004540|GO:0005737|GO:0006396|GO:0008270|GO:0016787
BAbS19_I08710	Cell wall hydrolase/autolysin	COG0860M	GO:0008745|GO:0008745|GO:0009253|GO:0016787
BAbS19_I08720	Glycosyl transferase, family 51:Penicillin-binding protein, transpeptidase domain	COG5009M	GO:0003824|GO:0008233|GO:0009252|GO:0009252|GO:0009274|GO:0016740|GO:0016757|GO:0016763|GO:0046677
BAbS19_I08730	Class I peptide chain release factor domain:Peptide chain release factor 2:PCRF domain	COG1186J	GO:0003747|GO:0005737|GO:0005737|GO:0006415|GO:0006415|GO:0006415|GO:0016149|GO:0016149
BAbS19_I08740	hypothetical protein	-	GO:0000004|GO:0005554|GO:0008372
BAbS19_I08750	TRANSPOSASE	-	GO:0000004|GO:0005554|GO:0008372
BAbS19_I08760	Transposase, IS4	COG3293L	GO:0000004|GO:0005554|GO:0008372
BAbS19_I08770	hypothetical protein	-	GO:0000004|GO:0005554|GO:0008372
BAbS19_I08780	hypothetical protein	-	GO:0000004|GO:0005554|GO:0008372
BAbS19_I08790	Protein of unknown function DUF455	COG2833S	GO:0016491|GO:0046914
BAbS19_I08800	Alkyl hydroperoxide reductase/ Thiol specific antioxidant/ Mal allergen	COG1225O	GO:0000004|GO:0005554|GO:0008372
BAbS19_I08810	RNA-binding region RNP-1 (RNA recognition motif)	-	GO:0000004|GO:0005554|GO:0008372
BAbS19_I08820	Aminoacyl-tRNA synthetase, class I:Aminoacyl-tRNA synthetase, class Ib:Tyrosyl-tRNA synthetase, class Ib:RNA-binding S4	COG0162J	GO:0000166|GO:0003723|GO:0003723|GO:0004812|GO:0004812|GO:0004831|GO:0004831|GO:0004831|GO:0005524|GO:0005524|GO:0005524|GO:0005524|GO:0006412|GO:0006418|GO:0006437|GO:0006437|GO:0016874
BAbS19_I08830	hypothetical protein	COG2377O	GO:0000166|GO:0005524|GO:0005524|GO:0005975|GO:0006040|GO:0009254|GO:0016301|GO:0016740|GO:0016773
BAbS19_I08840	Small multidrug resistance protein	COG2076P	GO:0016021
BAbS19_I08850	Esterase/lipase/thioesterase, active site	COG2945R	GO:0000004|GO:0005554|GO:0008372
BAbS19_I08860	Aminotransferase, class V	COG1104E	GO:0008483|GO:0016740
BAbS19_I08870	hypothetical protein	COG0719O	GO:0000004|GO:0005554|GO:0008372
BAbS19_I08880	ATP/GTP-binding site motif A (P-loop):ABC transporter:AAA ATPase	COG0396O	GO:0000166|GO:0000166|GO:0005524|GO:0005524|GO:0005524|GO:0006810|GO:0016020|GO:0016020|GO:0016887|GO:0017111
BAbS19_I08890	hypothetical protein	COG0719O	GO:0000004|GO:0005554|GO:0008372
BAbS19_I08900	Aminotransferase, class V	COG0520E	GO:0006534|GO:0008483|GO:0016740|GO:0016829|GO:0030170|GO:0031071
BAbS19_I08910	Protein of unknown function DUF59	COG2151R	GO:0000004|GO:0005554|GO:0008372
BAbS19_I08920	Glycosyl transferase, family 2	COG0463M	GO:0016740
BAbS19_I08930	ATP-NAD kinase	COG0061G	GO:0003951|GO:0016301|GO:0016740
BAbS19_I08940	ATP-dependent helicase, DEAD-box:DEAD/DEAH box helicase:Helicase, C-terminal:ATP/GTP-binding site motif A (P-loop)	COG0511I	GO:0000166|GO:0003676|GO:0003676|GO:0004386|GO:0004386|GO:0005524|GO:0005524|GO:0005524|GO:0008026|GO:0016787
BAbS19_I08950	HESB PROTEIN	COG0316S	GO:0000004|GO:0005554|GO:0008372
BAbS19_I08960	hypothetical protein	-	GO:0000004|GO:0005554|GO:0008372
BAbS19_I08970	hypothetical protein	-	GO:0000004|GO:0005554|GO:0008372
BAbS19_I08980	Heavy metal transport/detoxification protein:Heavy metal binding	COG2608P	GO:0030001|GO:0046872
BAbS19_I08990	SAM (and some other nucleotide) binding motif:Protein-L-isoaspartate(D-aspartate) O-methyltransferase:Site-specific DNA-methy...	COG2518O	GO:0004719|GO:0004719|GO:0006464|GO:0008168|GO:0016740
BAbS19_I09000	Outer membrane efflux protein	COG1537R	GO:0015031|GO:0019867
BAbS19_I09010	hypothetical protein	COG3827S	GO:0000004|GO:0005554|GO:0008372
BAbS19_I09020	Aminoacyl-tRNA synthetase, class I:Aminoacyl-tRNA synthetase, class Ia:Valyl-tRNA synthetase, class Ia	COG0525J	GO:0000166|GO:0004812|GO:0004812|GO:0004832|GO:0004832|GO:0005524|GO:0005524|GO:0005524|GO:0006412|GO:0006418|GO:0006438|GO:0016874
BAbS19_I09030	Membrane protein involved in aromatic hydrocarbon degradation	COG2067I	GO:0000004|GO:0005554|GO:0008372
BAbS19_I09060	ARGININE/ORNITHINE-BINDING PERIPLASMIC PROTEIN PRECURSOR	COG0833E	GO:0000004|GO:0005554|GO:0008372
BAbS19_I09070	Rhodopsin-like GPCR superfamily	COG1763H	GO:0005525|GO:0005525|GO:0006777|GO:0006777
BAbS19_I09080	molybdopterin-guanine dinucleotide biosynthesis protein A	COG0746H	GO:0003824|GO:0006777
BAbS19_I09090	MoaA/nifB/pqqE family:Elongator protein 3/MiaB/NifB:Radical SAM	COG2896H	GO:0000166|GO:0003824|GO:0003824|GO:0005506|GO:0005506|GO:0005525|GO:0006777|GO:0006777|GO:0008152|GO:0046872|GO:0046872|GO:0046872|GO:0051536|GO:0051539
BAbS19_I09100	hypothetical protein	COG3536S	GO:0000004|GO:0005554|GO:0008372
BAbS19_I09110	SALICYLATE HYDROXYLASE	COG0653U	GO:0006118|GO:0008152|GO:0016491|GO:0018658
BAbS19_I09120	Fumarate lyase:Fe-S type hydro-lyase tartrate/fumarate alpha region:Fe-S type hydro-lyase tartrate/fumarate beta region	COG1951C	GO:0004333|GO:0004333|GO:0006091|GO:0016829|GO:0016829|GO:0016829
BAbS19_I09150	Transglycosylase-associated protein	COG2261S	GO:0000004|GO:0005554|GO:0008372
BAbS19_I09160	Phage integrase	COG0582L	GO:0003677|GO:0003677|GO:0006310|GO:0015074
BAbS19_I09170	hypothetical protein	-	GO:0000004|GO:0005554|GO:0008372
BAbS19_I09180	hypothetical protein	-	GO:0000004|GO:0005554|GO:0008372
BAbS19_I09190	hypothetical protein	-	GO:0000004|GO:0005554|GO:0008372
BAbS19_I09200	hypothetical protein	-	GO:0000004|GO:0005554|GO:0008372
BAbS19_I09210	outer membrane protein, putative	COG3637M	GO:0000004|GO:0005554|GO:0008372
BAbS19_I09220	hypothetical protein	COG3514S	GO:0000004|GO:0005554|GO:0008372
BAbS19_I09230	hypothetical protein	COG2929S	GO:0000004|GO:0005554|GO:0008372
BAbS19_I09240	Queuine/other tRNA-ribosyltransferase:Queuine tRNA-ribosyltransferase	COG0343J	GO:0006400|GO:0008033|GO:0008270|GO:0008479|GO:0008479|GO:0008479|GO:0008616|GO:0008616|GO:0008616|GO:0016740|GO:0016757
BAbS19_I09250	TRANSPOSASE	-	GO:0000004|GO:0005554|GO:0008372
BAbS19_I09260	IS711, transposase orfB	COG3293L	GO:0000004|GO:0005554|GO:0008372
BAbS19_I09290	hypothetical protein	-	GO:0000004|GO:0005554|GO:0008372
BAbS19_I09300	glycosyltransferase	COG0438M	GO:0016740
BAbS19_I09310	Glycosyl transferase, group 1	COG0438M	GO:0016740|GO:0016757
BAbS19_I09320	SECRETION ACTIVATOR PROTEIN	COG3926R	GO:0000004|GO:0005554|GO:0008372
BAbS19_I09330	hypothetical protein	-	GO:0000004|GO:0005554|GO:0008372
BAbS19_I09340	hypothetical protein	-	GO:0000004|GO:0005554|GO:0008372
BAbS19_I09350	Arsenate reductase:Arsenate reductase and related	COG1393P	GO:0006118|GO:0008794|GO:0016491|GO:0046685
BAbS19_I09360	Rare lipoprotein A	COG0797M	GO:0000004|GO:0005554|GO:0008372
BAbS19_I09370	D-alanyl-D-alanine carboxypeptidase 1, S11 family	COG1686M	GO:0004180|GO:0006508|GO:0009002|GO:0009002|GO:0016787
BAbS19_I09380	THYMIDYLATE KINASE	COG0125F	GO:0000166|GO:0004798|GO:0004798|GO:0004798|GO:0005524|GO:0005524|GO:0005524|GO:0006233|GO:0006235|GO:0006235|GO:0009165|GO:0016301|GO:0016740
BAbS19_I09390	Replication factor C conserved domain	COG0470L	GO:0003887|GO:0003887|GO:0006260|GO:0008408|GO:0016740|GO:0016779
BAbS19_I09400	Aminoacyl-tRNA synthetase, class I:Aminoacyl-tRNA synthetase, class Ia:Methionyl-tRNA synthetase, class Ia	COG0143J	GO:0000166|GO:0004812|GO:0004825|GO:0004825|GO:0005524|GO:0005524|GO:0006412|GO:0006431|GO:0016874
BAbS19_I09410	SEC-INDEPENDENT PROTEIN TATD	COG0084L	GO:0000004|GO:0005554|GO:0008372
BAbS19_I09420	Beta-lactamase-like	COG1235R	GO:0000004|GO:0005554|GO:0008372
BAbS19_I09430	Uridine kinase:ABC transporter, transmembrane region:ATP/GTP-binding site motif A (P-loop):ABC transporter:AAA ATPase:Glucan ...	COG1132V	GO:0000166|GO:0000166|GO:0005215|GO:0005524|GO:0005524|GO:0005524|GO:0006810|GO:0006810|GO:0016020|GO:0016021|GO:0016021|GO:0016301|GO:0016887|GO:0017111|GO:0042626
BAbS19_I09440	RNA-binding S4:Pseudouridine synthase:Pseudouridine synthase, Rlu:Pseudouridine synthase, RluD	COG0564J	GO:0003723|GO:0003723|GO:0003723|GO:0004730|GO:0004730|GO:0004730|GO:0006364|GO:0006396|GO:0009982|GO:0016829|GO:0016853
BAbS19_I09450	Protein of unknown function DUF6	COG0696G	GO:0000004|GO:0005554|GO:0008372
BAbS19_I09460	Haloacid dehalogenase-like hydrolase:HAD-superfamily hydrolase, subfamily IA, variant 3:HAD-superfamily hydrolase, subfamily ...	COG0546R	GO:0008152|GO:0008967|GO:0008967|GO:0016787
BAbS19_I09470	Beta tubulin	COG5387O	GO:0000004|GO:0005554|GO:0008372
BAbS19_I09480	Glutamine synthetase class-I, adenylation site:Glutamine synthetase type I:Glutamine synthetase, catalytic domain:Glutamine s...	COG0174E	GO:0003824|GO:0004356|GO:0004356|GO:0004356|GO:0004356|GO:0004356|GO:0005737|GO:0006542|GO:0006807|GO:0006807|GO:0006807|GO:0009399|GO:0016874
BAbS19_I09490	Nitrogen regulatory protein P-II:P-II protein urydylation site	COG0347E	GO:0006350|GO:0006355|GO:0006808|GO:0030234
BAbS19_I09500	YjeF family protein	COG0063G	GO:0000004|GO:0005554|GO:0008372
BAbS19_I09510	hypothetical protein	-	GO:0000004|GO:0005554|GO:0008372
BAbS19_I09520	Haloacid dehalogenase/epoxide hydrolase:Haloacid dehalogenase-like hydrolase:2-phosphoglycolate phosphatase, prokaryotic:HAD-...	COG0546R	GO:0005975|GO:0008152|GO:0008152|GO:0008967|GO:0008967|GO:0008967|GO:0016787|GO:0016787
BAbS19_I09530	hypothetical protein	-	GO:0000004|GO:0005554|GO:0008372
BAbS19_I09540	ribose-5-phosphate isomerase A	COG0120G	GO:0004751|GO:0009052|GO:0016853
BAbS19_I09550	hypothetical protein	COG3184S	GO:0000004|GO:0005554|GO:0008372
BAbS19_I09560	Pyridine nucleotide-disulphide oxidoreductase, class-II:Mercuric reductase:ATP-dependent DNA ligase:Pyridine nucleotide-disul...	COG1249C	GO:0004362|GO:0004362|GO:0005737|GO:0006118|GO:0006118|GO:0006118|GO:0006749|GO:0015036|GO:0015036|GO:0016491|GO:0016491|GO:0016491|GO:0016874|GO:0045454|GO:0050660|GO:0050661
BAbS19_I09570	Aminoacyl-tRNA synthetase, class I:DAHP synthetase, classII	COG3200E	GO:0003849|GO:0003849|GO:0004812|GO:0009073|GO:0016740
BAbS19_I09580	Prokaryotic diacylglycerol kinase	COG0818M	GO:0004143|GO:0004143|GO:0008654|GO:0016020|GO:0016301|GO:0016740
BAbS19_I09590	NAD(+) synthase	COG0171H	GO:0000166|GO:0003952|GO:0003952|GO:0005524|GO:0005524|GO:0006807|GO:0009435|GO:0016810|GO:0016874
BAbS19_I09600	Glutamyl-tRNA synthetase, class Ic:Aminoacyl-tRNA synthetase, class I:Glutamyl-tRNA synthetase bacterial/mitochondrial	COG0008J	GO:0000166|GO:0004812|GO:0004812|GO:0004812|GO:0004818|GO:0004818|GO:0004818|GO:0004818|GO:0005524|GO:0005524|GO:0005524|GO:0005524|GO:0005524|GO:0005524|GO:0005737|GO:0006412|GO:0006412|GO:0006418|GO:0006424|GO:0006424|GO:0006424|GO:0016874|GO:0017101
BAbS19_I09610	Proline-rich extensin	-	GO:0000004|GO:0005554|GO:0008372
BAbS19_I09620	Malic oxidoreductase:Phosphate acetyl/butaryl transferase	COG0281C	GO:0004471|GO:0016491|GO:0016616|GO:0016740|GO:0046872
BAbS19_I09630	Mandelate racemase/muconate lactonizing enzyme	COG4947S	GO:0003824|GO:0008152
BAbS19_I09640	Sulfate transporter/antisigma-factor antagonist STAS:Protein of unknown function DUF140	COG0767Q	GO:0000004|GO:0005554|GO:0008372
BAbS19_I09650	ABC TRANSPORTER ATP-BINDING PROTEIN	COG1127Q	GO:0000166|GO:0000166|GO:0005524|GO:0005524|GO:0016020|GO:0016020|GO:0016887|GO:0017111
BAbS19_I09660	ABC transporter, periplasmic substrate-binding protein	COG1463Q	GO:0000004|GO:0005554|GO:0008372
BAbS19_I09670	Protein of unknown function DUF330	COG3218R	GO:0000004|GO:0005554|GO:0008372
BAbS19_I09680	hypothetical protein	-	GO:0000004|GO:0005554|GO:0008372
BAbS19_I09690	hypothetical protein	-	GO:0000004|GO:0005554|GO:0008372
BAbS19_I09700	Cytochrome c heme-binding site:Ferredoxin:Adrenodoxin	COG0633C	GO:0005506|GO:0005506|GO:0005506|GO:0005506|GO:0006118|GO:0006118|GO:0006118|GO:0006810|GO:0009055|GO:0009055|GO:0046872|GO:0051536
BAbS19_I09710	THIOREDOXIN REDUCTASE	COG0492O	GO:0000004|GO:0005554|GO:0008372
BAbS19_I09720	hypothetical protein	COG5661O	GO:0000004|GO:0005554|GO:0008372
BAbS19_I09730	Dihydropteroate synthase, DHPS:Dihydropteroate synthase	COG0294H	GO:0004156|GO:0004156|GO:0004156|GO:0009396|GO:0009396|GO:0016740
BAbS19_I09740	Dihydroneopterin aldolase family:Dihydroneopterin aldolase	COG1539H	GO:0004150|GO:0004150|GO:0004150|GO:0006760|GO:0006760|GO:0016829
BAbS19_I09750	7,8-Dihydro-6-hydroxymethylpterin-pyrophosphokina se, HPPK	COG0801H	GO:0003848|GO:0003848|GO:0009396|GO:0016740
BAbS19_I09760	hypothetical protein	-	GO:0000004|GO:0005554|GO:0008372
BAbS19_I09770	Conserved hypothetical protein 1620	COG3768S	GO:0000004|GO:0005554|GO:0008372
BAbS19_I09780	ATP/GTP-binding site motif A (P-loop):YcjX-like protein	COG3106R	GO:0000004|GO:0005554|GO:0008372
BAbS19_I09790	hypothetical protein	COG2062T	GO:0000004|GO:0005554|GO:0008372
BAbS19_I09800	Zn-finger, prokaryotic DksA/TraR C4 type	COG1734T	GO:0008270|GO:0008270
BAbS19_I09810	Proline-rich region:Proline-rich extensin	-	GO:0000004|GO:0005554|GO:0008372
BAbS19_I09820	sensory box histidine kinase/response regulator	COG2202T	GO:0000155|GO:0000156|GO:0000160|GO:0004673|GO:0004871|GO:0005524|GO:0006355|GO:0007165|GO:0007165|GO:0016020|GO:0016301|GO:0016310|GO:0016772|GO:0018106
BAbS19_I09830	NAD binding site:Adrenodoxin reductase:Pyridine nucleotide-disulphide oxidoreductase, class I:FAD-dependent pyridine nucleoti...	COG2081R	GO:0006118|GO:0016491
BAbS19_I09840	Beta-lactamase	COG1680V	GO:0000004|GO:0005554|GO:0008372
BAbS19_I09850	Mechanosensitive (MS) ion channel	COG0668M	GO:0000004|GO:0005554|GO:0008372
BAbS19_I09860	Ribonucleotide reductase large subunit	COG0209F	GO:0004748|GO:0004748|GO:0005971|GO:0006260|GO:0016491|GO:0016960
BAbS19_I09870	NUDIX hydrolase	COG0492O	GO:0016787|GO:0016787
BAbS19_I09880	Phosphoribosyltransferase	COG0503F	GO:0000287|GO:0000287|GO:0000310|GO:0000310|GO:0006166|GO:0006166|GO:0016740|GO:0016757|GO:0046872
BAbS19_I09890	Universal stress protein (Usp)	COG0589T	GO:0000004|GO:0005554|GO:0008372
BAbS19_I09900	Molybdenum cofactor biosynthesis protein	COG1058R	GO:0006777
BAbS19_I09910	Flavodoxin	COG0655R	GO:0010181|GO:0010181|GO:0016481|GO:0016491
BAbS19_I09920	hypothetical protein	-	GO:0000004|GO:0005554|GO:0008372
BAbS19_I09930	threonine dehydratase	COG1171E	GO:0004794|GO:0006520|GO:0009097|GO:0030170
BAbS19_I09940	ATP-dependent helicase, DEAD-box:DEAD/DEAH box helicase:Helicase, C-terminal:ATP/GTP-binding site motif A (P-loop)	COG0511I	GO:0000166|GO:0003676|GO:0003676|GO:0004386|GO:0004386|GO:0005524|GO:0005524|GO:0005524|GO:0008026|GO:0016787
BAbS19_I09950	Cysteine synthase/cystathionine beta-synthase P-phosphate attachment site:Pyridoxal-5'-phosphate-dependent enzyme, beta family	COG0031E	GO:0004124|GO:0006535|GO:0008652|GO:0016740|GO:0019344
BAbS19_I09960	Alanyl-transfer RNA synthetase	COG2872R	GO:0004813|GO:0005524|GO:0006419
BAbS19_I09970	Thiosulfate sulfurtransferase:Rhodanese-like	COG2897P	GO:0004792|GO:0004792|GO:0008272|GO:0016740
BAbS19_I09980	GCN5-related N-acetyltransferase	COG0452H	GO:0008080|GO:0008152|GO:0016740
BAbS19_I09990	Acetyl-CoA hydrolase/transferase	COG0427C	GO:0003824|GO:0006084|GO:0016740|GO:0016787
BAbS19_I10020	HlyD family secretion protein	COG1566V	GO:0000004|GO:0005554|GO:0008372
BAbS19_I10070	SAM (and some other nucleotide) binding motif:TPR repeat	COG4976R	GO:0008168|GO:0008689|GO:0016740
BAbS19_I10080	Bile acid:sodium symporter	COG0385R	GO:0000004|GO:0005554|GO:0008372
BAbS19_I10090	NAD binding site:NAD-dependent epimerase/dehydratase:UDP-glucose 4-epimerase	COG1087M	GO:0003978|GO:0003978|GO:0006012|GO:0016853
BAbS19_I10100	ATP/GTP-binding site motif A (P-loop):MazG family protein	COG1694R	GO:0000004|GO:0005554|GO:0008372
BAbS19_I10110	nitrilotriacetate monooxygenase component B	COG1853R	GO:0004497|GO:0010181|GO:0016491
BAbS19_I10120	Nitroreductase family	COG0778C	GO:0000004|GO:0005554|GO:0008372
BAbS19_I10130	hypothetical protein	-	GO:0000004|GO:0005554|GO:0008372
BAbS19_I10140	tRNA synthetase, class-II (G, H, P and S):Prolyl-tRNA synthetase, class IIa:Threonyl-tRNA synthetase, class IIa:TGS domain:A...	COG0441J	GO:0000166|GO:0004812|GO:0004812|GO:0004812|GO:0004829|GO:0004829|GO:0005524|GO:0005524|GO:0005524|GO:0005524|GO:0006412|GO:0006412|GO:0006418|GO:0006435|GO:0008270|GO:0016874|GO:0046872
BAbS19_I10150	D-alanyl-D-alanine carboxypeptidase 1, S11 family	COG1686M	GO:0004180|GO:0006508|GO:0009002|GO:0009002|GO:0016787
BAbS19_I10160	Protein of unknown function DUF37	COG0759S	GO:0000004|GO:0005554|GO:0008372
BAbS19_I10170	Nitrogen-fixing NifU-like, N-terminal	COG0822C	GO:0000004|GO:0005554|GO:0008372
BAbS19_I10180	GTP cyclohydrolase I	COG0302H	GO:0003934|GO:0003934|GO:0005737|GO:0016787|GO:0019438
BAbS19_I10190	phosphoribosyl-AMP cyclohydrolase	COG0139E	GO:0000105|GO:0000105|GO:0000105|GO:0004635|GO:0004635|GO:0004635|GO:0008652|GO:0016787
BAbS19_I10200	Patatin	COG1752R	GO:0000004|GO:0005554|GO:0008372
BAbS19_I10210	Phage integrase	-	GO:0003677|GO:0003677|GO:0006310|GO:0015074
BAbS19_I10220	hypothetical protein	-	GO:0000004|GO:0005554|GO:0008372
BAbS19_I10230	hypothetical protein	-	GO:0000004|GO:0005554|GO:0008372
BAbS19_I10240	Site-specific recombinase:Resolvase, N-terminal	COG1961L	GO:0000004|GO:0005554|GO:0008372
BAbS19_I10250	BRO family, N-terminal	COG3617K	GO:0000004|GO:0005554|GO:0008372
BAbS19_I10280	Acyl-CoA dehydrogenase:Acyl-CoA dehydrogenase, C-terminal:Acyl-CoA dehydrogenase, central domain:Acyl-CoA dehydrogenase, N-te...	COG1960I	GO:0003995|GO:0003995|GO:0004361|GO:0006118|GO:0006118|GO:0008152|GO:0016491|GO:0016627|GO:0050660
BAbS19_I10290	Bacterial regulatory protein LysR, HTH motif:LysR substrate binding domain	COG0583K	GO:0003677|GO:0003700|GO:0006350|GO:0006355|GO:0006355
BAbS19_I10300	Bacterial luciferase	COG2141C	GO:0016491|GO:0047646
BAbS19_I10310	Acriflavin resistance protein	COG0841V	GO:0000004|GO:0005554|GO:0008372
BAbS19_I10320	hypothetical protein	COG0845M	GO:0008565|GO:0009306|GO:0016020
BAbS19_I10330	Bacterial regulatory protein TetR, HTH motif	COG1309K	GO:0003677|GO:0003677|GO:0003700|GO:0006350|GO:0006355|GO:0006355|GO:0045449
BAbS19_I10340	Queuine/other tRNA-ribosyltransferase:Queuine tRNA-ribosyltransferase	COG0343J	GO:0006400|GO:0008033|GO:0008270|GO:0008479|GO:0008479|GO:0008479|GO:0008616|GO:0008616|GO:0008616|GO:0016740|GO:0016757
BAbS19_I10350	Queuosine biosynthesis protein	COG0809J	GO:0008616|GO:0008616|GO:0016740|GO:0016740|GO:0016853|GO:0016853
BAbS19_I10360	ATP/GTP-binding site motif A (P-loop):Peptidyl-prolyl cis-trans isomerase, cyclophilin type	COG0652O	GO:0003755|GO:0003755|GO:0006457|GO:0006457|GO:0016853
BAbS19_I10370	Peptidyl-prolyl cis-trans isomerase, cyclophilin type	COG0652O	GO:0003755|GO:0003755|GO:0006457|GO:0006457|GO:0016853
BAbS19_I10380	Coenzyme A biosynthesis protein:Cytidylyltransferase:Cytidyltransferase-related domain	COG0669H	GO:0003824|GO:0004595|GO:0004595|GO:0009058|GO:0015937|GO:0016740|GO:0016779
BAbS19_I10390	hypothetical protein	-	GO:0000004|GO:0005554|GO:0008372
BAbS19_I10400	DNA gyrase/topoisomerase IV, subunit A:DNA gyrase, subunit A:DNA gyrase C-terminal repeat, beta-propeller	COG0188L	GO:0003677|GO:0003677|GO:0003677|GO:0003677|GO:0003677|GO:0003918|GO:0003918|GO:0003918|GO:0003918|GO:0003918|GO:0003918|GO:0005524|GO:0005524|GO:0005524|GO:0005524|GO:0005524|GO:0005694|GO:0005694|GO:0005694|GO:0005694|GO:0005694|GO:0006259|GO:0006259|GO:0006259|GO:0006265|GO:0006265|GO:0006265|GO:0006265|GO:0006265|GO:0006268|GO:0016853
BAbS19_I10410	Multiple antibiotic resistance (MarC)-related proteins	COG2095U	GO:0000004|GO:0005554|GO:0008372
BAbS19_I10420	Guanylate kinase/L-type calcium channel region	COG3709P	GO:0016301
BAbS19_I10430	Bacterial regulatory protein, GntR family	COG2188K	GO:0003677|GO:0003700|GO:0005622|GO:0006350|GO:0006355|GO:0006355
BAbS19_I10440	hypothetical protein	-	GO:0000004|GO:0005554|GO:0008372
BAbS19_I10450	Single-strand binding protein	COG0629L	GO:0003677|GO:0003697|GO:0003697|GO:0006260|GO:0006260|GO:0006281|GO:0006974
BAbS19_I10460	Cytochrome c heme-binding site:ATP/GTP-binding site motif A (P-loop):ABC transporter:Excinuclease ABC, A subunit	COG0178L	GO:0000166|GO:0003677|GO:0003677|GO:0004518|GO:0005524|GO:0005524|GO:0005524|GO:0006281|GO:0006281|GO:0006281|GO:0006281|GO:0006289|GO:0006289|GO:0006289|GO:0006974|GO:0008270|GO:0009380|GO:0009381|GO:0009381|GO:0009432|GO:0009432|GO:0016887|GO:0046872
BAbS19_I10470	Histone-like bacterial DNA-binding protein	COG0776L	GO:0003677|GO:0003677|GO:0003677
BAbS19_I10480	Disease resistance protein:Chaperonin clpA/B:ATP/GTP-binding site motif A (P-loop):Peptidase family S16:ATP-dependent proteas...	COG0466O	GO:0000166|GO:0000166|GO:0004176|GO:0004176|GO:0004176|GO:0004176|GO:0004252|GO:0004252|GO:0004252|GO:0005524|GO:0005524|GO:0005524|GO:0006457|GO:0006508|GO:0006508|GO:0006510|GO:0006510|GO:0006986|GO:0008233|GO:0008846|GO:0016787|GO:0017111
BAbS19_I10490	hypothetical protein	-	GO:0000004|GO:0005554|GO:0008372
BAbS19_I10500	CbxX/CfqX superfamily:ATP/GTP-binding site motif A (P-loop):Bacterial chromosomal replication initiator protein, DnaA:AAA ATP...	COG1219O	GO:0000166|GO:0000166|GO:0005515|GO:0005524|GO:0005524|GO:0006457|GO:0008270|GO:0015031|GO:0016887|GO:0017111|GO:0046872
BAbS19_I10510	Clp protease	COG0739M	GO:0004252|GO:0006508|GO:0006508|GO:0008233|GO:0008462|GO:0008462|GO:0008462|GO:0016787
BAbS19_I10520	ATP/GTP-binding site motif A (P-loop):GTP1/OBG	COG2262R	GO:0005525
BAbS19_I10530	Host factor Hfq	COG1923R	GO:0003723|GO:0003723|GO:0003723|GO:0006355
BAbS19_I10540	hypothetical protein	-	GO:0000004|GO:0005554|GO:0008372
BAbS19_I10550	NAD binding site:TrkA-N:TrkA potassium uptake protein:TrkA-C	COG0569P	GO:0006813|GO:0006813|GO:0006813|GO:0008324|GO:0008324
BAbS19_I10560	CbxX/CfqX superfamily:Chaperonin clpA/B:Response regulator receiver:Sigma-54 factor interaction domain:Helix-turn-helix, Fis-...	COG2204T	GO:0000156|GO:0000160|GO:0000160|GO:0000166|GO:0000166|GO:0003677|GO:0005524|GO:0005524|GO:0005622|GO:0006350|GO:0006355|GO:0006355|GO:0006355|GO:0008134|GO:0017111
BAbS19_I10570	PAS domain:ATP-binding region, ATPase-like:Histidine kinase, HAMP region:Histidine kinase A, N-terminal:Bacterial sensor prot...	COG5000T	GO:0000155|GO:0004673|GO:0004871|GO:0004871|GO:0005524|GO:0005524|GO:0007165|GO:0007165|GO:0007165|GO:0016020|GO:0016020|GO:0016301|GO:0016310|GO:0016740|GO:0016772|GO:0018106
BAbS19_I10580	CbxX/CfqX superfamily:Response regulator receiver:Sigma-54 factor interaction domain:Helix-turn-helix, Fis-type:AAA ATPase	COG2204T	GO:0000156|GO:0000156|GO:0000160|GO:0000160|GO:0000160|GO:0000166|GO:0000166|GO:0003677|GO:0003677|GO:0005524|GO:0005524|GO:0005524|GO:0005622|GO:0006350|GO:0006355|GO:0006355|GO:0006355|GO:0008134|GO:0009399|GO:0009399|GO:0017111|GO:0050906
BAbS19_I10590	NtrB, nitrogen regulation protein NtrB	COG3852T	GO:0000155|GO:0000160|GO:0004673|GO:0004871|GO:0005524|GO:0007165|GO:0007165|GO:0016020|GO:0016020|GO:0016021|GO:0016301|GO:0016310|GO:0016740|GO:0016772|GO:0018106
BAbS19_I10600	NifR3, nitrogen regulation protein Nifr3	COG0042J	GO:0003824|GO:0008033|GO:0008033|GO:0008152|GO:0016491|GO:0016491|GO:0050660|GO:0050660
BAbS19_I10610	4-diphosphocytidyl-2C-methyl-D-erythritol synthase:YgbB	COG1211I	GO:0008299|GO:0008299|GO:0008685|GO:0008685|GO:0016114|GO:0016740|GO:0016779|GO:0050518|GO:0050518
BAbS19_I10620	CinA, C-terminal	COG1546R	GO:0000004|GO:0005554|GO:0008372
BAbS19_I10630	GLUCOSE 1-DEHYDROGENASE II	-	GO:0008152|GO:0008152|GO:0016491|GO:0016491|GO:0016491|GO:0047936
BAbS19_I10640	Hypothetical Cytosolic Protein	COG2867I	GO:0000004|GO:0005554|GO:0008372
BAbS19_I10650	Lipoate synthase:Elongator protein 3/MiaB/NifB:Radical SAM	COG0320H	GO:0003824|GO:0005506|GO:0005506|GO:0008152|GO:0009107|GO:0016740|GO:0016992|GO:0046872|GO:0051536|GO:0051538|GO:0051539
BAbS19_I10660	hypothetical protein	-	GO:0000004|GO:0005554|GO:0008372
BAbS19_I10670	Pyridine nucleotide-disulphide oxidoreductase, class-II:Mercuric reductase:Pyridine nucleotide-disulphide oxidoreductase, cla...	COG1249C	GO:0004148|GO:0004148|GO:0005737|GO:0006118|GO:0006118|GO:0006118|GO:0006118|GO:0008152|GO:0015036|GO:0016491|GO:0016491|GO:0016491|GO:0016491|GO:0045454|GO:0050660
BAbS19_I10680	Biotin/lipoyl attachment:Antifreeze protein, type I:Catalytic domain of components of various dehydrogenase complexes:2-oxo a...	COG0508C	GO:0004742|GO:0004742|GO:0006096|GO:0008152|GO:0008415|GO:0008415|GO:0016740|GO:0031405|GO:0045254
BAbS19_I10690	Biotin/lipoyl attachment:2-oxo acid dehydrogenase, acyltransferase component, lipoyl-binding:Transketolase, central region:Tr...	COG0022C	GO:0004739|GO:0008415|GO:0016491|GO:0016740|GO:0031405
BAbS19_I10700	Dehydrogenase, E1 component:Mitochondrial substrate carrier	COG1071C	GO:0004739|GO:0016491
BAbS19_I10710	Septum formation initiator	COG2919D	GO:0000004|GO:0005554|GO:0008372
BAbS19_I10720	SAM (and some other nucleotide) binding motif:Site-specific DNA-methyltransferase (cytosine-N4-specific)	COG0499H	GO:0008168|GO:0016740
BAbS19_I10730	Enolase	COG0148G	GO:0000015|GO:0000287|GO:0000287|GO:0004634|GO:0004634|GO:0004634|GO:0006096|GO:0006096|GO:0006096|GO:0016829|GO:0046872
BAbS19_I10740	DAHP synthetase I/KDSA superfamily:2-dehydro-3-deoxyphosphooctonate aldolase	COG2877M	GO:0003824|GO:0005737|GO:0008152|GO:0008152|GO:0008676|GO:0008676|GO:0016740
BAbS19_I10750	Glutamine amidotransferase class-I:CTP synthase	COG0504F	GO:0003883|GO:0003883|GO:0003883|GO:0006221|GO:0006221|GO:0006221|GO:0006541|GO:0016874
BAbS19_I10760	ErfK/YbiS/YcfS/YnhG	COG1376S	GO:0000004|GO:0005554|GO:0008372
BAbS19_I10770	Preprotein translocase SecG subunit	COG1314U	GO:0009306|GO:0015450|GO:0016021
BAbS19_I10780	Triosephosphate isomerase	COG0149G	GO:0003824|GO:0004807|GO:0004807|GO:0006094|GO:0006096|GO:0006098|GO:0006633|GO:0008152|GO:0008152|GO:0008610|GO:0016853
BAbS19_I10790	peptidyl-prolyl cis-trans isomerase D	COG0760O	GO:0003755|GO:0016853
BAbS19_I10800	Glycosyl transferase, family 3:Anthranilate phosphoribosyl transferase	COG0547E	GO:0000162|GO:0000162|GO:0000162|GO:0004048|GO:0004048|GO:0004048|GO:0008152|GO:0008652|GO:0009073|GO:0016740|GO:0016757|GO:0016757
BAbS19_I10810	Indole-3-glycerol phosphate synthase	COG0134E	GO:0003824|GO:0004425|GO:0004425|GO:0006568|GO:0008152|GO:0016829
BAbS19_I10820	Molybdopterin cofactor biosynthesis protein MoaC	COG0315H	GO:0006777|GO:0006777
BAbS19_I10830	Molybdenum cofactor biosynthesis protein:MoeA N-terminal region, domain I and II:MoeA C-terminal, domain IV	COG0303H	GO:0006777|GO:0006777
BAbS19_I10840	Peptidase family S24:Peptidase S24, C-terminal:LexA DNA-binding region	COG1973O	GO:0003677|GO:0003677|GO:0006350|GO:0006355|GO:0006508|GO:0008992|GO:0008992|GO:0016787|GO:0045449
BAbS19_I10850	ComEC/Rec2-related protein	COG0658R	GO:0000004|GO:0005554|GO:0008372
BAbS19_I10860	hypothetical protein	-	GO:0000004|GO:0005554|GO:0008372
BAbS19_I10870	Glutamyl-tRNA synthetase, class Ic:Arginyl-tRNA synthetase, class Ic:Aminoacyl-tRNA synthetase, class I:Glutamyl-tRNA synthe...	COG0008J	GO:0000166|GO:0004812|GO:0004812|GO:0004812|GO:0004818|GO:0004818|GO:0004818|GO:0004818|GO:0005524|GO:0005524|GO:0005524|GO:0005524|GO:0005524|GO:0005524|GO:0005737|GO:0006412|GO:0006412|GO:0006418|GO:0006424|GO:0006424|GO:0006424|GO:0016874|GO:0017101
BAbS19_I10880	Citrate synthase	COG0372C	GO:0004108|GO:0004108|GO:0005737|GO:0006099|GO:0008415|GO:0016740|GO:0046912
BAbS19_I10890	Glycosyl transferase, family 19	COG0763M	GO:0008915|GO:0008915|GO:0009245|GO:0016740|GO:0016757
BAbS19_I10900	hypothetical protein	COG3494S	GO:0000004|GO:0005554|GO:0008372
BAbS19_I10910	Bacterial transferase hexapeptide repeat	COG1043M	GO:0008415|GO:0008415|GO:0008610|GO:0008610|GO:0008780|GO:0008780|GO:0008780|GO:0009245|GO:0009245|GO:0016740
BAbS19_I10920	Thioesterase superfamily	COG0764I	GO:0005737|GO:0006633|GO:0008610|GO:0009245|GO:0009245|GO:0016829|GO:0016836|GO:0016836
BAbS19_I10930	Bacterial transferase hexapeptide repeat:UDP-3-O-[3-hydroxymyristoyl] glucosamine N-acyltransferase, LpxD	COG1044M	GO:0008415|GO:0008415|GO:0008610|GO:0009245|GO:0009245|GO:0009245|GO:0016740|GO:0016747|GO:0016747
BAbS19_I10940	Bacterial surface antigen (D15)	COG4775M	GO:0019867
BAbS19_I10950	Mammalian sterol-regulatory element binding protein (SREBP) site 2 protease:PDZ/DHR/GLGF domain:Zinc metalloprotease (putativ...	COG0750M	GO:0004222|GO:0005515|GO:0006508|GO:0008233|GO:0008237|GO:0008270|GO:0016021|GO:0016021|GO:0016787|GO:0046872
BAbS19_I10960	Phosphatidate cytidylyltransferase:Homoserine kinase	COG0575I	GO:0004605|GO:0004605|GO:0008654|GO:0008654|GO:0016020|GO:0016020|GO:0016020|GO:0016021|GO:0016740|GO:0016779
BAbS19_I10970	RNA-binding region RNP-1 (RNA recognition motif):Di-trans-poly-cis-decaprenylcistransferase	COG0020I	GO:0008152|GO:0008834|GO:0016740|GO:0016740
BAbS19_I10980	Ribosome recycling factor	COG0233J	GO:0006412
BAbS19_I10990	Aspartate/glutamate/uridylate kinase:Glutamate 5-kinase	COG0528F	GO:0004349|GO:0006221|GO:0006561|GO:0008652|GO:0009041|GO:0016301|GO:0016740
BAbS19_I11000	Ubiquitin-associated domain:Elongation factor Ts	COG0264J	GO:0003746|GO:0003746|GO:0003746|GO:0003746|GO:0005622|GO:0005622|GO:0006412|GO:0006414|GO:0006414|GO:0006414
BAbS19_I11010	Ribosomal protein S2:Ribosomal protein S2, bacterial and organelle form	COG0052J	GO:0003735|GO:0003735|GO:0005622|GO:0005840|GO:0006412|GO:0006412|GO:0015935|GO:0030529
BAbS19_I11020	hypothetical protein	COG4875S	GO:0000004|GO:0005554|GO:0008372
BAbS19_I11030	ATP/GTP-binding site motif A (P-loop)	-	GO:0000004|GO:0005554|GO:0008372
BAbS19_I11040	Endoribonuclease L-PSP	COG0251J	GO:0000004|GO:0005554|GO:0008372
BAbS19_I11070	Protein of unknown function DUF482	COG3146S	GO:0000004|GO:0005554|GO:0008372
BAbS19_I11080	Histidine triad (HIT) protein	COG0536R	GO:0000004|GO:0005554|GO:0008372
BAbS19_I11090	Chaperonin clpA/B:ATP/GTP-binding site motif A (P-loop):AAA ATPase:AAA ATPase, central region:Clp, N terminal	COG0542O	GO:0000166|GO:0000166|GO:0005524|GO:0005524|GO:0006457|GO:0017111
BAbS19_I11100	Protein of unknown function DUF174	COG2127S	GO:0000004|GO:0005554|GO:0008372
BAbS19_I11110	D-alanyl-D-alanine carboxypeptidase 1, S11 family	COG1686M	GO:0004180|GO:0006508|GO:0009002|GO:0009002|GO:0016787
BAbS19_I11120	hypothetical protein	-	GO:0000004|GO:0005554|GO:0008372
BAbS19_I11130	hypothetical protein	COG5458S	GO:0000004|GO:0005554|GO:0008372
BAbS19_I11140	L-serine dehydratase, iron-sulfur-dependent, single chain form	COG1760E	GO:0003941|GO:0006094|GO:0016829
BAbS19_I11150	hypothetical protein	-	GO:0000004|GO:0005554|GO:0008372
BAbS19_I11160	Protein of unknown function DUF218	COG1434S	GO:0000004|GO:0005554|GO:0008372
BAbS19_I11170	hypothetical protein	COG3503S	GO:0000004|GO:0005554|GO:0008372
BAbS19_I11180	Bacterial regulatory protein, MerR family	COG0789K	GO:0003700|GO:0005622|GO:0006355
BAbS19_I11190	hypothetical protein	-	GO:0000004|GO:0005554|GO:0008372
BAbS19_I11200	hypothetical protein	-	GO:0000004|GO:0005554|GO:0008372
BAbS19_I11210	hypothetical protein	-	GO:0000004|GO:0005554|GO:0008372
BAbS19_I11220	GTP cyclohydrolase I	COG0780R	GO:0008616|GO:0008616|GO:0016491|GO:0046857
BAbS19_I11230	hypothetical protein	-	GO:0000004|GO:0005554|GO:0008372
BAbS19_I11240	hypothetical protein	COG3803S	GO:0000004|GO:0005554|GO:0008372
BAbS19_I11250	Helix-turn-helix motif	COG3800R	GO:0043565
BAbS19_I11260	Carboxyl transferase family:Acetyl-CoA carboxylase carboxyl transferase, beta subunit	COG4799I	GO:0003989|GO:0004658|GO:0006633|GO:0009317|GO:0016740|GO:0016874|GO:0016874|GO:0016874
BAbS19_I11270	Biotin/lipoyl attachment:Biotin-requiring enzyme, attachment site:Carbamoyl-phosphate synthase L chain, ATP-binding:Carbamoyl...	COG4770I	GO:0003824|GO:0003824|GO:0003824|GO:0004658|GO:0005524|GO:0005524|GO:0005524|GO:0005524|GO:0005524|GO:0005524|GO:0009374|GO:0009374|GO:0016874|GO:0016874
BAbS19_I11280	Methylmalonyl-CoA mutase, N-terminal:Methylmalonyl-CoA mutase:Coenzyme B12-binding:Methylmalonyl-CoA mutase, C-terminal	COG1884I	GO:0004494|GO:0004494|GO:0008152|GO:0008152|GO:0016853|GO:0016853|GO:0016866|GO:0031419|GO:0031419|GO:0050897
BAbS19_I11290	hypothetical protein	-	GO:0000004|GO:0005554|GO:0008372
BAbS19_I11300	hypothetical protein	COG4666R	GO:0000004|GO:0005554|GO:0008372
BAbS19_I11310	hypothetical protein	-	GO:0000004|GO:0005554|GO:0008372
BAbS19_I11320	Tetracycline resistance protein TetB	COG2358R	GO:0000004|GO:0005554|GO:0008372
BAbS19_I11330	Asp/Glu racemase	COG0796M	GO:0008152|GO:0008881|GO:0008881|GO:0009252|GO:0016853|GO:0016855
BAbS19_I11340	tRNA/rRNA methyltransferase (SpoU):RNA methyltransferase TrmH family, group 1	COG0565J	GO:0003723|GO:0006396|GO:0008168|GO:0008173|GO:0008173|GO:0016740
BAbS19_I11350	Family of unknown function ThiJ/PfpI:Intracellular protease PfpI	COG0693R	GO:0016798
BAbS19_I11360	hypothetical protein	COG4321R	GO:0000004|GO:0005554|GO:0008372
BAbS19_I11370	Isocitrate/isopropylmalate dehydrogenase:Isocitrate dehydrogenase NADP-dependent, eukaryotic	COG0538C	GO:0004450|GO:0004450|GO:0008152|GO:0016491|GO:0016652
BAbS19_I11380	Alkaline phosphatase	COG1785P	GO:0004035|GO:0008152|GO:0016787
BAbS19_I11390	Alanyl-tRNA synthetase, class IIc:Phosphoesterase, DHHA1:Alanyl-transfer RNA synthetase	COG0013J	GO:0000166|GO:0004812|GO:0004813|GO:0004813|GO:0005524|GO:0005524|GO:0006412|GO:0006419|GO:0016874
BAbS19_I11400	RecA bacterial DNA recombination protein:ATP/GTP-binding site motif A (P-loop):AAA ATPase	COG0468L	GO:0000166|GO:0003677|GO:0005524|GO:0006259|GO:0008094|GO:0017111
BAbS19_I11410	hypothetical protein	-	GO:0000004|GO:0005554|GO:0008372
BAbS19_I11420	MotY protein:Bacterial outer membrane protein:OmpA/MotB domain	COG2885M	GO:0009279|GO:0009279|GO:0016021
BAbS19_I11430	transcriptional regulatory protein	COG4764S	GO:0000004|GO:0005554|GO:0008372
BAbS19_I11440	Shikimate kinase:Replication factor C conserved domain:ATP/GTP-binding site motif A (P-loop):AAA ATPase:AAA ATPase, central r...	COG2256L	GO:0000166|GO:0016301|GO:0017111
BAbS19_I11450	Serine protease, V8 family:Serine protease, trypsin family:PDZ/DHR/GLGF domain:HtrA/DegQ protease	COG0265O	GO:0004252|GO:0004252|GO:0004252|GO:0005515|GO:0006508|GO:0006508|GO:0008233|GO:0016787|GO:0042597
BAbS19_I11460	Ribosomal protein L17	COG0203J	GO:0003735|GO:0005622|GO:0005840|GO:0006412|GO:0006412|GO:0030529
BAbS19_I11470	RNA polymerase, alpha chain, bacterial and organelle	COG0202K	GO:0003677|GO:0003677|GO:0003677|GO:0003677|GO:0003899|GO:0003899|GO:0003899|GO:0003899|GO:0003899|GO:0003899|GO:0003899|GO:0003899|GO:0006350|GO:0006350|GO:0006350|GO:0006350|GO:0006350|GO:0006351|GO:0006351|GO:0016740|GO:0016779|GO:0046983
BAbS19_I11480	Ribosomal protein S11	COG0100J	GO:0003723|GO:0003735|GO:0005622|GO:0005840|GO:0006412|GO:0006412|GO:0019843|GO:0019843|GO:0030529
BAbS19_I11490	Ribosomal protein S13	COG0099J	GO:0000049|GO:0003723|GO:0003723|GO:0003735|GO:0005622|GO:0005840|GO:0006412|GO:0006412|GO:0019843|GO:0019843|GO:0030529
BAbS19_I11500	Shikimate kinase:Adenylate kinase:Adenylate kinase, subfamily	COG0563F	GO:0000166|GO:0004017|GO:0005524|GO:0005524|GO:0005524|GO:0005524|GO:0006139|GO:0006139|GO:0016301|GO:0016740|GO:0016776|GO:0019201|GO:0019201|GO:0019201
BAbS19_I11510	C-5 cytosine-specific DNA methylase:SecY protein	COG0201U	GO:0008168|GO:0009306|GO:0015450|GO:0016020
BAbS19_I11520	Ribosomal protein L15:Ribosomal protein L15, bacterial form	COG0200J	GO:0003723|GO:0003735|GO:0003735|GO:0005622|GO:0005840|GO:0006412|GO:0006412|GO:0006412|GO:0015934|GO:0019843|GO:0019843|GO:0030529
BAbS19_I11530	Ribosomal protein L30:Ribosomal protein L30, bacterial and organelle form	COG1841J	GO:0003735|GO:0006412|GO:0015934
BAbS19_I11540	Ribosomal protein S5:Ribosomal protein S5, C-terminal domain:Ribosomal protein S5, bacterial and organelle form	COG0098J	GO:0003723|GO:0003723|GO:0003723|GO:0003735|GO:0003735|GO:0003735|GO:0005622|GO:0005622|GO:0005622|GO:0005840|GO:0005840|GO:0006412|GO:0006412|GO:0006412|GO:0006412|GO:0015935|GO:0019843|GO:0019843|GO:0030529
BAbS19_I11550	Ribosomal protein L18:Ribosomal protein L18P/L5E	COG0256J	GO:0003723|GO:0003735|GO:0003735|GO:0005622|GO:0005622|GO:0005840|GO:0005840|GO:0006412|GO:0006412|GO:0006412|GO:0019843|GO:0019843|GO:0030529
BAbS19_I11560	Ribosomal protein L6:Ribosomal protein L6, signature 1	COG0097J	GO:0003723|GO:0003735|GO:0003735|GO:0005622|GO:0005622|GO:0005840|GO:0005840|GO:0006412|GO:0006412|GO:0006412|GO:0019843|GO:0019843|GO:0030529
BAbS19_I11570	Ribosomal protein S8	COG0096J	GO:0003723|GO:0003735|GO:0005622|GO:0005840|GO:0006412|GO:0006412|GO:0019843|GO:0019843|GO:0030529
BAbS19_I11580	30S ribosomal protein S14	COG0199J	GO:0003735|GO:0005622|GO:0005840|GO:0006412
BAbS19_I11590	50S ribosomal protein L5	COG0094J	GO:0000049|GO:0003723|GO:0003735|GO:0003735|GO:0005622|GO:0005622|GO:0005840|GO:0005840|GO:0006412|GO:0006412|GO:0006412|GO:0019843|GO:0019843|GO:0030529
BAbS19_I11600	Ribosomal protein L24:KOW:Ribosomal protein L24/L26:KOW (Kyprides, Ouzounis, Woese) motif	COG0198J	GO:0003723|GO:0003735|GO:0003735|GO:0005622|GO:0005622|GO:0005840|GO:0005840|GO:0006412|GO:0006412|GO:0006412|GO:0019843|GO:0019843|GO:0030529
BAbS19_I11610	Ribosomal protein L14b/L23e:Ribosomal protein L14, bacterial and organelle form	COG0093J	GO:0003723|GO:0003735|GO:0003735|GO:0005622|GO:0005840|GO:0006412|GO:0006412|GO:0006412|GO:0015934|GO:0019843|GO:0019843|GO:0030529
BAbS19_I11620	Ribosomal protein S17	COG0186J	GO:0003723|GO:0003735|GO:0005622|GO:0005840|GO:0006412|GO:0006412|GO:0019843|GO:0019843|GO:0030529
BAbS19_I11630	Ribosomal protein L29	COG0255J	GO:0003735|GO:0005622|GO:0005840|GO:0006412
BAbS19_I11640	Ribosomal protein L16	COG0197J	GO:0000049|GO:0003723|GO:0003735|GO:0005622|GO:0005840|GO:0006412|GO:0006412|GO:0019843|GO:0030529
BAbS19_I11650	Ribosomal protein S3:Type 2 KH domain:KH domain:Bacterial ribosomal protein S3	COG0092J	GO:0003676|GO:0003676|GO:0003723|GO:0003735|GO:0003735|GO:0005622|GO:0005840|GO:0006412|GO:0006412|GO:0006412|GO:0015935|GO:0019843|GO:0030529
BAbS19_I11660	Ribosomal protein L22/L17:ATP/GTP-binding site motif A (P-loop):Ribosomal protein S2:Ribosomal protein L22, bacterial and org...	COG0091J	GO:0003723|GO:0003735|GO:0003735|GO:0005622|GO:0005840|GO:0006412|GO:0006412|GO:0006412|GO:0015934|GO:0019843|GO:0019843|GO:0030529
BAbS19_I11670	Ribosomal protein S19/S15:Ribosomal protein S19, bacterial and organelle form	COG0185J	GO:0003723|GO:0003735|GO:0003735|GO:0005622|GO:0005840|GO:0006412|GO:0006412|GO:0006412|GO:0015935|GO:0019843|GO:0019843|GO:0030529
BAbS19_I11680	Ribosomal protein L2:Ribosomal protein L2, bacterial and organelle form	COG0090J	GO:0003723|GO:0003723|GO:0003735|GO:0003735|GO:0005622|GO:0005840|GO:0006412|GO:0006412|GO:0006412|GO:0015934|GO:0016740|GO:0019843|GO:0019843|GO:0030529
BAbS19_I11690	Ribosomal L23 protein	COG0089J	GO:0000166|GO:0003723|GO:0006412|GO:0019843|GO:0019843|GO:0030529
BAbS19_I11700	Ribosomal protein L4/L1e	COG0088J	GO:0003723|GO:0003735|GO:0005622|GO:0005840|GO:0006412|GO:0006412|GO:0019843|GO:0019843|GO:0030529
BAbS19_I11710	Ribosomal protein L3	COG0087J	GO:0003723|GO:0003735|GO:0005622|GO:0005840|GO:0006412|GO:0006412|GO:0019843|GO:0019843|GO:0030529
BAbS19_I11720	Ribosomal protein S10:Ribosomal protein S10, bacterial form	COG0051J	GO:0000049|GO:0003735|GO:0003735|GO:0005622|GO:0005840|GO:0006412|GO:0006412|GO:0006412|GO:0015935|GO:0030529
BAbS19_I11730	Elongation factor, GTP-binding:ATP/GTP-binding site motif A (P-loop):Elongation factor Tu, C-terminal:Elongation factor Tu, d...	COG0050J	GO:0000004|GO:0005554|GO:0008372
BAbS19_I11740	Elongation factor G, C-terminal:Elongation factor, GTP-binding:ATP/GTP-binding site motif A (P-loop):Elongation factor Tu, do...	COG0480J	GO:0000166|GO:0003746|GO:0003746|GO:0003746|GO:0003924|GO:0005525|GO:0005525|GO:0005525|GO:0005525|GO:0005525|GO:0005525|GO:0005622|GO:0006412|GO:0006414|GO:0006414
BAbS19_I11750	Ribosomal protein S7:Ribosomal protein S7, bacterial and organelle form	COG0049J	GO:0000049|GO:0003723|GO:0003735|GO:0003735|GO:0005622|GO:0005840|GO:0006412|GO:0006412|GO:0006412|GO:0015935|GO:0019843|GO:0019843|GO:0030529
BAbS19_I11760	Ribosomal protein S12, bacterial and chloroplast forms:Ribosomal protein S12/S23	COG0048J	GO:0000049|GO:0003723|GO:0003735|GO:0003735|GO:0005622|GO:0005840|GO:0006412|GO:0006412|GO:0006412|GO:0015935|GO:0019843|GO:0019843|GO:0030529
BAbS19_I11770	hypothetical protein	-	GO:0000004|GO:0005554|GO:0008372
BAbS19_I11780	RNA polymerase, alpha subunit:RNA polymerase I subunit A, N-terminal:RNA polymerase Rpb1, domain 1	COG0086K	GO:0003677|GO:0003677|GO:0003677|GO:0003677|GO:0003677|GO:0003899|GO:0003899|GO:0003899|GO:0003899|GO:0003899|GO:0003899|GO:0003899|GO:0005634|GO:0006350|GO:0006350|GO:0006350|GO:0006350|GO:0006350|GO:0006351|GO:0016740|GO:0016779
BAbS19_I11790	RNA polymerase Rpb2, domain 6:RNA polymerase, beta subunit:RNA polymerase Rpb2, domain 7:RNA polymerase Rpb2, domain 2:RNA po...	COG0085K	GO:0003677|GO:0003677|GO:0003677|GO:0003899|GO:0003899|GO:0003899|GO:0003899|GO:0003899|GO:0006350|GO:0006350|GO:0006350|GO:0006351|GO:0016740|GO:0016779
BAbS19_I11800	Ribosomal protein L7/L12	COG0222J	GO:0003735|GO:0003735|GO:0003735|GO:0005622|GO:0005622|GO:0005622|GO:0005840|GO:0005840|GO:0005840|GO:0006412|GO:0006412|GO:0006412|GO:0006412|GO:0030529
BAbS19_I11810	50S ribosomal protein L10	COG0244J	GO:0003735|GO:0005622|GO:0005840|GO:0006412|GO:0006412|GO:0030529
BAbS19_I11820	Ribosomal protein L1:Ribosomal protein L1, bacterial and chloroplast form	COG0081J	GO:0003723|GO:0003723|GO:0003735|GO:0003735|GO:0005622|GO:0005840|GO:0006412|GO:0006412|GO:0006412|GO:0015934|GO:0019843|GO:0019843|GO:0030529
BAbS19_I11830	Ribosomal protein L11:Ribosomal protein L11, bacterial	COG0080J	GO:0003723|GO:0003735|GO:0003735|GO:0005622|GO:0005840|GO:0005840|GO:0006412|GO:0006412|GO:0006412|GO:0019843|GO:0019843|GO:0030529
BAbS19_I11840	Bacterial transcription antitermination protein NusG:KOW:NGN:KOW (Kyprides, Ouzounis, Woese) motif	COG0250K	GO:0003711|GO:0003711|GO:0003711|GO:0006350|GO:0006353|GO:0006355|GO:0006355|GO:0006355|GO:0006355|GO:0031564
BAbS19_I11850	Protein secE/sec61-gamma protein:SecE subunit of protein translocation complex	COG0690U	GO:0006605|GO:0006886|GO:0009306|GO:0015450|GO:0016020|GO:0016021
BAbS19_I11860	Elongation factor, GTP-binding:ATP/GTP-binding site motif A (P-loop):Elongation factor Tu, C-terminal:Elongation factor Tu, d...	COG0050J	GO:0000004|GO:0005554|GO:0008372
BAbS19_I11870	RNA methyltransferase, TrmH family, group 3	COG0566J	GO:0003723|GO:0006396|GO:0008168|GO:0008173|GO:0008173|GO:0009451|GO:0016740
BAbS19_I11880	CBS domain	COG0517R	GO:0000004|GO:0005554|GO:0008372
BAbS19_I11890	Rhomboid-like protein	COG0705R	GO:0000004|GO:0005554|GO:0008372
BAbS19_I11900	hypothetical protein	COG5388S	GO:0000004|GO:0005554|GO:0008372
BAbS19_I11910	hypothetical protein	COG3672S	GO:0000004|GO:0005554|GO:0008372
BAbS19_I11920	Bacterial transferase hexapeptide repeat	COG0663R	GO:0008415|GO:0016740
BAbS19_I11930	hypothetical protein	-	GO:0000004|GO:0005554|GO:0008372
BAbS19_I11940	CysE, serine acetyltransferase	COG1045E	GO:0005737|GO:0006535|GO:0008415|GO:0008415|GO:0008652|GO:0009001|GO:0016740|GO:0019344
BAbS19_I11950	hypothetical protein	-	GO:0000004|GO:0005554|GO:0008372
BAbS19_I11960	Alpha/beta hydrolase fold:Esterase/lipase/thioesterase, active site:Prolyl aminopeptidase S33:Alpha/beta hydrolase	COG0596R	GO:0004177|GO:0006725|GO:0016787|GO:0016787
BAbS19_I11970	Protein of unknown function DUF192	COG1430S	GO:0000004|GO:0005554|GO:0008372
BAbS19_I11980	Cold-shock DNA-binding domain	COG1278K	GO:0003676|GO:0003677|GO:0003677|GO:0006350|GO:0006355|GO:0006355
BAbS19_I11990	hypothetical protein	-	GO:0000004|GO:0005554|GO:0008372
BAbS19_I12000	Glyoxalase/Bleomycin resistance protein/dioxygenase domain:Glyoxalase I	COG0346E	GO:0004462|GO:0016702|GO:0016829
BAbS19_I12030	Phosphoesterase, RecJ-like:Phosphoesterase, DHHA1:Bacterial RecJ exonuclease	COG0608L	GO:0004527|GO:0006281|GO:0006310|GO:0008409|GO:0016787
BAbS19_I12040	D-alanine--D-alanine ligase/VANA/B/C:D-alanine--D-alanine ligase	COG1181M	GO:0003824|GO:0003824|GO:0003824|GO:0005524|GO:0005524|GO:0005524|GO:0005737|GO:0008360|GO:0008716|GO:0008716|GO:0008716|GO:0009252|GO:0009252|GO:0009252|GO:0016874
BAbS19_I12050	hypothetical protein	-	GO:0000004|GO:0005554|GO:0008372
BAbS19_I12060	GlpX protein	COG1494G	GO:0006071
BAbS19_I12070	Homoserine dehydrogenase:Amino acid-binding ACT:Homoserine dehydrogenase, NAD binding domain	COG0460E	GO:0004412|GO:0008652|GO:0008652|GO:0009082|GO:0009086|GO:0009088|GO:0009097|GO:0016491
BAbS19_I12080	Aminotransferase, class-I:Aminotransferase, class I and II	COG0436E	GO:0008483|GO:0009016|GO:0016740
BAbS19_I12090	hypothetical protein	-	GO:0000004|GO:0005554|GO:0008372
BAbS19_I12100	hypothetical protein	COG3108S	GO:0000004|GO:0005554|GO:0008372
BAbS19_I12110	hypothetical protein	COG3553S	GO:0000004|GO:0005554|GO:0008372
BAbS19_I12120	Sugar fermentation stimulation protein	COG1489R	GO:0000004|GO:0005554|GO:0008372
BAbS19_I12130	Metallopeptidase family M24:Methionine aminopeptidase:Methionine aminopeptidase, subfamily 1	COG0024J	GO:0004177|GO:0004239|GO:0004239|GO:0006508|GO:0006508|GO:0006508|GO:0008233|GO:0008235|GO:0016787|GO:0046872|GO:0050897
BAbS19_I12140	DNA repair protein RadC	COG2003L	GO:0006281|GO:0006281|GO:0006974
BAbS19_I12150	hypothetical protein	COG3637M	GO:0000004|GO:0005554|GO:0008372
BAbS19_I12160	SAM (and some other nucleotide) binding motif:Uroporphyrin-III C/tetrapyrrole (Corrin/Porphyrin) methyltransferase:Precorrin-...	COG2241H	GO:0008152|GO:0008168|GO:0008168|GO:0008276|GO:0009236|GO:0009236|GO:0016740|GO:0046025|GO:0046025
BAbS19_I12170	nitrite reductase family protein	COG0155P	GO:0016664|GO:0042128
BAbS19_I12180	Precorrin-8X methylmutase CbiC/CobH	COG2082H	GO:0009236|GO:0016853|GO:0016867|GO:0016993
BAbS19_I12190	Uroporphyrin-III C/tetrapyrrole (Corrin/Porphyrin) methyltransferase:Precorrin-2 C20-methyltransferase	COG2243H	GO:0008152|GO:0008168|GO:0008168|GO:0008757|GO:0008757|GO:0009236|GO:0016740|GO:0030788
BAbS19_I12200	Uroporphyrin-III C/tetrapyrrole (Corrin/Porphyrin) methyltransferase:Cobalamin (vitamin B12) biosynthesis CbiG protein:Precor...	COG2073H	GO:0008152|GO:0008168|GO:0008168|GO:0008168|GO:0009236|GO:0016740|GO:0030789
BAbS19_I12210	hypothetical protein	-	GO:0000004|GO:0005554|GO:0008372
BAbS19_I12220	phospholipase/carboxylesterase family protein	-	GO:0000004|GO:0005554|GO:0008372
BAbS19_I12230	phospholipase/carboxylesterase family protein	-	GO:0000004|GO:0005554|GO:0008372
BAbS19_I12260	Leu/Ile/Val-binding protein family	COG0683E	GO:0000004|GO:0005554|GO:0008372
BAbS19_I12270	Cobalamin biosynthesis protein CbiB	COG1270H	GO:0009236|GO:0016021
BAbS19_I12280	Aminotransferase, class-I:Aminotransferase, class I and II	COG0079E	GO:0003824|GO:0008483|GO:0009058|GO:0016740
BAbS19_I12290	ATP/GTP-binding site motif A (P-loop):Cobyrinic acid a,c-diamide synthase:Cobyrinic acid a,c-diamide synthase CbiA	COG1797H	GO:0009236|GO:0042242
BAbS19_I12300	UROPORPHYRIN-III C-METHYLTRANSFERASE	COG0007H	GO:0004851|GO:0004851|GO:0006779|GO:0006779|GO:0006779|GO:0008152|GO:0008168|GO:0008168|GO:0008168
BAbS19_I12310	Cobalamin (vitamin B12) biosynthesis CbiD protein	COG1903H	GO:0008168|GO:0009236|GO:0009236|GO:0015420|GO:0016740|GO:0046140
BAbS19_I12320	Precorrin-6x reductase CbiJ/CobK	COG2099H	GO:0009236|GO:0016491|GO:0016994|GO:0016994
BAbS19_I12330	Uroporphyrin-III C/tetrapyrrole (Corrin/Porphyrin) methyltransferase:Uroporphiryn-III C-methyltransferase:Pecorrin-4 C11-meth...	COG2875H	GO:0006779|GO:0008152|GO:0008168|GO:0008168|GO:0008168|GO:0009058|GO:0009236|GO:0016740|GO:0046026|GO:0046026|GO:0046026
BAbS19_I12340	Antifreeze protein, type I	COG2073H	GO:0008168|GO:0016740|GO:0030789
BAbS19_I12350	hypothetical protein	COG4103S	GO:0000004|GO:0005554|GO:0008372
BAbS19_I12360	Protein of unknown function DUF81	COG0730R	GO:0000004|GO:0005554|GO:0008372
BAbS19_I12370	hypothetical protein	COG2510S	GO:0000004|GO:0005554|GO:0008372
BAbS19_I12380	cob(I)yrinic acid a,c-diamide adenosyltransferase	COG2109H	GO:0005524|GO:0008817|GO:0009236|GO:0016740
BAbS19_I12390	CobN/magnesium chelatase	COG1429H	GO:0000004|GO:0005554|GO:0008372
BAbS19_I12400	Dynamin:ATP/GTP-binding site motif A (P-loop):Cobalamin synthesis protein/P47K	COG0523R	GO:0000004|GO:0005554|GO:0008372
BAbS19_I12410	ATP/GTP-binding site motif A (P-loop):Cobalbumin biosynthesis enzyme	COG2087H	GO:0000004|GO:0005554|GO:0008372
BAbS19_I12420	hypothetical protein	COG5446S	GO:0000004|GO:0005554|GO:0008372
BAbS19_I12430	hypothetical protein	-	GO:0000004|GO:0005554|GO:0008372
BAbS19_I12440	Cobyrinic acid a,c-diamide synthase:Cobyric acid synthase CobQ	COG1492H	GO:0003824|GO:0009236
BAbS19_I12450	Acyl-CoA dehydrogenase:Acyl-CoA dehydrogenase, C-terminal:Acyl-CoA dehydrogenase, central domain:Acyl-CoA dehydrogenase, N-te...	COG1960I	GO:0003995|GO:0003995|GO:0003995|GO:0004085|GO:0006118|GO:0006118|GO:0006118|GO:0008152|GO:0016491|GO:0016627|GO:0050660
BAbS19_I12460	3-hydroxyisobutyrate dehydrogenase:6-phosphogluconate dehydrogenase, NAD binding domain:6-phosphogluconate dehydrogenase	COG2084I	GO:0004616|GO:0006098|GO:0006573|GO:0008442|GO:0008442|GO:0008442|GO:0016491|GO:0016491|GO:0050662|GO:0051287
BAbS19_I12470	hypothetical protein	-	GO:0000004|GO:0005554|GO:0008372
BAbS19_I12480	TRANSCRIPTIONAL REGULATORY PROTEIN, LYSR FAMILY	COG0583K	GO:0003677|GO:0003700|GO:0006350|GO:0006355|GO:0006355
BAbS19_I12490	TRANSCRIPTIONAL REGULATOR, ARAC FAMILY	COG4977K	GO:0003677|GO:0003677|GO:0003700|GO:0005622|GO:0006350|GO:0006355|GO:0006355|GO:0043565|GO:0045449
BAbS19_I12520	hypothetical protein	-	GO:0000004|GO:0005554|GO:0008372
BAbS19_I12530	Mechanosensitive (MS) ion channel:Mechanosensitive (MS) ion channel subdomain	COG3264M	GO:0016020
BAbS19_I12540	hypothetical protein	-	GO:0000004|GO:0005554|GO:0008372
BAbS19_I12550	Acriflavin resistance protein:SecD/SecF/SecDF export membrane protein:SecF protein:SecD export membrane protein	COG0342U	GO:0006886|GO:0006886|GO:0008565|GO:0009276|GO:0009276|GO:0015450|GO:0015450|GO:0015627|GO:0015628
BAbS19_I12560	Binding-protein-dependent transport systems inner membrane component:ATP/GTP-binding site motif A (P-loop):TrkA-N:Potassium e...	COG4651P	GO:0006812|GO:0006813|GO:0008324|GO:0016021
BAbS19_I12570	low PH-induced protein A	COG0392S	GO:0000004|GO:0005554|GO:0008372
BAbS19_I12600	Binding-protein-dependent transport systems inner membrane component	COG4208P	GO:0005215|GO:0006810|GO:0006810|GO:0006810|GO:0008272|GO:0009276|GO:0015116|GO:0015563|GO:0016020|GO:0016020|GO:0016021|GO:0016021
BAbS19_I12610	Binding-protein-dependent transport systems inner membrane component	COG0555O	GO:0005215|GO:0006810|GO:0006810|GO:0006810|GO:0008272|GO:0009276|GO:0015116|GO:0015563|GO:0016020|GO:0016020|GO:0016021|GO:0016021
BAbS19_I12620	Prokaryotic sulfate-/thiosulfate-binding protein:Bacterial extracellular solute-binding protein, family 1	COG4150P	GO:0008271|GO:0008272|GO:0008272|GO:0015419|GO:0030288|GO:0030288
BAbS19_I12630	Prokaryotic diacylglycerol kinase	-	GO:0004143|GO:0004143|GO:0008654|GO:0016020|GO:0016301|GO:0016740
BAbS19_I12640	CBS domain protein	COG1253R	GO:0000004|GO:0005554|GO:0008372
BAbS19_I12650	Putative membrane-associated alkaline phosphatase	COG0586S	GO:0000004|GO:0005554|GO:0008372
BAbS19_I12660	Calcium-binding EF-hand	-	GO:0005509|GO:0005509|GO:0005509
BAbS19_I12670	RbsD or FucU transport	COG4154G	GO:0000004|GO:0005554|GO:0008372
BAbS19_I12680	Short-chain dehydrogenase/reductase SDR:Glucose/ribitol dehydrogenase	-	GO:0008152|GO:0008152|GO:0016491|GO:0016491|GO:0016491
BAbS19_I12690	ATP/GTP-binding site motif A (P-loop):ABC transporter:AAA ATPase	COG1129G	GO:0000166|GO:0000166|GO:0005524|GO:0005524|GO:0016020|GO:0016020|GO:0016887|GO:0017111
BAbS19_I12720	Periplasmic binding protein/LacI transcriptional regulator	COG1879G	GO:0000004|GO:0005554|GO:0008372
BAbS19_I12730	Oxidoreductase, N-terminal:ATP/GTP-binding site motif A (P-loop):Oxidoreductase, C-terminal	COG0673R	GO:0016491|GO:0050112
BAbS19_I12740	ATP/GTP-binding site motif A (P-loop):ABC transporter:AAA ATPase	COG1119P	GO:0000166|GO:0000166|GO:0005524|GO:0005524|GO:0016020|GO:0016020|GO:0016887|GO:0017111
BAbS19_I12750	METAL CHELATE TRANSPORT SYSTEM PERMEASE PROTEIN	COG0609P	GO:0000004|GO:0005554|GO:0008372
BAbS19_I12760	Periplasmic binding protein	COG0614P	GO:0005381|GO:0006827
BAbS19_I12770	TonB-dependent receptor protein	COG4206H	GO:0004872|GO:0016020|GO:0019867
BAbS19_I12780	ABC transporter, family 2	COG0842V	GO:0005524|GO:0006810|GO:0016020|GO:0042626
BAbS19_I12790	ABC TRANSPORTER ATP-BINDING PROTEIN	COG0842V	GO:0005524|GO:0006810|GO:0016020|GO:0042626
BAbS19_I12800	ABC transporter, ATP binding/permease protein	COG1131V	GO:0000156|GO:0000160|GO:0000166|GO:0005524|GO:0005524|GO:0006355|GO:0006810|GO:0016020|GO:0016887|GO:0017111|GO:0042626
BAbS19_I12810	Gram-negative bacterial RTX secretion protein D:Secretion protein HlyD	COG0845M	GO:0009306|GO:0015428|GO:0016020
BAbS19_I12820	hypothetical protein	-	GO:0000004|GO:0005554|GO:0008372
BAbS19_I12830	Protein of unknown function DUF187	COG1649S	GO:0000004|GO:0005554|GO:0008372
BAbS19_I12840	Urease, gamma subunit	COG0831E	GO:0006807|GO:0009039|GO:0009039|GO:0009039|GO:0009039|GO:0016151|GO:0016787|GO:0019627
BAbS19_I12850	Urease, beta subunit	COG0832E	GO:0006807|GO:0009039|GO:0009039|GO:0009039|GO:0016151|GO:0016787
BAbS19_I12860	Urease:Amidohydrolase	COG0804E	GO:0006807|GO:0009039|GO:0009039|GO:0009039|GO:0009039|GO:0016151|GO:0016151|GO:0016151|GO:0016787|GO:0019627|GO:0046872
BAbS19_I12870	UREASE ACCESSORY PROTEIN UREE	COG2371O	GO:0006457|GO:0016151|GO:0018307
BAbS19_I12880	Urease accessory protein UreF	COG0830O	GO:0006807|GO:0016151
BAbS19_I12890	Chaperonin clpA/B:ATP/GTP-binding site motif A (P-loop):Ras GTPase superfamily:HypB/UreG, nucleotide-binding:Urease accessory...	COG0377C	GO:0006461|GO:0016151|GO:0016151
BAbS19_I12900	Urease accessory protein UreD	COG0829O	GO:0006807|GO:0016151
BAbS19_I12910	Urea transporter	COG4413E	GO:0015204|GO:0015840|GO:0016021
BAbS19_I12920	ATP-dependent DNA ligase	COG5266P	GO:0016874
BAbS19_I12930	Cobalamin (vitamin B12) biosynthesis CbiM protein	COG0310P	GO:0009236
BAbS19_I12940	hypothetical protein	-	GO:0000004|GO:0005554|GO:0008372
BAbS19_I12950	Cobalt transport protein	COG0619P	GO:0000004|GO:0005554|GO:0008372
BAbS19_I12960	ATP/GTP-binding site motif A (P-loop):ABC transporter:AAA ATPase	COG1122P	GO:0000166|GO:0000166|GO:0005524|GO:0005524|GO:0006810|GO:0006811|GO:0006824|GO:0015087|GO:0016020|GO:0016020|GO:0016787|GO:0016887|GO:0017111|GO:0050897
BAbS19_I12970	CrcB family protein	COG3439S	GO:0016020|GO:0016020|GO:0016021
BAbS19_I12980	Camphor resistance CrcB protein	COG0239D	GO:0016020
BAbS19_I12990	hypothetical protein	-	GO:0000004|GO:0005554|GO:0008372
BAbS19_I13000	hypothetical protein	COG3467R	GO:0000004|GO:0005554|GO:0008372
BAbS19_I13010	hypothetical protein	-	GO:0000004|GO:0005554|GO:0008372
BAbS19_I13020	phenazine biosynthesis protein, PhzF family	COG0384R	GO:0003824|GO:0009058
BAbS19_I13030	NUDIX hydrolase	COG0492O	GO:0016787|GO:0016787
BAbS19_I13040	Endonuclease/exonuclease/phosphatase family	-	GO:0004519|GO:0004527
BAbS19_I13050	hypothetical protein	-	GO:0000004|GO:0005554|GO:0008372
BAbS19_I13060	Aminotransferase, class I and II	COG1166E	GO:0008483|GO:0016740
BAbS19_I13070	Acetohydroxy acid isomeroreductase:Aromatic-ring hydroxylase	COG0058G	GO:0004455|GO:0004455|GO:0008652|GO:0009082|GO:0009082|GO:0009097|GO:0009099|GO:0016491|GO:0016491
BAbS19_I13080	Bacterial regulatory protein TetR, HTH motif	COG1309K	GO:0003677|GO:0003677|GO:0003700|GO:0006350|GO:0006355|GO:0006355|GO:0045449
BAbS19_I13090	hypothetical protein	-	GO:0000004|GO:0005554|GO:0008372
BAbS19_I13100	K+ potassium transporter	COG3158P	GO:0006810|GO:0006811|GO:0006813|GO:0006813|GO:0015079|GO:0016020|GO:0016020|GO:0016021|GO:0030955
BAbS19_I13110	hypothetical protein	-	GO:0000004|GO:0005554|GO:0008372
BAbS19_I13120	Pyridoxal phosphate biosynthetic protein PdxJ	COG0854H	GO:0003824|GO:0005737|GO:0008152|GO:0008615|GO:0008615|GO:0008615|GO:0016740|GO:0016769
BAbS19_I13130	hypothetical protein	-	GO:0000004|GO:0005554|GO:0008372
BAbS19_I13140	ATP/GTP-binding site motif A (P-loop)	COG0507L	GO:0008854|GO:0016787
BAbS19_I13150	Amino acid-binding ACT:Acetolactate synthase, small subunit	COG0440E	GO:0003984|GO:0003984|GO:0009082|GO:0016740
BAbS19_I13160	acetolactate synthase III large subunit	COG0027F	GO:0000287|GO:0000287|GO:0003984|GO:0009082|GO:0016740|GO:0030976|GO:0030976|GO:0050660
BAbS19_I13170	ATP/GTP-binding site motif A (P-loop):tRNA isopentenyltransferase	COG0324J	GO:0000166|GO:0004811|GO:0004811|GO:0004811|GO:0005524|GO:0005524|GO:0008033|GO:0016740
BAbS19_I13180	Phosphoserine phosphatase SerB:Haloacid dehalogenase-like hydrolase:HAD-superfamily hydrolase, subfamily IB (PSPase-like)	COG0560E	GO:0004647|GO:0004647|GO:0006564|GO:0006564|GO:0008152|GO:0008652|GO:0016787|GO:0016791
BAbS19_I13190	NAD binding site:Pyridine nucleotide-disulphide oxidoreductase, class I:FAD-dependent pyridine nucleotide-disulphide oxidored...	COG2081R	GO:0006118|GO:0016491
BAbS19_I13200	Serine protease, V8 family:Serine protease, trypsin family:PDZ/DHR/GLGF domain:HtrA/DegQ protease:Glucose/ribitol dehydrogenase	COG0265O	GO:0004252|GO:0004252|GO:0004252|GO:0005515|GO:0006508|GO:0006508|GO:0008233|GO:0016787|GO:0042597
BAbS19_I13210	hypothetical protein	COG3242S	GO:0000004|GO:0005554|GO:0008372
BAbS19_I13220	Band 7 protein	COG0330O	GO:0005515|GO:0008233|GO:0016021|GO:0016787
BAbS19_I13230	Band 7 protein:Stomatin	COG0330O	GO:0005515|GO:0016021
BAbS19_I13240	Dihydrofolate reductase	COG0262H	GO:0004146|GO:0004146|GO:0004146|GO:0006545|GO:0006545|GO:0009165|GO:0009165|GO:0016491|GO:0050661
BAbS19_I13250	Thymidylate synthase	COG0207F	GO:0004799|GO:0004799|GO:0006231|GO:0008168|GO:0009165|GO:0016740
BAbS19_I13260	hypothetical protein	-	GO:0000004|GO:0005554|GO:0008372
BAbS19_I13270	Drug resistance transporter Bcr/CflA subfamily:General substrate transporter:Major facilitator superfamily (MFS)	-	GO:0005215|GO:0005215|GO:0006810|GO:0006810|GO:0006810|GO:0016020|GO:0016020|GO:0016021|GO:0016021|GO:0016021
BAbS19_I13280	hypothetical protein	-	GO:0000004|GO:0005554|GO:0008372
BAbS19_I13290	Beta and gamma crystallin:Bacterial regulatory protein TetR, HTH motif	COG1309K	GO:0003677|GO:0003677|GO:0003700|GO:0006350|GO:0006355|GO:0006355|GO:0045449
BAbS19_I13300	hypothetical protein	COG3814S	GO:0000004|GO:0005554|GO:0008372
BAbS19_I13310	hypothetical protein	-	GO:0000004|GO:0005554|GO:0008372
BAbS19_I13320	hypothetical protein	-	GO:0000004|GO:0005554|GO:0008372
BAbS19_I13330	hypothetical protein	COG4321R	GO:0000004|GO:0005554|GO:0008372
BAbS19_I13340	Alpha-isopropylmalate/homocitrate synthase:AsmA	-	GO:0000004|GO:0005554|GO:0008372
BAbS19_I13350	hypothetical protein	-	GO:0000004|GO:0005554|GO:0008372
BAbS19_I13360	FAD linked oxidase, C-terminal:FAD linked oxidase, N-terminal	COG0277C	GO:0004458|GO:0016491
BAbS19_I13370	hypothetical protein	COG4702S	GO:0000004|GO:0005554|GO:0008372
BAbS19_I13380	serine/threonine protein kinase	-	GO:0000166|GO:0004672|GO:0005524|GO:0005524|GO:0006468
BAbS19_I13390	UvrD/REP helicase:ATP/GTP-binding site motif A (P-loop)	COG0210L	GO:0003677|GO:0004003|GO:0004386|GO:0005524|GO:0006281|GO:0016787
BAbS19_I13400	hypothetical protein	COG3045S	GO:0000004|GO:0005554|GO:0008372
BAbS19_I13410	Bacterial transferase hexapeptide repeat	COG0110R	GO:0008415|GO:0008415|GO:0008811|GO:0016740
BAbS19_I13420	Electron transport protein SCO1/SenC	COG1999R	GO:0006118
BAbS19_I13430	SAM (and some other nucleotide) binding motif	COG2264J	GO:0006479|GO:0008168|GO:0008276|GO:0016740
BAbS19_I13440	Metallopeptidase family M24	COG0006E	GO:0004177|GO:0006508|GO:0008235|GO:0008451|GO:0016787
BAbS19_I13450	hypothetical protein	COG5587S	GO:0000004|GO:0005554|GO:0008372
BAbS19_I13460	BRCT domain:NAD-dependent DNA ligase:ATP/GTP-binding site motif A (P-loop):Zn-finger in NAD-dependent DNA ligase, C4 type:NAD...	COG0272L	GO:0003911|GO:0003911|GO:0003911|GO:0005622|GO:0005622|GO:0006260|GO:0006260|GO:0006260|GO:0006281|GO:0006281|GO:0006281|GO:0006974|GO:0016874|GO:0043565
BAbS19_I13470	ATP/GTP-binding site motif A (P-loop):ABC transporter:DNA repair protein RecN	COG0497L	GO:0005524|GO:0006281|GO:0006310|GO:0016020|GO:0016020
BAbS19_I13480	TPR repeat-containing protein	COG4105R	GO:0005488
BAbS19_I13490	UDP-3-0-acyl N-acetylglucosamine deacetylase	COG0774M	GO:0008759|GO:0009245|GO:0016787
BAbS19_I13500	Cell division protein FtsZ:Tubulin family:Proline-rich region:Tubulin/FtsZ protein	COG0206D	GO:0000166|GO:0000917|GO:0005525|GO:0005525|GO:0005737|GO:0007049|GO:0051301
BAbS19_I13510	Heat shock protein Hsp70:Cell division protein FtsA	COG0849D	GO:0006457|GO:0006986|GO:0007049|GO:0051301
BAbS19_I13520	CELL DIVISION PROTEIN FTSQ	COG1589M	GO:0000004|GO:0005554|GO:0008372
BAbS19_I13530	D-alanine--D-alanine ligase/VANA/B/C:D-alanine--D-alanine ligase	COG1181M	GO:0003824|GO:0003824|GO:0003824|GO:0005524|GO:0005524|GO:0005524|GO:0005737|GO:0008360|GO:0008716|GO:0008716|GO:0008716|GO:0009252|GO:0009252|GO:0009252|GO:0016874
BAbS19_I13540	Helix-turn-helix, AraC type:UDP-N-acetylenolpyruvoylglucosamine reductase:FAD linked oxidase, N-terminal	COG0812M	GO:0008762|GO:0008762|GO:0009252|GO:0016491
BAbS19_I13550	Cytoplasmic peptidoglycan synthetase, N-terminal:Cytoplasmic peptidoglycan synthetase, C-terminal:UDP-N-acetylmuramate--ala...	COG0773M	GO:0000166|GO:0005524|GO:0005524|GO:0005524|GO:0005737|GO:0007049|GO:0008360|GO:0008360|GO:0008763|GO:0008763|GO:0008763|GO:0009252|GO:0009252|GO:0009252|GO:0009273|GO:0009273|GO:0016874|GO:0016879|GO:0051301|GO:0051301
BAbS19_I13560	Glycosyl transferase, family 28:N-acetylglucosaminyltransferase, MurG:Glycosyltransferase 28, C-terminal	COG0707M	GO:0009276|GO:0016740|GO:0016757|GO:0019277|GO:0050511|GO:0050511
BAbS19_I13570	Cell cycle protein:Phosphopantetheine attachment site	COG0772D	GO:0009252|GO:0016021|GO:0051301
BAbS19_I13580	Cytoplasmic peptidoglycan synthetase, N-terminal:Pyridine nucleotide-disulphide oxidoreductase, class I:Folylpolyglutamate s...	COG0771M	GO:0000166|GO:0005524|GO:0005524|GO:0005524|GO:0005737|GO:0007049|GO:0008360|GO:0008360|GO:0008764|GO:0008764|GO:0008764|GO:0009252|GO:0009252|GO:0009252|GO:0009273|GO:0009273|GO:0016874|GO:0016879|GO:0051301|GO:0051301
BAbS19_I13590	Glycosyl transferase, family 4:Phospho-N-acetylmuramoyl-pentapeptide transferase	COG0472M	GO:0003824|GO:0006629|GO:0007049|GO:0008360|GO:0008963|GO:0008963|GO:0008963|GO:0009252|GO:0009252|GO:0016020|GO:0016020|GO:0016020|GO:0016020|GO:0016021|GO:0016740|GO:0051301
BAbS19_I13600	Cytoplasmic peptidoglycan synthetase, N-terminal:Chaperonin Cpn60:Cytoplasmic peptidoglycan synthetase, C-terminal:UDP-N-ac...	COG0770M	GO:0000166|GO:0005524|GO:0005524|GO:0005524|GO:0005737|GO:0007049|GO:0008360|GO:0008360|GO:0008766|GO:0009252|GO:0009252|GO:0009273|GO:0016874|GO:0016879|GO:0051301|GO:0051301
BAbS19_I13610	Cytoplasmic peptidoglycan synthetase, N-terminal:Cytoplasmic peptidoglycan synthetase, C-terminal:UDP-N-acetylmuramyl-tripe...	COG0769M	GO:0000166|GO:0005524|GO:0005524|GO:0005737|GO:0007049|GO:0008360|GO:0008360|GO:0008765|GO:0009252|GO:0009252|GO:0009273|GO:0009273|GO:0016874|GO:0016879|GO:0016881|GO:0051301|GO:0051301
BAbS19_I13620	Beta-lactamase, class A:Penicillin-binding protein, transpeptidase domain:ATP/GTP-binding site motif A (P-loop):Penicillin-bi...	COG0768M	GO:0008658
BAbS19_I13630	hypothetical protein	COG5462S	GO:0000004|GO:0005554|GO:0008372
BAbS19_I13640	Bacterial methyltransferase	COG0275M	GO:0008168|GO:0008168|GO:0008168|GO:0016740
BAbS19_I13650	Natural resistance-associated macrophage protein	COG1914P	GO:0005215|GO:0006810|GO:0016020
BAbS19_I13660	SLT domain	COG0741M	GO:0000004|GO:0005554|GO:0008372
BAbS19_I13670	Putative peptidoglycan binding domain 1:N-acetylmuramoyl-L-alanine amidase, family 2	COG3023V	GO:0000270|GO:0008745|GO:0008745|GO:0009253|GO:0016787
BAbS19_I13680	Heat shock protein DnaJ, N-terminal	COG1076O	GO:0006457|GO:0006457|GO:0006986|GO:0031072
BAbS19_I13690	Antifreeze protein, type I	-	GO:0005506|GO:0006118|GO:0009055|GO:0020037
BAbS19_I13700	Glycoside hydrolase, family 25	COG3757M	GO:0003796|GO:0003824|GO:0005975|GO:0009253|GO:0016787|GO:0016998|GO:0043169
BAbS19_I13710	Putative peptidoglycan binding domain 1	COG2951M	GO:0000270|GO:0008152|GO:0016787|GO:0016798
BAbS19_I13720	Auxin Efflux Carrier	COG0679R	GO:0000004|GO:0005554|GO:0008372
BAbS19_I13730	Methylenetetrahydrofolate reductase:5,10-methylenetetrahydrofolate reductase	COG0685E	GO:0009086
BAbS19_I13740	SAM (and some other nucleotide) binding motif:Generic methyltransferase:Bacterial regulatory protein, ArsR family	COG0499H	GO:0003677|GO:0003700|GO:0005622|GO:0006350|GO:0006355|GO:0006355|GO:0008168|GO:0016740
BAbS19_I13750	hypothetical protein	COG5586S	GO:0000004|GO:0005554|GO:0008372
BAbS19_I13760	ALPHA-KETOGLUTARATE PERMEASE	COG0476H	GO:0005215|GO:0005215|GO:0005215|GO:0006810|GO:0006810|GO:0006810|GO:0006810|GO:0016020|GO:0016020|GO:0016020|GO:0016021|GO:0016021|GO:0016021
BAbS19_I13770	TRANS-ACONITATE METHYLTRANSFERASE	COG4106R	GO:0008168|GO:0016740|GO:0030798|GO:0030798
BAbS19_I13780	ATP/GTP-binding site motif A (P-loop):ABC transporter:AAA ATPase	COG0488R	GO:0000166|GO:0000166|GO:0005524|GO:0005524|GO:0016020|GO:0016020|GO:0016887|GO:0017111
BAbS19_I13790	hypothetical protein	-	GO:0000004|GO:0005554|GO:0008372
BAbS19_I13800	Esterase/lipase/thioesterase, active site:Prolyl aminopeptidase S33	COG2267I	GO:0004177
BAbS19_I13810	hypothetical protein	-	GO:0000004|GO:0005554|GO:0008372
BAbS19_I13840	Rieske 2Fe-2S family protein	COG4637R	GO:0005506|GO:0006118|GO:0006725
BAbS19_I13850	Phthalate dioxygenase reductase:Ferredoxin:Phenol hydroxylase reductase:Oxidoreductase FAD/NAD(P)-binding:Flavoprotein pyridi...	COG1018C	GO:0005506|GO:0005506|GO:0006118|GO:0006118|GO:0006118|GO:0006118|GO:0009055|GO:0009055|GO:0016491|GO:0016702
BAbS19_I13860	PhnA protein	COG2824P	GO:0000004|GO:0005554|GO:0008372
BAbS19_I13870	Isochorismatase hydrolase family	COG1335Q	GO:0003824|GO:0008152|GO:0016787
BAbS19_I13880	Protein of unknown function DUF475	COG2899S	GO:0000004|GO:0005554|GO:0008372
BAbS19_I13890	hypothetical protein	-	GO:0000004|GO:0005554|GO:0008372
BAbS19_I13900	choloylglycine hydrolase family protein	COG3049M	GO:0016787
BAbS19_I13910	hypothetical protein	-	GO:0000004|GO:0005554|GO:0008372
BAbS19_I13920	hypothetical protein	-	GO:0000004|GO:0005554|GO:0008372
BAbS19_I13930	hypothetical protein	-	GO:0000004|GO:0005554|GO:0008372
BAbS19_I13940	Phage integrase	COG0582L	GO:0003677|GO:0003677|GO:0006310|GO:0015074
BAbS19_I13950	immunoreactive 28 kDa outer membrane protein	COG2968S	GO:0000004|GO:0005554|GO:0008372
BAbS19_I13960	Antifreeze protein, type I	-	GO:0000004|GO:0005554|GO:0008372
BAbS19_I13970	hypothetical protein	COG2983S	GO:0000004|GO:0005554|GO:0008372
BAbS19_I13980	hypothetical protein	COG5453S	GO:0000004|GO:0005554|GO:0008372
BAbS19_I13990	Sigma-70 factor family:Sigma-70 factor, region 1.1:Sigma-70 region 3:Sigma-70 region 2:Sigma-70 region 4:Sigma-70, non-essent...	COG0568K	GO:0003677|GO:0003677|GO:0003677|GO:0003700|GO:0003700|GO:0006352|GO:0006352|GO:0006352|GO:0006355|GO:0006355|GO:0006355|GO:0016987|GO:0016987|GO:0016987
BAbS19_I14000	Mitochondrial substrate carrier:Zn-finger, CHC2 type:Toprim sub-domain:TOPRIM:DNA primase:Toprim, primase	COG0358L	GO:0003676|GO:0003677|GO:0003896|GO:0003896|GO:0003896|GO:0003899|GO:0005658|GO:0006260|GO:0006260|GO:0006269|GO:0006269|GO:0006269|GO:0006304|GO:0008270|GO:0008270|GO:0016740|GO:0016779|GO:0046872
BAbS19_I14010	Na+/Pi-cotransporter	COG1283P	GO:0000004|GO:0005554|GO:0008372
BAbS19_I14020	GatB/Yqey	COG1610S	GO:0000004|GO:0005554|GO:0008372
BAbS19_I14030	Glutamine amidotransferase class-I:Carbamoyl-phosphate synthase, GATase domain:Carbamoyl-phosphate synthase, small chain:Anth...	COG0504F	GO:0003824|GO:0003824|GO:0004086|GO:0004086|GO:0004088|GO:0005524|GO:0006541|GO:0006541|GO:0006541|GO:0006807|GO:0006807|GO:0009058|GO:0016740|GO:0016874|GO:0016874
BAbS19_I14040	Neutral zinc metallopeptidase, zinc-binding region:Putative neutral zinc metallopeptidase	COG2321R	GO:0016787
BAbS19_I14050	hypothetical protein	COG5395S	GO:0000004|GO:0005554|GO:0008372
BAbS19_I14060	hypothetical protein	COG3278O	GO:0000004|GO:0005554|GO:0008372
BAbS19_I14070	Methylglyoxal synthase-like domain:Carbamoyl-phosphate synthase L chain, ATP-binding:Carbamoyl-phosphate synthetase large cha...	COG0457R	GO:0000166|GO:0003824|GO:0003824|GO:0003824|GO:0003824|GO:0004086|GO:0004086|GO:0004088|GO:0005524|GO:0005524|GO:0005524|GO:0005524|GO:0005524|GO:0005524|GO:0006221|GO:0006526|GO:0006807|GO:0008652|GO:0016874|GO:0030145|GO:0046872
BAbS19_I14080	ABC transporter	COG4178R	GO:0005524|GO:0005524|GO:0006810|GO:0016020|GO:0016020|GO:0016021|GO:0016021|GO:0016887|GO:0042626
BAbS19_I14090	NUDIX hydrolase	COG0492O	GO:0016787|GO:0016787
BAbS19_I14100	Cold-shock DNA-binding domain	COG1278K	GO:0003676|GO:0003677|GO:0003677|GO:0006350|GO:0006355|GO:0006355
BAbS19_I14110	Glutathione S-transferase, N-terminal:Glutathione S-transferase, C-terminal	COG0625O	GO:0016740
BAbS19_I14120	1-aminocyclopropane-1-carboxylate synthase:Aminotransferase, class-I:Aminotransferase, class I and II	COG0436E	GO:0003824|GO:0004069|GO:0008483|GO:0009058|GO:0009058|GO:0016740|GO:0016847
BAbS19_I14130	hypothetical protein	-	GO:0000004|GO:0005554|GO:0008372
BAbS19_I14140	Bacterial regulatory protein LysR, HTH motif:LysR substrate binding domain	COG0583K	GO:0003677|GO:0003700|GO:0006350|GO:0006355|GO:0006355
BAbS19_I14150	Pyridine nucleotide-disulphide oxidoreductase, class-II:Adrenodoxin reductase:Pyridine nucleotide-disulphide oxidoreductase, ...	COG0492O	GO:0004791|GO:0004791|GO:0005737|GO:0006118|GO:0006118|GO:0006118|GO:0006118|GO:0015036|GO:0016491|GO:0016491|GO:0016491|GO:0019430
BAbS19_I14160	Pyrokinin:Potassium channel TASK:Cation transporter	COG0168P	GO:0005216
BAbS19_I14170	Bacterial regulatory proteins, AsnC family	COG1522K	GO:0003677|GO:0003700|GO:0005622|GO:0006350|GO:0006355|GO:0006355|GO:0043565
BAbS19_I14180	Glycosyl transferase, group 1	COG0438M	GO:0016740
BAbS19_I14190	Prokaryotic transcription elongation factor GreA/GreB:Prokaryotic transcription elongation factor GreA	COG0782K	GO:0003677|GO:0003677|GO:0003677|GO:0003711|GO:0003711|GO:0003711|GO:0003746|GO:0006355|GO:0006355|GO:0006355
BAbS19_I14200	hypothetical protein	-	GO:0000004|GO:0005554|GO:0008372
BAbS19_I14210	hypothetical protein	-	GO:0000004|GO:0005554|GO:0008372
BAbS19_I14220	Protein of unknown function DUF6	COG0696G	GO:0000004|GO:0005554|GO:0008372
BAbS19_I14230	Protein of unknown function DUF486	COG3169S	GO:0000004|GO:0005554|GO:0008372
BAbS19_I14240	hypothetical protein	COG3921S	GO:0000004|GO:0005554|GO:0008372
BAbS19_I14250	Thioesterase superfamily	COG1607I	GO:0000004|GO:0005554|GO:0008372
BAbS19_I14260	Bacterial SH3-like region	COG4991S	GO:0000004|GO:0005554|GO:0008372
BAbS19_I14270	DEAD/DEAH box helicase:Helicase, C-terminal:ATP/GTP-binding site motif A (P-loop):UvrB/UvrC protein:Excinuclease ABC, B subunit	COG0556L	GO:0003676|GO:0003677|GO:0004386|GO:0004386|GO:0004518|GO:0005524|GO:0005737|GO:0006289|GO:0006289|GO:0009380|GO:0009381
BAbS19_I14280	SLT domain	COG0741M	GO:0008152|GO:0016787|GO:0016798
BAbS19_I14290	Cold-shock DNA-binding domain	COG1278K	GO:0003676|GO:0003676|GO:0003677|GO:0003677|GO:0006350|GO:0006355|GO:0006355
BAbS19_I14300	Vacuolar H+-transporting two-sector ATPase, C subunit:Binding-protein-dependent transport systems inner membrane component:Ar...	-	GO:0005215|GO:0006810|GO:0006810|GO:0016020|GO:0016021
BAbS19_I14310	Glutelin:Proline-rich region	-	GO:0000004|GO:0005554|GO:0008372
BAbS19_I14320	Beta-lactamase-like	COG0491R	GO:0000004|GO:0005554|GO:0008372
BAbS19_I14330	C-5 cytosine-specific DNA methylase	-	GO:0008168
BAbS19_I14340	hypothetical protein	-	GO:0000004|GO:0005554|GO:0008372
BAbS19_I14350	Bacterial regulatory protein, MarR family	COG1846K	GO:0003677|GO:0003700|GO:0005622|GO:0006350|GO:0006355|GO:0006355
BAbS19_I14360	Response regulator receiver:Transcriptional regulatory protein, C terminal	COG0744M	GO:0000156|GO:0000156|GO:0000160|GO:0000160|GO:0000160|GO:0003677|GO:0003677|GO:0006350|GO:0006355|GO:0006355|GO:0006355
BAbS19_I14370	OSMOLARITY SENSOR PROTEIN ENVZ	COG0642T	GO:0000155|GO:0000160|GO:0004673|GO:0004871|GO:0005524|GO:0007165|GO:0007165|GO:0016020|GO:0016020|GO:0016020|GO:0016021|GO:0016301|GO:0016310|GO:0016740|GO:0016772|GO:0018106
BAbS19_I14380	hypothetical protein	-	GO:0000004|GO:0005554|GO:0008372
BAbS19_I14390	t-RNA-binding region	COG0073R	GO:0000049|GO:0000049|GO:0000049|GO:0003723|GO:0008565|GO:0015031
BAbS19_I14400	hypothetical protein	COG5465S	GO:0000004|GO:0005554|GO:0008372
BAbS19_I14410	Protein of unknown function DUF526	COG2960S	GO:0000004|GO:0005554|GO:0008372
BAbS19_I14420	GCN5-related N-acetyltransferase	-	GO:0008080|GO:0008152|GO:0016740
BAbS19_I14430	Prolipoprotein diacylglyceryl transferase	COG0682M	GO:0009249|GO:0016020|GO:0016740|GO:0016740|GO:0016757
BAbS19_I14440	Protein of unknown function DUF185	COG1565S	GO:0000004|GO:0005554|GO:0008372
BAbS19_I14450	Protein of unknown function DUF152	COG1496S	GO:0005344|GO:0006810|GO:0015671
BAbS19_I14460	Metallopeptidase family M24	COG0006E	GO:0004251|GO:0006508|GO:0008235|GO:0016787|GO:0016805
BAbS19_I14470	lipoprotein, putative	-	GO:0000004|GO:0005554|GO:0008372
BAbS19_I14480	Phosphoribosyltransferase:Purine/pyrimidine phosphoribosyl transferase:Ribose-phosphate pyrophosphokinase	COG0461F	GO:0004749|GO:0004749|GO:0004749|GO:0009156|GO:0009165|GO:0016301|GO:0016740|GO:0016757|GO:0016978
BAbS19_I14490	Proline-rich region:ATP/GTP-binding site motif A (P-loop)	COG0433R	GO:0000166|GO:0003677|GO:0006350|GO:0006355|GO:0017111
BAbS19_I14500	Ribosomal protein L25	COG1825J	GO:0003723|GO:0003723|GO:0003735|GO:0005622|GO:0005840|GO:0006412|GO:0006412|GO:0008097|GO:0019843|GO:0030529
BAbS19_I14510	Peptidyl-tRNA hydrolase	COG0193J	GO:0004045|GO:0004045|GO:0004045|GO:0006412|GO:0006412|GO:0016787
BAbS19_I14520	Glutamine amidotransferase, class-II:ATP/GTP-binding site motif A (P-loop):Conserved hypothetical protein 92:GTP1/OBG	COG0012J	GO:0005525|GO:0005525
BAbS19_I14530	MaoC-like dehydratase	COG2030I	GO:0000004|GO:0005554|GO:0008372
BAbS19_I14540	MaoC-like dehydratase	COG2030I	GO:0000004|GO:0005554|GO:0008372
BAbS19_I14550	Phosphoribosyltransferase:Purine/pyrimidine phosphoribosyl transferase:Adenine phosphoribosyl transferase	COG0503F	GO:0003999|GO:0003999|GO:0006166|GO:0006168|GO:0016740|GO:0016740|GO:0016757
BAbS19_I14560	Cytochrome c heme-binding site:Ribosomal protein P2:Cytochrome c1	COG2857C	GO:0005506|GO:0005506|GO:0005506|GO:0006118|GO:0006118|GO:0006118|GO:0008121|GO:0009055|GO:0009055|GO:0009055|GO:0016491|GO:0020037|GO:0020037|GO:0020037
BAbS19_I14570	Cytochrome b/b6, N-terminal:Cytochrome b/b6, C-terminal	COG1290C	GO:0005506|GO:0005746|GO:0006118|GO:0006118|GO:0006118|GO:0006810|GO:0008121|GO:0016020|GO:0016020|GO:0016020|GO:0016021|GO:0016491|GO:0016491|GO:0016491|GO:0046872
BAbS19_I14580	UBIQUINOL-CYTOCHROME C REDUCTASE IRON-SULFUR SUBUNIT	COG0723C	GO:0006118|GO:0006118|GO:0008121|GO:0008121|GO:0008121|GO:0016020|GO:0045285|GO:0045285
BAbS19_I14590	Uridine kinase:ABC transporter, transmembrane region:ATP/GTP-binding site motif A (P-loop):ABC transporter:AAA ATPase	COG1132V	GO:0000166|GO:0000166|GO:0005524|GO:0005524|GO:0005524|GO:0006810|GO:0016020|GO:0016020|GO:0016021|GO:0016021|GO:0016301|GO:0016887|GO:0017111|GO:0042626
BAbS19_I14600	ABC transporter, transmembrane region:ATP/GTP-binding site motif A (P-loop):ABC transporter:AAA ATPase	COG1132V	GO:0000166|GO:0000166|GO:0005524|GO:0005524|GO:0005524|GO:0006810|GO:0016020|GO:0016020|GO:0016021|GO:0016021|GO:0016887|GO:0017111|GO:0042626
BAbS19_I14610	tRNA/rRNA methyltransferase (SpoU)	COG0219J	GO:0003723|GO:0006396|GO:0008168|GO:0008173|GO:0016740
BAbS19_I14620	purine nucleoside permease	COG5042F	GO:0000004|GO:0005554|GO:0008372
BAbS19_I14630	hypothetical protein	-	GO:0000004|GO:0005554|GO:0008372
BAbS19_I14640	Coproporphyrinogen III oxidase	COG0408H	GO:0004109|GO:0004109|GO:0006779|GO:0016491
BAbS19_I14650	GCN5-related N-acetyltransferase	COG3153R	GO:0008080|GO:0008152|GO:0016740
BAbS19_I14660	ASPARTYL/ASPARAGINYL BETA-HYDROXYLASE	COG3555O	GO:0004597
BAbS19_I14670	lipid A-myristate beta-hydroxylase	COG3555O	GO:0000004|GO:0005554|GO:0008372
BAbS19_I14680	Polynucleotide adenylyltransferase	COG0617J	GO:0003723|GO:0004652|GO:0016740|GO:0016779|GO:0016779
BAbS19_I14690	MutT/nudix family protein	COG0492O	GO:0016787
BAbS19_I14700	hypothetical protein	COG3816S	GO:0000004|GO:0005554|GO:0008372
BAbS19_I14710	Chaperonin clpA/B:AAA ATPase	COG0714R	GO:0000166|GO:0000166|GO:0005524|GO:0016020|GO:0017111
BAbS19_I14720	Protein of unknown function DUF58	COG1721R	GO:0000004|GO:0005554|GO:0008372
BAbS19_I14730	RNA-binding region RNP-1 (RNA recognition motif):Blue (type 1) copper domain	-	GO:0000004|GO:0005554|GO:0008372
BAbS19_I14740	hypothetical protein	-	GO:0000004|GO:0005554|GO:0008372
BAbS19_I14750	GCN5-related N-acetyltransferase	COG3153R	GO:0008080|GO:0008152|GO:0016740
BAbS19_I14760	Glutathione S-transferase, C-terminal	COG0435O	GO:0004364|GO:0016740
BAbS19_I14770	OmpW family	COG3047M	GO:0000004|GO:0005554|GO:0008372
BAbS19_I14780	NUDIX hydrolase	COG0492O	GO:0016787|GO:0016787
BAbS19_I14790	putative phosphohydrolase, Icc family	COG1409R	GO:0000004|GO:0005554|GO:0008372
BAbS19_I14800	HMG-CoA lyase-like:Alpha-isopropylmalate/homocitrate synthase:Yeast 2-isopropylmalate synthase	COG0119E	GO:0003824|GO:0003824|GO:0003852|GO:0003852|GO:0008152|GO:0008415|GO:0009098|GO:0016740|GO:0016829|GO:0019752|GO:0046912
BAbS19_I14810	cation efflux family protein	COG0053P	GO:0006812|GO:0008324|GO:0016020
BAbS19_I14820	hypothetical protein	-	GO:0000004|GO:0005554|GO:0008372
BAbS19_I14830	Glutamine amidotransferase class-I:Carbamoyl-phosphate synthase, GATase domain:Anthranilate synthase component I and chorisma...	COG0144J	GO:0000162|GO:0003824|GO:0003824|GO:0004049|GO:0004049|GO:0004049|GO:0006541|GO:0006541|GO:0006541|GO:0008152|GO:0009058|GO:0009058|GO:0016740|GO:0016829|GO:0016874
BAbS19_I14840	hypothetical protein	-	GO:0000004|GO:0005554|GO:0008372
BAbS19_I14850	Bacterial regulatory proteins, AsnC family:Bacterial regulatory protein LysR, HTH motif	COG1522K	GO:0003677|GO:0003700|GO:0005622|GO:0006350|GO:0006355|GO:0006355|GO:0043565
BAbS19_I14860	Bacterial regulatory protein, MarR family	COG1846K	GO:0003677|GO:0003700|GO:0005622|GO:0006350|GO:0006355|GO:0006355
BAbS19_I14870	Major facilitator superfamily (MFS)	COG0476H	GO:0005215|GO:0006810|GO:0006810|GO:0016020|GO:0016020|GO:0016021|GO:0016021
BAbS19_I14880	methyltransferase	COG5459J	GO:0008168|GO:0016740
BAbS19_I14890	hypothetical protein	COG5345S	GO:0000004|GO:0005554|GO:0008372
BAbS19_I14900	hypothetical protein	-	GO:0000004|GO:0005554|GO:0008372
BAbS19_I14910	Substrate-binding region of ABC-type glycine betaine transport system	COG2113E	GO:0000004|GO:0005554|GO:0008372
BAbS19_I14920	Binding-protein-dependent transport systems inner membrane component	COG4176E	GO:0005215|GO:0006810|GO:0006810|GO:0016020|GO:0016021
BAbS19_I14930	ATP/GTP-binding site motif A (P-loop):ABC transporter:AAA ATPase	COG4175E	GO:0000166|GO:0000166|GO:0005524|GO:0005524|GO:0016020|GO:0016020|GO:0016887|GO:0017111
BAbS19_I14940	ATP/GTP-binding site motif A (P-loop):ABC transporter:AAA ATPase	COG4608E	GO:0000166|GO:0000166|GO:0005524|GO:0005524|GO:0006857|GO:0015031|GO:0015198|GO:0016020|GO:0016020|GO:0016887|GO:0017111
BAbS19_I14950	ATP/GTP-binding site motif A (P-loop):ABC transporter:AAA ATPase	COG0443O	GO:0000166|GO:0000166|GO:0005524|GO:0005524|GO:0016020|GO:0016020|GO:0016887|GO:0017111
BAbS19_I14960	Binding-protein-dependent transport systems inner membrane component:Sodium:dicarboxylate symporter	COG1172G	GO:0005215|GO:0006810|GO:0006810|GO:0016020|GO:0016021
BAbS19_I14970	Binding-protein-dependent transport systems inner membrane component	COG0600P	GO:0005215|GO:0006810|GO:0006810|GO:0016020|GO:0016021
BAbS19_I15010	Bacterial regulatory protein LysR, HTH motif:Bacterial regulatory protein, ArsR family	COG0640K	GO:0003677|GO:0003700|GO:0005622|GO:0006350|GO:0006355|GO:0006355
BAbS19_I15020	tRNA/rRNA methyltransferase (SpoU)	COG0566J	GO:0003723|GO:0006396|GO:0008168|GO:0008173|GO:0016740
BAbS19_I15030	tRNA (5-methylaminomethyl-2-thiouridylate)-methyltransferase	COG0482J	GO:0004808|GO:0004808|GO:0005737|GO:0008033|GO:0008168|GO:0016740
BAbS19_I15040	hypothetical protein	-	GO:0000004|GO:0005554|GO:0008372
BAbS19_I15050	hypothetical protein	-	GO:0000004|GO:0005554|GO:0008372
BAbS19_I15060	hypothetical protein	COG2388R	GO:0000004|GO:0005554|GO:0008372
BAbS19_I15070	hypothetical protein	-	GO:0000004|GO:0005554|GO:0008372
BAbS19_I15080	hypothetical protein	COG5400S	GO:0000004|GO:0005554|GO:0008372
BAbS19_I15090	hypothetical protein	COG5385S	GO:0000004|GO:0005554|GO:0008372
BAbS19_I15100	Response regulator receiver:Transcriptional regulatory protein, C terminal	COG0744M	GO:0000156|GO:0000156|GO:0000160|GO:0000160|GO:0000160|GO:0003677|GO:0003677|GO:0006350|GO:0006355|GO:0006355|GO:0006355
BAbS19_I15110	hypothetical protein	-	GO:0000004|GO:0005554|GO:0008372
BAbS19_I15120	DegT/DnrJ/EryC1/StrS aminotransferase	COG0399M	GO:0008483|GO:0016740
BAbS19_I15130	Oxidoreductase, N-terminal:Oxidoreductase, C-terminal	COG0673R	GO:0000004|GO:0005554|GO:0008372
BAbS19_I15140	Glycosyl transferase, family 25	COG3306M	GO:0009103|GO:0016740
BAbS19_I15150	PAS domain:ATP-binding region, ATPase-like:Histidine kinase A, N-terminal:Bacterial sensor protein, C-terminal:Histidine kinase	COG2202T	GO:0000155|GO:0004673|GO:0004871|GO:0005524|GO:0005524|GO:0007165|GO:0007165|GO:0016020|GO:0016301|GO:0016310|GO:0016772|GO:0018106
BAbS19_I15160	AsmA	COG2982M	GO:0000004|GO:0005554|GO:0008372
BAbS19_I15170	Binding-protein-dependent transport systems inner membrane component	COG1177E	GO:0005215|GO:0006810|GO:0006810|GO:0016020|GO:0016021
BAbS19_I15200	ATP/GTP-binding site motif A (P-loop):ABC transporter:AAA ATPase:Spermidine/putrescine ABC transporter ATP-binding subunit	COG3842E	GO:0000166|GO:0005524|GO:0005524|GO:0015417|GO:0015846|GO:0016020|GO:0016887|GO:0017111
BAbS19_I15210	Bacterial periplasmic spermidine/putrescine-binding protein:Bacterial extracellular solute-binding protein, family 1	COG0687E	GO:0005215|GO:0006810|GO:0030288
BAbS19_I15220	transcriptional regulator, Cro/CI family	COG3800R	GO:0043565
BAbS19_I15230	transcriptional regulator, Cro/CI family	-	GO:0043565
BAbS19_I15240	Isocitrate lyase and phosphorylmutase:Isocitrate lyase	COG2224C	GO:0003824|GO:0004451|GO:0004451|GO:0008152|GO:0016829|GO:0019752
BAbS19_I15250	hypothetical protein	-	GO:0000004|GO:0005554|GO:0008372
BAbS19_I15260	hypothetical protein	-	GO:0000004|GO:0005554|GO:0008372
BAbS19_I15270	Short-chain dehydrogenase/reductase SDR:Glucose/ribitol dehydrogenase	-	GO:0008152|GO:0008152|GO:0008709|GO:0016491|GO:0016491|GO:0016491
BAbS19_I15280	Short-chain dehydrogenase/reductase SDR:Glucose/ribitol dehydrogenase	COG1027E	GO:0008152|GO:0016491|GO:0016491
BAbS19_I15310	MULTIPLE ANTIBIOTIC RESISTANCE PROTEIN MARC	COG2095U	GO:0000004|GO:0005554|GO:0008372
BAbS19_I15320	OmpA-like transmembrane domain	COG3637M	GO:0016021
BAbS19_I15330	Patatin	-	GO:0000004|GO:0005554|GO:0008372
BAbS19_I15340	hypothetical protein	-	GO:0000004|GO:0005554|GO:0008372
BAbS19_I15350	hypothetical protein	-	GO:0000004|GO:0005554|GO:0008372
BAbS19_I15360	dihydroxyacetone kinase family	COG2376G	GO:0016301
BAbS19_I15390	DIHYDROXYACETONE KINASE	COG2376G	GO:0004371
BAbS19_I15400	DIHYDROXYACETONE KINASE	COG2376G	GO:0004371
BAbS19_I15410	Short-chain dehydrogenase/reductase SDR:Glucose/ribitol dehydrogenase	COG1027E	GO:0008152|GO:0008152|GO:0016491|GO:0016491|GO:0016491
BAbS19_I15420	Periplasmic binding protein/LacI transcriptional regulator	COG1879G	GO:0000004|GO:0005554|GO:0008372
BAbS19_I15430	Bacterial inner-membrane translocator:Voltage-dependent potassium channel	COG1172G	GO:0005216
BAbS19_I15440	RbsA-2, ribose ABC transporter, ATP-binding protein	COG1129G	GO:0000166|GO:0000166|GO:0005524|GO:0005524|GO:0016020|GO:0016020|GO:0016887|GO:0017111
BAbS19_I15450	hypothetical protein	COG5591S	GO:0000004|GO:0005554|GO:0008372
BAbS19_I15460	hypothetical protein	-	GO:0000004|GO:0005554|GO:0008372
BAbS19_I15470	Glucose-methanol-choline oxidoreductase:GMC oxidoreductase	COG2303E	GO:0006066|GO:0006118|GO:0016491|GO:0016614|GO:0050660
BAbS19_I15480	hypothetical protein	-	GO:0000004|GO:0005554|GO:0008372
BAbS19_I15490	Bacterial regulatory proteins, IclR family	COG1414K	GO:0003677|GO:0006355
BAbS19_I15500	Aldehyde dehydrogenase	COG1012C	GO:0009013|GO:0016491|GO:0016491|GO:0016620
BAbS19_I15510	hypothetical protein	COG1238S	GO:0000004|GO:0005554|GO:0008372
BAbS19_I15520	Basic helix-loop-helix dimerization domain bHLH	COG1495O	GO:0000004|GO:0005554|GO:0008372
BAbS19_I15530	HNH endonuclease:HNH nuclease	COG1403V	GO:0004519
BAbS19_I15540	HhH-GPD	COG0122L	GO:0003905|GO:0005622|GO:0006284|GO:0008152|GO:0016787|GO:0016798|GO:0043565
BAbS19_I15550	Glutamyl-tRNA synthetase, class Ic:Aminoacyl-tRNA synthetase, class I	COG0008J	GO:0004812|GO:0004812|GO:0004818|GO:0005524|GO:0005524|GO:0006418|GO:0006424
BAbS19_I15560	Malate synthase:ATP/GTP-binding site motif A (P-loop):Malate synthase G	COG2225C	GO:0004474|GO:0004474|GO:0004474|GO:0006097|GO:0006097|GO:0006099|GO:0008415|GO:0016740
BAbS19_I15570	GCN5-related N-acetyltransferase	COG1247M	GO:0008080|GO:0008152|GO:0008415|GO:0016740
BAbS19_I15580	Sigma-70 factor family:Sigma-70 region 2:Sigma-70 region 4	COG0568K	GO:0003677|GO:0003677|GO:0003677|GO:0003700|GO:0003700|GO:0003700|GO:0006352|GO:0006352|GO:0006352|GO:0006355|GO:0006355|GO:0006355|GO:0008270|GO:0009408|GO:0016987|GO:0016987|GO:0016987
BAbS19_I15590	ribosomal large subunit pseudouridine synthase, RluD subfamily	COG0564J	GO:0003723|GO:0003723|GO:0003723|GO:0004730|GO:0004730|GO:0006364|GO:0006396|GO:0009982|GO:0016853
BAbS19_I15600	hypothetical protein	-	GO:0000004|GO:0005554|GO:0008372
BAbS19_I15610	FERRIC UPTAKE REGULATION PROTEIN	COG0735P	GO:0003677|GO:0003700|GO:0005506|GO:0006350|GO:0006355|GO:0006355
BAbS19_I15620	SENSORY TRANSDUCTION HISTIDINE KINASE	COG3920T	GO:0000155|GO:0000160|GO:0006355|GO:0007165
BAbS19_I15640	Response regulator receiver	COG0784T	GO:0000156|GO:0000160|GO:0006355
BAbS19_I15650	Sigma factor, ECF subfamily:Sigma-70 region 2:Sigma-70 region 4	COG1595K	GO:0003677|GO:0003677|GO:0003677|GO:0003700|GO:0003700|GO:0006350|GO:0006352|GO:0006352|GO:0006355|GO:0006355|GO:0006355|GO:0006355|GO:0016987|GO:0016987|GO:0016987
BAbS19_I15660	sensor histidine kinase	COG3920T	GO:0000160|GO:0004673|GO:0005524|GO:0016020|GO:0016021|GO:0016301|GO:0018106
BAbS19_I15670	hypothetical protein	-	GO:0000004|GO:0005554|GO:0008372
BAbS19_I15680	DNA gyrase, subunit B	-	GO:0000004|GO:0005554|GO:0008372
BAbS19_I15690	hypothetical protein	-	GO:0000004|GO:0005554|GO:0008372
BAbS19_I15700	hypothetical protein	-	GO:0000004|GO:0005554|GO:0008372
BAbS19_I15710	MotA/TolQ/ExbB proton channel	COG0811U	GO:0006810|GO:0015031|GO:0016021
BAbS19_I15720	Biopolymer transport protein ExbD/TolR	COG0848U	GO:0006810|GO:0015031|GO:0016021
BAbS19_I15730	ATP/GTP-binding site motif A (P-loop):Proline-rich extensin:Gram-negative bacterial tonB protein:TonB, C-terminal	COG0810M	GO:0008565|GO:0015031|GO:0016020|GO:0030288
BAbS19_I15740	hypothetical protein	COG3698S	GO:0000004|GO:0005554|GO:0008372
BAbS19_I15750	Protein of unknown function DUF214	COG0577V	GO:0000166|GO:0000166|GO:0004807|GO:0005524|GO:0005524|GO:0006810|GO:0008152|GO:0016020|GO:0016020|GO:0016021|GO:0016787|GO:0016887|GO:0017111|GO:0046677
BAbS19_I15760	ATP/GTP-binding site motif A (P-loop):ABC transporter:AAA ATPase:Phosphoribulokinase	COG1136V	GO:0000004|GO:0005554|GO:0008372
BAbS19_I15770	Secretion protein HlyD	COG0845M	GO:0008565|GO:0009306|GO:0016020
BAbS19_I15780	DeoxyUTP pyrophosphatase:DeoxyUTP pyrophosphatase, subfamily 1:DeoxyUTP pyrophosphatase, subfamily 2	COG0756F	GO:0004170|GO:0004170|GO:0006220|GO:0009117|GO:0009117|GO:0016787|GO:0016787|GO:0016787|GO:0046080
BAbS19_I15790	Bacterial regulatory proteins, AsnC family:Helix-turn-helix, Fis-type	COG1522K	GO:0003700|GO:0005622|GO:0006355|GO:0043565
BAbS19_I15800	hypothetical protein	-	GO:0000004|GO:0005554|GO:0008372
BAbS19_I15810	Glutamine amidotransferase, class-II	COG0121R	GO:0004044|GO:0006541|GO:0009113|GO:0016740
BAbS19_I15820	hypothetical protein	COG1633S	GO:0016491|GO:0046914
BAbS19_I15830	Thromboxane receptor:General substrate transporter:Major facilitator superfamily (MFS)	COG0476H	GO:0004872|GO:0005215|GO:0006810|GO:0006810|GO:0016020|GO:0016020|GO:0016021|GO:0016021
BAbS19_I15840	Basic-leucine zipper (bZIP) transcription factor	-	GO:0000004|GO:0005554|GO:0008372
BAbS19_I15850	hypothetical protein	-	GO:0000004|GO:0005554|GO:0008372
BAbS19_I15860	adenylosuccinate synthetase	COG0104F	GO:0000166|GO:0000287|GO:0000287|GO:0004019|GO:0004019|GO:0004019|GO:0005525|GO:0005525|GO:0005525|GO:0006164|GO:0006164|GO:0006164|GO:0016874|GO:0046872
BAbS19_I15870	GCN5-related N-acetyltransferase	-	GO:0008080|GO:0008152|GO:0016740
BAbS19_I15880	ATP/GTP-binding site motif A (P-loop):Amino acid-binding ACT:D-isomer specific 2-hydroxyacid dehydrogenase, catalytic domain:...	COG0110R	GO:0004617|GO:0004617|GO:0006564|GO:0016491|GO:0016616|GO:0048037
BAbS19_I15890	Sugar transporter superfamily:Phosphoserine aminotransferase, Methanosarcina type	COG1931S	GO:0004648|GO:0005351|GO:0008483|GO:0009058|GO:0016740
BAbS19_I15900	Bile acid:sodium symporter	COG0385R	GO:0006814|GO:0008508|GO:0016020
BAbS19_I15910	heat resistant agglutinin 1 precursor	COG3637M	GO:0000004|GO:0005554|GO:0008372
BAbS19_I15920	PHOSPHOGLUCOSAMINE MUTASE / PHOSPHOACETYLGLUCOSAMINE MUTASE / PHOSPHOMANNOMUTASE	COG1109G	GO:0000287|GO:0005975|GO:0008966|GO:0008966|GO:0016853|GO:0016868|GO:0046872
BAbS19_I15930	Peptidase M41:ATP/GTP-binding site motif A (P-loop):AAA ATPase:AAA ATPase, central region:AAA-protein subdomain:ATP-dependent...	COG0465O	GO:0000166|GO:0000166|GO:0004222|GO:0005524|GO:0005524|GO:0007049|GO:0008233|GO:0008237|GO:0008270|GO:0016020|GO:0016020|GO:0016787|GO:0017111|GO:0030163|GO:0046872|GO:0051301
BAbS19_I15940	hypothetical protein	COG0037D	GO:0005524|GO:0005524|GO:0008033|GO:0008033|GO:0016879|GO:0016879
BAbS19_I15950	TPR repeat:Molluscan rhodopsin C-terminal tail	COG1729S	GO:0005488
BAbS19_I15960	MotY protein:Bacterial outer membrane protein:OmpA/MotB domain	COG2885M	GO:0009279|GO:0009279|GO:0009279|GO:0016021|GO:0016021
BAbS19_I15970	TolB, N-terminal	COG0823U	GO:0006810|GO:0015031|GO:0017038|GO:0042597
BAbS19_I15980	Proline-rich region:Proline-rich extensin:Histamine H3 receptor	-	GO:0004872
BAbS19_I15990	Biopolymer transport protein ExbD/TolR	COG0848U	GO:0006810|GO:0015031|GO:0016021
BAbS19_I16000	MotA/TolQ/ExbB proton channel	COG0811U	GO:0006810|GO:0015031|GO:0016021
BAbS19_I16010	hypothetical protein	COG0824R	GO:0016787
BAbS19_I16020	CbxX/CfqX superfamily:Disease resistance protein:ATP/GTP-binding site motif A (P-loop):AAA ATPase:AAA ATPase, central region:...	COG2255L	GO:0000166|GO:0000166|GO:0003677|GO:0004386|GO:0005524|GO:0005524|GO:0005524|GO:0005524|GO:0006281|GO:0006281|GO:0006281|GO:0006281|GO:0006310|GO:0006310|GO:0006310|GO:0006974|GO:0009378|GO:0009378|GO:0009432|GO:0009432|GO:0016787|GO:0017111
BAbS19_I16030	Bacterial DNA recombination protein, RuvA:Helix-hairpin-helix DNA-binding, class 1	COG0632L	GO:0003677|GO:0003678|GO:0005622|GO:0006281|GO:0006310|GO:0043565
BAbS19_I16040	Crossover junction endodeoxyribonuclease RuvC	COG0817L	GO:0004520|GO:0006281|GO:0006310|GO:0008821|GO:0016787|GO:0016978
BAbS19_I16050	hypothetical protein	COG5317S	GO:0000004|GO:0005554|GO:0008372
BAbS19_I16060	OPGC	COG4645S	GO:0000004|GO:0005554|GO:0008372
BAbS19_I16070	thiamine-phosphate pyrophosphorylase, putative	COG0352H	GO:0000287|GO:0003824|GO:0004789|GO:0004789|GO:0004789|GO:0008152|GO:0009228|GO:0009228|GO:0016740
BAbS19_I16080	Sel1-like repeat	COG0790R	GO:0005488
BAbS19_I16090	Elongation factor P (EF-P)	COG0231J	GO:0003746|GO:0003746|GO:0003746|GO:0005737|GO:0006412|GO:0006414|GO:0006414
BAbS19_I16100	Inositol phosphatase/fructose-1,6-bisphosphatase:Inositol monophosphatase	COG0483G	GO:0004437|GO:0008934|GO:0016787
BAbS19_I16110	hypothetical protein	-	GO:0000004|GO:0005554|GO:0008372
BAbS19_I16120	hypothetical protein	-	GO:0000004|GO:0005554|GO:0008372
BAbS19_I16130	OmpA/MotB domain	COG1360N	GO:0009279
BAbS19_I16140	PROBABLE TRANSPORT ATP-BINDING PROTEIN MSBA	COG1132V	GO:0000166|GO:0000166|GO:0005524|GO:0005524|GO:0005524|GO:0006810|GO:0016020|GO:0016020|GO:0016021|GO:0016021|GO:0016887|GO:0017111|GO:0042626
BAbS19_I16150	Ribosomal protein L31	COG0254J	GO:0003723|GO:0003735|GO:0005622|GO:0005840|GO:0006412|GO:0006412|GO:0019843|GO:0030529
BAbS19_I16160	Protein of unknown function DUF28	COG0217S	GO:0000004|GO:0005554|GO:0008372
BAbS19_I16170	Bacterial regulatory protein, GntR family	COG1802K	GO:0003677|GO:0003700|GO:0005622|GO:0006350|GO:0006355|GO:0006355
BAbS19_I16180	BioY protein	COG1268R	GO:0000004|GO:0005554|GO:0008372
BAbS19_I16190	2Fe-2S ferredoxins, iron-sulfur binding protein	COG3543S	GO:0000004|GO:0005554|GO:0008372
BAbS19_I16200	RNA-binding region RNP-1 (RNA recognition motif):Integral membrane protein TerC family	COG0861P	GO:0000004|GO:0005554|GO:0008372
BAbS19_I16210	Metallo-phosphoesterase:Conserved hypothetical protein 282	COG1692S	GO:0000004|GO:0005554|GO:0008372
BAbS19_I16220	5-formyltetrahydrofolate cyclo-ligase	COG0212H	GO:0003824|GO:0008152|GO:0016874
BAbS19_I16230	Protein of unknown function DUF710	COG3027S	GO:0000004|GO:0005554|GO:0008372
BAbS19_I16240	hypothetical protein	-	GO:0000004|GO:0005554|GO:0008372
BAbS19_I16250	Transketolase, N terminal:Transketolase, central region:Transketolase, C terminal:Bacterial transketolase	COG0021G	GO:0004802|GO:0004802|GO:0016740
BAbS19_I16260	Glyceraldehyde 3-phosphate dehydrogenase:TrkA potassium uptake protein:Glyceraldehyde-3-phosphate dehydrogenase, type I	COG0057G	GO:0004365|GO:0004365|GO:0006006|GO:0006096|GO:0008943|GO:0016491|GO:0051287|GO:0051287
BAbS19_I16270	phosphoglycerate kinase	COG0126G	GO:0000166|GO:0004618|GO:0004618|GO:0004618|GO:0005524|GO:0006096|GO:0006096|GO:0006096|GO:0016301|GO:0016740
BAbS19_I16280	hypothetical protein	-	GO:0000004|GO:0005554|GO:0008372
BAbS19_I16290	AMP-dependent synthetase and ligase	COG0365I	GO:0003824|GO:0008152|GO:0016874|GO:0050218
BAbS19_I16300	Glucose/ribitol dehydrogenase	-	GO:0008152|GO:0016491|GO:0016491
BAbS19_I16310	hypothetical protein	-	GO:0000004|GO:0005554|GO:0008372
BAbS19_I16320	Bacterial regulatory protein, DeoR family	COG2378K	GO:0003677|GO:0003700|GO:0005622|GO:0006350|GO:0006355|GO:0006355
BAbS19_I16330	hypothetical protein	-	GO:0000004|GO:0005554|GO:0008372
BAbS19_I16340	Phenylacetic acid degradation-related protein:Thioesterase superfamily	COG2050Q	GO:0000004|GO:0005554|GO:0008372
BAbS19_I16350	hypothetical protein	COG3820S	GO:0000004|GO:0005554|GO:0008372
BAbS19_I16360	alcohol dehydrogenase, zinc-containing	COG0603R	GO:0008270|GO:0016491
BAbS19_I16370	hypothetical protein	COG5509S	GO:0000004|GO:0005554|GO:0008372
BAbS19_I16400	Protein of unknown function DUF465	COG5570S	GO:0000004|GO:0005554|GO:0008372
BAbS19_I16410	Protein of unknown function DUF465	COG5481S	GO:0000004|GO:0005554|GO:0008372
BAbS19_I16420	1-(5-Phosphoribosyl)-5-amino-4-imidazole-carboxyl ate (AIR) carboxylase	COG0041F	GO:0004638|GO:0004638|GO:0006189|GO:0009320|GO:0016829
BAbS19_I16430	phosphoribosylaminoimidazole carboxylase	COG0026F	GO:0000166|GO:0003824|GO:0003824|GO:0003824|GO:0004638|GO:0005524|GO:0005524|GO:0005524|GO:0005524|GO:0006164|GO:0006189|GO:0009320|GO:0016829|GO:0016831
BAbS19_I16440	Ribosomal protein L36	COG0257J	GO:0003735|GO:0005622|GO:0005840|GO:0006412|GO:0030529
BAbS19_I16450	TPR repeat	COG0457R	GO:0005488
BAbS19_I16460	ATP/GTP-binding site motif A (P-loop):Pyruvate kinase	COG0469G	GO:0000287|GO:0004743|GO:0004743|GO:0006096|GO:0006096|GO:0016301|GO:0016740|GO:0016772
BAbS19_I16470	hypothetical protein	COG5480S	GO:0000004|GO:0005554|GO:0008372
BAbS19_I16480	N-formylglutamate amidohydrolase	COG3931E	GO:0016787
BAbS19_I16490	Hypothetical Cytosolic Protein	COG3750S	GO:0000166|GO:0004812|GO:0005524|GO:0006412|GO:0016874
BAbS19_I16500	H+-transporting two-sector ATPase, A subunit:ATP/GTP-binding site motif A (P-loop):ABC transporter:AAA ATPase	COG0488R	GO:0000166|GO:0000166|GO:0005524|GO:0005524|GO:0016020|GO:0016020|GO:0016887|GO:0017111
BAbS19_I16510	lipoprotein, putative	-	GO:0000004|GO:0005554|GO:0008372
BAbS19_I16520	Thiamin pyrophosphokinase, catalytic domain	COG1564H	GO:0004788|GO:0006772|GO:0016301
BAbS19_I16530	Thiamine ABC transporter periplasmic binding protein:Proteobacterial thiamine ABC transporter, periplasmic binding protein:Ba...	COG4143H	GO:0005215|GO:0005215|GO:0005524|GO:0006810|GO:0006810|GO:0006810|GO:0030288|GO:0030288|GO:0042626
BAbS19_I16540	Binding-protein-dependent transport systems inner membrane component:Thiamine ABC transporter, permease protein	COG1178P	GO:0005215|GO:0005215|GO:0006810|GO:0006810|GO:0006810|GO:0009276|GO:0016020|GO:0016021|GO:0016021
BAbS19_I16550	ATP/GTP-binding site motif A (P-loop):ABC transporter:AAA ATPase:Thiamine ABC transporter, ATP-binding protein	COG3840H	GO:0000166|GO:0000166|GO:0005524|GO:0005524|GO:0005524|GO:0006810|GO:0006810|GO:0009276|GO:0016020|GO:0016020|GO:0016787|GO:0016887|GO:0017111|GO:0042626
BAbS19_I16560	Peptidase family M48:Neutral zinc metallopeptidase, zinc-binding region	COG4784R	GO:0000004|GO:0005554|GO:0008372
BAbS19_I16570	MOSC domain	COG2258S	GO:0016772
BAbS19_I16580	Sigma-70 factor family:Sigma-70 region 2:Sigma-70 region 4	COG0568K	GO:0003677|GO:0003677|GO:0003677|GO:0003700|GO:0003700|GO:0006350|GO:0006352|GO:0006352|GO:0006355|GO:0006355|GO:0006355|GO:0006355|GO:0016987|GO:0016987|GO:0016987
BAbS19_I16590	hypothetical protein	-	GO:0000004|GO:0005554|GO:0008372
BAbS19_I16600	Transcription factor CarD	COG1329K	GO:0000004|GO:0005554|GO:0008372
BAbS19_I16610	7Fe ferredoxin:4Fe-4S ferredoxin, iron-sulfur binding domain	COG1146C	GO:0005506|GO:0005506|GO:0005506|GO:0006118|GO:0006118|GO:0006118|GO:0006810|GO:0009055|GO:0009055|GO:0016020|GO:0046872|GO:0051536|GO:0051538|GO:0051539
BAbS19_I16620	hypothetical protein	-	GO:0000004|GO:0005554|GO:0008372
BAbS19_I16630	RNA-binding S4	COG1188J	GO:0003723|GO:0003723
BAbS19_I16640	DEAD/DEAH box helicase:Helicase, C-terminal:ATP/GTP-binding site motif A (P-loop):Aldehyde dehydrogenase	COG0511I	GO:0003676|GO:0004386|GO:0004386|GO:0005524
BAbS19_I16650	Thiolase	COG0183I	GO:0003985|GO:0008415|GO:0016740
BAbS19_I16660	hypothetical protein	-	GO:0000004|GO:0005554|GO:0008372
BAbS19_I16670	Domain of unknown function DUF336	COG3193R	GO:0000004|GO:0005554|GO:0008372
BAbS19_I16680	Ribosomal L32p protein:Ribosomal protein S32, bacterial and organelle form	COG0333J	GO:0003735|GO:0006412|GO:0015934
BAbS19_I16690	Glycosyl transferase, family 51	COG0744M	GO:0003824|GO:0009252|GO:0009252|GO:0009274|GO:0009274|GO:0016021|GO:0016740|GO:0016757|GO:0016763
BAbS19_I16700	Polyprenyl synthetase	COG0142H	GO:0004337|GO:0008299|GO:0016740
BAbS19_I16710	IspG protein:GcpE protein	COG0821I	GO:0016114
BAbS19_I16720	Eukaryotic thiol (cysteine) protease:Short-chain dehydrogenase/reductase SDR:Glucose/ribitol dehydrogenase	COG1027E	GO:0003858|GO:0003858|GO:0008152|GO:0008152|GO:0008233|GO:0016491|GO:0016491|GO:0016491
BAbS19_I16730	membrane protein MosC	COG0476H	GO:0005215|GO:0006810|GO:0006810|GO:0016020|GO:0016020|GO:0016021|GO:0016021
BAbS19_I16740	Biotin/lipoyl attachment:HMG-CoA lyase-like:Biotin-requiring enzyme, attachment site:Conserved carboxylase region:Carbamoyl-p...	COG1038C	GO:0003824|GO:0003824|GO:0003824|GO:0003824|GO:0003824|GO:0004736|GO:0004736|GO:0005524|GO:0005524|GO:0005524|GO:0005524|GO:0005737|GO:0006094|GO:0008152|GO:0009374|GO:0016829|GO:0016874|GO:0016874
BAbS19_I16750	Leu/Ile/Val-binding protein family:Extracellular ligand-binding receptor	COG0683E	GO:0004872|GO:0005279|GO:0006865|GO:0030288
BAbS19_I16760	Leu/Ile/Val-binding protein family:Extracellular ligand-binding receptor	COG0683E	GO:0004872|GO:0005279|GO:0006865|GO:0030288
BAbS19_I16770	hypothetical protein	-	GO:0000004|GO:0005554|GO:0008372
BAbS19_I16780	ATP/GTP-binding site motif A (P-loop):Mitochondrial substrate carrier:ABC transporter:AAA ATPase	COG0410E	GO:0000166|GO:0000166|GO:0005524|GO:0005524|GO:0016020|GO:0016020|GO:0016887|GO:0017111
BAbS19_I16790	HIGH-AFFINITY BRANCHED-CHAIN AMINO ACID TRANSPORT ATP-BINDING PROTEIN BRAF	COG0411E	GO:0000166|GO:0000166|GO:0005524|GO:0005524|GO:0016020|GO:0016020|GO:0016887|GO:0017111
BAbS19_I16800	Bacterial inner-membrane translocator	COG4177E	GO:0000004|GO:0005554|GO:0008372
BAbS19_I16810	HIGH-AFFINITY BRANCHED-CHAIN AMINO ACID TRANSPORT SYSTEM PERMEASE PROTEIN LIVH	COG0559E	GO:0000004|GO:0005554|GO:0008372
BAbS19_I16820	proline racemase, putative	COG3938E	GO:0000004|GO:0005554|GO:0008372
BAbS19_I16830	NAD binding site:TrkA potassium uptake protein	COG0665E	GO:0008718|GO:0016491
BAbS19_I16840	Bacterial regulatory protein, GntR family	COG1802K	GO:0003677|GO:0003700|GO:0005622|GO:0006350|GO:0006355|GO:0006355
BAbS19_I16850	Bacterial regulatory protein, MarR family	COG1846K	GO:0003677|GO:0003700|GO:0005622|GO:0006350|GO:0006355|GO:0006355
BAbS19_I16860	hypothetical protein	-	GO:0000004|GO:0005554|GO:0008372
BAbS19_I16870	H+-transporting two-sector ATPase, delta/epsilon subunit	COG0355C	GO:0005524|GO:0006754|GO:0006810|GO:0006811|GO:0015078|GO:0015986|GO:0015992|GO:0016020|GO:0016020|GO:0016469|GO:0016787|GO:0042777|GO:0045261|GO:0046872|GO:0046933|GO:0046933|GO:0046961
BAbS19_I16880	Antifreeze protein, type I:H+-transporting two-sector ATPase, alpha/beta subunit, central region:H+-transporting two-sector A...	COG0055C	GO:0000166|GO:0000166|GO:0005524|GO:0005524|GO:0005524|GO:0006754|GO:0006754|GO:0006754|GO:0006810|GO:0006811|GO:0008553|GO:0015078|GO:0015986|GO:0015986|GO:0015986|GO:0015986|GO:0015992|GO:0016020|GO:0016020|GO:0016021|GO:0016469|GO:0016469|GO:0016469|GO:0016787|GO:0017111|GO:0042777|GO:0045255|GO:0045261|GO:0046872|GO:0046933|GO:0046933|GO:0046933|GO:0046933|GO:0046933|GO:0046961|GO:0046961|GO:…
BAbS19_I16890	H+-transporting two-sector ATPase, gamma subunit	COG0224C	GO:0006754|GO:0006810|GO:0006811|GO:0015078|GO:0015986|GO:0015992|GO:0016020|GO:0016469|GO:0016787|GO:0045261|GO:0046872|GO:0046933|GO:0046961
BAbS19_I16900	H+-transporting two-sector ATPase, alpha/beta subunit, central region:H+-transporting two-sector ATPase, alpha subunit, C-ter...	COG0056C	GO:0000166|GO:0005524|GO:0005524|GO:0005524|GO:0006754|GO:0006754|GO:0006810|GO:0006811|GO:0015078|GO:0015986|GO:0015986|GO:0015986|GO:0015986|GO:0015992|GO:0016020|GO:0016020|GO:0016469|GO:0016469|GO:0016469|GO:0016469|GO:0016787|GO:0016820|GO:0042777|GO:0045261|GO:0046872|GO:0046933|GO:0046933|GO:0046933|GO:0046933|GO:0046961|GO:0046961|GO:0046961
BAbS19_I16910	H+-transporting two-sector ATPase, delta (OSCP) subunit	COG0712C	GO:0006754|GO:0006810|GO:0006811|GO:0015986|GO:0016469|GO:0016787|GO:0045261|GO:0046872|GO:0046933|GO:0046961
BAbS19_I16920	hypothetical protein	-	GO:0000004|GO:0005554|GO:0008372
BAbS19_I16930	DEAD/DEAH box helicase:Helicase, C-terminal:ATP/GTP-binding site motif A (P-loop):Primosomal protein n	COG1198L	GO:0000166|GO:0003677|GO:0004386|GO:0005524|GO:0006260
BAbS19_I16940	Transaldolase:Transaldolase C	COG0176G	GO:0003824|GO:0004801|GO:0005975|GO:0005975|GO:0008152|GO:0016740
BAbS19_I16950	hypothetical protein	COG5468S	GO:0000004|GO:0005554|GO:0008372
BAbS19_I16960	Aminoacyl-tRNA synthetase, class I:Aminoacyl-tRNA synthetase, class Ia:Leucyl-tRNA synthetase bacterial/mitochondrial, class Ia	COG0495J	GO:0000166|GO:0004812|GO:0004812|GO:0004823|GO:0004823|GO:0005524|GO:0005524|GO:0005524|GO:0006412|GO:0006418|GO:0006429|GO:0016874
BAbS19_I16970	hypothetical protein	COG0325R	GO:0000004|GO:0005554|GO:0008372
BAbS19_I16980	fusaric acid resistance protein FusB / fusaric acid resistance protein FusC	COG1289S	GO:0000004|GO:0005554|GO:0008372
BAbS19_I16990	usg protein, putative	COG5425E	GO:0000004|GO:0005554|GO:0008372
BAbS19_I17000	AMP-dependent synthetase and ligase	COG0365I	GO:0003824|GO:0003987|GO:0003987|GO:0008152|GO:0016208|GO:0016874
BAbS19_I17010	hypothetical protein	COG5508S	GO:0000004|GO:0005554|GO:0008372
BAbS19_I17020	C-5 cytosine-specific DNA methylase:Peptidase family M48:Neutral zinc metallopeptidase, zinc-binding region	COG0501O	GO:0008168|GO:0008233|GO:0008237|GO:0008270|GO:0016787
BAbS19_I17030	SAM (and some other nucleotide) binding motif:Bacterial Sun/eukaryotic nucleolar Nop1/Nop2:Antitermination protein NusB:NusB ...	COG0144J	GO:0003723|GO:0006355|GO:0008168|GO:0016740
BAbS19_I17040	Hypothetical Cytosolic Protein	COG5360S	GO:0000004|GO:0005554|GO:0008372
BAbS19_I17050	AICARFT/IMPCHase bienzyme:Methylglyoxal synthase-like domain	COG0138F	GO:0003937|GO:0004643|GO:0004643|GO:0006164|GO:0016740
BAbS19_I17060	TRANSPORTER	COG2270R	GO:0005215|GO:0006810|GO:0006810|GO:0016020|GO:0016020|GO:0016021|GO:0016021
BAbS19_I17070	TRANSPORTER	COG2270R	GO:0005215|GO:0006810|GO:0006810|GO:0016020|GO:0016020|GO:0016021|GO:0016021
BAbS19_I17080	ATP/GTP-binding site motif A (P-loop):Bacterial NAD-glutamate dehydrogenase	COG2902E	GO:0004352|GO:0016491
BAbS19_I17090	hypothetical protein	COG3762S	GO:0000004|GO:0005554|GO:0008372
BAbS19_I17100	Protein of unknown function DUF477	COG1512R	GO:0000004|GO:0005554|GO:0008372
BAbS19_I17110	LemA family	COG1704S	GO:0000004|GO:0005554|GO:0008372
BAbS19_I17120	hypothetical protein	-	GO:0000004|GO:0005554|GO:0008372
BAbS19_I17130	Antifreeze protein, type I:Ribosomal protein S16	COG0228J	GO:0003735|GO:0005622|GO:0005840|GO:0006412|GO:0006412|GO:0030529
BAbS19_I17140	Chorismate mutase	COG1605E	GO:0004106|GO:0004106|GO:0009073|GO:0016853
BAbS19_I17150	Disease resistance protein:GTP-binding signal recognition particle (SRP54) G-domain:ATP/GTP-binding site motif A (P-loop):AAA...	COG0541U	GO:0000166|GO:0000166|GO:0003723|GO:0003723|GO:0003723|GO:0003723|GO:0005524|GO:0005525|GO:0005525|GO:0005786|GO:0005786|GO:0005786|GO:0006605|GO:0006614|GO:0006614|GO:0006614|GO:0016020|GO:0016020|GO:0017111
BAbS19_I17160	lytic murein transglycosylase, putative	COG2951M	GO:0000004|GO:0005554|GO:0008372
BAbS19_I17170	CARBONIC ANHYDRASE	COG0288P	GO:0004089|GO:0004089|GO:0008270|GO:0008270|GO:0015976|GO:0016829
BAbS19_I17180	Pyridoxal kinase	COG2240H	GO:0008478|GO:0008478|GO:0016301|GO:0016740
BAbS19_I17190	hypothetical protein	-	GO:0000004|GO:0005554|GO:0008372
BAbS19_I17200	ATP/GTP-binding site motif A (P-loop):Aldehyde dehydrogenase	COG1012C	GO:0004491|GO:0004491|GO:0006573|GO:0016491|GO:0016491
BAbS19_I17210	TRANSCRIPTIONAL REGULATORY PROTEIN, LYSR FAMILY	COG0583K	GO:0003677|GO:0003700|GO:0006350|GO:0006355|GO:0006355
BAbS19_I17220	hypothetical protein	COG3619S	GO:0000004|GO:0005554|GO:0008372
BAbS19_I17230	Transglycosylase-associated protein	COG2261S	GO:0000004|GO:0005554|GO:0008372
BAbS19_I17240	NUDIX hydrolase	COG0492O	GO:0016787|GO:0016787|GO:0016818
BAbS19_I17250	carboxyl-terminal protease	COG0793M	GO:0004252|GO:0005515|GO:0006508|GO:0006508|GO:0008233|GO:0008236|GO:0008236|GO:0016787
BAbS19_I17260	Peptidase M23/M37	COG4942D	GO:0004222|GO:0006508
BAbS19_I17270	hypothetical protein	-	GO:0000004|GO:0005554|GO:0008372
BAbS19_I17280	Protein of unknown function DUF163	COG1576S	GO:0000004|GO:0005554|GO:0008372
BAbS19_I17290	iojap-related protein	COG0799S	GO:0000004|GO:0005554|GO:0008372
BAbS19_I17300	nicotinic acid mononucleotide adenyltransferase	COG1057H	GO:0004515|GO:0004515|GO:0009435|GO:0009435|GO:0016740|GO:0016779|GO:0016779|GO:0019363
BAbS19_I17310	gamma-glutamyl phosphate reductase	COG0014E	GO:0004350|GO:0004350|GO:0004350|GO:0004350|GO:0006561|GO:0006561|GO:0006561|GO:0006561|GO:0008652|GO:0016491|GO:0050661
BAbS19_I17320	Aspartate/glutamate/uridylate kinase:Glutamate 5-kinase:PUA domain:Glutamate 5-kinase, bacterial form	COG0263E	GO:0003723|GO:0004349|GO:0004349|GO:0004349|GO:0004349|GO:0004349|GO:0005737|GO:0005737|GO:0006561|GO:0006561|GO:0006561|GO:0006561|GO:0006561|GO:0008652|GO:0008652|GO:0016301|GO:0016740
BAbS19_I17330	Hemolysin-type calcium-binding region:ATP/GTP-binding site motif A (P-loop):GTP1/OBG:GTP1/OBG domain:GTP1/OBG sub-domain	COG0536R	GO:0005525|GO:0005525
BAbS19_I17340	hypothetical protein	-	GO:0000004|GO:0005554|GO:0008372
BAbS19_I17350	GCN5-related N-acetyltransferase	COG0452H	GO:0008080|GO:0008152|GO:0016740
BAbS19_I17360	GCN5-related N-acetyltransferase	COG1670J	GO:0008080|GO:0008152|GO:0016740
BAbS19_I17370	Regulator of chromosome condensation, RCC1:Ribosomal protein L27	COG0211J	GO:0003735|GO:0005622|GO:0005840|GO:0006412
BAbS19_I17380	Ribosomal protein L21	COG0261J	GO:0003723|GO:0003723|GO:0003735|GO:0005622|GO:0005840|GO:0006412|GO:0006412|GO:0019843|GO:0019843|GO:0030529
BAbS19_I17390	TRANSPOSASE	COG3316L	GO:0003677|GO:0015074
BAbS19_I17400	transcriptional regulator, Cro/CI family	COG1396K	GO:0003677|GO:0006350|GO:0006355|GO:0043565
BAbS19_I17410	AzlC protein	COG1296E	GO:0000004|GO:0005554|GO:0008372
BAbS19_I17420	TRANSPOSASE	COG3316L	GO:0003677|GO:0015074
BAbS19_I17430	transposase, putative	COG3316L	GO:0000004|GO:0005554|GO:0008372
BAbS19_I17440	hypothetical protein	-	GO:0000004|GO:0005554|GO:0008372
BAbS19_I17450	hypothetical protein	-	GO:0000004|GO:0005554|GO:0008372
BAbS19_I17460	hypothetical protein	-	GO:0000004|GO:0005554|GO:0008372
BAbS19_I17470	Peptidase M23/M37	COG0739M	GO:0004222|GO:0006508
BAbS19_I17480	ErfK/YbiS/YcfS/YnhG	COG1376S	GO:0000004|GO:0005554|GO:0008372
BAbS19_I17490	Chaperonin clpA/B:ATP/GTP-binding site motif A (P-loop):AAA ATPase:AAA ATPase, central region:Clp, N terminal	COG0542O	GO:0000166|GO:0000166|GO:0005524|GO:0005524|GO:0006457|GO:0006457|GO:0006986|GO:0017111
BAbS19_I17500	hypothetical protein	-	GO:0000004|GO:0005554|GO:0008372
BAbS19_I17510	METHYLTRANSFERASE	COG2890J	GO:0006479|GO:0008276
BAbS19_I17520	Class I peptide chain release factor domain:Peptide chain release factor 1:PCRF domain	COG0216J	GO:0003747|GO:0005737|GO:0005737|GO:0006412|GO:0006415|GO:0006415|GO:0006415|GO:0006415|GO:0016149|GO:0016149|GO:0016149
BAbS19_I17530	PEP-utilizing enzyme:Beta tubulin:GAF domain:Phosphoenolpyruvate-protein phosphotransferase	COG3605T	GO:0005351|GO:0005737|GO:0008965|GO:0008965|GO:0009401|GO:0016310|GO:0016310|GO:0016740|GO:0016772|GO:0016772|GO:0016772
BAbS19_I17540	Aspartate/glutamate/uridylate kinase:Glutamate 5-kinase:Aspartate kinase:Amino acid-binding ACT:Aspartate kinase, monofunctio...	COG0527E	GO:0004072|GO:0004072|GO:0004072|GO:0008652|GO:0008652|GO:0008652|GO:0008652|GO:0009058|GO:0009085|GO:0016301|GO:0016740|GO:0019877
BAbS19_I17550	SAM (and some other nucleotide) binding motif:Generic methyltransferase	COG2227H	GO:0006744|GO:0006744|GO:0006744|GO:0008168|GO:0008425|GO:0008689|GO:0008689|GO:0016740
BAbS19_I17560	TRANSPORTER, DME FAMILY	COG0696G	GO:0000004|GO:0005554|GO:0008372
BAbS19_I17570	hypothetical protein	COG5319S	GO:0000004|GO:0005554|GO:0008372
BAbS19_I17580	nitrilase/cyanide hydratase/apolipoprotein N-acyltransferase	COG0388R	GO:0006807|GO:0016810
BAbS19_I17590	Glutaredoxin:Thioredoxin type domain	COG0695O	GO:0006118|GO:0006118|GO:0009055|GO:0045454|GO:0045454
BAbS19_I17600	hypothetical protein	-	GO:0000004|GO:0005554|GO:0008372
BAbS19_I17610	competence protein F	COG1040R	GO:0016740|GO:0016757
BAbS19_I17620	hypothetical protein	COG0499H	GO:0000004|GO:0005554|GO:0008372
BAbS19_I17630	Blood group Rhesus C/E and D polypeptide:Sugar transporter superfamily:Major facilitator superfamily (MFS)	COG0476H	GO:0005215|GO:0005215|GO:0005351|GO:0006810|GO:0006810|GO:0006810|GO:0016020|GO:0016020|GO:0016020|GO:0016021|GO:0016021
BAbS19_I17640	Hypothetical Cytosolic Protein	COG4103S	GO:0005509
BAbS19_I17650	Hypothetical Cytosolic Protein	COG4103S	GO:0005509
BAbS19_I17660	hypothetical protein	COG3898S	GO:0000004|GO:0005554|GO:0008372
BAbS19_I17670	hypothetical protein	COG4223S	GO:0000004|GO:0005554|GO:0008372
BAbS19_I17680	Uroporphyrinogen III synthase HEM4	COG1587H	GO:0004852|GO:0004852|GO:0006779|GO:0006783|GO:0016829
BAbS19_I17690	Porphobilinogen deaminase	COG0181H	GO:0004418|GO:0004418|GO:0006779|GO:0016740
BAbS19_I17700	Glycoprotease (M22) metalloprotease	COG0533O	GO:0004175|GO:0006508|GO:0008233|GO:0008237|GO:0008270|GO:0008450|GO:0008450|GO:0016787
BAbS19_I17710	Adrenodoxin reductase:NAD-dependent glycerol-3-phosphate dehydrogenase	COG0240C	GO:0004367|GO:0005975|GO:0006072|GO:0008654|GO:0008654|GO:0009331|GO:0016491|GO:0016491|GO:0016614|GO:0046167|GO:0047952|GO:0047952|GO:0050662
BAbS19_I17720	YCII-related domain	COG2350S	GO:0000004|GO:0005554|GO:0008372
BAbS19_I17730	Family of unknown function DUF589	COG2947S	GO:0000004|GO:0005554|GO:0008372
BAbS19_I17740	SAM (and some other nucleotide) binding motif	COG3897R	GO:0000004|GO:0005554|GO:0008372
BAbS19_I17750	Protein of unknown function DUF6	COG0696G	GO:0000004|GO:0005554|GO:0008372
BAbS19_I17760	Bacterial regulatory protein, GntR family:Aminotransferase, class I and II	COG1166E	GO:0003677|GO:0003700|GO:0005622|GO:0006350|GO:0006355|GO:0006355|GO:0008483|GO:0016740
BAbS19_I17770	cell division protein FtsK, putative	COG1674D	GO:0000166|GO:0000166|GO:0000166|GO:0003677|GO:0003677|GO:0005524|GO:0005524|GO:0007049|GO:0007049|GO:0007059|GO:0007059|GO:0016020|GO:0016020|GO:0016021|GO:0016021|GO:0017111|GO:0051301|GO:0051301
BAbS19_I17780	Ammonium transporter	COG0004P	GO:0006810|GO:0008519|GO:0016020
BAbS19_I17790	Acyl-CoA thioesterase	COG1946I	GO:0006637|GO:0016291|GO:0016787
BAbS19_I17800	NAD binding site:UbiH/COQ6 monooxygenase:Flavoprotein monooxygenase:Pyridine nucleotide-disulphide oxidoreductase, class I:FA...	COG0653U	GO:0004497|GO:0006118|GO:0006744|GO:0008152|GO:0015997|GO:0016491|GO:0016491|GO:0050660
BAbS19_I17810	Glyoxalase/Bleomycin resistance protein/dioxygenase domain	COG0346E	GO:0016702
BAbS19_I17820	4Fe-4S ferredoxin, iron-sulfur binding domain:Succinate dehydrogenase/fumarate reductase iron-sulfur protein:2Fe-2S ferredoxin	COG0479C	GO:0000104|GO:0005506|GO:0005506|GO:0005506|GO:0005506|GO:0006099|GO:0006118|GO:0006118|GO:0006118|GO:0006118|GO:0009055|GO:0009055|GO:0009055|GO:0016020|GO:0016491|GO:0016491|GO:0016491
BAbS19_I17830	FAD-dependent pyridine nucleotide-disulphide oxidoreductase:Fumarate reductase/succinate dehydrogenase, FAD-binding site:Fuma...	COG1053C	GO:0000104|GO:0006099|GO:0006099|GO:0006118|GO:0006118|GO:0006118|GO:0006810|GO:0016491|GO:0016491|GO:0016491|GO:0016627|GO:0050660
BAbS19_I17840	succinate dehydrogenase, hydrophobic membrane anchor protein	COG2142C	GO:0000004|GO:0005554|GO:0008372
BAbS19_I17850	Succinate dehydrogenase, cytochrome b subunit	COG2009C	GO:0000104|GO:0000104|GO:0006099|GO:0006118|GO:0016020|GO:0016491
BAbS19_I17860	GCN5-related N-acetyltransferase	COG0452H	GO:0008080|GO:0008152|GO:0008415|GO:0016740
BAbS19_I17870	Aconitate hydratase, N-terminal:3-isopropylmalate dehydratase large subunit	COG0065E	GO:0003861|GO:0003861|GO:0003861|GO:0005506|GO:0008152|GO:0009098|GO:0009098|GO:0009316|GO:0016829|GO:0016829
BAbS19_I17880	Ribosomal protein L19	COG0335J	GO:0003735|GO:0005622|GO:0005840|GO:0006412|GO:0006412|GO:0030529
BAbS19_I17890	PUTATIVE ALLANTOIN PERMEASE	COG1952U	GO:0000004|GO:0005554|GO:0008372
BAbS19_I17900	Hypothetical Membrane Spanning Protein	COG0730R	GO:0000004|GO:0005554|GO:0008372
BAbS19_I17910	hypothetical protein	-	GO:0000004|GO:0005554|GO:0008372
BAbS19_I17920	Antibiotic biosynthesis monooxygenase	COG2329R	GO:0004497
BAbS19_I17930	hypothetical protein	-	GO:0000004|GO:0005554|GO:0008372
BAbS19_I17940	Bacterial regulatory protein LysR, HTH motif:Bacterial regulatory protein, ArsR family	COG0640K	GO:0003677|GO:0003700|GO:0005622|GO:0006350|GO:0006355|GO:0006355
BAbS19_I17950	tRNA (guanine-N1-)-methyltransferase	COG0336J	GO:0003723|GO:0006400|GO:0008033|GO:0008033|GO:0008168|GO:0008175|GO:0009019|GO:0009019|GO:0016740
BAbS19_I17960	ATP/GTP-binding site motif A (P-loop):RimM protein	COG0806J	GO:0005840|GO:0006364|GO:0006364|GO:0006364|GO:0042254|GO:0043022
BAbS19_I17970	Phage integrase:Phage integrase, N-terminal SAM-like	COG0582L	GO:0003677|GO:0003677|GO:0003677|GO:0006310|GO:0006310|GO:0007049|GO:0007059|GO:0015074|GO:0015074|GO:0051301
BAbS19_I17980	hypothetical protein	COG3735S	GO:0000004|GO:0005554|GO:0008372
BAbS19_I17990	Pyridine nucleotide-disulphide oxidoreductase, class-II:NAD binding site:Adrenodoxin reductase:Mercuric reductase:Pyridine nu...	COG1249C	GO:0004148|GO:0004148|GO:0005737|GO:0006118|GO:0006118|GO:0006118|GO:0015036|GO:0016491|GO:0016491|GO:0016491|GO:0016491|GO:0045454|GO:0050660|GO:0050660
BAbS19_I18000	hypothetical protein	-	GO:0000004|GO:0005554|GO:0008372
BAbS19_I18010	Lysine exporter protein (LYSE/YGGA)	COG1280E	GO:0000004|GO:0005554|GO:0008372
BAbS19_I18020	hypothetical protein	COG3686S	GO:0000004|GO:0005554|GO:0008372
BAbS19_I18030	Biotin/lipoyl attachment:Antifreeze protein, type I:Catalytic domain of components of various dehydrogenase complexes:Ribosom...	COG0508C	GO:0004149|GO:0004149|GO:0006099|GO:0008152|GO:0008415|GO:0008415|GO:0016740|GO:0031405|GO:0045252
BAbS19_I18040	Dehydrogenase, E1 component:Transketolase, central region	COG0567C	GO:0004591|GO:0004591|GO:0006096|GO:0016491|GO:0030976
BAbS19_I18050	hypothetical protein	-	GO:0000004|GO:0005554|GO:0008372
BAbS19_I18060	CoA Binding Domain:Succinyl-CoA ligase, alpha subunit:ATP-citrate lyase/succinyl-CoA ligase	COG0074C	GO:0000166|GO:0003824|GO:0005524|GO:0006099|GO:0008152|GO:0016829|GO:0016874
BAbS19_I18070	succinyl-CoA synthetase subunit beta	COG0045C	GO:0003824|GO:0003824|GO:0003824|GO:0005524|GO:0005524|GO:0008152
BAbS19_I18080	Lactate/malate dehydrogenase:L-lactate dehydrogenase:TrkA potassium uptake protein	COG0039C	GO:0004459|GO:0006096|GO:0006099|GO:0006099|GO:0006100|GO:0006108|GO:0016491|GO:0016491|GO:0030060|GO:0030060|GO:0030060
BAbS19_I18090	ATP/GTP-binding site motif A (P-loop):AFG1-like ATPase	COG1485R	GO:0000004|GO:0005554|GO:0008372
BAbS19_I18100	lipoprotein Omp19	-	GO:0016020|GO:0019867
BAbS19_I18110	hypothetical protein	-	GO:0000004|GO:0005554|GO:0008372
BAbS19_I18120	Diaminopimelate epimerase	COG0253E	GO:0008837|GO:0008837|GO:0009089|GO:0016853
BAbS19_I18130	elongator protein 3	COG0621J	GO:0003824|GO:0005506|GO:0005506|GO:0008152|GO:0046872|GO:0051536|GO:0051539
BAbS19_I18140	GTP-binding signal recognition particle (SRP54) G-domain:ATP/GTP-binding site motif A (P-loop):AAA ATPase:Cell division trans...	COG0552U	GO:0000166|GO:0000166|GO:0003723|GO:0003723|GO:0005524|GO:0005525|GO:0005525|GO:0005525|GO:0005786|GO:0006614|GO:0006614|GO:0016020|GO:0016020|GO:0017111|GO:0051301
BAbS19_I18150	ATP/GTP-binding site motif A (P-loop):Intracellular septation protein A	COG2917D	GO:0016021
BAbS19_I18160	Beta-lactamase-like	COG0491R	GO:0004416|GO:0016787
BAbS19_I18170	hypothetical protein	-	GO:0000004|GO:0005554|GO:0008372
BAbS19_I18180	hypothetical protein	-	GO:0000004|GO:0005554|GO:0008372
BAbS19_I18190	NUDIX hydrolase	COG0492O	GO:0004452|GO:0008299|GO:0016787|GO:0016787
BAbS19_I18200	GCN5-related N-acetyltransferase	COG0452H	GO:0008080|GO:0008152|GO:0016740
BAbS19_I18210	Arginine biosynthesis protein ArgJ	COG1364E	GO:0004042|GO:0004358|GO:0006526|GO:0008415|GO:0016740
BAbS19_I18220	hypothetical protein	-	GO:0000004|GO:0005554|GO:0008372
BAbS19_I18230	PpiC-type peptidyl-prolyl cis-trans isomerase	COG0760O	GO:0003755|GO:0006457|GO:0016853|GO:0016853
BAbS19_I18240	SecA protein:ATP/GTP-binding site motif A (P-loop):SEC-C motif	COG0653U	GO:0003676|GO:0004386|GO:0005524|GO:0005524|GO:0006605|GO:0006886
BAbS19_I18250	hypothetical protein	-	GO:0000004|GO:0005554|GO:0008372
BAbS19_I18260	hypothetical protein	-	GO:0000004|GO:0005554|GO:0008372
BAbS19_I18270	INTEGRAL MEMBRANE PROTEIN	COG2194R	GO:0008152
BAbS19_I18280	INTEGRAL MEMBRANE PROTEIN	COG2194R	GO:0008152
BAbS19_I18290	hypothetical protein	-	GO:0000004|GO:0005554|GO:0008372
BAbS19_I18300	Bacterial regulatory protein LysR, HTH motif:LysR substrate binding domain	COG0583K	GO:0003677|GO:0003700|GO:0006350|GO:0006355|GO:0006355
BAbS19_I18310	hypothetical protein	-	GO:0000004|GO:0005554|GO:0008372
BAbS19_I18320	Solute-binding protein/glutamate receptor:Bacterial extracellular solute-binding protein, family 3	COG0833E	GO:0004872|GO:0005215|GO:0006810|GO:0030288
BAbS19_I18330	ASPARAGINE TRANSPORT SYSTEM PERMEASE PROTEIN	COG0765E	GO:0005215|GO:0005215|GO:0006810|GO:0006810|GO:0006810|GO:0009276|GO:0016020|GO:0016021|GO:0016021
BAbS19_I18340	Binding-protein-dependent transport systems inner membrane component	COG0765E	GO:0005215|GO:0005215|GO:0006810|GO:0006810|GO:0006810|GO:0009276|GO:0016020|GO:0016021|GO:0016021
BAbS19_I18350	ATP/GTP-binding site motif A (P-loop):ABC transporter:AAA ATPase	COG1126E	GO:0000166|GO:0000166|GO:0005524|GO:0005524|GO:0016020|GO:0016020|GO:0016887|GO:0017111
BAbS19_I18360	Arginase/agmatinase/formiminoglutamase	COG0010E	GO:0008783|GO:0016787|GO:0016813|GO:0046872
BAbS19_I18370	Fumarate lyase:Delta crystallin	COG1027E	GO:0003824|GO:0008797|GO:0016829
BAbS19_I18380	ATP/GTP-binding site motif A (P-loop):ABC transporter:AAA ATPase	COG1126E	GO:0000166|GO:0000166|GO:0005524|GO:0005524|GO:0016020|GO:0016020|GO:0016887|GO:0017111
BAbS19_I18390	Asparaginase/glutaminase	COG0251J	GO:0004067|GO:0006520|GO:0016787
BAbS19_I18400	Bacterial regulatory proteins, AsnC family:Bacterial regulatory protein, GntR family	COG1802K	GO:0003700|GO:0003700|GO:0005622|GO:0005622|GO:0006355|GO:0006355|GO:0043565
BAbS19_I18410	Asparaginase/glutaminase	COG0251J	GO:0004067|GO:0006520|GO:0016787
BAbS19_I18420	GLUCARATE TRANSPORTER	COG0476H	GO:0005215|GO:0006810|GO:0006810|GO:0016020|GO:0016020|GO:0016021|GO:0016021
BAbS19_I18430	hypothetical protein	-	GO:0000004|GO:0005554|GO:0008372
BAbS19_I18440	Cys/Met metabolism pyridoxal-phosphate-dependent enzyme	COG0626E	GO:0003962|GO:0006520|GO:0016740
BAbS19_I18450	Universal stress protein (Usp):Usp domain	COG0589T	GO:0000004|GO:0005554|GO:0008372
BAbS19_I18460	ATP/GTP-binding site motif A (P-loop):Pyridoxal-5'-phosphate-dependent enzyme, beta family:Glucose/ribitol dehydrogenase:Cyst...	COG0031E	GO:0004124|GO:0004124|GO:0004124|GO:0006535|GO:0006535|GO:0016740
BAbS19_I18470	CYSTEINE SYNTHASE A	COG0031E	GO:0004124|GO:0004124|GO:0006535|GO:0006535
BAbS19_I18480	3-hydroxyacyl-CoA dehydrogenase, C-terminal:3-hydroxyacyl-CoA dehydrogenase, NAD binding domain:3-hydroxyacyl-CoA dehydrogenase	COG1250I	GO:0006631|GO:0008691|GO:0016491|GO:0016491|GO:0016491|GO:0050662
BAbS19_I18490	Antifreeze protein, type I:Electron transfer flavoprotein, alpha subunit	COG2025C	GO:0006118|GO:0009055|GO:0050660
BAbS19_I18500	Electron transfer flavoprotein beta-subunit	COG2086C	GO:0006118|GO:0006118|GO:0009055|GO:0009055
BAbS19_I18510	ExsB protein	COG0603R	GO:0008616|GO:0008616|GO:0016787
BAbS19_I18520	6-pyruvoyl tetrahydropterin synthase and hypothetical protein	COG0720H	GO:0000004|GO:0005554|GO:0008372
BAbS19_I18530	Proline-rich extensin:Radical SAM	COG0602O	GO:0005506|GO:0005506|GO:0046872|GO:0051536|GO:0051539
BAbS19_I18540	Protein of unknown function DUF80	COG2096S	GO:0000004|GO:0005554|GO:0008372
BAbS19_I18550	hypothetical protein	-	GO:0000004|GO:0005554|GO:0008372
BAbS19_I18560	Short-chain dehydrogenase/reductase SDR:Glucose/ribitol dehydrogenase	COG1027E	GO:0008152|GO:0016491|GO:0016491
BAbS19_I18570	Ribonuclease BN	COG1295S	GO:0004540|GO:0016787
BAbS19_I18580	Protein of unknown function DUF188	COG1671S	GO:0000004|GO:0005554|GO:0008372
BAbS19_I18590	Sodium:dicarboxylate symporter:Thioredoxin type domain:Thioredoxin domain 2	COG0525J	GO:0006118|GO:0009055|GO:0009055|GO:0015035|GO:0045454
BAbS19_I18600	Fumarate lyase:Delta crystallin	COG0165E	GO:0003824|GO:0004056|GO:0004056|GO:0004056|GO:0006526|GO:0006526|GO:0008652|GO:0016829|GO:0042450
BAbS19_I18610	hypothetical protein	COG5567N	GO:0000004|GO:0005554|GO:0008372
BAbS19_I18620	Orn/DAP/Arg decarboxylase, family 2:ATP/GTP-binding site motif A (P-loop):Diaminopimelate decarboxylase	COG0019E	GO:0003824|GO:0008836|GO:0008836|GO:0009085|GO:0009089|GO:0016829|GO:0016831
BAbS19_I18630	hypothetical protein	-	GO:0000004|GO:0005554|GO:0008372
BAbS19_I18640	Phosphoribosyltransferase:Hypoxanthine phosphoribosyl transferase	COG0634F	GO:0000287|GO:0004422|GO:0004422|GO:0005737|GO:0006166|GO:0006166|GO:0016740|GO:0016757|GO:0046872
BAbS19_I18650	Generic methyltransferase	COG0499H	GO:0008168|GO:0016740
BAbS19_I18660	histidinol-phosphate aminotransferase	COG0079E	GO:0000105|GO:0000105|GO:0000105|GO:0004400|GO:0004400|GO:0004400|GO:0008483|GO:0008652|GO:0009058|GO:0016740|GO:0016847
BAbS19_I18670	Prephenate dehydrogenase:TrkA potassium uptake protein	COG0287E	GO:0004665|GO:0006571|GO:0016491|GO:0047794
BAbS19_I18680	hypothetical protein	COG4093S	GO:0000004|GO:0005554|GO:0008372
BAbS19_I18690	ChaC-like protein	COG3703P	GO:0000004|GO:0005554|GO:0008372
BAbS19_I18700	Family of unknown function YGGT	COG0762S	GO:0000004|GO:0005554|GO:0008372
BAbS19_I18710	Inorganic pyrophosphatase:Bacterial/Archaeal inorganic pyrophosphatase	COG0221C	GO:0000287|GO:0004427|GO:0004427|GO:0005737|GO:0006796|GO:0016787
BAbS19_I18720	Mercuric reductase:Phospholipid/glycerol acyltransferase	COG0204I	GO:0003841|GO:0008152|GO:0008415|GO:0008415|GO:0016740
BAbS19_I18730	hypothetical protein	COG1434S	GO:0000004|GO:0005554|GO:0008372
BAbS19_I18740	hypothetical protein	COG2177D	GO:0000004|GO:0005554|GO:0008372
BAbS19_I18750	ATP/GTP-binding site motif A (P-loop):ABC transporter:AAA ATPase	COG2884D	GO:0000166|GO:0000166|GO:0005524|GO:0005524|GO:0005524|GO:0016020|GO:0016020|GO:0016887|GO:0017111|GO:0051301
BAbS19_I18760	hypothetical protein	-	GO:0000004|GO:0005554|GO:0008372
BAbS19_I18770	MIP family:Aromatic amino acid permease	COG0580G	GO:0005215|GO:0005215|GO:0006810|GO:0006810|GO:0006810|GO:0015250|GO:0016020|GO:0016020|GO:0016020|GO:0016021|GO:0016021
BAbS19_I18780	hypothetical protein	COG2834M	GO:0000004|GO:0005554|GO:0008372
BAbS19_I18790	EXODEOXYRIBONUCLEASE III	COG0708L	GO:0004518|GO:0004519|GO:0006281|GO:0006281|GO:0008853|GO:0016787
BAbS19_I18800	Cyclic nucleotide-binding domain:cAMP-dependent protein kinase:Delta crystallin	COG0664T	GO:0016301
BAbS19_I18810	Response regulator receiver:Transcriptional regulatory protein, C terminal	COG0744M	GO:0000156|GO:0000156|GO:0000160|GO:0000160|GO:0000160|GO:0003677|GO:0003677|GO:0006350|GO:0006355|GO:0006355|GO:0006355
BAbS19_I18820	Hypothetical Cytosolic Protein	COG3786S	GO:0000004|GO:0005554|GO:0008372
BAbS19_I18830	intimin/invasin family protein	-	GO:0000004|GO:0005554|GO:0008372
BAbS19_I18840	Glyceraldehyde 3-phosphate dehydrogenase	-	GO:0000004|GO:0005554|GO:0008372
BAbS19_I18850	hypothetical protein	-	GO:0000004|GO:0005554|GO:0008372
BAbS19_I18860	outer membrane autotransporter	COG3467R	GO:0000004|GO:0005554|GO:0008372
BAbS19_I18870	outer membrane autotransporter	COG3467R	GO:0000004|GO:0005554|GO:0008372
BAbS19_I18880	Protein of unknown function DUF165	COG1738S	GO:0000004|GO:0005554|GO:0008372
BAbS19_I18890	Ribosomal protein L28:ATP/GTP-binding site motif A (P-loop)	COG0227J	GO:0003735|GO:0005622|GO:0005840|GO:0006412
BAbS19_I18900	hypothetical protein	-	GO:0000004|GO:0005554|GO:0008372
BAbS19_I18910	Bacterial regulatory protein, MerR family	COG0789K	GO:0003700|GO:0005622|GO:0006355
BAbS19_I18920	DNA gyrase, subunit B:H+ transporting ATPase, proton pump:Cadmium-transporting ATPase:ATP/GTP-binding site motif A (P-loop):A...	COG2217P	GO:0000166|GO:0000287|GO:0005261|GO:0005524|GO:0005524|GO:0005524|GO:0005524|GO:0006810|GO:0006812|GO:0008270|GO:0015662|GO:0015662|GO:0016020|GO:0016020|GO:0016020|GO:0016020|GO:0016020|GO:0016021|GO:0016021|GO:0016787|GO:0016818|GO:0030001|GO:0030001|GO:0030001|GO:0046872|GO:0046872|GO:0046872|GO:0046873
BAbS19_I18930	hypothetical protein	-	GO:0000004|GO:0005554|GO:0008372
BAbS19_I18940	hypothetical protein	-	GO:0000004|GO:0005554|GO:0008372
BAbS19_I18950	Von Willebrand factor, type A:Cobalt chelatase, pCobT subunit	COG4547H	GO:0000004|GO:0005554|GO:0008372
BAbS19_I18960	Chaperonin clpA/B:ATP/GTP-binding site motif A (P-loop):Cobalt chelatase, pCobS small subunit	COG0714R	GO:0000004|GO:0005554|GO:0008372
BAbS19_I18970	Heat shock protein DnaJ, N-terminal:Heat shock protein DnaJ	COG2214O	GO:0006457|GO:0006457|GO:0006986|GO:0031072
BAbS19_I18980	Basic helix-loop-helix dimerization domain bHLH:BolA-like protein	COG0271T	GO:0000004|GO:0005554|GO:0008372
BAbS19_I18990	CBS domain:CBS:Transporter associated domain	COG4536P	GO:0000004|GO:0005554|GO:0008372
BAbS19_I19000	Pyruvate kinase:3-dehydroquinate synthase domain:3-dehydroquinate synthase	COG0337E	GO:0000156|GO:0000160|GO:0003677|GO:0003856|GO:0003856|GO:0003856|GO:0006355|GO:0008652|GO:0009073|GO:0009073|GO:0016089|GO:0016829
BAbS19_I19010	Shikimate kinase:ATP/GTP-binding site motif A (P-loop)	COG0703E	GO:0000166|GO:0000287|GO:0000287|GO:0004765|GO:0004765|GO:0004765|GO:0005524|GO:0005524|GO:0005524|GO:0008652|GO:0009073|GO:0016089|GO:0016301|GO:0016740|GO:0046872
BAbS19_I19020	hypothetical protein	-	GO:0000004|GO:0005554|GO:0008372
BAbS19_I19030	Phage integrase:Phage integrase, N-terminal SAM-like	COG4974L	GO:0003677|GO:0003677|GO:0003677|GO:0003677|GO:0006310|GO:0006310|GO:0006310|GO:0006310|GO:0006313|GO:0006313|GO:0007049|GO:0007049|GO:0007059|GO:0007059|GO:0007059|GO:0009037|GO:0015074|GO:0015074|GO:0051301|GO:0051301
BAbS19_I19040	Acetyl-CoA carboxylase, alpha subunit	COG0825I	GO:0003989|GO:0003989|GO:0006633|GO:0009317|GO:0016874|GO:0016874
BAbS19_I19050	Pollen allergen Poa pIX/Phl pVI, C-terminal	COG3034S	GO:0000004|GO:0005554|GO:0008372
BAbS19_I19060	hypothetical protein	COG0425O	GO:0000004|GO:0005554|GO:0008372
BAbS19_I19070	ATP/GTP-binding site motif A (P-loop):Cobalamin synthesis protein/P47K	COG0523R	GO:0000004|GO:0005554|GO:0008372
BAbS19_I19080	D-alanyl-D-alanine carboxypeptidase 1, S11 family	COG1686M	GO:0004180|GO:0006508|GO:0009002|GO:0009002|GO:0016787
BAbS19_I19090	Antifreeze protein, type I:Peptidase M20/M25/M40	COG1473R	GO:0000004|GO:0005554|GO:0008372
BAbS19_I19100	Short-chain dehydrogenase/reductase SDR:Glucose/ribitol dehydrogenase	COG1027E	GO:0004316|GO:0008152|GO:0008152|GO:0016491|GO:0016491|GO:0016491
BAbS19_I19110	Protein of unknown function DUF636	COG3791S	GO:0000004|GO:0005554|GO:0008372
BAbS19_I19120	ATP/GTP-binding site motif A (P-loop)	-	GO:0000004|GO:0005554|GO:0008372
BAbS19_I19130	Glucose-methanol-choline oxidoreductase:GMC oxidoreductase	COG2303E	GO:0006066|GO:0006118|GO:0016491|GO:0016614|GO:0050660
BAbS19_I19140	Short-chain dehydrogenase/reductase SDR:Glucose/ribitol dehydrogenase	COG1027E	GO:0004316|GO:0008152|GO:0008152|GO:0016491|GO:0016491|GO:0016491
BAbS19_I19150	NAD binding site:MIP family:Pyridine nucleotide-disulphide oxidoreductase, class I:TrkA potassium uptake protein	COG2303E	GO:0000004|GO:0005554|GO:0008372
BAbS19_I19160	Aldehyde dehydrogenase	COG1012C	GO:0016491|GO:0016491
BAbS19_I19170	Enoyl-CoA hydratase/isomerase	-	GO:0004300|GO:0016829|GO:0016853
BAbS19_I19180	ACETYL-COA:ACETOACETYL-COA TRANSFERASE ALPHA SUBUNIT	COG4670I	GO:0008152|GO:0008410
BAbS19_I19190	Oxidoreductase, N-terminal:Oxidoreductase, C-terminal	COG0673R	GO:0016491|GO:0047061
BAbS19_I19200	Bacterial regulatory protein LacI, HTH motif:Periplasmic binding protein/LacI transcriptional regulator	COG1609K	GO:0003677|GO:0003700|GO:0005622|GO:0006350|GO:0006355|GO:0006355
BAbS19_I19210	hypothetical protein	-	GO:0000004|GO:0005554|GO:0008372
BAbS19_I19220	Bacterial luciferase	COG2141C	GO:0016491|GO:0047646
BAbS19_I19230	Protein of unknown function DUF534	COG2984R	GO:0000004|GO:0005554|GO:0008372
BAbS19_I19240	Bacterial inner-membrane translocator	COG4120R	GO:0000004|GO:0005554|GO:0008372
BAbS19_I19250	ATP/GTP-binding site motif A (P-loop):ABC transporter:AAA ATPase	COG1101R	GO:0000166|GO:0000166|GO:0005524|GO:0005524|GO:0016020|GO:0016020|GO:0016887|GO:0017111
BAbS19_I19260	putative DNA polymerase III, delta subunit	COG1466L	GO:0003887|GO:0003891|GO:0005694|GO:0006260|GO:0016740|GO:0016779
BAbS19_I19270	ParB-like nuclease:ParB-like partition protein	COG1475K	GO:0003677|GO:0003677|GO:0030542
BAbS19_I19280	NifH/frxC family:ATPase, ParA type	COG1192D	GO:0000004|GO:0005554|GO:0008372
BAbS19_I19290	Glucose inhibited division protein	COG0357M	GO:0007049|GO:0016740
BAbS19_I19300	NAD binding site:FAD-dependent pyridine nucleotide-disulphide oxidoreductase:Glucose-inhibited division protein, A family:Glu...	COG0445D	GO:0008033|GO:0008033|GO:0050660
BAbS19_I19310	ATP/GTP-binding site motif A (P-loop):Ras GTPase superfamily:tRNA modification GTPase TrmE:Small GTP-binding protein domain:G...	COG0486R	GO:0003924|GO:0005525|GO:0005525|GO:0005525|GO:0005525|GO:0005622|GO:0006400|GO:0007264
BAbS19_I19320	Protein of unknown function DUF255	COG1331O	GO:0000004|GO:0005554|GO:0008372
BAbS19_I19330	H+-transporting two-sector ATPase, alpha/beta subunit, central region:ATP/GTP-binding site motif A (P-loop):Cold-shock DNA-bi...	COG1158K	GO:0000166|GO:0003676|GO:0003715|GO:0005524|GO:0006353|GO:0017111
BAbS19_I19340	Conserved hypothetical protein 701	COG1981S	GO:0000004|GO:0005554|GO:0008372
BAbS19_I19350	Uroporphyrinogen decarboxylase (URO-D):Uroporphyrinogen decarboxylase HemE	COG0407H	GO:0004853|GO:0004853|GO:0004853|GO:0006779|GO:0006779|GO:0006779|GO:0016829|GO:0016831
BAbS19_I19360	Protein of unknown function DUF299	COG1806S	GO:0003677
BAbS19_I19370	Maf-like protein	COG0424D	GO:0000004|GO:0005554|GO:0008372
BAbS19_I19380	shikimate 5-dehydrogenase	COG0169E	GO:0004764|GO:0016089|GO:0016491|GO:0050661
BAbS19_I19390	ATP/GTP-binding site motif A (P-loop):Dephospho-CoA kinase	COG0237H	GO:0000166|GO:0004140|GO:0004140|GO:0005524|GO:0005524|GO:0005524|GO:0015937|GO:0015937|GO:0016301|GO:0016740
BAbS19_I19400	Beta tubulin:DNA polymerase III, epsilon subunit:Exonuclease:DNA polymerase 3, epsilon subunit	COG0847L	GO:0000287|GO:0003677|GO:0003677|GO:0003887|GO:0003887|GO:0003887|GO:0003887|GO:0004518|GO:0004527|GO:0004527|GO:0005622|GO:0006260|GO:0006260|GO:0006260|GO:0016740|GO:0016779|GO:0016787|GO:0030145|GO:0046872
BAbS19_I19410	Bacterial protein export chaperone SecB	COG1952U	GO:0006457|GO:0006457|GO:0006605|GO:0006810|GO:0015031|GO:0015031|GO:0015031|GO:0051082|GO:0051262
BAbS19_I19420	FxsA cytoplasmic membrane protein	COG3030R	GO:0016020
BAbS19_I19430	Calcium-binding EF-hand	COG4395S	GO:0000004|GO:0005554|GO:0008372
BAbS19_I19440	MltA family	COG2821M	GO:0008152|GO:0016787|GO:0016798
BAbS19_I19450	Smr protein/MutS2 C-terminal	COG2840S	GO:0000004|GO:0005554|GO:0008372
BAbS19_I19460	Helix-turn-helix motif	COG1396K	GO:0043565
BAbS19_I19470	hypothetical protein	-	GO:0000004|GO:0005554|GO:0008372
BAbS19_I19480	CbxX/CfqX superfamily:ATP/GTP-binding site motif A (P-loop):AAA ATPase:Heat shock protein HslVU	COG1220O	GO:0000166|GO:0000166|GO:0005515|GO:0005524|GO:0005524|GO:0005737|GO:0006457|GO:0006457|GO:0006986|GO:0009376|GO:0009377|GO:0016887|GO:0017111
BAbS19_I19490	Pyridine nucleotide-disulphide oxidoreductase, class-II:Multispecific proteasome protease	COG5405O	GO:0005829|GO:0008233|GO:0016787|GO:0043234
BAbS19_I19500	Imidazoleglycerol-phosphate dehydratase	COG0131E	GO:0000105|GO:0000105|GO:0004424|GO:0004424|GO:0016829
BAbS19_I19510	hypothetical protein	-	GO:0000004|GO:0005554|GO:0008372
BAbS19_I19520	Glutamine amidotransferase class-I	COG0118E	GO:0000105|GO:0000105|GO:0000105|GO:0000107|GO:0003824|GO:0005737|GO:0006541|GO:0006541|GO:0008652|GO:0016740|GO:0016763
BAbS19_I19530	FMN/related compound-binding core:Histidine biosynthesis protein:Phosphoribosylformimino-5-aminoimidazole carboxamide ribotid...	COG0106E	GO:0000105|GO:0000105|GO:0000105|GO:0003824|GO:0003949|GO:0003949|GO:0003949|GO:0008152|GO:0008652|GO:0016853
BAbS19_I19540	FMN/related compound-binding core:Histidine biosynthesis protein HisF:Histidine biosynthesis protein	COG0107E	GO:0000105|GO:0000105|GO:0000105|GO:0000107|GO:0000107|GO:0003824|GO:0005737|GO:0008152|GO:0008652|GO:0009382|GO:0016829
BAbS19_I19550	Phosphoribosyl pyrophosphohydrolase/cyclohydrolase:Phosphoribosyl-ATP pyrophosphohydrolase	COG0140E	GO:0000105|GO:0000105|GO:0000105|GO:0004636|GO:0004636|GO:0004636|GO:0008652|GO:0016787
BAbS19_I19560	Uridine kinase:ATP/GTP-binding site motif A (P-loop):Bacterial pantothenate kinase:Phosphoribulokinase/uridine kinase	COG1072H	GO:0000166|GO:0004594|GO:0005524|GO:0005524|GO:0005737|GO:0015937|GO:0015937|GO:0016301|GO:0016740
BAbS19_I19570	Class I peptide chain release factor domain	COG1186J	GO:0003747|GO:0006415
BAbS19_I19580	phosphoenolpyruvate carboxykinase	COG1866C	GO:0000166|GO:0004611|GO:0004612|GO:0004612|GO:0004612|GO:0005524|GO:0005524|GO:0005524|GO:0005525|GO:0006094|GO:0006094|GO:0006094|GO:0006094|GO:0016829|GO:0016831
BAbS19_I19590	Response regulator receiver:Transcriptional regulatory protein, C terminal	COG0744M	GO:0000156|GO:0000156|GO:0000160|GO:0000160|GO:0000160|GO:0003677|GO:0003677|GO:0006350|GO:0006355|GO:0006355|GO:0006355
BAbS19_I19600	ATP-binding region, ATPase-like:Histidine kinase, HAMP region:Histidine kinase A, N-terminal:Bacterial sensor protein, C-term...	-	GO:0000155|GO:0004673|GO:0004871|GO:0005524|GO:0005524|GO:0007165|GO:0007165|GO:0016020|GO:0016020|GO:0016301|GO:0016310|GO:0016740|GO:0016772|GO:0018106
BAbS19_I19610	ATP/GTP-binding site motif A (P-loop)	COG1493T	GO:0000004|GO:0005554|GO:0008372
BAbS19_I19620	PTS system fructose subfamily IIA component	COG2893G	GO:0008982|GO:0009401|GO:0016021|GO:0016740
BAbS19_I19630	PtsH, phosphocarrier protein HPr	COG1925G	GO:0005351|GO:0005351|GO:0009401|GO:0009401
BAbS19_I19640	S-adenosyl-L-homocysteine hydrolase:ATP/GTP-binding site motif A (P-loop)	COG0499H	GO:0004013|GO:0004013|GO:0006730|GO:0006730|GO:0016787
BAbS19_I19650	ATP-binding region, ATPase-like:Histidine kinase A, N-terminal:Bacterial sensor protein, C-terminal:Histidine kinase	COG2202T	GO:0000155|GO:0004673|GO:0004871|GO:0005524|GO:0005524|GO:0007165|GO:0007165|GO:0016020|GO:0016301|GO:0016310|GO:0016772|GO:0018106
BAbS19_I19660	ATP/GTP-binding protein	COG3178R	GO:0000166|GO:0005524
BAbS19_I19670	Nucleotidyl transferase	COG1207M	GO:0004475|GO:0016740|GO:0016779
BAbS19_I19680	hypothetical protein	COG3893L	GO:0000004|GO:0005554|GO:0008372
BAbS19_I19690	UvrD/REP helicase:ATP/GTP-binding site motif A (P-loop)	COG1074L	GO:0003677|GO:0004003|GO:0004386|GO:0005524|GO:0006281
BAbS19_I19700	Thioredoxin:Thioredoxin type domain:Thioredoxin domain 2	COG0525J	GO:0006662|GO:0009055|GO:0009055|GO:0015035|GO:0015035|GO:0045454|GO:0045454
BAbS19_I19710	Folylpolyglutamate synthetase	COG0285H	GO:0004326|GO:0005524|GO:0008841|GO:0009396|GO:0016874
BAbS19_I19720	Acetyl-CoA carboxylase carboxyl transferase, beta subunit:WW/Rsp5/WWP domain	COG0777I	GO:0003989|GO:0003989|GO:0006633|GO:0009317|GO:0016740|GO:0016874|GO:0016874
BAbS19_I19730	Tryptophan synthase, alpha chain:FMN/related compound-binding core	COG0159E	GO:0003824|GO:0004834|GO:0004834|GO:0006568|GO:0008152|GO:0016829
BAbS19_I19740	hypothetical protein	-	GO:0000004|GO:0005554|GO:0008372
BAbS19_I19750	FAD-dependent pyridine nucleotide-disulphide oxidoreductase:Pyridoxal-5'-phosphate-dependent enzyme, beta family:Tryptophan s...	COG0133E	GO:0004834|GO:0004834|GO:0004834|GO:0006568|GO:0006568|GO:0016829
BAbS19_I19760	N-(5'phosphoribosyl)anthranilate isomerase (PRAI)	COG0135E	GO:0003824|GO:0004640|GO:0008152|GO:0016853
BAbS19_I19770	hypothetical protein	COG1434S	GO:0000004|GO:0005554|GO:0008372
BAbS19_I19780	Protein of unknown function DUF45	COG1451R	GO:0000004|GO:0005554|GO:0008372
BAbS19_I19790	Hypothetical Cytosolic Protein	-	GO:0000004|GO:0005554|GO:0008372
BAbS19_I19800	hypothetical protein	-	GO:0000004|GO:0005554|GO:0008372
BAbS19_I19810	benzoate transport protein, putative	COG3135Q	GO:0016021
BAbS19_I19820	Esterase/lipase/thioesterase, active site:Alpha/beta hydrolase	COG0596R	GO:0016787
BAbS19_I19830	Initiation factor 3	COG0290J	GO:0003743|GO:0003743|GO:0006413
BAbS19_I19840	nickel-cobalt-cadmium resistance protein	COG2020O	GO:0000004|GO:0005554|GO:0008372
BAbS19_I19850	Ribosomal protein L35	COG0291J	GO:0003735|GO:0005622|GO:0005840|GO:0006412|GO:0006412|GO:0030529
BAbS19_I19860	Ribosomal protein L20, bacterial and organelle form:Ribosomal protein L20	COG0292J	GO:0000027|GO:0003723|GO:0003723|GO:0003723|GO:0003735|GO:0003735|GO:0005622|GO:0005622|GO:0005840|GO:0005840|GO:0006412|GO:0006412|GO:0019843|GO:0019843|GO:0030529
BAbS19_I19870	hypothetical protein	-	GO:0000166|GO:0005524
BAbS19_I19880	Beta and gamma crystallin:Phenylalanyl-tRNA synthetase, class IIc:Aminoacyl tRNA synthetase, class II, N-terminal:Phenylalany...	COG0016J	GO:0000166|GO:0000287|GO:0000287|GO:0004812|GO:0004812|GO:0004826|GO:0004826|GO:0004826|GO:0004826|GO:0005524|GO:0005524|GO:0005524|GO:0005524|GO:0005524|GO:0005737|GO:0006412|GO:0006418|GO:0006432|GO:0006432|GO:0006432|GO:0016874|GO:0046872
BAbS19_I19890	ATP/GTP-binding site motif A (P-loop):t-RNA-binding region:Bacterial phenylalanyl-tRNA synthetase, beta subunit:Ferredoxin-fo...	COG0072J	GO:0000049|GO:0000049|GO:0000166|GO:0000287|GO:0000287|GO:0003723|GO:0004812|GO:0004826|GO:0004826|GO:0004826|GO:0005524|GO:0005524|GO:0005524|GO:0005737|GO:0006412|GO:0006432|GO:0006432|GO:0016874|GO:0046872
BAbS19_I19900	Oxidoreductase, N-terminal:Oxidoreductase, C-terminal	COG0673R	GO:0000004|GO:0005554|GO:0008372
BAbS19_I19910	Heat shock protein Hsp70:Calcium-binding EF-hand	COG0443O	GO:0000166|GO:0005524|GO:0005524|GO:0005524|GO:0006457|GO:0006457|GO:0006457|GO:0006986|GO:0051082
BAbS19_I19920	Cytochrome c heme-binding site:DnaJ central domain (CXXCXGXG):Heat shock protein DnaJ, N-terminal:Chaperone DnaJ, C-terminal...	COG0484O	GO:0005524|GO:0006260|GO:0006457|GO:0006457|GO:0006457|GO:0006457|GO:0006457|GO:0006986|GO:0008270|GO:0009408|GO:0031072|GO:0031072|GO:0031072|GO:0046872|GO:0051082|GO:0051082|GO:0051082
BAbS19_I19930	SAM (and some other nucleotide) binding motif	COG3963I	GO:0004608|GO:0008168|GO:0016740
BAbS19_I19940	Orotidine 5'-phosphate decarboxylase	COG0284F	GO:0003824|GO:0004590|GO:0004590|GO:0004590|GO:0006207|GO:0006221|GO:0006221|GO:0008152|GO:0016829|GO:0016831
BAbS19_I19950	hypothetical protein	COG5470S	GO:0000004|GO:0005554|GO:0008372
BAbS19_I19960	Senescence marker protein-30 (SMP-30)	COG3386G	GO:0000004|GO:0005554|GO:0008372
BAbS19_I19970	Prokaryotic glutathione synthetase, N-terminal:Prokaryotic glutathione synthetase ATP-binding domain:Glutathione synthetase, ...	COG0188L	GO:0000166|GO:0003824|GO:0003824|GO:0003824|GO:0004363|GO:0004363|GO:0005524|GO:0005524|GO:0005524|GO:0005524|GO:0006750|GO:0006750|GO:0016874
BAbS19_I19980	Mg chelatase-related protein	COG0606O	GO:0000166|GO:0000166|GO:0003677|GO:0005524|GO:0005524|GO:0006270|GO:0008094|GO:0015979|GO:0015995|GO:0016874|GO:0017111|GO:0030494
BAbS19_I19990	Band 4.1 domain	COG3672S	GO:0000004|GO:0005554|GO:0008372
BAbS19_I20000	Rare lipoprotein A	COG0797M	GO:0000004|GO:0005554|GO:0008372
BAbS19_I20010	Hypothetical Membrane Spanning Protein	COG2832S	GO:0000004|GO:0005554|GO:0008372
BAbS19_I20020	phosphate ABC transporter, phosphate-binding protein	COG0226P	GO:0000004|GO:0005554|GO:0008372
BAbS19_I20030	Binding-protein-dependent transport systems inner membrane component:Cl-channel, voltage gated:Blood group Rhesus C/E and D ...	COG0573P	GO:0005215|GO:0005315|GO:0006810|GO:0006810|GO:0006817|GO:0016020|GO:0016021|GO:0016021
BAbS19_I20040	Binding-protein-dependent transport systems inner membrane component	COG0581P	GO:0005215|GO:0005315|GO:0006810|GO:0006810|GO:0006817|GO:0009276|GO:0015114|GO:0016020|GO:0016021
BAbS19_I20050	ATP/GTP-binding site motif A (P-loop):ABC transporter:AAA ATPase	COG1117P	GO:0000166|GO:0000166|GO:0005315|GO:0005524|GO:0005524|GO:0006810|GO:0006817|GO:0006817|GO:0015114|GO:0015415|GO:0016020|GO:0016020|GO:0016020|GO:0016787|GO:0016887|GO:0017111
BAbS19_I20060	PhoU	COG0704P	GO:0000004|GO:0005554|GO:0008372
BAbS19_I20070	Response regulator receiver:Transcriptional regulatory protein, C terminal	COG0744M	GO:0000156|GO:0000156|GO:0000156|GO:0000160|GO:0000160|GO:0000160|GO:0000160|GO:0003677|GO:0003677|GO:0003677|GO:0006350|GO:0006355|GO:0006355|GO:0006355|GO:0006810|GO:0006817|GO:0006817
BAbS19_I20080	lipoprotein, putative	COG3773M	GO:0000004|GO:0005554|GO:0008372
BAbS19_I20090	lipoprotein, putative	-	GO:0000004|GO:0005554|GO:0008372
BAbS19_I20100	Thermophilic metalloprotease (M29)	COG2309E	GO:0004177|GO:0004177|GO:0006508|GO:0008233|GO:0008237|GO:0016787
BAbS19_I20110	Ferritin:DNA-binding protein Dps	COG0783P	GO:0003677|GO:0006950|GO:0016491|GO:0046914
BAbS19_I20120	Glycoprotease (M22) metalloprotease	COG1214O	GO:0008233|GO:0008237|GO:0008450|GO:0016787
BAbS19_I20130	GCN5-related N-acetyltransferase:Ribosomal-protein-alanine acetyltransferase	COG0456R	GO:0006474|GO:0008080|GO:0008152|GO:0008415|GO:0008999|GO:0016407|GO:0016740
BAbS19_I20140	Phospholipid/glycerol acyltransferase	COG0204I	GO:0008152|GO:0008415|GO:0008415|GO:0016740
BAbS19_I20150	hypothetical protein	COG0621J	GO:0005506|GO:0005506|GO:0046872|GO:0051536|GO:0051539
BAbS19_I20160	ATP/GTP-binding site motif A (P-loop):PhoH-like protein	COG1702T	GO:0000004|GO:0005554|GO:0008372
BAbS19_I20170	DIACYGLYCEROL KINASE	COG0319R	GO:0000004|GO:0005554|GO:0008372
BAbS19_I20180	CBS domain containing protein	COG1253R	GO:0000004|GO:0005554|GO:0008372
BAbS19_I20190	Blood group Rhesus C/E and D polypeptide:Nitrilase/cyanide hydratase and apolipoprotein N-acyltransferase:Apolipoprotein N-ac...	COG0815M	GO:0006807|GO:0008415|GO:0016021|GO:0016410|GO:0016740|GO:0016810|GO:0042158
BAbS19_I20200	Helix-turn-helix motif	COG1396K	GO:0043565
BAbS19_I20210	S-adenosylmethionine synthetase	COG0192H	GO:0000166|GO:0000287|GO:0004478|GO:0004478|GO:0005524|GO:0005524|GO:0006730|GO:0006730|GO:0016740|GO:0030955|GO:0046872
BAbS19_I20220	Putative methyltransferase	COG0220R	GO:0006400|GO:0008033|GO:0008168|GO:0008176|GO:0008176|GO:0016740
BAbS19_I20230	Domain of unknown function DUF150	COG0779S	GO:0000004|GO:0005554|GO:0008372
BAbS19_I20240	Ribosomal protein S1:RNA binding S1:KH domain:KH domain, type 1	COG0195K	GO:0003676|GO:0003676|GO:0003723|GO:0003723|GO:0030528|GO:0030528
BAbS19_I20250	Protein of unknown function DUF448	COG2740K	GO:0000004|GO:0005554|GO:0008372
BAbS19_I20260	Initiation factor 2:Elongation factor, GTP-binding:ATP/GTP-binding site motif A (P-loop):Ras GTPase superfamily:Proline-rich ...	COG0532J	GO:0000166|GO:0003743|GO:0003743|GO:0003743|GO:0003924|GO:0003924|GO:0005525|GO:0005525|GO:0005525|GO:0005525|GO:0005622|GO:0006412|GO:0006413|GO:0006413
BAbS19_I20270	Ribosome-binding factor A	COG0858J	GO:0006364
BAbS19_I20280	Pseudouridylate synthase TruB, N-terminal:tRNA pseudouridine synthase B	COG0130J	GO:0004730|GO:0008033|GO:0008033|GO:0016439|GO:0016853|GO:0031119
BAbS19_I20290	Ribosomal protein S15:Ribosomal protein S15, bacterial chloroplast and mitochondrial type	COG0184J	GO:0003723|GO:0003735|GO:0003735|GO:0005622|GO:0005840|GO:0005840|GO:0006412|GO:0006412|GO:0006412|GO:0019843|GO:0030529
BAbS19_I20300	Ribosomal protein S1:3' exoribonuclease:RNA binding S1:KH domain:KH domain, type 1	COG1185J	GO:0000175|GO:0003676|GO:0003676|GO:0003723|GO:0003723|GO:0003723|GO:0004654|GO:0004654|GO:0006396|GO:0006402|GO:0016740|GO:0016779
BAbS19_I20310	SAM (and some other nucleotide) binding motif	COG2813J	GO:0008168|GO:0016740
BAbS19_I20320	N-6 Adenine-specific DNA methylase:N6 adenine-specific DNA methyltransferase, N12 class:Methyltransferase small	COG2813J	GO:0003676|GO:0008168|GO:0008168|GO:0016740|GO:0032259
BAbS19_I20330	possible enoyl-(acyl-carrier-protein) reductase	COG0623I	GO:0004318|GO:0008152|GO:0016491|GO:0016491
BAbS19_I20340	Beta-ketoacyl synthase	COG0303H	GO:0003824|GO:0004315|GO:0006633|GO:0008415|GO:0016740
BAbS19_I20350	3-hydroxydecanoyl-ACP dehydratase	COG0764I	GO:0003824|GO:0005737|GO:0006633|GO:0006633|GO:0006633|GO:0006633|GO:0008610|GO:0008693|GO:0008693|GO:0008693|GO:0016829
BAbS19_I20360	Ferric-uptake regulator	COG0735P	GO:0003700|GO:0006355
BAbS19_I20370	Glutelin:Lipoprotein YaeC family:NLPA lipoprotein	COG1464P	GO:0000004|GO:0005554|GO:0008372
BAbS19_I20380	Bacterial SH3-like region	COG3807S	GO:0000004|GO:0005554|GO:0008372
BAbS19_I20390	TrkA potassium uptake protein:D-isomer specific 2-hydroxyacid dehydrogenase, catalytic domain:D-isomer specific 2-hydroxyacid...	COG1051F	GO:0008873|GO:0016491|GO:0016616|GO:0048037
BAbS19_I20400	Esterase/lipase/thioesterase, active site:Lipase:Prolyl aminopeptidase S33:Alpha/beta hydrolase	COG0596R	GO:0004177|GO:0006725|GO:0016787|GO:0016787
BAbS19_I20410	NLP/P60	COG0791M	GO:0000004|GO:0005554|GO:0008372
BAbS19_I20420	Bacterial regulatory protein, MarR family	COG1846K	GO:0003677|GO:0003700|GO:0005622|GO:0006350|GO:0006355|GO:0006355
BAbS19_I20430	Cytosol aminopeptidase	COG0260E	GO:0004177|GO:0004177|GO:0004178|GO:0004178|GO:0005622|GO:0005737|GO:0006508|GO:0016787|GO:0019538|GO:0030145
BAbS19_I20440	Hypothetical Cytosolic Protein	-	GO:0000004|GO:0005554|GO:0008372
BAbS19_I20450	Formamidopyrimidine-DNA glycolase:Formamidopyrimidine-DNA glycolase, zinc binding domain:Sugar transporter superfamily	COG0266L	GO:0003677|GO:0003684|GO:0003824|GO:0003906|GO:0003906|GO:0006281|GO:0006281|GO:0006281|GO:0006281|GO:0006284|GO:0006974|GO:0008152|GO:0008270|GO:0008270|GO:0008270|GO:0008534|GO:0008534|GO:0008534|GO:0016787|GO:0016798|GO:0016829|GO:0046872
BAbS19_I20460	Enoyl-CoA hydratase/isomerase	COG1024I	GO:0003824|GO:0004300|GO:0008152|GO:0016829|GO:0016853
BAbS19_I20470	Ribosomal protein S20	COG0268J	GO:0003723|GO:0003723|GO:0003735|GO:0005622|GO:0005840|GO:0006412|GO:0006412|GO:0019843|GO:0019843|GO:0030529
BAbS19_II00010	Replication protein C	-	GO:0000004|GO:0005554|GO:0008372
BAbS19_II00020	hypothetical protein	-	GO:0000004|GO:0005554|GO:0008372
BAbS19_II00030	hypothetical protein	-	GO:0000004|GO:0005554|GO:0008372
BAbS19_II00040	Ribokinase:Carbohydrate kinase, PfkB	COG0524G	GO:0004747|GO:0004747|GO:0004747|GO:0006014|GO:0006014|GO:0016301|GO:0016740
BAbS19_II00050	ATP/GTP-binding site motif A (P-loop):Inosine/uridine-preferring nucleoside hydrolase	COG1957F	GO:0008152|GO:0008477|GO:0016787|GO:0016798
BAbS19_II00060	Bacterial inner-membrane translocator	COG4603R	GO:0000004|GO:0005554|GO:0008372
BAbS19_II00070	ATP/GTP-binding site motif A (P-loop):ABC transporter:AAA ATPase	COG3845R	GO:0000166|GO:0000166|GO:0005524|GO:0005524|GO:0016020|GO:0016020|GO:0016887|GO:0017111
BAbS19_II00080	Adenine nucleotide translocator 1:Basic membrane lipoprotein	COG1744R	GO:0000004|GO:0005554|GO:0008372
BAbS19_II00090	hypothetical protein	COG5664O	GO:0000004|GO:0005554|GO:0008372
BAbS19_II00100	Enterobactin synthetase, component D:Phosphopantethiene-protein transferase domain	COG2977Q	GO:0009239|GO:0009366|GO:0016740
BAbS19_II00110	Short-chain dehydrogenase/reductase SDR:Blood group Rhesus C/E and D polypeptide:Glucose/ribitol dehydrogenase	-	GO:0008152|GO:0008152|GO:0008667|GO:0008667|GO:0009239|GO:0016491|GO:0016491|GO:0016491
BAbS19_II00120	Isochorismatase hydrolase family:Isochorismatase:Phosphopantetheine attachment site:Phosphopantetheine-binding domain	COG1535Q	GO:0003824|GO:0008152|GO:0008908|GO:0008908|GO:0009058|GO:0016787|GO:0048037
BAbS19_II00130	Eubacterial/plasma membrane H+-transporting two-sector ATPase, C subunit:AMP-dependent synthetase and ligase	COG1021Q	GO:0008668|GO:0008668|GO:0016740|GO:0016779|GO:0016874|GO:0019290
BAbS19_II00140	Isochorismate synthase:Anthranilate synthase component I and chorismate binding protein	COG1168E	GO:0008909|GO:0008909|GO:0009058|GO:0009058|GO:0016853
BAbS19_II00150	Condensation domain	COG1020Q	GO:0000004|GO:0005554|GO:0008372
BAbS19_II00160	Eukaryotic molybdopterin oxidoreductase:Twin-arginine translocation pathway signal	COG2041R	GO:0006118|GO:0009703|GO:0016491
BAbS19_II00170	Nickel-dependent hydrogenase b-type cytochrome subunit	COG4117C	GO:0000004|GO:0005554|GO:0008372
BAbS19_II00180	hypothetical protein	-	GO:0000004|GO:0005554|GO:0008372
BAbS19_II00190	Sigma-70 region 2	COG1595K	GO:0003677|GO:0003700|GO:0006352|GO:0006355|GO:0016987
BAbS19_II00200	extracytoplasmic function alteRNAtive sigma factor	COG4944S	GO:0000004|GO:0005554|GO:0008372
BAbS19_II00210	Bacterial regulatory protein, GntR family	COG2186K	GO:0003677|GO:0003700|GO:0005622|GO:0006350|GO:0006355|GO:0006355
BAbS19_II00220	Leu/Ile/Val-binding protein family	COG0683E	GO:0005279|GO:0006865|GO:0030288
BAbS19_II00230	Bacterial inner-membrane translocator	COG0559E	GO:0000004|GO:0005554|GO:0008372
BAbS19_II00240	Bacterial inner-membrane translocator	COG4177E	GO:0000004|GO:0005554|GO:0008372
BAbS19_II00250	ATP/GTP-binding site motif A (P-loop):ABC transporter:AAA ATPase	COG0411E	GO:0000166|GO:0000166|GO:0005524|GO:0005524|GO:0016020|GO:0016020|GO:0016887|GO:0017111
BAbS19_II00260	ABC transporter:AAA ATPase	COG0410E	GO:0000166|GO:0000166|GO:0005524|GO:0005524|GO:0016020|GO:0016020|GO:0016887|GO:0017111
BAbS19_II00270	Glyoxalase/Bleomycin resistance protein/dioxygenase domain	COG0346E	GO:0016702
BAbS19_II00280	Short-chain dehydrogenase/reductase SDR:Glucose/ribitol dehydrogenase	-	GO:0004316|GO:0008152|GO:0008152|GO:0016491|GO:0016491|GO:0016491
BAbS19_II00290	oxidoreductase, short-chain dehydrogenase/reductase family	-	GO:0008152|GO:0008152|GO:0016491|GO:0016491|GO:0016491
BAbS19_II00300	Dehydrogenase, E1 component:Transketolase, central region:Transketolase, C terminal	COG1071C	GO:0003863|GO:0016491
BAbS19_II00310	Biotin/lipoyl attachment:Catalytic domain of components of various dehydrogenase complexes:2-oxo acid dehydrogenase, acyltran...	COG0508C	GO:0004742|GO:0004742|GO:0006096|GO:0008152|GO:0008415|GO:0008415|GO:0016740|GO:0031405|GO:0045254
BAbS19_II00320	Shikimate/quinate 5-dehydrogenase	COG0169E	GO:0016491
[truncated: 1,066 more rows]
