# Supplementary material for: Genome Sequence of Brucella abortus Vaccine Strain S19 Compared to Virulent Strains Yields Candidate Virulence Genes
Source: PLoS One. 2008 May 14;3(5):e2193. doi: 10.1371/journal.pone.0002193 (PMC2364660; doi:10.1371/journal.pone.0002193)
Supplement: Table S3 — Pair-wise and reciprocal comparisons between the genes and the genomes of the strains S19, 9–941 and 2308 (1.29 MB XLS) [file pone.0002193.s003.xls]

## Sheet: 3A.S19_genes_to_9_941_genome
Table S3A. Pair-wise and reciprocal comparisons between the genes and the genomes of the strains S19, 9-941 and 2308
Locus ID	GC content (%)	corresponding 941 gene	type of difference
BAbS19_I00120	59.54	no match	137 bases insertion
BAbS19_I00660	52.1	BruAb1_0072	1695 bases deletion
BAbS19_I10020	56.76	no match	32 bases insertion
BAbS19_II00100	62.21	no match	49 bases insertion
BAbS19_II03540	61.4	BruAb2_0372	68 bases deletion
BAbS19_II03470	60.36	BruAb2_0365 # BruAb2_0366	705 bases deletion
BAbS19_II08250	60.19	BruAb2_0872	eighteen bases insertion
BAbS19_II01580	59.45	BruAb2_0168	fifteen bases deletion
BAbS19_I16930	62.72	BruAb1_1784	twelve bases deletion
BAbS19_I07620	61.58	no match	Seven, four bases deletion and three bases insertion
BAbS19_I11200	57.76	BruAb1_1187	two, one base difference and one base deletion
BAbS19_II05380	58.71	BruAb2_0559	two, one base difference and one base deletion
BAbS19_I18830	44.79	no match	four, one base difference and three bases deletion
BAbS19_I04130	56.9	BruAb1_0443	two bases difference
BAbS19_I05230	50.74	BruAb1_0560	two bases difference
BAbS19_II02680	61.52	BruAb2_0279	two bases difference
BAbS19_II07300	60.89	no match	two bases difference
BAbS19_II02410	59.69	BruAb2_0252	two bases difference
BAbS19_I02220	60.9	BruAb1_0229	one base deletion
BAbS19_I06690	56.29	BruAb1_0714	one base deletion
BAbS19_I16480	59.22	BruAb1_1735	one base deletion
BAbS19_I17170	55.3	no match	one base deletion
BAbS19_I17420	47.75	BruAb1_1835	one base deletion
BAbS19_II09770	54.37	no match	one base deletion
BAbS19_I02810	59.78	no match	one base insertion
BAbS19_I12650	58.16	BruAb1_1333	one base insertion
BAbS19_II03610	56.98	BruAb2_0379	one base insertion
BAbS19_II09200	54.69	BruAb2_0972	one base insertion
BAbS19_II09620	60.53	BruAb2_1016	one base insertion
BAbS19_I00100	56.02	BruAb1_0010	one base difference
BAbS19_I00200	54.81	BruAb1_0023	one base difference
BAbS19_I00220	61.2	BruAb1_0025	one base difference
BAbS19_I00540	59.62	BruAb1_0060	one base difference
BAbS19_I00940	59.73	BruAb1_0099	one base difference
BAbS19_I01030	60.48	BruAb1_0108	one base difference
BAbS19_I01120	56.31	BruAb1_0117	one base difference
BAbS19_I01410	59.96	BruAb1_0146	one base difference
BAbS19_I01720	57.51	BruAb1_0177	one base difference
BAbS19_I01790	59.24	BruAb1_0184	one base difference
BAbS19_I02010	57.38	BruAb1_0208	one base difference
BAbS19_I02210	59.72	BruAb1_0228	one base difference
BAbS19_I02230	57.73	BruAb1_0230	one base difference
BAbS19_I02570	52.05	BruAb1_0277	one base difference
BAbS19_I02760	58.61	BruAb1_0300	one base difference
BAbS19_I02900	59.34	BruAb1_0315	one base difference
BAbS19_I03210	56.53	BruAb1_0347	one base difference
BAbS19_I03350	61.32	BruAb1_0363	one base difference
BAbS19_I03690	52.99	BruAb1_0395	one base difference
BAbS19_I03730	59.59	BruAb1_0399	one base difference
BAbS19_I04670	58.64	BruAb1_0500	one base difference
BAbS19_I04860	63.46	BruAb1_0519	one base difference
BAbS19_I04990	55.95	BruAb1_0533	one base difference
BAbS19_I05150	58.54	BruAb1_0983	one base difference
BAbS19_I05160	49.45	BruAb1_0132	one base difference
BAbS19_I05700	64.92	BruAb1_0606	one base difference
BAbS19_I05890	58.66	BruAb1_0624	one base difference
BAbS19_I05960	60.03	BruAb1_0631	one base difference
BAbS19_I05970	58.9	BruAb1_0632	one base difference
BAbS19_I06000	60.71	BruAb1_0635	one base difference
BAbS19_I06190	57.02	BruAb1_0657	one base difference
BAbS19_I06220	59.65	BruAb1_0661	one base difference
BAbS19_I06310	56.35	BruAb1_0671	one base difference
BAbS19_I06570	59.57	BruAb1_0701	one base difference
BAbS19_I06740	58.12	BruAb1_0719	one base difference
BAbS19_I06790	58.08	BruAb1_0724	one base difference
BAbS19_I07270	58.67	BruAb1_0772	one base difference
BAbS19_I07380	61.85	BruAb1_0783	one base difference
BAbS19_I07640	44.26	BruAb1_0814	one base difference
BAbS19_I07700	58.68	BruAb1_0820	one base difference
BAbS19_I07710	59.33	BruAb1_0821	one base difference
BAbS19_I07890	51.45	BruAb1_0841	one base difference
BAbS19_I08220	55.01	BruAb1_0874	one base difference
BAbS19_I08230	59.34	BruAb1_0875	one base difference
BAbS19_I08270	62.06	BruAb1_0879	one base difference
BAbS19_I08590	53.57	BruAb1_0912	one base difference
BAbS19_I08740	42.11	no match	one base difference
BAbS19_I08760	50.92	BruAb1_0929	one base difference
BAbS19_I08920	51.65	BruAb1_0945	one base difference
BAbS19_I09000	59.16	BruAb1_0954	one base difference
BAbS19_I09030	52.92	no match	one base difference
BAbS19_I09450	54.22	BruAb1_1006	one base difference
BAbS19_I09530	50.88	BruAb1_1014	one base difference
BAbS19_I09570	58.91	BruAb1_1018	one base difference
BAbS19_I09680	59.67	BruAb1_1029	one base difference
BAbS19_I09800	52.28	BruAb1_1041	one base difference
BAbS19_I10070	55.84	BruAb1_1068	one base difference
BAbS19_I10500	56.31	BruAb1_1114	one base difference
BAbS19_I10690	57.58	BruAb1_1134	one base difference
BAbS19_I10750	55.56	BruAb1_1140	one base difference
BAbS19_I11240	54.14	BruAb1_1191	one base difference
BAbS19_I11290	55.92	BruAb1_1196	one base difference
BAbS19_I11740	56.98	BruAb1_1241	one base difference
BAbS19_I11810	58.57	BruAb1_1250	one base difference
BAbS19_I12190	58.78	BruAb1_1289	one base difference
BAbS19_I12390	62.39	BruAb1_1307	one base difference
BAbS19_I12520	55.33	BruAb1_1321	one base difference
BAbS19_I12780	57.42	BruAb1_1347	one base difference
BAbS19_I12790	56.05	no match	one base difference
BAbS19_I12800	58.9	no match	one base difference
BAbS19_I12830	54.96	BruAb1_1351	one base difference
BAbS19_I12990	56.34	BruAb1_1368	one base difference
BAbS19_I13030	58.88	BruAb1_1371	one base difference
BAbS19_I13510	60.62	BruAb1_1421	one base difference
BAbS19_I13700	59.47	BruAb1_1442	one base difference
BAbS19_I13950	55.78	BruAb1_1470	one base difference
BAbS19_I13990	56.91	BruAb1_1474	one base difference
BAbS19_I14040	61.06	BruAb1_1479	one base difference
BAbS19_I14270	60.18	BruAb1_1504	one base difference
BAbS19_I14710	62	BruAb1_1545	one base difference
BAbS19_I14770	56.29	BruAb1_1551	one base difference
BAbS19_I14830	58.33	BruAb1_1558	one base difference
BAbS19_I15130	56.64	BruAb1_1589	one base difference
BAbS19_I15170	58.88	BruAb1_1596	one base difference
BAbS19_I15200	57.24	BruAb1_1598	one base difference
BAbS19_I15330	54.16	BruAb1_1609	one base difference
BAbS19_I15450	53.46	BruAb1_1622	one base difference
BAbS19_I15770	58.92	BruAb1_1658	one base difference
BAbS19_I15870	56.11	BruAb1_1669	one base difference
BAbS19_I16290	60.54	BruAb1_1716	one base difference
BAbS19_I16320	61.25	BruAb1_1719	one base difference
BAbS19_I16830	60.41	BruAb1_1774	one base difference
BAbS19_I16960	59.15	BruAb1_1787	one base difference
BAbS19_I17310	61.14	BruAb1_1822	one base difference
BAbS19_I17470	59	BruAb1_1840	one base difference
BAbS19_I17710	62.49	BruAb1_1866	one base difference
BAbS19_I17770	61.17	BruAb1_1872	one base difference
BAbS19_I17960	58.07	BruAb1_1891	one base difference
BAbS19_I18360	60.26	BruAb1_1933	one base difference
BAbS19_I18870	51.67	no match	one base difference
BAbS19_I18920	60.61	BruAb1_1993	one base difference
BAbS19_I18950	61.6	BruAb1_1996	one base difference
BAbS19_I19220	59.34	BruAb1_2026	one base difference
BAbS19_I19400	57.73	BruAb1_2046	one base difference
BAbS19_I19430	55.46	BruAb1_2049	one base difference
BAbS19_I19650	60.54	BruAb1_2074	one base difference
BAbS19_I19990	57.58	BruAb1_2108	one base difference
BAbS19_I20400	58.12	no match	one base difference
BAbS19_II00040	61.78	BruAb2_0005	one base difference
BAbS19_II00980	56.73	BruAb2_0107	one base difference
BAbS19_II01690	59.48	BruAb2_0179	one base difference
BAbS19_II01950	61.98	BruAb2_0207	one base difference
BAbS19_II02350	58.95	BruAb2_0247	one base difference
BAbS19_II02690	58.37	BruAb2_0280	one base difference
BAbS19_II02920	59.54	BruAb2_0306	one base difference
BAbS19_II03130	59.27	BruAb2_0328	one base difference
BAbS19_II03440	59.21	BruAb2_0362	one base difference
BAbS19_II03720	52.7	BruAb2_0390	one base difference
BAbS19_II04060	55.86	BruAb2_0426	one base difference
BAbS19_II04190	57.74	BruAb2_0439	one base difference
BAbS19_II04440	49.04	BruAb2_0463	one base difference
BAbS19_II04500	58.81	BruAb2_0469	one base difference
BAbS19_II04700	55.33	no match	one base difference
BAbS19_II04960	60.43	BruAb2_0517	one base difference
BAbS19_II05280	59.93	BruAb2_0549	one base difference
BAbS19_II05440	59.82	BruAb2_0567	one base difference
BAbS19_II05480	56.1	BruAb2_0571	one base difference
BAbS19_II05850	59.02	BruAb2_0611	one base difference
BAbS19_II05930	60.2	BruAb2_0619	one base difference
BAbS19_II05940	59.83	BruAb2_0620	one base difference
BAbS19_II06090	54.9	BruAb2_0636	one base difference
BAbS19_II06180	60.69	BruAb2_0645	one base difference
BAbS19_II06390	57.59	BruAb2_0668	one base difference
BAbS19_II06420	57.45	BruAb2_0672	one base difference
BAbS19_II06590	58.27	BruAb2_0691	one base difference
BAbS19_II07260	57.58	BruAb2_0768	one base difference
BAbS19_II07580	58.59	BruAb2_0798	one base difference
BAbS19_II07850	56.93	BruAb2_0827	one base difference
BAbS19_II07900	61.68	BruAb2_0832	one base difference
BAbS19_II07980	55.77	BruAb2_0842	one base difference
BAbS19_II08040	59.15	no match	one base difference
BAbS19_II08230	60.76	no match	one base difference
BAbS19_II08290	57.9	BruAb2_0877	one base difference
BAbS19_II08330	60.62	BruAb2_0882	one base difference
BAbS19_II08550	59.34	BruAb2_0903	one base difference
BAbS19_II09030	58.35	BruAb2_0952	one base difference
BAbS19_II09580	57.41	BruAb2_1010	one base difference
BAbS19_II09710	58.74	BruAb2_1025	one base difference
BAbS19_II09870	55.01	BruAb2_1040	one base difference
BAbS19_II10230	57.51	BruAb2_1076	one base difference
BAbS19_II10300	59.61	BruAb2_1083	one base difference
BAbS19_II10380	61.55	BruAb2_1092	one base difference
BAbS19_II10480	60.09	no match	one base difference
BAbS19_II10510	60.62	BruAb2_1104	one base difference
BAbS19_II10520	61.05	BruAb2_1105	one base difference
BAbS19_II10700	57.22	BruAb2_1123	one base difference
BAbS19_I00010	59.48	BruAb1_0001	identical
BAbS19_I00020	58.27	BruAb1_0002	identical
BAbS19_I00030	61.39	BruAb1_0003	identical
BAbS19_I00040	61.61	BruAb1_0004	identical
BAbS19_I00050	57.37	BruAb1_0005	identical
BAbS19_I00060	59.05	BruAb1_0006	identical
BAbS19_I00070	57.89	BruAb1_0007	identical
BAbS19_I00080	55.83	BruAb1_0008	identical
BAbS19_I00090	57.34	BruAb1_0009	identical
BAbS19_I00110	48.26	BruAb1_0012	identical
BAbS19_I00130	61.51	BruAb1_0016	identical
BAbS19_I00140	59.38	BruAb1_0017	identical
BAbS19_I00150	62.3	BruAb1_0018	identical
BAbS19_I00160	61.62	BruAb1_0019	identical
BAbS19_I00170	58.78	BruAb1_0020	identical
BAbS19_I00180	59.81	no match	identical
BAbS19_I00190	53.33	BruAb1_0022	identical
BAbS19_I00210	55.99	BruAb1_0024	identical
BAbS19_I00230	62.73	BruAb1_0026	identical
BAbS19_I00240	57.91	BruAb1_0027	identical
BAbS19_I00250	59.74	BruAb1_0028	identical
BAbS19_I00260	57.33	BruAb1_0029	identical
BAbS19_I00270	55.22	BruAb1_0031	identical
BAbS19_I00280	59.51	BruAb1_0032	identical
BAbS19_I00290	59.88	BruAb1_0033	identical
BAbS19_I00300	61.91	BruAb1_0034	identical
BAbS19_I00310	61.48	BruAb1_0035	identical
BAbS19_I00320	60.02	BruAb1_0036	identical
BAbS19_I00330	58.8	BruAb1_0037	identical
BAbS19_I00340	60.58	BruAb1_0038	identical
BAbS19_I00350	58.38	BruAb1_0039	identical
BAbS19_I00360	61	BruAb1_0040	identical
BAbS19_I00370	56.02	BruAb1_0042	identical
BAbS19_I00400	57.94	BruAb1_0044	identical
BAbS19_I00410	55.46	BruAb1_0045	identical
BAbS19_I00420	62.57	no match	identical
BAbS19_I00430	59.02	BruAb1_0048	identical
BAbS19_I00440	59.79	BruAb1_0049	identical
BAbS19_I00450	57.44	BruAb1_0050	identical
BAbS19_I00460	55.56	BruAb1_0051	identical
BAbS19_I00470	59.22	BruAb1_0052	identical
BAbS19_I00480	60.38	BruAb1_0053	identical
BAbS19_I00490	58.61	BruAb1_0054	identical
BAbS19_I00500	59.65	BruAb1_0055	identical
BAbS19_I00510	58.33	BruAb1_0056	identical
BAbS19_I00520	62.2	BruAb1_0057	identical
BAbS19_I00530	57.84	BruAb1_0058	identical
BAbS19_I00550	54.65	BruAb1_0061	identical
BAbS19_I00560	58.94	BruAb1_0062	identical
BAbS19_I00570	58.84	BruAb1_0063	identical
BAbS19_I00580	52.6	BruAb1_0064	identical
BAbS19_I00590	46.67	BruAb1_0065	identical
BAbS19_I00600	51.85	BruAb1_0066	identical
BAbS19_I00610	62.38	BruAb1_0067	identical
BAbS19_I00620	57.84	BruAb1_0068	identical
BAbS19_I00630	60.57	BruAb1_0069	identical
BAbS19_I00640	65.01	BruAb1_0070	identical
BAbS19_I00650	64	BruAb1_0071	identical
BAbS19_I00670	58.23	BruAb1_0074	identical
BAbS19_I00680	56.82	BruAb1_0075	identical
BAbS19_I00690	57.94	BruAb1_0076	identical
BAbS19_I00700	59.14	BruAb1_0077	identical
BAbS19_I00710	57.54	BruAb1_0078	identical
BAbS19_I00720	63.54	BruAb1_0079	identical
BAbS19_I00730	54.76	BruAb1_0080	identical
BAbS19_I00740	55.89	no match	identical
BAbS19_I00750	61.25	BruAb1_0082	identical
BAbS19_I00760	56.06	BruAb1_0083	identical
BAbS19_I00770	61.87	BruAb1_0084	identical
BAbS19_I00780	61.73	BruAb1_0085	identical
BAbS19_I00790	57.86	BruAb1_0086	identical
BAbS19_I00820	54.73	BruAb1_0088	identical
BAbS19_I00830	56.99	BruAb1_0089	identical
BAbS19_I00840	56.74	no match	identical
BAbS19_I00850	60.27	BruAb1_0090	identical
BAbS19_I00860	58.33	BruAb1_0091	identical
BAbS19_I00870	62.31	BruAb1_0092	identical
BAbS19_I00880	58.3	BruAb1_0093	identical
BAbS19_I00890	56.9	BruAb1_0094	identical
BAbS19_I00900	59.31	BruAb1_0095	identical
BAbS19_I00910	61	BruAb1_0096	identical
BAbS19_I00920	54.35	BruAb1_0097	identical
BAbS19_I00930	61.57	BruAb1_0098	identical
BAbS19_I00950	49.37	BruAb1_0100	identical
BAbS19_I00960	56.79	BruAb1_0101	identical
BAbS19_I00970	55.76	BruAb1_0102	identical
BAbS19_I00980	54.42	BruAb1_0103	identical
BAbS19_I00990	57.73	BruAb1_0104	identical
BAbS19_I01000	59.4	BruAb1_0105	identical
BAbS19_I01010	59.05	BruAb1_0106	identical
BAbS19_I01020	61.56	BruAb1_0107	identical
BAbS19_I01040	58.39	BruAb1_0109	identical
BAbS19_I01050	60.77	BruAb1_0110	identical
BAbS19_I01060	55.77	BruAb1_0111	identical
BAbS19_I01070	59.33	BruAb1_0112	identical
BAbS19_I01080	59.6	BruAb1_0113	identical
BAbS19_I01090	60.12	BruAb1_0114	identical
BAbS19_I01100	56.13	BruAb1_0115	identical
BAbS19_I01110	56.19	BruAb1_0116	identical
BAbS19_I01130	59.46	BruAb1_0118	identical
BAbS19_I01140	59.35	BruAb1_0120	identical
BAbS19_I01150	60.29	BruAb1_0121	identical
BAbS19_I01160	59.83	BruAb1_0122	identical
BAbS19_I01170	47.41	BruAb1_0123	identical
BAbS19_I01180	57.95	BruAb1_0124	identical
BAbS19_I01210	56.62	BruAb1_0126	identical
BAbS19_I01220	60.92	BruAb1_0127	identical
BAbS19_I01230	59.39	no match	identical
BAbS19_I01240	64.94	no match	identical
BAbS19_I01250	60.94	BruAb1_0130	identical
BAbS19_I01260	58.27	BruAb1_0131	identical
BAbS19_I01270	49.08	BruAb1_0132	identical
BAbS19_I01280	60.46	BruAb1_0134	identical
BAbS19_I01290	63.43	BruAb1_0135	identical
BAbS19_I01300	57.33	BruAb1_0136	identical
BAbS19_I01310	59.69	BruAb1_0137	identical
BAbS19_I01320	60.93	BruAb1_0138	identical
BAbS19_I01330	59.83	BruAb1_0139	identical
BAbS19_I01340	60.1	BruAb1_0140	identical
BAbS19_I01350	58.54	BruAb1_0141	identical
BAbS19_I01360	61.52	no match	identical
BAbS19_I01370	61.46	no match	identical
BAbS19_I01380	60.37	BruAb1_0143	identical
BAbS19_I01390	58.5	BruAb1_0144	identical
BAbS19_I01400	52.8	BruAb1_0145	identical
BAbS19_I01440	58.95	BruAb1_0148	identical
BAbS19_I01450	56.84	BruAb1_0149	identical
BAbS19_I01460	60.16	BruAb1_0150	identical
BAbS19_I01470	56.02	BruAb1_0151	identical
BAbS19_I01480	60.27	BruAb1_0152	identical
BAbS19_I01490	60.16	BruAb1_0153	identical
BAbS19_I01500	57.75	BruAb1_0154	identical
BAbS19_I01510	58.75	BruAb1_0156	identical
BAbS19_I01520	58.49	BruAb1_0157	identical
BAbS19_I01530	58.54	BruAb1_0158	identical
BAbS19_I01540	56.26	BruAb1_0159	identical
BAbS19_I01550	50.7	BruAb1_0160	identical
BAbS19_I01560	58.63	BruAb1_0161	identical
BAbS19_I01570	60.51	BruAb1_0162	identical
BAbS19_I01580	58.4	BruAb1_0163	identical
BAbS19_I01590	59.92	BruAb1_0165	identical
BAbS19_I01600	59.82	BruAb1_0166	identical
BAbS19_I01610	59.18	BruAb1_0167	identical
BAbS19_I01620	59.76	BruAb1_0168	identical
BAbS19_I01630	62.76	BruAb1_0169	identical
BAbS19_I01640	58.62	no match	identical
BAbS19_I01650	57.21	no match	identical
BAbS19_I01660	59.58	BruAb1_0171	identical
BAbS19_I01670	60.41	BruAb1_0172	identical
BAbS19_I01680	62.28	BruAb1_0173	identical
BAbS19_I01690	61.42	BruAb1_0174	identical
BAbS19_I01700	64.15	BruAb1_0175	identical
BAbS19_I01710	62.71	BruAb1_0176	identical
BAbS19_I01730	63.37	BruAb1_0178	identical
BAbS19_I01740	59.24	BruAb1_0179	identical
BAbS19_I01750	53.4	BruAb1_0180	identical
BAbS19_I01760	59.41	BruAb1_0181	identical
BAbS19_I01770	56.91	BruAb1_0182	identical
BAbS19_I01780	57.85	BruAb1_0183	identical
BAbS19_I01800	51.32	BruAb1_0185	identical
BAbS19_I01810	59.52	BruAb1_0186	identical
BAbS19_I01820	55.7	BruAb1_0188	identical
BAbS19_I01830	58.14	BruAb1_0189	identical
BAbS19_I01840	61.35	BruAb1_0190	identical
BAbS19_I01850	55.76	BruAb1_0191	identical
BAbS19_I01860	57.32	BruAb1_0192	identical
BAbS19_I01870	58.33	BruAb1_0194	identical
BAbS19_I01880	60.38	BruAb1_0195	identical
BAbS19_I01890	64.81	BruAb1_0196	identical
BAbS19_I01920	59.03	BruAb1_0198	identical
BAbS19_I01930	59.82	BruAb1_0199	identical
BAbS19_I01940	59.82	BruAb1_0200	identical
BAbS19_I01980	59.21	BruAb1_0205	identical
BAbS19_I01990	63.19	BruAb1_0206	identical
BAbS19_I02000	58.94	BruAb1_0207	identical
BAbS19_I02020	60.95	BruAb1_0209	identical
BAbS19_I02030	62.65	BruAb1_0210	identical
BAbS19_I02040	59.09	BruAb1_0211	identical
BAbS19_I02050	63.38	BruAb1_0212	identical
BAbS19_I02060	62.67	BruAb1_0213	identical
BAbS19_I02070	57.72	BruAb1_0214	identical
BAbS19_I02080	62.11	BruAb1_0215	identical
BAbS19_I02090	58.67	BruAb1_0216	identical
BAbS19_I02100	61.31	BruAb1_0217	identical
BAbS19_I02110	63.58	BruAb1_0218	identical
BAbS19_I02120	62.29	BruAb1_0219	identical
BAbS19_I02130	56.45	BruAb1_0220	identical
BAbS19_I02140	45.62	BruAb1_0221	identical
BAbS19_I02150	60.82	BruAb1_0222	identical
BAbS19_I02160	59.65	no match	identical
BAbS19_I02170	58.82	BruAb1_0225	identical
BAbS19_I02200	57.48	BruAb1_0227	identical
BAbS19_I02240	58.95	BruAb1_0231	identical
BAbS19_I02250	59.82	BruAb1_0232	identical
BAbS19_I02260	60.26	BruAb1_0233	identical
BAbS19_I02270	59.79	BruAb1_0234	identical
BAbS19_I02280	51.01	BruAb1_0235	identical
BAbS19_I02290	60.46	BruAb1_0236	identical
BAbS19_I02300	52.38	BruAb1_0237	identical
BAbS19_I02310	61.5	BruAb1_0238	identical
BAbS19_I02320	58.98	BruAb1_0239	identical
BAbS19_I02330	58.53	BruAb1_0240	identical
BAbS19_I02340	55.47	BruAb1_0245	identical
BAbS19_I02350	55.71	BruAb1_0247	identical
BAbS19_I02360	53.02	BruAb1_0249	identical
BAbS19_I02370	59.86	BruAb1_0250	identical
BAbS19_I02400	53.88	BruAb1_0252	identical
BAbS19_I02410	53.79	BruAb1_0253	identical
BAbS19_I02420	51.41	BruAb1_0254	identical
BAbS19_I02430	55.96	BruAb1_0255	identical
BAbS19_I02460	52.94	BruAb1_0257	identical
BAbS19_I02470	55.56	BruAb1_0260	identical
BAbS19_I02480	48.82	BruAb1_0264	identical
BAbS19_I02490	53.66	BruAb1_0267	identical
BAbS19_I02500	54.39	BruAb1_0268	identical
BAbS19_I02510	51.89	BruAb1_0269	identical
BAbS19_I02520	56.48	BruAb1_0270	identical
BAbS19_I02530	52.55	BruAb1_0271	identical
BAbS19_I02540	46.98	BruAb1_0274	identical
BAbS19_I02550	60.19	BruAb1_0275	identical
BAbS19_I02560	60.98	BruAb1_0276	identical
BAbS19_I02580	58.65	BruAb1_0278	identical
BAbS19_I02590	58.8	BruAb1_0279	identical
BAbS19_I02600	61.79	BruAb1_0280	identical
BAbS19_I02610	55.1	BruAb1_0281	identical
BAbS19_I02620	60.93	BruAb1_0282	identical
BAbS19_I02630	52.42	BruAb1_0283	identical
BAbS19_I02640	55.63	BruAb1_0284	identical
BAbS19_I02650	55.56	no match	identical
BAbS19_I02660	58.25	BruAb1_0287	identical
BAbS19_I02670	54.66	no match	identical
BAbS19_I02680	52.56	BruAb1_0292	identical
BAbS19_I02690	61.68	BruAb1_0293	identical
BAbS19_I02700	60.4	BruAb1_0294	identical
BAbS19_I02710	57.84	BruAb1_0295	identical
BAbS19_I02720	60.36	BruAb1_0296	identical
BAbS19_I02730	59.5	BruAb1_0297	identical
BAbS19_I02740	63.17	BruAb1_0298	identical
BAbS19_I02750	57.26	BruAb1_0299	identical
BAbS19_I02770	60.68	BruAb1_0302	identical
BAbS19_I02780	60.28	BruAb1_0303	identical
BAbS19_I02820	55.12	BruAb1_0306	identical
BAbS19_I02830	60.95	BruAb1_0308	identical
BAbS19_I02840	61.2	BruAb1_0309	identical
BAbS19_I02850	56.29	BruAb1_0310	identical
BAbS19_I02860	60.55	BruAb1_0311	identical
BAbS19_I02870	58.76	BruAb1_0312	identical
BAbS19_I02880	60	BruAb1_0313	identical
BAbS19_I02890	58.88	BruAb1_0314	identical
BAbS19_I02910	56.19	BruAb1_0316	identical
BAbS19_I02920	59.88	BruAb1_0317	identical
BAbS19_I02930	60.2	BruAb1_0318	identical
BAbS19_I02940	52.98	BruAb1_0319	identical
BAbS19_I02950	58.24	BruAb1_0321	identical
BAbS19_I02960	58.21	BruAb1_0322	identical
BAbS19_I02970	56.77	BruAb1_0323	identical
BAbS19_I02980	60.9	BruAb1_0324	identical
BAbS19_I02990	61.33	BruAb1_0325	identical
BAbS19_I03000	55.43	BruAb1_0326	identical
BAbS19_I03010	59.74	BruAb1_0327	identical
BAbS19_I03020	57.61	BruAb1_0328	identical
BAbS19_I03030	58.26	BruAb1_0329	identical
BAbS19_I03040	56.74	BruAb1_0330	identical
BAbS19_I03050	59.48	BruAb1_0331	identical
BAbS19_I03060	61.08	BruAb1_0332	identical
BAbS19_I03070	59.88	BruAb1_0333	identical
BAbS19_I03080	53.18	BruAb1_0334	identical
BAbS19_I03090	59.83	BruAb1_0335	identical
BAbS19_I03100	59.73	BruAb1_0336	identical
BAbS19_I03110	60.37	BruAb1_0337	identical
BAbS19_I03120	58.19	BruAb1_0338	identical
BAbS19_I03130	58.77	BruAb1_0339	identical
BAbS19_I03140	58.99	BruAb1_0340	identical
BAbS19_I03150	58.57	BruAb1_0341	identical
BAbS19_I03160	60.72	BruAb1_0342	identical
BAbS19_I03170	53.7	BruAb1_0343	identical
BAbS19_I03180	52.52	BruAb1_0344	identical
BAbS19_I03190	58.53	BruAb1_0345	identical
BAbS19_I03200	57.41	BruAb1_0346	identical
BAbS19_I03220	52.1	BruAb1_0348	identical
BAbS19_I03230	48.92	BruAb1_0349	identical
BAbS19_I03240	59.37	BruAb1_0350	identical
BAbS19_I03250	61.9	BruAb1_0351	identical
BAbS19_I03260	62.71	BruAb1_0352	identical
BAbS19_I03270	58.94	BruAb1_0354	identical
BAbS19_I03280	61	BruAb1_0355	identical
BAbS19_I03290	62.44	BruAb1_0356	identical
BAbS19_I03300	54.83	BruAb1_0357	identical
BAbS19_I03310	53.76	no match	identical
BAbS19_I03320	51.02	BruAb1_0359	identical
BAbS19_I03330	52.73	BruAb1_0360	identical
BAbS19_I03340	55.23	BruAb1_0361	identical
BAbS19_I03360	43.52	BruAb1_0364	identical
BAbS19_I03390	59.39	BruAb1_0366	identical
BAbS19_I03400	58.48	BruAb1_0367	identical
BAbS19_I03410	55.92	BruAb1_0368	identical
BAbS19_I03420	54.24	BruAb1_0369	identical
BAbS19_I03430	59.46	BruAb1_0370	identical
BAbS19_I03440	58.51	BruAb1_0371	identical
BAbS19_I03450	59.83	BruAb1_0372	identical
BAbS19_I03460	61.13	BruAb1_0373	identical
BAbS19_I03470	56.52	BruAb1_0374	identical
BAbS19_I03480	61.05	BruAb1_0375	identical
BAbS19_I03490	59.73	BruAb1_0376	identical
BAbS19_I03500	64.2	no match	identical
BAbS19_I03510	58.99	BruAb1_0377	identical
BAbS19_I03520	58.36	BruAb1_0378	identical
BAbS19_I03530	58.43	BruAb1_0379	identical
BAbS19_I03540	58.7	BruAb1_0380	identical
BAbS19_I03550	62.08	BruAb1_0381	identical
BAbS19_I03560	53.46	BruAb1_0382	identical
BAbS19_I03570	60.82	BruAb1_0383	identical
BAbS19_I03580	56.83	BruAb1_0384	identical
BAbS19_I03590	58.28	BruAb1_0385	identical
BAbS19_I03600	60.88	BruAb1_0386	identical
BAbS19_I03610	49.69	BruAb1_0387	identical
BAbS19_I03620	58.88	BruAb1_0388	identical
BAbS19_I03630	57.87	BruAb1_0389	identical
BAbS19_I03640	58.82	BruAb1_0390	identical
BAbS19_I03650	52.02	BruAb1_0391	identical
BAbS19_I03660	57.24	BruAb1_0392	identical
BAbS19_I03670	60.54	no match	identical
BAbS19_I03680	59.39	BruAb1_0394	identical
BAbS19_I03700	60.06	BruAb1_0396	identical
BAbS19_I03710	61.78	BruAb1_0397	identical
BAbS19_I03720	55.93	BruAb1_0398	identical
BAbS19_I03740	62.5	BruAb1_0400	identical
BAbS19_I03750	61.57	BruAb1_0401	identical
BAbS19_I03760	57.02	BruAb1_0402	identical
BAbS19_I03770	52.38	BruAb1_0403	identical
BAbS19_I03780	60.39	BruAb1_0404	identical
BAbS19_I03790	56.14	BruAb1_0406	identical
BAbS19_I03800	55.87	BruAb1_0407	identical
BAbS19_I03810	62.28	BruAb1_0408	identical
BAbS19_I03820	63	BruAb1_0409	identical
BAbS19_I03830	56.25	BruAb1_0410	identical
BAbS19_I03840	63.76	BruAb1_0411	identical
BAbS19_I03850	61.13	BruAb1_0412	identical
BAbS19_I03860	62.33	BruAb1_0413	identical
BAbS19_I03870	58.23	BruAb1_0414	identical
BAbS19_I03880	56.14	BruAb1_0415	identical
BAbS19_I03890	60.22	BruAb1_0418	identical
BAbS19_I03900	60.75	BruAb1_0419	identical
BAbS19_I03910	59.48	no match	identical
BAbS19_I03920	65.26	BruAb1_0422	identical
BAbS19_I03930	53.07	BruAb1_0423	identical
BAbS19_I03940	61.95	BruAb1_0424	identical
BAbS19_I03950	59.11	BruAb1_0425	identical
BAbS19_I03960	57.1	BruAb1_0426	identical
BAbS19_I03970	54.39	no match	identical
BAbS19_I03980	59.85	BruAb1_0427	identical
BAbS19_I03990	64.92	BruAb1_0428	identical
BAbS19_I04000	59.02	BruAb1_0429	identical
BAbS19_I04010	52.52	BruAb1_0430	identical
BAbS19_I04020	54.79	BruAb1_0431	identical
BAbS19_I04030	62.08	BruAb1_0433	identical
BAbS19_I04040	60.69	BruAb1_0434	identical
BAbS19_I04050	61.16	BruAb1_0435	identical
BAbS19_I04060	57.85	BruAb1_0436	identical
BAbS19_I04070	61.14	BruAb1_0437	identical
BAbS19_I04080	61.48	BruAb1_0438	identical
BAbS19_I04090	60.13	BruAb1_0439	identical
BAbS19_I04100	56.26	BruAb1_0440	identical
BAbS19_I04110	60.19	BruAb1_0441	identical
BAbS19_I04120	48.15	BruAb1_0442	identical
BAbS19_I04140	58.71	BruAb1_0444	identical
BAbS19_I04150	53.33	BruAb1_0445	identical
BAbS19_I04160	55.87	BruAb1_0447	identical
BAbS19_I04170	60.06	BruAb1_0448	identical
BAbS19_I04180	50	BruAb1_0449	identical
BAbS19_I04190	60.82	BruAb1_0450	identical
BAbS19_I04200	60.22	no match	identical
BAbS19_I04210	58.25	BruAb1_0452	identical
BAbS19_I04220	56.86	BruAb1_0453	identical
BAbS19_I04230	57.61	BruAb1_0454	identical
BAbS19_I04240	52.87	BruAb1_0455	identical
BAbS19_I04250	63.78	BruAb1_0456	identical
BAbS19_I04260	60.94	BruAb1_0457	identical
BAbS19_I04270	62.01	BruAb1_0458	identical
BAbS19_I04280	61.81	BruAb1_0459	identical
BAbS19_I04290	63.62	BruAb1_0460	identical
BAbS19_I04300	57.71	BruAb1_0461	identical
BAbS19_I04310	51.64	BruAb1_0462	identical
BAbS19_I04320	61.82	BruAb1_0463	identical
BAbS19_I04330	58.24	BruAb1_0464	identical
BAbS19_I04340	59.51	BruAb1_0465	identical
BAbS19_I04350	59.26	BruAb1_0466	identical
BAbS19_I04360	61	BruAb1_0467	identical
BAbS19_I04370	58.95	BruAb1_0468	identical
BAbS19_I04380	58.38	BruAb1_0470	identical
BAbS19_I04390	62.46	BruAb1_0471	identical
BAbS19_I04400	58.57	BruAb1_0472	identical
BAbS19_I04410	55.97	BruAb1_0473	identical
BAbS19_I04420	58.25	BruAb1_0474	identical
BAbS19_I04430	62.28	BruAb1_0475	identical
BAbS19_I04440	58.63	BruAb1_0476	identical
BAbS19_I04450	61.52	BruAb1_0477	identical
BAbS19_I04460	61.48	BruAb1_0479	identical
BAbS19_I04470	59.08	BruAb1_0480	identical
BAbS19_I04480	53.59	BruAb1_0481	identical
BAbS19_I04490	62.07	BruAb1_0483	identical
BAbS19_I04500	59	BruAb1_0484	identical
BAbS19_I04510	61.44	BruAb1_0485	identical
BAbS19_I04520	57.77	BruAb1_0486	identical
BAbS19_I04530	61.15	BruAb1_0487	identical
BAbS19_I04540	64.07	BruAb1_0488	identical
BAbS19_I04550	58.36	BruAb1_0489	identical
BAbS19_I04560	59.86	BruAb1_0490	identical
BAbS19_I04570	58.05	no match	identical
BAbS19_I04600	57.79	BruAb1_0494	identical
BAbS19_I04630	60.13	BruAb1_0496	identical
BAbS19_I04640	58.79	BruAb1_0497	identical
BAbS19_I04650	58.72	BruAb1_0498	identical
BAbS19_I04660	59.78	BruAb1_0499	identical
BAbS19_I04680	59.55	BruAb1_0501	identical
BAbS19_I04690	59.19	BruAb1_0502	identical
BAbS19_I04700	60.14	BruAb1_0503	identical
BAbS19_I04710	54.95	BruAb1_0504	identical
BAbS19_I04720	59.16	BruAb1_0505	identical
BAbS19_I04730	58.76	BruAb1_0506	identical
BAbS19_I04740	47.97	BruAb1_0507	identical
BAbS19_I04750	55.27	BruAb1_0508	identical
BAbS19_I04760	56.27	BruAb1_0509	identical
BAbS19_I04770	56.99	BruAb1_0510	identical
BAbS19_I04780	59.97	BruAb1_0511	identical
BAbS19_I04790	61.69	BruAb1_0512	identical
BAbS19_I04800	59.69	BruAb1_0513	identical
BAbS19_I04810	57.61	BruAb1_0514	identical
BAbS19_I04820	60.46	BruAb1_0515	identical
BAbS19_I04830	60.98	BruAb1_0516	identical
BAbS19_I04840	53.33	BruAb1_0517	identical
BAbS19_I04850	54.28	BruAb1_0518	identical
BAbS19_I04870	58.16	no match	identical
BAbS19_I04880	56.83	BruAb1_0521	identical
BAbS19_I04890	60.85	BruAb1_0522	identical
BAbS19_I04900	57.26	BruAb1_0523	identical
BAbS19_I04910	60.69	BruAb1_0525	identical
BAbS19_I04920	59.01	BruAb1_0526	identical
BAbS19_I04930	61.26	BruAb1_0527	identical
BAbS19_I04940	59.5	BruAb1_0528	identical
BAbS19_I04950	55.88	BruAb1_0529	identical
BAbS19_I04960	58.26	BruAb1_0530	identical
BAbS19_I04970	57.95	BruAb1_0531	identical
BAbS19_I04980	56.66	BruAb1_0532	identical
BAbS19_I05000	58.36	BruAb1_0535	identical
BAbS19_I05010	58.25	BruAb1_0535	identical
BAbS19_I05020	54.55	no match	identical
BAbS19_I05030	53.17	BruAb1_0538	identical
BAbS19_I05040	56.44	no match	identical
BAbS19_I05050	46.3	no match	identical
BAbS19_I05060	45.13	BruAb1_0540	identical
BAbS19_I05070	44.56	BruAb1_0541	identical
BAbS19_I05080	49.01	BruAb1_0542	identical
BAbS19_I05090	45.99	BruAb1_0543	identical
BAbS19_I05100	47.28	BruAb1_0544	identical
BAbS19_I05110	47.93	BruAb1_0545	identical
BAbS19_I05120	60.37	BruAb1_0546	identical
BAbS19_I05130	57.22	no match	identical
BAbS19_I05140	49.44	no match	identical
BAbS19_I05170	44.13	BruAb1_0552	identical
BAbS19_I05180	57.18	BruAb1_0553	identical
BAbS19_I05190	47.37	no match	identical
BAbS19_I05200	54.35	no match	identical
BAbS19_I05210	57.79	BruAb1_0557	identical
BAbS19_I05220	54.33	no match	identical
BAbS19_I05240	51.16	BruAb1_0561	identical
BAbS19_I05250	51.24	BruAb1_0562	identical
BAbS19_I05260	51.17	BruAb1_0563	identical
BAbS19_I05270	57.21	BruAb1_0564	identical
BAbS19_I05280	56.89	BruAb1_0565	identical
BAbS19_I05290	57.11	BruAb1_0566	identical
BAbS19_I05300	57.74	BruAb1_0567	identical
BAbS19_I05310	59.02	BruAb1_0568	identical
BAbS19_I05320	56.27	BruAb1_0569	identical
BAbS19_I05330	61.78	BruAb1_0570	identical
BAbS19_I05340	59.21	BruAb1_0571	identical
BAbS19_I05350	59.17	no match	identical
BAbS19_I05360	57.41	no match	identical
BAbS19_I05370	58.81	BruAb1_0574	identical
BAbS19_I05380	59.66	no match	identical
BAbS19_I05390	58.09	BruAb1_0576	identical
BAbS19_I05400	60.58	BruAb1_0577	identical
BAbS19_I05410	58.81	BruAb1_0578	identical
BAbS19_I05420	50	BruAb1_0579	identical
BAbS19_I05430	51.08	BruAb1_0580	identical
BAbS19_I05440	55.79	BruAb1_0581	identical
BAbS19_I05470	59.78	no match	identical
BAbS19_I05480	60.06	BruAb1_0584	identical
BAbS19_I05490	59.59	BruAb1_0585	identical
BAbS19_I05500	60.67	BruAb1_0586	identical
BAbS19_I05510	58.26	BruAb1_0587	identical
BAbS19_I05520	53.83	BruAb1_0588	identical
BAbS19_I05530	60.12	BruAb1_0589	identical
BAbS19_I05540	57.75	BruAb1_0590	identical
BAbS19_I05550	54.31	BruAb1_0591	identical
BAbS19_I05560	54.81	BruAb1_0592	identical
BAbS19_I05570	57.02	BruAb1_0593	identical
BAbS19_I05580	59.5	BruAb1_0594	identical
BAbS19_I05590	60.21	BruAb1_0595	identical
BAbS19_I05600	59.62	BruAb1_0596	identical
BAbS19_I05610	56.44	BruAb1_0597	identical
BAbS19_I05620	59.29	BruAb1_0598	identical
BAbS19_I05630	60.37	BruAb1_0599 # BruAb1_0598	identical
BAbS19_I05640	56.9	BruAb1_0600	identical
BAbS19_I05650	58.5	BruAb1_0601	identical
BAbS19_I05660	54.88	BruAb1_0602	identical
BAbS19_I05670	62.91	BruAb1_0603	identical
BAbS19_I05680	59.25	BruAb1_0604	identical
BAbS19_I05690	60.04	BruAb1_0605	identical
BAbS19_I05710	62.06	BruAb1_0607	identical
BAbS19_I05720	61.38	BruAb1_0608	identical
BAbS19_I05730	62.93	BruAb1_0609	identical
BAbS19_I05740	59.92	BruAb1_0610	identical
BAbS19_I05750	58.91	BruAb1_0611	identical
BAbS19_I05760	58.11	BruAb1_0612	identical
BAbS19_I05770	57.68	BruAb1_0613	identical
BAbS19_I05780	58.21	BruAb1_0614	identical
BAbS19_I05790	61.4	BruAb1_0615	identical
BAbS19_I05800	63.55	no match	identical
BAbS19_I05810	59.08	BruAb1_0617	identical
BAbS19_I05820	61.86	no match	identical
BAbS19_I05830	64.54	BruAb1_0619	identical
BAbS19_I05860	56.04	BruAb1_0621	identical
BAbS19_I05870	62.63	BruAb1_0622	identical
BAbS19_I05880	57.97	BruAb1_0623	identical
BAbS19_I05900	59.82	BruAb1_0625	identical
BAbS19_I05910	61.84	BruAb1_0626	identical
BAbS19_I05920	59.44	BruAb1_0627	identical
BAbS19_I05930	60.04	BruAb1_0628	identical
BAbS19_I05940	55.56	BruAb1_0629	identical
BAbS19_I05950	60.51	BruAb1_0630	identical
BAbS19_I05980	58.3	BruAb1_0633	identical
BAbS19_I05990	50.13	BruAb1_0634	identical
BAbS19_I06010	59.39	BruAb1_0636	identical
BAbS19_I06020	58.8	BruAb1_0637	identical
BAbS19_I06030	58.87	BruAb1_0638	identical
BAbS19_I06040	61.51	BruAb1_0639	identical
BAbS19_I06050	59.22	BruAb1_0640	identical
BAbS19_I06060	59.44	BruAb1_0641	identical
BAbS19_I06070	58.48	BruAb1_0642	identical
BAbS19_I06080	51.77	BruAb1_0644	identical
BAbS19_I06090	54.57	BruAb1_0645	identical
BAbS19_I06100	58.05	BruAb1_0646	identical
BAbS19_I06110	54.7	BruAb1_0647	identical
BAbS19_I06120	56.98	BruAb1_0648	identical
BAbS19_I06130	56.42	BruAb1_0649	identical
BAbS19_I06140	57.76	BruAb1_0651	identical
BAbS19_I06150	61.19	BruAb1_0652	identical
BAbS19_I06160	55.82	BruAb1_0653	identical
BAbS19_I06170	52.21	BruAb1_0654	identical
BAbS19_I06180	57.45	BruAb1_0655	identical
BAbS19_I06200	53.74	BruAb1_0658	identical
BAbS19_I06210	57.99	BruAb1_0660	identical
BAbS19_I06230	56.92	BruAb1_0663	identical
BAbS19_I06240	55.77	BruAb1_0664	identical
BAbS19_I06250	58.18	BruAb1_0665	identical
BAbS19_I06260	54.34	BruAb1_0666	identical
BAbS19_I06270	35.26	BruAb1_0667	identical
BAbS19_I06280	56.22	BruAb1_0668	identical
BAbS19_I06290	58.34	BruAb1_0669	identical
BAbS19_I06300	60.45	BruAb1_0670	identical
BAbS19_I06320	57.23	BruAb1_0672	identical
BAbS19_I06330	59.24	BruAb1_0673	identical
BAbS19_I06340	58.51	BruAb1_0674	identical
BAbS19_I06350	61.11	BruAb1_0675	identical
BAbS19_I06360	54.81	BruAb1_0676	identical
BAbS19_I06370	56.58	BruAb1_0677	identical
BAbS19_I06380	58.81	BruAb1_0678	identical
BAbS19_I06390	57.59	BruAb1_0680	identical
BAbS19_I06400	59.01	BruAb1_0681	identical
BAbS19_I06410	62.16	BruAb1_0682	identical
BAbS19_I06420	59.74	BruAb1_0683	identical
BAbS19_I06430	57.84	BruAb1_0684	identical
BAbS19_I06440	59.7	BruAb1_0685	identical
BAbS19_I06450	58.69	BruAb1_0686	identical
BAbS19_I06460	51.31	BruAb1_0687	identical
BAbS19_I06470	55.73	BruAb1_0688	identical
BAbS19_I06480	58.33	BruAb1_0689	identical
BAbS19_I06490	60.51	BruAb1_0690	identical
BAbS19_I06500	60	BruAb1_0691	identical
BAbS19_I06510	57.74	BruAb1_0692	identical
BAbS19_I06520	48.15	BruAb1_0693	identical
BAbS19_I06530	59.11	BruAb1_0694	identical
BAbS19_I06540	59.36	BruAb1_0698	identical
BAbS19_I06550	57.87	BruAb1_0699	identical
BAbS19_I06560	57.93	BruAb1_0700	identical
BAbS19_I06580	60.47	BruAb1_0702	identical
BAbS19_I06590	56.74	BruAb1_0703	identical
BAbS19_I06600	55.54	BruAb1_0704	identical
BAbS19_I06610	54.27	BruAb1_0705	identical
BAbS19_I06620	56	BruAb1_0706	identical
BAbS19_I06630	58.63	BruAb1_0708	identical
BAbS19_I06640	56.22	BruAb1_0709	identical
BAbS19_I06650	62.06	BruAb1_0710	identical
BAbS19_I06660	58.7	BruAb1_0711	identical
BAbS19_I06670	56.92	BruAb1_0712	identical
BAbS19_I06680	57.92	BruAb1_0713	identical
BAbS19_I06700	56.5	BruAb1_0715	identical
BAbS19_I06710	53.1	BruAb1_0716	identical
BAbS19_I06720	55.21	BruAb1_0717	identical
BAbS19_I06730	59.58	BruAb1_0718	identical
BAbS19_I06750	56.1	BruAb1_0720	identical
BAbS19_I06760	57.5	BruAb1_0721	identical
BAbS19_I06770	58.7	BruAb1_0722	identical
BAbS19_I06780	61.57	BruAb1_0723	identical
BAbS19_I06800	62.41	BruAb1_0725	identical
BAbS19_I06810	59.33	BruAb1_0726	identical
BAbS19_I06820	63.05	BruAb1_0727	identical
BAbS19_I06830	59.87	BruAb1_0728	identical
BAbS19_I06840	60.74	BruAb1_0729	identical
BAbS19_I06850	51.67	BruAb1_0730	identical
BAbS19_I06860	57.75	no match	identical
BAbS19_I06870	58.97	BruAb1_0732	identical
BAbS19_I06880	62.6	BruAb1_0733	identical
BAbS19_I06890	58.3	BruAb1_0734	identical
BAbS19_I06900	49.36	BruAb1_0735	identical
BAbS19_I06910	39.74	BruAb1_0736	identical
BAbS19_I06920	58.18	BruAb1_0737	identical
BAbS19_I06930	53.27	BruAb1_0738	identical
BAbS19_I06940	54.89	BruAb1_0739	identical
BAbS19_I06950	53.1	BruAb1_0740	identical
BAbS19_I06960	53.48	BruAb1_0741	identical
BAbS19_I06970	52.15	BruAb1_0742	identical
BAbS19_I06980	51.57	BruAb1_0743	identical
BAbS19_I06990	52.34	BruAb1_0746	identical
BAbS19_I07000	52.22	no match	identical
BAbS19_I07030	48.44	BruAb1_0749	identical
BAbS19_I07040	46.33	BruAb1_0750	identical
BAbS19_I07080	56.88	BruAb1_0752	identical
BAbS19_I07090	58.5	no match	identical
BAbS19_I07100	48.72	BruAb1_0755	identical
BAbS19_I07110	56.32	BruAb1_0756	identical
BAbS19_I07120	56.51	BruAb1_0757	identical
BAbS19_I07150	55.56	no match	identical
BAbS19_I07160	58.14	no match	identical
BAbS19_I07170	56.55	no match	identical
BAbS19_I07180	54.9	BruAb1_0762	identical
BAbS19_I07190	58.96	BruAb1_0763	identical
BAbS19_I07200	54.51	BruAb1_0764	identical
BAbS19_I07210	56.89	BruAb1_0765	identical
BAbS19_I07220	59	BruAb1_0766	identical
BAbS19_I07230	60.36	BruAb1_0767	identical
BAbS19_I07240	58.39	BruAb1_0768	identical
BAbS19_I07250	55.89	BruAb1_0769	identical
BAbS19_I07260	58.06	BruAb1_0771	identical
BAbS19_I07280	53.93	BruAb1_0773	identical
BAbS19_I07290	59.34	BruAb1_0774	identical
BAbS19_I07300	58.29	BruAb1_0775	identical
BAbS19_I07310	58.39	BruAb1_0776	identical
BAbS19_I07320	55.62	BruAb1_0777	identical
BAbS19_I07330	53.19	BruAb1_0778	identical
BAbS19_I07340	58.06	BruAb1_0779	identical
BAbS19_I07350	52.59	BruAb1_0780	identical
BAbS19_I07360	58.24	BruAb1_0781	identical
BAbS19_I07370	58.07	BruAb1_0782	identical
BAbS19_I07390	57.31	BruAb1_0784	identical
BAbS19_I07400	58.23	BruAb1_0785	identical
BAbS19_I07410	59.11	BruAb1_0786	identical
BAbS19_I07420	59.83	BruAb1_0787	identical
BAbS19_I07430	58.33	BruAb1_0788	identical
BAbS19_I07440	53.33	BruAb1_0789	identical
BAbS19_I07450	55.2	BruAb1_0790	identical
BAbS19_I07460	58.12	BruAb1_0791	identical
BAbS19_I07470	59.57	BruAb1_0792	identical
BAbS19_I07480	52.78	BruAb1_0793	identical
BAbS19_I07490	58.15	BruAb1_0794	identical
BAbS19_I07500	53.14	BruAb1_0795	identical
BAbS19_I07510	55.62	BruAb1_0796	identical
BAbS19_I07520	53.3	BruAb1_0798	identical
BAbS19_I07530	54.75	BruAb1_0799	identical
BAbS19_I07540	54.79	BruAb1_0800	identical
BAbS19_I07550	58.59	BruAb1_0801	identical
BAbS19_I07560	59.27	BruAb1_0802	identical
BAbS19_I07570	59.52	BruAb1_0803	identical
BAbS19_I07580	61.43	BruAb1_0804	identical
BAbS19_I07590	57.42	BruAb1_0805	identical
BAbS19_I07600	58.84	BruAb1_0806	identical
BAbS19_I07610	57.24	BruAb1_0807	identical
BAbS19_I07630	48.26	BruAb1_0813	identical
BAbS19_I07650	54	BruAb1_0815	identical
BAbS19_I07660	52.46	BruAb1_0816	identical
BAbS19_I07670	59.97	BruAb1_0817	identical
BAbS19_I07680	56.65	BruAb1_0818	identical
BAbS19_I07690	57.93	BruAb1_0819	identical
BAbS19_I07720	61.15	BruAb1_0822	identical
BAbS19_I07730	55.27	BruAb1_0823	identical
BAbS19_I07740	58.94	BruAb1_0824	identical
BAbS19_I07750	57.77	BruAb1_0825	identical
BAbS19_I07760	51.78	BruAb1_0826	identical
BAbS19_I07770	57.3	BruAb1_0827	identical
BAbS19_I07780	57.59	BruAb1_0828	identical
BAbS19_I07790	56.99	BruAb1_0829	identical
BAbS19_I07800	58.4	BruAb1_0830	identical
BAbS19_I07810	59.75	BruAb1_0831	identical
BAbS19_I07820	57.28	BruAb1_0832	identical
BAbS19_I07830	53.7	BruAb1_0833	identical
BAbS19_I07840	56.88	BruAb1_0836	identical
BAbS19_I07850	57.53	BruAb1_0837	identical
BAbS19_I07860	61.55	BruAb1_0838	identical
BAbS19_I07870	57.99	BruAb1_0839	identical
BAbS19_I07880	55.56	BruAb1_0840	identical
BAbS19_I07930	57.61	BruAb1_0843	identical
BAbS19_I07940	55.33	BruAb1_0844	identical
BAbS19_I07950	57.97	BruAb1_0845	identical
BAbS19_I07960	58.21	BruAb1_0846	identical
BAbS19_I07970	50.15	BruAb1_0848	identical
BAbS19_I07980	58.55	BruAb1_0849	identical
BAbS19_I07990	59.15	BruAb1_0850	identical
BAbS19_I08000	62.44	BruAb1_0851	identical
BAbS19_I08010	56.94	BruAb1_0852	identical
BAbS19_I08020	60.57	BruAb1_0853	identical
BAbS19_I08030	58.85	BruAb1_0854	identical
BAbS19_I08040	55.95	BruAb1_0855	identical
BAbS19_I08050	56.17	BruAb1_0856	identical
BAbS19_I08060	57.94	BruAb1_0857	identical
BAbS19_I08070	58.73	BruAb1_0858	identical
BAbS19_I08080	61.42	BruAb1_0860	identical
BAbS19_I08090	59.45	BruAb1_0861	identical
BAbS19_I08100	60.62	BruAb1_0862	identical
BAbS19_I08110	57.5	BruAb1_0863	identical
BAbS19_I08120	61.42	BruAb1_0864	identical
BAbS19_I08130	60.64	BruAb1_0865	identical
BAbS19_I08140	60.83	BruAb1_0866	identical
BAbS19_I08150	51.06	BruAb1_0867	identical
BAbS19_I08160	60.24	BruAb1_0868	identical
BAbS19_I08170	57.09	BruAb1_0869	identical
BAbS19_I08180	59.85	BruAb1_0870	identical
BAbS19_I08190	58.33	BruAb1_0871	identical
BAbS19_I08200	59.04	BruAb1_0872	identical
BAbS19_I08210	58.48	BruAb1_0873	identical
BAbS19_I08240	57.45	BruAb1_0876	identical
BAbS19_I08250	54.67	BruAb1_0877	identical
BAbS19_I08260	62.32	BruAb1_0878	identical
BAbS19_I08280	54.58	BruAb1_0880	identical
BAbS19_I08290	58.82	BruAb1_0881	identical
BAbS19_I08300	57.58	BruAb1_0883	identical
BAbS19_I08310	57.21	BruAb1_0884	identical
BAbS19_I08320	55.11	BruAb1_0885	identical
BAbS19_I08330	57.49	BruAb1_0886	identical
BAbS19_I08340	54.74	BruAb1_0887	identical
BAbS19_I08350	58.56	BruAb1_0888	identical
BAbS19_I08360	56.94	BruAb1_0889	identical
BAbS19_I08370	59.3	BruAb1_0890	identical
BAbS19_I08380	59.22	BruAb1_0891	identical
BAbS19_I08390	60.92	BruAb1_0892	identical
BAbS19_I08400	60.74	BruAb1_0893	identical
BAbS19_I08410	56.16	BruAb1_0894	identical
BAbS19_I08420	56.36	BruAb1_0895	identical
BAbS19_I08430	57.21	BruAb1_0896	identical
BAbS19_I08440	59.35	BruAb1_0897	identical
BAbS19_I08450	60.81	BruAb1_0898	identical
BAbS19_I08460	58.45	BruAb1_0899	identical
BAbS19_I08470	60.51	BruAb1_0900	identical
BAbS19_I08480	54.9	BruAb1_0901	identical
BAbS19_I08490	54.39	BruAb1_0902	identical
BAbS19_I08500	56.74	BruAb1_0903	identical
BAbS19_I08510	60.51	BruAb1_0904	identical
BAbS19_I08520	58.03	BruAb1_0905	identical
BAbS19_I08530	59.74	BruAb1_0906	identical
BAbS19_I08540	59.86	BruAb1_0907	identical
BAbS19_I08550	56.73	BruAb1_0908	identical
BAbS19_I08560	56.14	BruAb1_0909	identical
BAbS19_I08570	56.43	BruAb1_0910	identical
BAbS19_I08580	57.22	BruAb1_0911	identical
BAbS19_I08600	58.88	no match	identical
BAbS19_I08610	46.83	BruAb1_0914	identical
BAbS19_I08620	58.11	BruAb1_0915	identical
BAbS19_I08630	59.19	BruAb1_0916	identical
BAbS19_I08640	57.54	BruAb1_0917	identical
BAbS19_I08650	61.15	BruAb1_0918	identical
BAbS19_I08660	54.64	BruAb1_0919	identical
BAbS19_I08670	56.14	BruAb1_0920	identical
BAbS19_I08680	58.47	BruAb1_0921	identical
BAbS19_I08690	59.36	BruAb1_0922	identical
BAbS19_I08700	58.83	BruAb1_0923	identical
BAbS19_I08710	56.9	BruAb1_0925	identical
BAbS19_I08720	58.29	BruAb1_0926	identical
BAbS19_I08730	57.76	BruAb1_0927	identical
BAbS19_I08750	58.81	BruAb1_0928	identical
BAbS19_I08770	52.94	BruAb1_0930	identical
BAbS19_I08780	61.71	BruAb1_0931	identical
BAbS19_I08790	57	BruAb1_0932	identical
BAbS19_I08800	56.13	BruAb1_0933	identical
BAbS19_I08810	56.5	BruAb1_0934	identical
BAbS19_I08820	58.37	BruAb1_0935	identical
BAbS19_I08830	60.52	BruAb1_0936	identical
BAbS19_I08840	55.56	BruAb1_0937	identical
BAbS19_I08850	57.48	BruAb1_0938	identical
BAbS19_I08860	58.47	BruAb1_0939	identical
BAbS19_I08870	55.91	BruAb1_0940	identical
BAbS19_I08880	55.95	BruAb1_0941	identical
BAbS19_I08890	59.31	BruAb1_0942	identical
BAbS19_I08900	55.58	BruAb1_0943	identical
BAbS19_I08910	57.62	BruAb1_0944	identical
BAbS19_I08930	54.52	BruAb1_0946	identical
BAbS19_I08940	57.83	BruAb1_0947	identical
BAbS19_I08950	56.41	BruAb1_0948	identical
BAbS19_I08960	53.22	no match	identical
BAbS19_I08970	56.48	no match	identical
BAbS19_I08980	59.7	BruAb1_0951	identical
BAbS19_I08990	56.05	BruAb1_0953	identical
BAbS19_I09010	58.06	BruAb1_0955	identical
BAbS19_I09020	57.15	BruAb1_0957	identical
BAbS19_I09060	56.55	no match	identical
BAbS19_I09070	52.53	no match	identical
BAbS19_I09080	54.2	BruAb1_0963	identical
BAbS19_I09090	58.26	BruAb1_0964	identical
BAbS19_I09100	55.28	BruAb1_0965	identical
BAbS19_I09110	57.42	no match	identical
BAbS19_I09120	58.33	BruAb1_0967	identical
BAbS19_I09150	53.97	BruAb1_0970	identical
BAbS19_I09160	50.78	BruAb1_0972	identical
BAbS19_I09170	57.12	BruAb1_0973	identical
BAbS19_I09180	51.52	BruAb1_0974	identical
BAbS19_I09190	57.61	BruAb1_0975	identical
BAbS19_I09200	56.17	no match	identical
BAbS19_I09210	54.59	no match	identical
BAbS19_I09220	55.56	BruAb1_0980	identical
BAbS19_I09230	47.66	BruAb1_0981	identical
BAbS19_I09240	58.04	BruAb1_1097	identical
BAbS19_I09250	58.81	BruAb1_0983	identical
BAbS19_I09260	49.08	BruAb1_0984	identical
BAbS19_I09290	47.81	BruAb1_0986	identical
BAbS19_I09300	46.63	BruAb1_0987	identical
BAbS19_I09310	45	BruAb1_0988	identical
BAbS19_I09320	59.68	BruAb1_0990	identical
BAbS19_I09330	51.11	no match	identical
BAbS19_I09340	46.08	BruAb1_0993	identical
BAbS19_I09350	55.46	BruAb1_0995	identical
BAbS19_I09360	57.82	BruAb1_0996	identical
BAbS19_I09370	58.19	BruAb1_0997	identical
BAbS19_I09380	57.52	BruAb1_0998	identical
BAbS19_I09390	59.74	BruAb1_0999	identical
BAbS19_I09400	57.82	BruAb1_1001	identical
BAbS19_I09410	55.72	BruAb1_1002	identical
BAbS19_I09420	56.53	BruAb1_1003	identical
BAbS19_I09430	59.61	BruAb1_1004	identical
BAbS19_I09440	59.33	BruAb1_1005	identical
BAbS19_I09460	57.51	BruAb1_1007	identical
BAbS19_I09470	58.49	BruAb1_1008	identical
BAbS19_I09480	55.46	BruAb1_1009	identical
BAbS19_I09490	53.69	BruAb1_1010	identical
BAbS19_I09500	60.49	BruAb1_1011	identical
BAbS19_I09510	61.46	BruAb1_1012	identical
BAbS19_I09520	57.45	BruAb1_1013	identical
BAbS19_I09540	57.37	BruAb1_1015	identical
BAbS19_I09550	59.59	BruAb1_1016	identical
BAbS19_I09560	55.7	BruAb1_1017	identical
BAbS19_I09580	53.85	BruAb1_1019	identical
BAbS19_I09590	56.85	BruAb1_1020	identical
BAbS19_I09600	57.28	BruAb1_1021	identical
BAbS19_I09610	57.1	BruAb1_1021	identical
BAbS19_I09620	59.66	BruAb1_1022	identical
BAbS19_I09630	57.7	BruAb1_1023	identical
BAbS19_I09640	55.92	BruAb1_1024	identical
BAbS19_I09650	56.25	BruAb1_1025	identical
BAbS19_I09660	55.52	BruAb1_1026	identical
BAbS19_I09670	54.92	BruAb1_1027	identical
BAbS19_I09690	48.61	BruAb1_1030	identical
BAbS19_I09700	60.8	BruAb1_1031	identical
BAbS19_I09710	55.86	no match	identical
BAbS19_I09720	56.52	BruAb1_1033	identical
BAbS19_I09730	57.98	BruAb1_1034	identical
BAbS19_I09740	52.78	BruAb1_1035	identical
BAbS19_I09750	59.55	BruAb1_1036	identical
BAbS19_I09760	56.93	BruAb1_1037	identical
BAbS19_I09770	59.5	BruAb1_1038	identical
BAbS19_I09780	58.59	BruAb1_1039	identical
BAbS19_I09790	54.09	BruAb1_1040	identical
BAbS19_I09810	60.3	BruAb1_1043	identical
BAbS19_I09820	58.69	BruAb1_1044	identical
BAbS19_I09830	56.97	BruAb1_1045	identical
BAbS19_I09840	55.56	BruAb1_1046	identical
BAbS19_I09850	51.18	BruAb1_1047	identical
BAbS19_I09860	57.49	BruAb1_1048	identical
BAbS19_I09870	59.51	BruAb1_1050	identical
BAbS19_I09880	57.17	no match	identical
BAbS19_I09890	59.34	BruAb1_1052	identical
BAbS19_I09900	57.44	BruAb1_1053	identical
BAbS19_I09910	59	BruAb1_1054	identical
BAbS19_I09920	50.67	BruAb1_1055	identical
BAbS19_I09930	53.94	BruAb1_1056	identical
BAbS19_I09940	61.97	BruAb1_1057	identical
BAbS19_I09950	58.11	BruAb1_1058	identical
BAbS19_I09960	55.91	BruAb1_1059	identical
BAbS19_I09970	58.25	BruAb1_1060	identical
BAbS19_I09980	55.17	BruAb1_1061	identical
BAbS19_I09990	55.33	BruAb1_1062	identical
BAbS19_I10080	55.28	BruAb1_1069	identical
BAbS19_I10090	53.97	BruAb1_1071	identical
BAbS19_I10100	53.45	BruAb1_1072	identical
BAbS19_I10110	56.37	BruAb1_1073	identical
BAbS19_I10120	58.12	BruAb1_1074	identical
BAbS19_I10130	57.67	BruAb1_1075	identical
BAbS19_I10140	56.45	BruAb1_1076	identical
BAbS19_I10150	58.54	BruAb1_1077	identical
BAbS19_I10160	59.68	BruAb1_1078	identical
BAbS19_I10170	57.37	BruAb1_1079	identical
BAbS19_I10180	57.01	BruAb1_1080	identical
BAbS19_I10190	57.38	BruAb1_1081	identical
BAbS19_I10200	59.39	BruAb1_1082	identical
BAbS19_I10210	53.82	BruAb1_1083	identical
BAbS19_I10220	53.58	BruAb1_1084	identical
BAbS19_I10230	54.66	no match	identical
BAbS19_I10240	58.25	BruAb1_1087	identical
BAbS19_I10250	54.31	BruAb1_1089	identical
BAbS19_I10280	56.79	BruAb1_1091	identical
BAbS19_I10290	59.15	BruAb1_1092	identical
BAbS19_I10300	59.55	BruAb1_1093	identical
BAbS19_I10310	57.38	BruAb1_1094	identical
BAbS19_I10320	57.28	BruAb1_1095	identical
BAbS19_I10330	54.14	BruAb1_1096	identical
BAbS19_I10340	58.99	BruAb1_1097	identical
BAbS19_I10350	58.42	BruAb1_1098	identical
BAbS19_I10360	59.57	BruAb1_1099	identical
BAbS19_I10370	55.84	BruAb1_1100	identical
BAbS19_I10380	55.76	BruAb1_1101	identical
BAbS19_I10390	55	BruAb1_1102	identical
BAbS19_I10400	58.93	BruAb1_1103	identical
BAbS19_I10410	56.67	BruAb1_1104	identical
BAbS19_I10420	55.82	BruAb1_1105	identical
BAbS19_I10430	54.99	BruAb1_1106	identical
BAbS19_I10440	44.28	BruAb1_1107	identical
BAbS19_I10450	56.41	BruAb1_1108	identical
BAbS19_I10460	58.36	BruAb1_1110	identical
BAbS19_I10470	60.51	BruAb1_1111	identical
BAbS19_I10480	56.79	BruAb1_1112	identical
BAbS19_I10490	55	BruAb1_1113	identical
BAbS19_I10510	56.51	BruAb1_1115	identical
BAbS19_I10520	59.55	BruAb1_1116	identical
BAbS19_I10530	45.57	BruAb1_1117	identical
BAbS19_I10540	51.34	no match	identical
BAbS19_I10550	56.28	BruAb1_1120	identical
BAbS19_I10560	60.21	BruAb1_1121	identical
BAbS19_I10570	57.47	BruAb1_1122	identical
BAbS19_I10580	59.42	BruAb1_1123	identical
BAbS19_I10590	59.67	BruAb1_1124	identical
BAbS19_I10600	58.68	BruAb1_1125	identical
BAbS19_I10610	58.18	BruAb1_1126	identical
BAbS19_I10620	59.24	BruAb1_1127	identical
BAbS19_I10630	57.39	no match	identical
BAbS19_I10640	53.16	BruAb1_1129	identical
BAbS19_I10650	56.45	BruAb1_1130	identical
BAbS19_I10660	64.65	BruAb1_1131	identical
BAbS19_I10670	58.95	BruAb1_1132	identical
BAbS19_I10680	59.67	BruAb1_1133	identical
BAbS19_I10700	55.91	BruAb1_1135	identical
BAbS19_I10710	49.7	BruAb1_1136	identical
BAbS19_I10720	49.66	BruAb1_1137	identical
BAbS19_I10730	57.51	BruAb1_1138	identical
BAbS19_I10740	57.07	BruAb1_1139	identical
BAbS19_I10760	57.29	BruAb1_1142	identical
BAbS19_I10770	63.53	BruAb1_1143	identical
BAbS19_I10780	59.61	BruAb1_1144	identical
BAbS19_I10790	59.25	BruAb1_1145	identical
BAbS19_I10800	61.76	BruAb1_1146	identical
BAbS19_I10810	58.24	BruAb1_1147	identical
BAbS19_I10820	60.44	BruAb1_1148	identical
BAbS19_I10830	60.82	BruAb1_1149	identical
BAbS19_I10840	57.68	BruAb1_1150	identical
BAbS19_I10850	57.49	BruAb1_1151	identical
BAbS19_I10860	53.67	BruAb1_1152	identical
BAbS19_I10870	60.06	BruAb1_1153	identical
BAbS19_I10880	57.15	BruAb1_1154	identical
BAbS19_I10890	57.83	BruAb1_1155	identical
BAbS19_I10900	58.36	BruAb1_1156	identical
BAbS19_I10910	57.47	BruAb1_1157	identical
BAbS19_I10920	53.8	BruAb1_1158	identical
BAbS19_I10930	58.43	BruAb1_1159	identical
BAbS19_I10940	54.43	BruAb1_1160	identical
BAbS19_I10950	57.11	BruAb1_1162	identical
BAbS19_I10960	58.67	BruAb1_1163	identical
BAbS19_I10970	59.74	BruAb1_1164	identical
BAbS19_I10980	57.93	BruAb1_1165	identical
BAbS19_I10990	57.64	BruAb1_1166	identical
BAbS19_I11000	59.48	BruAb1_1167	identical
BAbS19_I11010	59.27	BruAb1_1168	identical
BAbS19_I11020	52.72	BruAb1_1169	identical
BAbS19_I11030	53.86	BruAb1_1170	identical
BAbS19_I11040	58.06	BruAb1_1171	identical
BAbS19_I11070	54.88	BruAb1_1173	identical
BAbS19_I11080	53.43	BruAb1_1174	identical
BAbS19_I11090	57.62	BruAb1_1175	identical
BAbS19_I11100	52.42	BruAb1_1176	identical
BAbS19_I11110	61.54	BruAb1_1178	identical
BAbS19_I11120	61.22	BruAb1_1179	identical
BAbS19_I11130	58.68	BruAb1_1180	identical
BAbS19_I11140	59.77	no match	identical
BAbS19_I11150	50.79	BruAb1_1182	identical
BAbS19_I11160	55.97	BruAb1_1183	identical
BAbS19_I11170	58.02	BruAb1_1184	identical
BAbS19_I11180	56.07	BruAb1_1185	identical
BAbS19_I11190	54.64	BruAb1_1186	identical
BAbS19_I11210	55.56	BruAb1_1188	identical
BAbS19_I11220	57.69	BruAb1_1189	identical
BAbS19_I11230	59.32	BruAb1_1190	identical
BAbS19_I11250	58.17	BruAb1_1192	identical
BAbS19_I11260	58.71	BruAb1_1193	identical
BAbS19_I11270	59.63	BruAb1_1194	identical
BAbS19_I11280	58.91	BruAb1_1195	identical
BAbS19_I11300	57.15	BruAb1_1197	identical
BAbS19_I11310	51.7	BruAb1_1198	identical
BAbS19_I11320	57.88	BruAb1_1199	identical
BAbS19_I11330	57.55	BruAb1_1200	identical
BAbS19_I11340	57.52	BruAb1_1201	identical
BAbS19_I11350	58.29	BruAb1_1202	identical
BAbS19_I11360	57.91	BruAb1_1203	identical
BAbS19_I11370	57.2	BruAb1_1204	identical
BAbS19_I11380	58.09	BruAb1_1205	identical
BAbS19_I11390	58.77	BruAb1_1206	identical
BAbS19_I11400	57	BruAb1_1207	identical
BAbS19_I11410	49.21	BruAb1_1208	identical
BAbS19_I11420	59.13	BruAb1_1209	identical
BAbS19_I11430	55.9	BruAb1_1210	identical
BAbS19_I11440	59.89	BruAb1_1211	identical
BAbS19_I11450	59.16	BruAb1_1212	identical
BAbS19_I11460	58.04	BruAb1_1213	identical
BAbS19_I11470	57.1	BruAb1_1214	identical
BAbS19_I11480	62.05	BruAb1_1215	identical
BAbS19_I11490	56.91	BruAb1_1216	identical
BAbS19_I11500	58.8	BruAb1_1217	identical
BAbS19_I11510	55.11	BruAb1_1218	identical
BAbS19_I11520	59.45	BruAb1_1219	identical
BAbS19_I11530	58.59	BruAb1_1220	identical
BAbS19_I11540	60.43	BruAb1_1221	identical
BAbS19_I11550	61.98	BruAb1_1222	identical
BAbS19_I11560	57.49	BruAb1_1223	identical
BAbS19_I11570	57.89	BruAb1_1224	identical
BAbS19_I11580	57.84	BruAb1_1225	identical
BAbS19_I11590	54.66	BruAb1_1226	identical
BAbS19_I11600	57.05	BruAb1_1227	identical
BAbS19_I11610	54.74	BruAb1_1228	identical
BAbS19_I11620	53.5	BruAb1_1229	identical
BAbS19_I11630	58.21	BruAb1_1230	identical
BAbS19_I11640	58.21	BruAb1_1231	identical
BAbS19_I11650	57.38	BruAb1_1232	identical
BAbS19_I11660	58.72	BruAb1_1233	identical
BAbS19_I11670	54.48	BruAb1_1234	identical
BAbS19_I11680	59.83	BruAb1_1235	identical
BAbS19_I11690	57.14	BruAb1_1236	identical
BAbS19_I11700	60.55	BruAb1_1237	identical
BAbS19_I11710	58.54	BruAb1_1238	identical
BAbS19_I11720	57.28	BruAb1_1239	identical
BAbS19_I11730	58.84	BruAb1_1240	identical
BAbS19_I11750	57.32	BruAb1_1242	identical
BAbS19_I11760	57.26	BruAb1_1243	identical
BAbS19_I11770	54.01	BruAb1_1246	identical
BAbS19_I11780	57.93	BruAb1_1247	identical
BAbS19_I11790	57.72	BruAb1_1248	identical
BAbS19_I11800	59.2	BruAb1_1249	identical
BAbS19_I11820	56.98	BruAb1_1251	identical
BAbS19_I11830	58.04	BruAb1_1252	identical
BAbS19_I11840	52.27	BruAb1_1253	identical
BAbS19_I11850	53.73	BruAb1_1254	identical
BAbS19_I11860	58.93	BruAb1_1255	identical
BAbS19_I11870	61.09	BruAb1_1257	identical
BAbS19_I11880	54.63	BruAb1_1258	identical
BAbS19_I11890	57.61	BruAb1_1259	identical
BAbS19_I11900	58.57	BruAb1_1261	identical
BAbS19_I11910	59.41	BruAb1_1262	identical
BAbS19_I11920	57.58	BruAb1_1263	identical
BAbS19_I11930	48.31	BruAb1_1264	identical
BAbS19_I11940	57.94	BruAb1_1265	identical
BAbS19_I11950	50.41	no match	identical
BAbS19_I11960	58.24	BruAb1_1266	identical
BAbS19_I11970	54.38	BruAb1_1267	identical
BAbS19_I11980	59.79	BruAb1_1268	identical
BAbS19_I11990	44.2	BruAb1_1269	identical
BAbS19_I12000	58.5	BruAb1_1270	identical
BAbS19_I12030	61.57	BruAb1_1272	identical
BAbS19_I12040	53.58	BruAb1_1273	identical
BAbS19_I12050	45.39	no match	identical
BAbS19_I12060	61.09	BruAb1_1274	identical
BAbS19_I12070	58.86	BruAb1_1275	identical
BAbS19_I12080	58.56	BruAb1_1276	identical
BAbS19_I12090	62.36	BruAb1_1277	identical
BAbS19_I12100	57.58	BruAb1_1278	identical
BAbS19_I12110	55.79	BruAb1_1279	identical
BAbS19_I12120	58.02	BruAb1_1282	identical
BAbS19_I12130	57.37	BruAb1_1283	identical
BAbS19_I12140	60.4	BruAb1_1284	identical
BAbS19_I12150	58.22	BruAb1_1285	identical
BAbS19_I12160	61.28	BruAb1_1286	identical
BAbS19_I12170	58.95	BruAb1_1287	identical
BAbS19_I12180	62.04	BruAb1_1288	identical
BAbS19_I12200	60.65	BruAb1_1290	identical
BAbS19_I12210	61.97	BruAb1_1291	identical
BAbS19_I12220	51.85	no match	identical
BAbS19_I12230	55.99	no match	identical
BAbS19_I12260	58.84	BruAb1_1294	identical
BAbS19_I12270	59.24	BruAb1_1295	identical
BAbS19_I12280	60.66	BruAb1_1296	identical
BAbS19_I12290	60.49	BruAb1_1297	identical
BAbS19_I12300	61.89	BruAb1_1298	identical
BAbS19_I12310	60.07	BruAb1_1299	identical
BAbS19_I12320	61.31	BruAb1_1300	identical
BAbS19_I12330	58.23	BruAb1_1301	identical
BAbS19_I12340	58.59	BruAb1_1302	identical
BAbS19_I12350	54.81	BruAb1_1303	identical
BAbS19_I12360	59.41	BruAb1_1304	identical
BAbS19_I12370	59.82	BruAb1_1305	identical
BAbS19_I12380	56.03	BruAb1_1306	identical
BAbS19_I12400	57.43	BruAb1_1308	identical
BAbS19_I12410	60.15	BruAb1_1309	identical
BAbS19_I12420	60.96	BruAb1_1310	identical
BAbS19_I12430	57.14	BruAb1_1311	identical
BAbS19_I12440	60.67	BruAb1_1312	identical
BAbS19_I12450	57.69	BruAb1_1314	identical
BAbS19_I12460	60.61	BruAb1_1315	identical
BAbS19_I12470	45.83	BruAb1_1316	identical
BAbS19_I12480	58.78	BruAb1_1318	identical
BAbS19_I12490	57.16	BruAb1_1319	identical
BAbS19_I12530	57.35	BruAb1_1322	identical
BAbS19_I12540	59.62	BruAb1_1323	identical
BAbS19_I12550	59.34	BruAb1_1324	identical
BAbS19_I12560	59.46	BruAb1_1325	identical
BAbS19_I12570	55.35	BruAb1_1326	identical
BAbS19_I12600	56.32	BruAb1_1328	identical
BAbS19_I12610	59.02	BruAb1_1329	identical
BAbS19_I12620	55.52	BruAb1_1330	identical
BAbS19_I12630	51.97	BruAb1_1331	identical
BAbS19_I12640	58.95	BruAb1_1332	identical
BAbS19_I12660	53.52	BruAb1_1334	identical
BAbS19_I12670	54.37	BruAb1_1335	identical
BAbS19_I12680	59.26	BruAb1_1336	identical
BAbS19_I12690	58.46	BruAb1_1337	identical
BAbS19_I12720	59.68	BruAb1_1340	identical
BAbS19_I12730	57.44	BruAb1_1341	identical
BAbS19_I12740	62.16	BruAb1_1342	identical
BAbS19_I12750	62.08	BruAb1_1343	identical
BAbS19_I12760	60.48	BruAb1_1344	identical
BAbS19_I12770	56.58	BruAb1_1345	identical
BAbS19_I12810	60.96	BruAb1_1349	identical
BAbS19_I12820	52.22	no match	identical
BAbS19_I12840	57.1	BruAb1_1353	identical
BAbS19_I12850	58.13	BruAb1_1354	identical
BAbS19_I12860	59.23	BruAb1_1355	identical
BAbS19_I12870	58.55	BruAb1_1356	identical
BAbS19_I12880	58.88	BruAb1_1357	identical
BAbS19_I12890	56.34	BruAb1_1358	identical
BAbS19_I12900	57.92	BruAb1_1359	identical
BAbS19_I12910	60.19	BruAb1_1360	identical
BAbS19_I12920	57.44	BruAb1_1361	identical
BAbS19_I12930	61.64	BruAb1_1362	identical
BAbS19_I12940	62.52	BruAb1_1363	identical
BAbS19_I12950	60.13	BruAb1_1364	identical
BAbS19_I12960	57.22	BruAb1_1365	identical
BAbS19_I12970	57.81	BruAb1_1366	identical
BAbS19_I12980	56.41	BruAb1_1367	identical
BAbS19_I13000	51.95	BruAb1_1369	identical
BAbS19_I13010	47.83	no match	identical
BAbS19_I13020	57.82	BruAb1_1370	identical
BAbS19_I13040	55.68	BruAb1_1372	identical
BAbS19_I13050	57.35	BruAb1_1373	identical
BAbS19_I13060	57.26	BruAb1_1374	identical
BAbS19_I13070	58.24	BruAb1_1376	identical
BAbS19_I13080	59.97	BruAb1_1377	identical
BAbS19_I13090	46.81	BruAb1_1378	identical
BAbS19_I13100	58.28	BruAb1_1379	identical
BAbS19_I13110	57.23	BruAb1_1380	identical
BAbS19_I13120	59.65	BruAb1_1381	identical
BAbS19_I13130	53.13	BruAb1_1382	identical
BAbS19_I13140	57.84	BruAb1_1383	identical
BAbS19_I13150	58.46	BruAb1_1384	identical
BAbS19_I13160	58.5	BruAb1_1385	identical
BAbS19_I13170	59.59	BruAb1_1386	identical
BAbS19_I13180	60.56	BruAb1_1387	identical
BAbS19_I13190	59.22	BruAb1_1388	identical
BAbS19_I13200	58.67	BruAb1_1389	identical
BAbS19_I13210	60.22	BruAb1_1390	identical
BAbS19_I13220	60.13	BruAb1_1391	identical
BAbS19_I13230	58.94	BruAb1_1392	identical
BAbS19_I13240	57.8	BruAb1_1393	identical
BAbS19_I13250	55.47	BruAb1_1394	identical
BAbS19_I13260	57.69	BruAb1_1395	identical
BAbS19_I13270	60.06	no match	identical
BAbS19_I13280	51.7	BruAb1_1397	identical
BAbS19_I13290	56.62	BruAb1_1398	identical
BAbS19_I13300	54.21	BruAb1_1399	identical
BAbS19_I13310	54.24	BruAb1_1400	identical
BAbS19_I13320	52.24	BruAb1_1401	identical
BAbS19_I13330	58.72	BruAb1_1402	identical
BAbS19_I13340	60.12	BruAb1_1403	identical
BAbS19_I13350	48.23	BruAb1_1404	identical
BAbS19_I13360	59.7	BruAb1_1405	identical
BAbS19_I13370	60.78	BruAb1_1406	identical
BAbS19_I13380	60.35	BruAb1_1407	identical
BAbS19_I13390	59.37	BruAb1_1408	identical
BAbS19_I13400	54.22	BruAb1_1409	identical
BAbS19_I13410	58.77	BruAb1_1410	identical
BAbS19_I13420	55.61	BruAb1_1411	identical
BAbS19_I13430	58.28	BruAb1_1412	identical
BAbS19_I13440	59.44	BruAb1_1413	identical
BAbS19_I13450	56.88	BruAb1_1414	identical
BAbS19_I13460	59.95	BruAb1_1415	identical
BAbS19_I13470	62.26	BruAb1_1416	identical
BAbS19_I13480	56.48	BruAb1_1417	identical
BAbS19_I13490	56.33	BruAb1_1419	identical
BAbS19_I13500	63.9	BruAb1_1420	identical
BAbS19_I13520	58.44	BruAb1_1422	identical
BAbS19_I13530	55.45	BruAb1_1423	identical
BAbS19_I13540	61.09	BruAb1_1424	identical
BAbS19_I13550	61.09	BruAb1_1425	identical
BAbS19_I13560	61.84	BruAb1_1426	identical
BAbS19_I13570	59.15	BruAb1_1427	identical
BAbS19_I13580	60.54	BruAb1_1428	identical
BAbS19_I13590	57.25	BruAb1_1429	identical
BAbS19_I13600	58.99	BruAb1_1430	identical
BAbS19_I13610	59.92	BruAb1_1431	identical
BAbS19_I13620	59.38	BruAb1_1432	identical
BAbS19_I13630	56.52	BruAb1_1433	identical
BAbS19_I13640	61.38	BruAb1_1434	identical
BAbS19_I13650	58.72	BruAb1_1436	identical
BAbS19_I13660	55.19	BruAb1_1438	identical
BAbS19_I13670	55.39	BruAb1_1439	identical
BAbS19_I13680	54.29	BruAb1_1440	identical
BAbS19_I13690	59.01	BruAb1_1441	identical
BAbS19_I13710	58.56	BruAb1_1443	identical
BAbS19_I13720	58.87	BruAb1_1444	identical
BAbS19_I13730	57.68	BruAb1_1445	identical
BAbS19_I13740	60.14	BruAb1_1446	identical
BAbS19_I13750	55.4	BruAb1_1447	identical
BAbS19_I13760	56.82	BruAb1_1448	identical
BAbS19_I13770	55.79	no match	identical
BAbS19_I13780	56.12	BruAb1_1451	identical
BAbS19_I13790	58.33	BruAb1_1452	identical
BAbS19_I13800	57.14	BruAb1_1453	identical
BAbS19_I13810	52.85	no match	identical
BAbS19_I13840	57.13	BruAb1_1456	identical
BAbS19_I13850	59.25	BruAb1_1457	identical
BAbS19_I13860	55.86	BruAb1_1458	identical
BAbS19_I13870	56.19	BruAb1_1459	identical
BAbS19_I13880	54.61	BruAb1_1460	identical
BAbS19_I13890	53.93	BruAb1_1461	identical
BAbS19_I13900	54.35	BruAb1_1463	identical
BAbS19_I13910	54.35	BruAb1_1464	identical
BAbS19_I13920	60.17	BruAb1_1467	identical
BAbS19_I13930	56.89	BruAb1_1468	identical
BAbS19_I13940	55.56	BruAb1_1469	identical
BAbS19_I13960	58.84	BruAb1_1471	identical
BAbS19_I13970	54.47	BruAb1_1472	identical
BAbS19_I13980	54.98	BruAb1_1473	identical
BAbS19_I14000	61.64	BruAb1_1475	identical
BAbS19_I14010	59.39	BruAb1_1476	identical
BAbS19_I14020	57.62	BruAb1_1477	identical
BAbS19_I14030	60.7	BruAb1_1478	identical
BAbS19_I14050	54.14	BruAb1_1480	identical
BAbS19_I14060	56.81	BruAb1_1481	identical
BAbS19_I14070	60.42	BruAb1_1482	identical
BAbS19_I14080	58.47	BruAb1_1484	identical
BAbS19_I14090	56.01	BruAb1_1485	identical
BAbS19_I14100	58.57	BruAb1_1486	identical
BAbS19_I14110	57.03	BruAb1_1487	identical
BAbS19_I14120	58.27	BruAb1_1488	identical
BAbS19_I14130	42.59	BruAb1_1490	identical
BAbS19_I14140	57.17	BruAb1_1491	identical
BAbS19_I14150	59.49	BruAb1_1492	identical
BAbS19_I14160	57.42	BruAb1_1493	identical
BAbS19_I14170	58.81	BruAb1_1495	identical
BAbS19_I14180	57.57	BruAb1_1496	identical
BAbS19_I14190	55.06	BruAb1_1497	identical
BAbS19_I14200	54.83	BruAb1_1498	identical
BAbS19_I14210	48.92	no match	identical
BAbS19_I14220	60.75	BruAb1_1499	identical
BAbS19_I14230	53.28	BruAb1_1500	identical
BAbS19_I14240	59.87	BruAb1_1501	identical
BAbS19_I14250	57.95	BruAb1_1502	identical
BAbS19_I14260	58.47	BruAb1_1503	identical
BAbS19_I14280	60.45	BruAb1_1505	identical
BAbS19_I14290	52.31	BruAb1_1506	identical
BAbS19_I14300	50	no match	identical
BAbS19_I14310	61.79	BruAb1_1507	identical
BAbS19_I14320	58.3	BruAb1_1508	identical
BAbS19_I14330	58.16	BruAb1_1509	identical
BAbS19_I14340	46.46	BruAb1_1510	identical
BAbS19_I14350	53.37	BruAb1_1511	identical
BAbS19_I14360	59.32	BruAb1_1512	identical
BAbS19_I14370	59.52	BruAb1_1513	identical
BAbS19_I14380	43.33	no match	identical
BAbS19_I14390	54.89	BruAb1_1514	identical
BAbS19_I14400	56.69	BruAb1_1515	identical
BAbS19_I14410	56.39	BruAb1_1516	identical
BAbS19_I14420	51.77	no match	identical
BAbS19_I14430	61.58	BruAb1_1517	identical
BAbS19_I14440	58.87	BruAb1_1518	identical
BAbS19_I14450	58.15	BruAb1_1519	identical
BAbS19_I14460	57.81	BruAb1_1520	identical
BAbS19_I14470	59.12	BruAb1_1521	identical
BAbS19_I14480	59.59	BruAb1_1522	identical
BAbS19_I14490	62.16	BruAb1_1523	identical
BAbS19_I14500	58.33	BruAb1_1524	identical
BAbS19_I14510	57.93	BruAb1_1525	identical
BAbS19_I14520	59.33	BruAb1_1526	identical
BAbS19_I14530	58.33	BruAb1_1527	identical
BAbS19_I14540	58.18	BruAb1_1528	identical
BAbS19_I14550	57.14	BruAb1_1529	identical
BAbS19_I14560	57.16	BruAb1_1530	identical
BAbS19_I14570	57.04	BruAb1_1531	identical
BAbS19_I14580	58.16	BruAb1_1532	identical
BAbS19_I14590	58.43	BruAb1_1533	identical
BAbS19_I14600	57.51	BruAb1_1534	identical
BAbS19_I14610	58.33	BruAb1_1535	identical
BAbS19_I14620	57.51	BruAb1_1536	identical
BAbS19_I14630	62.07	BruAb1_1538	identical
BAbS19_I14640	57.79	BruAb1_1539	identical
BAbS19_I14650	60.81	BruAb1_1540	identical
BAbS19_I14660	49.12	no match	identical
BAbS19_I14670	58.04	no match	identical
BAbS19_I14680	59.28	BruAb1_1542	identical
BAbS19_I14690	61.06	BruAb1_1543	identical
BAbS19_I14700	60.21	BruAb1_1544	identical
BAbS19_I14720	63.34	BruAb1_1546	identical
BAbS19_I14730	61.57	BruAb1_1547	identical
BAbS19_I14740	60.53	BruAb1_1548	identical
BAbS19_I14750	63.12	BruAb1_1549	identical
BAbS19_I14760	56.81	BruAb1_1550	identical
BAbS19_I14780	53.51	BruAb1_1552	identical
BAbS19_I14790	59.76	BruAb1_1553	identical
BAbS19_I14800	57.41	BruAb1_1555	identical
BAbS19_I14810	58.53	BruAb1_1557	identical
BAbS19_I14820	46.1	no match	identical
BAbS19_I14840	52.91	no match	identical
BAbS19_I14850	55.19	BruAb1_1559	identical
BAbS19_I14860	59.11	no match	identical
BAbS19_I14870	61.02	BruAb1_1561	identical
BAbS19_I14880	62.94	BruAb1_1562	identical
BAbS19_I14890	57.98	BruAb1_1563	identical
BAbS19_I14900	52.08	BruAb1_1564	identical
BAbS19_I14910	56.04	BruAb1_1566	identical
BAbS19_I14920	56.51	BruAb1_1567	identical
BAbS19_I14930	58.83	BruAb1_1568	identical
BAbS19_I14940	56.89	BruAb1_1569	identical
BAbS19_I14950	56.42	BruAb1_1570	identical
BAbS19_I14960	58.42	BruAb1_1571	identical
BAbS19_I14970	55.56	BruAb1_1572	identical
BAbS19_I15010	47.7	BruAb1_1576	identical
BAbS19_I15020	55.46	BruAb1_1577	identical
BAbS19_I15030	59.73	BruAb1_1578	identical
BAbS19_I15040	47.83	BruAb1_1579	identical
BAbS19_I15050	57.97	BruAb1_1580	identical
BAbS19_I15060	56.12	BruAb1_1581	identical
BAbS19_I15070	55.51	BruAb1_1582	identical
BAbS19_I15080	55.95	BruAb1_1583	identical
BAbS19_I15090	58.1	BruAb1_1585	identical
BAbS19_I15100	54.94	BruAb1_1586	identical
BAbS19_I15110	56.74	BruAb1_1587	identical
BAbS19_I15120	56.62	BruAb1_1588	identical
BAbS19_I15140	50.45	BruAb1_1592	identical
BAbS19_I15150	60.59	BruAb1_1593	identical
BAbS19_I15160	59.96	BruAb1_1595	identical
BAbS19_I15210	54.8	BruAb1_1599	identical
BAbS19_I15220	62.41	no match	identical
BAbS19_I15230	61.36	no match	identical
BAbS19_I15240	60.54	BruAb1_1601	identical
BAbS19_I15250	56.12	BruAb1_1602	identical
BAbS19_I15260	55.56	BruAb1_1603	identical
BAbS19_I15270	59.51	BruAb1_1604	identical
BAbS19_I15280	57.11	BruAb1_1605	identical
BAbS19_I15310	57.72	BruAb1_1607	identical
BAbS19_I15320	54.59	BruAb1_1608	identical
BAbS19_I15340	47.06	BruAb1_1611	identical
BAbS19_I15350	49.65	BruAb1_1612	identical
BAbS19_I15360	56.33	BruAb1_1613	identical
BAbS19_I15390	57.48	BruAb1_1615	identical
BAbS19_I15400	57.1	no match	identical
BAbS19_I15410	55.68	BruAb1_1617	identical
BAbS19_I15420	55.25	BruAb1_1618	identical
BAbS19_I15430	57.31	BruAb1_1619	identical
BAbS19_I15440	55.85	BruAb1_1620	identical
BAbS19_I15460	52.71	BruAb1_1623	identical
BAbS19_I15470	56.52	BruAb1_1624	identical
BAbS19_I15480	45.1	BruAb1_1625	identical
BAbS19_I15490	58.88	BruAb1_1627	identical
BAbS19_I15500	58.82	BruAb1_1628	identical
BAbS19_I15510	56.87	BruAb1_1629	identical
BAbS19_I15520	57.8	BruAb1_1630	identical
BAbS19_I15530	56.54	BruAb1_1631	identical
BAbS19_I15540	63.66	BruAb1_1634	identical
BAbS19_I15550	58.56	BruAb1_1635	identical
BAbS19_I15560	58.34	BruAb1_1636	identical
BAbS19_I15570	55.83	BruAb1_1637	identical
BAbS19_I15580	58.44	BruAb1_1638	identical
BAbS19_I15590	59.7	BruAb1_1639	identical
BAbS19_I15600	58.28	BruAb1_1640	identical
BAbS19_I15610	51.73	BruAb1_1641	identical
BAbS19_I15620	56.65	BruAb1_1642	identical
BAbS19_I15630	48.48	BruAb1_1643	identical
BAbS19_I15640	56.23	BruAb1_1644	identical
BAbS19_I15650	60.56	BruAb1_1645	identical
BAbS19_I15660	56.96	BruAb1_1646	identical
BAbS19_I15670	57.87	BruAb1_1647	identical
BAbS19_I15680	57.63	BruAb1_1648	identical
BAbS19_I15690	57.3	BruAb1_1649	identical
BAbS19_I15700	57.86	BruAb1_1651	identical
BAbS19_I15710	63.64	BruAb1_1653	identical
BAbS19_I15720	60.2	BruAb1_1654	identical
BAbS19_I15730	61.74	BruAb1_1655	identical
BAbS19_I15740	54.88	BruAb1_1656	identical
BAbS19_I15750	58.93	no match	identical
BAbS19_I15760	59.92	no match	identical
BAbS19_I15780	61.18	BruAb1_1660	identical
BAbS19_I15790	56.48	BruAb1_1661	identical
BAbS19_I15800	53.24	BruAb1_1662	identical
BAbS19_I15810	60.66	BruAb1_1663	identical
BAbS19_I15820	59.35	BruAb1_1664	identical
BAbS19_I15830	59.87	BruAb1_1665	identical
BAbS19_I15840	60.52	BruAb1_1666	identical
BAbS19_I15850	54.63	BruAb1_1667	identical
BAbS19_I15860	59.25	BruAb1_1668	identical
BAbS19_I15880	57.37	BruAb1_1670	identical
BAbS19_I15890	58.67	BruAb1_1672	identical
BAbS19_I15900	59.14	BruAb1_1673	identical
BAbS19_I15910	56	BruAb1_1674	identical
BAbS19_I15920	58.12	BruAb1_1675	identical
BAbS19_I15930	58.24	BruAb1_1676	identical
BAbS19_I15940	61.1	BruAb1_1677	identical
BAbS19_I15950	60	BruAb1_1678	identical
BAbS19_I15960	62.52	BruAb1_1680	identical
BAbS19_I15970	59.08	BruAb1_1682	identical
BAbS19_I15980	61.09	BruAb1_1683	identical
BAbS19_I15990	54.97	BruAb1_1684	identical
BAbS19_I16000	59.07	BruAb1_1685	identical
BAbS19_I16010	56.44	BruAb1_1686	identical
BAbS19_I16020	61.58	BruAb1_1687	identical
BAbS19_I16030	61.33	BruAb1_1688	identical
BAbS19_I16040	59.77	BruAb1_1689	identical
BAbS19_I16050	59.31	BruAb1_1690	identical
BAbS19_I16060	58.35	BruAb1_1691	identical
BAbS19_I16070	61.71	BruAb1_1692	identical
BAbS19_I16080	62.01	BruAb1_1693	identical
BAbS19_I16090	56.51	BruAb1_1695	identical
BAbS19_I16100	61.74	BruAb1_1696	identical
BAbS19_I16110	42.34	BruAb1_1697	identical
BAbS19_I16120	60.86	BruAb1_1698	identical
BAbS19_I16130	59.59	BruAb1_1699	identical
BAbS19_I16140	59.48	BruAb1_1700	identical
BAbS19_I16150	59.01	BruAb1_1701	identical
BAbS19_I16160	57.3	BruAb1_1702	identical
BAbS19_I16170	64.07	BruAb1_1703	identical
BAbS19_I16180	62.67	BruAb1_1704	identical
BAbS19_I16190	59.21	BruAb1_1705	identical
BAbS19_I16200	56.32	BruAb1_1706	identical
BAbS19_I16210	58.79	BruAb1_1707	identical
BAbS19_I16220	62.14	BruAb1_1708	identical
BAbS19_I16230	59.02	BruAb1_1709	identical
BAbS19_I16240	57.18	BruAb1_1710	identical
BAbS19_I16250	60.14	BruAb1_1712	identical
BAbS19_I16260	58.53	BruAb1_1713	identical
BAbS19_I16270	60.29	BruAb1_1714	identical
BAbS19_I16280	56.97	BruAb1_1715	identical
BAbS19_I16300	58.25	BruAb1_1717 # BruAb1_1716	identical
BAbS19_I16310	54.3	BruAb1_1718	identical
BAbS19_I16330	39.81	BruAb1_1720	identical
BAbS19_I16340	61.03	BruAb1_1721	identical
BAbS19_I16350	59.13	BruAb1_1722	identical
BAbS19_I16360	61.59	BruAb1_1723	identical
BAbS19_I16370	56.77	BruAb1_1724	identical
BAbS19_I16400	48.33	BruAb1_1726	identical
BAbS19_I16410	49.51	BruAb1_1728	identical
BAbS19_I16420	62.78	BruAb1_1729	identical
BAbS19_I16430	60.06	BruAb1_1730	identical
BAbS19_I16440	57.94	BruAb1_1731	identical
BAbS19_I16450	57.67	BruAb1_1732	identical
BAbS19_I16460	59.22	BruAb1_1733	identical
BAbS19_I16470	53.46	BruAb1_1734	identical
BAbS19_I16490	50.19	BruAb1_1737	identical
BAbS19_I16500	59.74	BruAb1_1738	identical
BAbS19_I16510	60.35	BruAb1_1740	identical
BAbS19_I16520	56.16	BruAb1_1741	identical
BAbS19_I16530	55.82	BruAb1_1742	identical
BAbS19_I16540	60.74	BruAb1_1743	identical
BAbS19_I16550	60.19	BruAb1_1744	identical
BAbS19_I16560	61.34	BruAb1_1746	identical
BAbS19_I16570	57.75	BruAb1_1747	identical
BAbS19_I16580	58.85	BruAb1_1748	identical
BAbS19_I16590	48.04	BruAb1_1749	identical
BAbS19_I16600	55.38	BruAb1_1750	identical
BAbS19_I16610	55.75	BruAb1_1751	identical
BAbS19_I16620	50.94	BruAb1_1752	identical
BAbS19_I16630	61.94	BruAb1_1753	identical
BAbS19_I16640	61.58	BruAb1_1754	identical
BAbS19_I16650	62.03	BruAb1_1756	identical
BAbS19_I16660	52.38	BruAb1_1756	identical
BAbS19_I16670	62.04	BruAb1_1757	identical
BAbS19_I16680	54.44	BruAb1_1758	identical
BAbS19_I16690	56.39	BruAb1_1759	identical
BAbS19_I16700	63.44	BruAb1_1760	identical
BAbS19_I16710	60.17	BruAb1_1761	identical
BAbS19_I16720	57.2	BruAb1_1762	identical
BAbS19_I16730	58.76	BruAb1_1763	identical
BAbS19_I16740	58.79	BruAb1_1764	identical
BAbS19_I16750	56.36	BruAb1_1765	identical
BAbS19_I16760	55.11	BruAb1_1767	identical
BAbS19_I16770	54.2	BruAb1_1768	identical
BAbS19_I16780	57.43	BruAb1_1769	identical
BAbS19_I16790	58.3	no match	identical
BAbS19_I16800	57.97	BruAb1_1771	identical
BAbS19_I16810	57.25	BruAb1_1772	identical
BAbS19_I16820	58.98	BruAb1_1773	identical
BAbS19_I16840	63.22	BruAb1_1775	identical
BAbS19_I16850	57.31	BruAb1_1776	identical
BAbS19_I16860	49.02	BruAb1_1777	identical
BAbS19_I16870	57.84	BruAb1_1778	identical
BAbS19_I16880	61.62	BruAb1_1779	identical
BAbS19_I16890	56.66	BruAb1_1780	identical
BAbS19_I16900	59.61	BruAb1_1781	identical
BAbS19_I16910	58.29	BruAb1_1782	identical
BAbS19_I16920	58.94	BruAb1_1783	identical
BAbS19_I16940	56.57	BruAb1_1785	identical
BAbS19_I16950	59.11	BruAb1_1786	identical
BAbS19_I16970	61.38	BruAb1_1788	identical
BAbS19_I16980	56.87	BruAb1_1789	identical
BAbS19_I16990	54.17	BruAb1_1790	identical
BAbS19_I17000	59.25	BruAb1_1791	identical
BAbS19_I17010	60.73	BruAb1_1792	identical
BAbS19_I17020	60.33	BruAb1_1793	identical
BAbS19_I17030	62.8	BruAb1_1794	identical
BAbS19_I17040	61.68	BruAb1_1795	identical
BAbS19_I17050	61.47	BruAb1_1796	identical
BAbS19_I17060	55.28	no match	identical
BAbS19_I17070	58.35	no match	identical
BAbS19_I17080	59.71	BruAb1_1798	identical
BAbS19_I17090	58.1	BruAb1_1799	identical
BAbS19_I17100	58.9	BruAb1_1800	identical
BAbS19_I17110	55.93	BruAb1_1801	identical
BAbS19_I17120	50.35	BruAb1_1802	identical
BAbS19_I17130	62.22	BruAb1_1803	identical
BAbS19_I17140	58.41	BruAb1_1804	identical
BAbS19_I17150	60.18	BruAb1_1805	identical
BAbS19_I17160	59.9	BruAb1_1807	identical
BAbS19_I17180	61.87	BruAb1_1809	identical
BAbS19_I17190	60.31	BruAb1_1810	identical
BAbS19_I17200	60.32	BruAb1_1811	identical
BAbS19_I17210	61.92	BruAb1_1812	identical
BAbS19_I17220	60.16	BruAb1_1813	identical
BAbS19_I17230	58.82	BruAb1_1814	identical
BAbS19_I17240	60.15	BruAb1_1815	identical
BAbS19_I17250	58.92	BruAb1_1816	identical
BAbS19_I17260	59.48	BruAb1_1817	identical
BAbS19_I17270	57.11	BruAb1_1818	identical
BAbS19_I17280	62.75	BruAb1_1819	identical
BAbS19_I17290	56.99	BruAb1_1820	identical
BAbS19_I17300	59.11	BruAb1_1821	identical
BAbS19_I17320	60.16	BruAb1_1823	identical
BAbS19_I17330	59.36	BruAb1_1824	identical
BAbS19_I17340	51.55	BruAb1_1825	identical
BAbS19_I17350	57.17	BruAb1_1826	identical
BAbS19_I17360	57.6	BruAb1_1827	identical
BAbS19_I17370	57.78	BruAb1_1828	identical
BAbS19_I17380	61.07	BruAb1_1829	identical
BAbS19_I17390	49.77	BruAb1_1830	identical
BAbS19_I17400	52.74	BruAb1_1831	identical
BAbS19_I17410	51.85	BruAb1_1832	identical
BAbS19_I17430	48.03	BruAb1_1835	identical
BAbS19_I17440	50.35	BruAb1_1836	identical
BAbS19_I17450	50.22	BruAb1_1837	identical
BAbS19_I17460	45.1	BruAb1_1625	identical
BAbS19_I17480	58.86	BruAb1_1841 # BruAb1_1842	identical
BAbS19_I17490	58.78	BruAb1_1843	identical
BAbS19_I17500	62.85	BruAb1_1844	identical
BAbS19_I17510	58.11	BruAb1_1847	identical
BAbS19_I17520	60.09	BruAb1_1848	identical
BAbS19_I17530	60.37	BruAb1_1849	identical
BAbS19_I17540	59.28	BruAb1_1850	identical
BAbS19_I17550	59.97	no match	identical
BAbS19_I17560	59.18	BruAb1_1852	identical
BAbS19_I17570	55.87	BruAb1_1853	identical
BAbS19_I17580	59.77	BruAb1_1854	identical
BAbS19_I17590	56.55	BruAb1_1855	identical
BAbS19_I17600	45	no match	identical
BAbS19_I17610	61.72	BruAb1_1856	identical
BAbS19_I17620	62.53	BruAb1_1857	identical
BAbS19_I17630	59.89	BruAb1_1858	identical
BAbS19_I17640	63.41	no match	identical
BAbS19_I17650	51.11	no match	identical
BAbS19_I17660	62.09	BruAb1_1861	identical
BAbS19_I17670	62.09	BruAb1_1862	identical
BAbS19_I17680	58.76	BruAb1_1863	identical
BAbS19_I17690	62.65	BruAb1_1864	identical
BAbS19_I17700	63.52	BruAb1_1865	identical
BAbS19_I17720	60.48	BruAb1_1867	identical
BAbS19_I17730	58.04	BruAb1_1868	identical
BAbS19_I17740	58.9	BruAb1_1869	identical
BAbS19_I17750	61.54	BruAb1_1870	identical
BAbS19_I17760	61.91	BruAb1_1871	identical
BAbS19_I17780	58.99	BruAb1_1873	identical
BAbS19_I17790	59.22	BruAb1_1874	identical
BAbS19_I17800	62.41	BruAb1_1875	identical
BAbS19_I17810	56.18	BruAb1_1876	identical
BAbS19_I17820	57.05	BruAb1_1877	identical
BAbS19_I17830	61.73	BruAb1_1878	identical
BAbS19_I17840	54.29	BruAb1_1879	identical
BAbS19_I17850	59.4	BruAb1_1880	identical
BAbS19_I17860	57.08	BruAb1_1881	identical
BAbS19_I17870	60.43	BruAb1_1882	identical
BAbS19_I17880	58.68	BruAb1_1883	identical
BAbS19_I17890	57.24	no match	identical
BAbS19_I17900	60.32	no match	identical
BAbS19_I17910	59.12	BruAb1_1886	identical
BAbS19_I17920	59.23	BruAb1_1887	identical
BAbS19_I17930	55.26	BruAb1_1888	identical
BAbS19_I17940	59.16	BruAb1_1889	identical
BAbS19_I17950	61.5	BruAb1_1890	identical
BAbS19_I17970	62.76	BruAb1_1892	identical
BAbS19_I17980	56.49	BruAb1_1893	identical
BAbS19_I17990	58.4	BruAb1_1894	identical
BAbS19_I18000	53.96	BruAb1_1895	identical
BAbS19_I18010	55.56	BruAb1_1896	identical
BAbS19_I18020	59.66	BruAb1_1897	identical
BAbS19_I18030	61.45	BruAb1_1898	identical
BAbS19_I18040	59.34	BruAb1_1899	identical
BAbS19_I18050	58.77	BruAb1_1900	identical
BAbS19_I18060	60.58	BruAb1_1901	identical
BAbS19_I18070	57.64	BruAb1_1902	identical
BAbS19_I18080	61.37	BruAb1_1903	identical
BAbS19_I18090	57.82	BruAb1_1905	identical
BAbS19_I18100	63.48	BruAb1_1906	identical
BAbS19_I18110	50.98	BruAb1_1907	identical
BAbS19_I18120	63.27	BruAb1_1908	identical
BAbS19_I18130	60.12	BruAb1_1909	identical
BAbS19_I18140	60.87	BruAb1_1910	identical
BAbS19_I18150	56.26	BruAb1_1911	identical
BAbS19_I18160	58.24	BruAb1_1912	identical
BAbS19_I18170	56.14	no match	identical
BAbS19_I18180	56.21	BruAb1_1914	identical
BAbS19_I18190	59.71	BruAb1_1915	identical
BAbS19_I18200	60.15	BruAb1_1916	identical
BAbS19_I18210	60.95	BruAb1_1917	identical
BAbS19_I18220	52.78	BruAb1_1918	identical
BAbS19_I18230	58.03	BruAb1_1919	identical
BAbS19_I18240	58.58	BruAb1_1921	identical
BAbS19_I18250	46.1	BruAb1_1922	identical
BAbS19_I18260	59.05	BruAb1_1923	identical
BAbS19_I18270	55.67	no match	identical
BAbS19_I18280	55.69	no match	identical
BAbS19_I18290	46.08	BruAb1_1925	identical
BAbS19_I18300	59.04	BruAb1_1927	identical
BAbS19_I18310	42.47	BruAb1_1928	identical
BAbS19_I18320	58.04	BruAb1_1929	identical
BAbS19_I18330	59.61	no match	identical
BAbS19_I18340	58.09	BruAb1_1931	identical
BAbS19_I18350	59.68	BruAb1_1932	identical
BAbS19_I18370	58.4	BruAb1_1934	identical
BAbS19_I18380	57.41	BruAb1_1935	identical
BAbS19_I18390	58.86	BruAb1_1936	identical
BAbS19_I18400	51.9	BruAb1_1937	identical
BAbS19_I18410	56.04	no match	identical
BAbS19_I18420	54.13	BruAb1_1939	identical
BAbS19_I18430	56.21	BruAb1_1940	identical
BAbS19_I18440	58.96	BruAb1_1941	identical
BAbS19_I18450	57.78	BruAb1_1942	identical
BAbS19_I18460	57.14	no match	identical
BAbS19_I18470	58.11	no match	identical
BAbS19_I18480	57.31	BruAb1_1945	identical
BAbS19_I18490	60.65	BruAb1_1946	identical
BAbS19_I18500	58.1	BruAb1_1947	identical
BAbS19_I18510	59.37	BruAb1_1948	identical
BAbS19_I18520	56.28	BruAb1_1949	identical
BAbS19_I18530	57.66	BruAb1_1950	identical
BAbS19_I18540	60.71	BruAb1_1951	identical
BAbS19_I18550	54.9	BruAb1_1952	identical
BAbS19_I18560	60.02	BruAb1_1953	identical
BAbS19_I18570	56.68	BruAb1_1954	identical
BAbS19_I18580	60.7	BruAb1_1955	identical
BAbS19_I18590	58.72	BruAb1_1956	identical
BAbS19_I18600	59.53	BruAb1_1957	identical
BAbS19_I18610	58.2	BruAb1_1958	identical
BAbS19_I18620	61.06	BruAb1_1959	identical
BAbS19_I18630	61.07	BruAb1_1960	identical
BAbS19_I18640	55.68	BruAb1_1961	identical
BAbS19_I18650	62.95	BruAb1_1962	identical
BAbS19_I18660	59.17	BruAb1_1963	identical
BAbS19_I18670	60.66	BruAb1_1964	identical
BAbS19_I18680	57.75	BruAb1_1965	identical
BAbS19_I18690	57.93	BruAb1_1966	identical
BAbS19_I18700	54.02	BruAb1_1967	identical
BAbS19_I18710	55.18	BruAb1_1968	identical
BAbS19_I18720	59.58	BruAb1_1969	identical
BAbS19_I18730	54.49	BruAb1_1970	identical
BAbS19_I18740	60.88	BruAb1_1971	identical
BAbS19_I18750	60.15	BruAb1_1972	identical
BAbS19_I18760	54.58	BruAb1_1974	identical
BAbS19_I18770	58.52	BruAb1_1976	identical
BAbS19_I18780	54.89	BruAb1_1978	identical
BAbS19_I18790	57.24	BruAb1_1979	identical
BAbS19_I18800	61.9	BruAb1_1980	identical
BAbS19_I18810	55.99	BruAb1_1981	identical
BAbS19_I18820	61.17	BruAb1_1982	identical
BAbS19_I18840	43.33	BruAb1_1985	identical
BAbS19_I18850	43.42	BruAb1_1987	identical
BAbS19_I18860	51.16	no match	identical
BAbS19_I18880	58.63	BruAb1_1989	identical
BAbS19_I18890	59.52	BruAb1_1990	identical
BAbS19_I18900	55.16	BruAb1_1991	identical
BAbS19_I18910	58.87	BruAb1_1992	identical
BAbS19_I18930	44.54	BruAb1_1994	identical
BAbS19_I18940	41.25	BruAb1_1995	identical
BAbS19_I18960	57.75	BruAb1_1997	identical
BAbS19_I18970	56.83	BruAb1_1999	identical
BAbS19_I18980	57.78	BruAb1_2001	identical
BAbS19_I18990	59.4	BruAb1_2002	identical
BAbS19_I19000	60.25	BruAb1_2003	identical
BAbS19_I19010	58.21	BruAb1_2004	identical
BAbS19_I19020	55.91	BruAb1_2005	identical
BAbS19_I19030	59.63	BruAb1_2006	identical
BAbS19_I19040	59.54	BruAb1_2007	identical
BAbS19_I19050	58.5	BruAb1_2008	identical
BAbS19_I19060	54.79	BruAb1_2009	identical
BAbS19_I19070	59.59	BruAb1_2010	identical
BAbS19_I19080	60.83	BruAb1_2011	identical
BAbS19_I19090	59.54	BruAb1_2012	identical
BAbS19_I19100	59.08	BruAb1_2014	identical
BAbS19_I19110	50.57	BruAb1_2015	identical
BAbS19_I19120	44.44	BruAb1_2016	identical
BAbS19_I19130	58.59	BruAb1_2017	identical
BAbS19_I19140	60.39	BruAb1_2018	identical
BAbS19_I19150	59.12	BruAb1_2019	identical
BAbS19_I19160	59.93	BruAb1_2020	identical
BAbS19_I19170	61	BruAb1_2021	identical
BAbS19_I19180	57.6	no match	identical
BAbS19_I19190	59.78	BruAb1_2023	identical
BAbS19_I19200	58.92	BruAb1_2024	identical
BAbS19_I19210	58.8	BruAb1_2025	identical
BAbS19_I19230	60.35	BruAb1_2028	identical
BAbS19_I19240	58.64	BruAb1_2030	identical
BAbS19_I19250	59.5	BruAb1_2031	identical
BAbS19_I19260	59.96	BruAb1_2032	identical
BAbS19_I19270	56.35	BruAb1_2033	identical
BAbS19_I19280	54.14	BruAb1_2034	identical
BAbS19_I19290	54.52	BruAb1_2035	identical
BAbS19_I19300	56.78	BruAb1_2036	identical
BAbS19_I19310	52.97	BruAb1_2037	identical
BAbS19_I19320	54.87	BruAb1_2038	identical
BAbS19_I19330	55.21	BruAb1_2039	identical
BAbS19_I19340	53.82	BruAb1_2040	identical
BAbS19_I19350	55.65	BruAb1_2041	identical
BAbS19_I19360	55.71	BruAb1_2042	identical
BAbS19_I19370	54.67	BruAb1_2043	identical
BAbS19_I19380	58.39	BruAb1_2044	identical
BAbS19_I19390	57.21	BruAb1_2045	identical
BAbS19_I19410	56.91	BruAb1_2047	identical
BAbS19_I19420	59.64	BruAb1_2048	identical
BAbS19_I19440	60.2	BruAb1_2050	identical
BAbS19_I19450	63.18	BruAb1_2051	identical
BAbS19_I19460	58.01	BruAb1_2052	identical
BAbS19_I19470	56.47	BruAb1_2053	identical
BAbS19_I19480	59.77	BruAb1_2054	identical
BAbS19_I19490	59.46	BruAb1_2055	identical
BAbS19_I19500	59.77	BruAb1_2056	identical
BAbS19_I19510	59.61	BruAb1_2057	identical
BAbS19_I19520	58.06	BruAb1_2058	identical
BAbS19_I19530	59.7	BruAb1_2059	identical
BAbS19_I19540	60.31	BruAb1_2060	identical
BAbS19_I19550	62.04	BruAb1_2061	identical
BAbS19_I19560	57.48	BruAb1_2062	identical
BAbS19_I19570	59.36	BruAb1_2063	identical
BAbS19_I19580	59.69	no match	identical
BAbS19_I19590	58.33	BruAb1_2065	identical
BAbS19_I19600	59.58	BruAb1_2066	identical
BAbS19_I19610	60.21	BruAb1_2067	identical
BAbS19_I19620	55.22	BruAb1_2069	identical
BAbS19_I19630	59.68	BruAb1_2070	identical
BAbS19_I19640	58.24	BruAb1_2072	identical
BAbS19_I19660	59.27	BruAb1_2075	identical
BAbS19_I19670	59.31	BruAb1_2076	identical
BAbS19_I19680	62.93	BruAb1_2077	identical
BAbS19_I19690	61.42	BruAb1_2078	identical
BAbS19_I19700	58.33	BruAb1_2080	identical
BAbS19_I19710	59.89	BruAb1_2081	identical
BAbS19_I19720	57.28	BruAb1_2082	identical
BAbS19_I19730	58.81	BruAb1_2083	identical
BAbS19_I19740	62.61	BruAb1_2084	identical
BAbS19_I19750	60.2	BruAb1_2085	identical
BAbS19_I19760	58.59	BruAb1_2086	identical
BAbS19_I19770	57.7	BruAb1_2087	identical
BAbS19_I19780	57.06	BruAb1_2088	identical
BAbS19_I19790	60.67	no match	identical
BAbS19_I19800	55.56	no match	identical
BAbS19_I19810	63.45	no match	identical
BAbS19_I19820	60.23	BruAb1_2091	identical
BAbS19_I19830	56.22	BruAb1_2092	identical
BAbS19_I19840	54.63	BruAb1_2093	identical
BAbS19_I19850	57.71	BruAb1_2094	identical
BAbS19_I19860	57.78	BruAb1_2095	identical
BAbS19_I19870	58.13	BruAb1_2096	identical
BAbS19_I19880	59.19	BruAb1_2097	identical
BAbS19_I19890	60.37	BruAb1_2098	identical
BAbS19_I19900	57.85	BruAb1_2099	identical
BAbS19_I19910	58.41	BruAb1_2100	identical
BAbS19_I19920	59.61	BruAb1_2101	identical
BAbS19_I19930	56.17	BruAb1_2102	identical
BAbS19_I19940	60.11	BruAb1_2103	identical
BAbS19_I19950	58.68	BruAb1_2104	identical
BAbS19_I19960	58.73	BruAb1_2105	identical
BAbS19_I19970	58.68	BruAb1_2106	identical
BAbS19_I19980	61.75	no match	identical
BAbS19_I20000	61.06	BruAb1_2110	identical
BAbS19_I20010	60.19	BruAb1_2112	identical
BAbS19_I20020	56.73	BruAb1_2113	identical
BAbS19_I20030	60.3	BruAb1_2114	identical
BAbS19_I20040	59.88	BruAb1_2115	identical
BAbS19_I20050	60.08	BruAb1_2116	identical
BAbS19_I20060	57.54	BruAb1_2117	identical
BAbS19_I20070	61.86	BruAb1_2118	identical
BAbS19_I20080	62.08	BruAb1_2120	identical
BAbS19_I20090	55.8	BruAb1_2121	identical
BAbS19_I20100	60.77	BruAb1_2122	identical
BAbS19_I20110	55.62	BruAb1_2123	identical
BAbS19_I20120	60.29	BruAb1_2124	identical
BAbS19_I20130	61.28	BruAb1_2125	identical
BAbS19_I20140	60.07	BruAb1_2126	identical
BAbS19_I20150	61.11	BruAb1_2127	identical
BAbS19_I20160	60.45	BruAb1_2128	identical
[truncated: 1,067 more rows]

## Sheet: 3B.S19_genes_to_2308_genome
Table S3B. Pair-wise and reciprocal comparisons between the genes and the genomes of the strains S19, 9-941 and 2308
Locus ID	GC content (%)	Corresponding 2308 gene	type of difference
BAbS19_II08290	57.9	no match	1041 bases deletion at the beginning
BAbS19_II08300	60.08	no match	no match
BAbS19_II08310	55.41	no match	no match
BAbS19_II08320	59.73	BAB2_0904	1825 bases deletion at the beginning
BAbS19_I00170	58.78	no match	447 bases deletion at the beginning
BAbS19_I00180	59.81	no match	no match
BAbS19_I00190	53.33	no match	no match
BAbS19_I00660	52.1	BAB1_0069	1695 base deletion
BAbS19_I18470	58.11	BAB1_1968	seven bases insertion
BAbS19_I18460	57.14	BAB1_1968	seven bases insertion
BAbS19_I15660	56.96	BAB1_1673	twelve bases deletion
BAbS19_II03540	61.4	BAB2_0376	68 bases deletion
BAbS19_II03470	60.36	BAB2_0369 # BAB2_0370	705 bases deletion
BAbS19_I17170	55.3	BAB1_1837	two base deletion and one base deletion
BAbS19_I01720	57.51	BAB1_0181	two bases difference
BAbS19_I04130	56.9	BAB1_0447	two bases difference
BAbS19_I11590	54.66	BAB1_1243	two bases difference
BAbS19_I00200	54.81	no match	two one base difference and one base deletion
BAbS19_I02220	60.9	BAB1_0237	one base deletion
BAbS19_I10630	57.39	no match	one base deletion
BAbS19_I16510	60.35	no match	one base deletion
BAbS19_I17420	47.75	BAB1_1862	one base deletion
BAbS19_I03520	58.36	no match	one base insertion
BAbS19_I11770	54.01	BAB1_1262	one base insertion
BAbS19_I12650	58.16	BAB1_1354	one base insertion
BAbS19_II03610	56.98	BAB2_0384	one base insertion
BAbS19_II09200	54.69	BAB2_0994	one base insertion
BAbS19_II09620	60.53	BAB2_1035	one base insertion
BAbS19_I00100	56.02	BAB1_0010	one base difference
BAbS19_I00540	59.62	BAB1_0057	one base difference
BAbS19_I01410	59.96	BAB1_0149	one base difference
BAbS19_I02010	57.38	BAB1_0214	one base difference
BAbS19_I02080	62.11	no match	one base difference
BAbS19_I02110	63.58	BAB1_0224	one base difference
BAbS19_I02210	59.72	BAB1_0236	one base difference
BAbS19_I02570	52.05	BAB1_0282	one base difference
BAbS19_I03030	58.26	BAB1_0333	one base difference
BAbS19_I04270	62.01	BAB1_0462	one base difference
BAbS19_I05160	49.45	BAB1_0935	one base difference
BAbS19_I05980	58.3	BAB1_0638	one base difference
BAbS19_I06190	57.02	BAB1_0660	one base difference
BAbS19_I06740	58.12	BAB1_0721	one base difference
BAbS19_I07170	56.55	BAB1_0768	one base difference
BAbS19_I07220	59	BAB1_0773	one base difference
BAbS19_I07230	60.36	BAB1_0774	one base difference
BAbS19_I07270	58.67	BAB1_0778	one base difference
BAbS19_I07890	51.45	BAB1_0847	one base difference
BAbS19_I07960	58.21	BAB1_0854	one base difference
BAbS19_I08680	58.47	BAB1_0928	one base difference
BAbS19_I08740	42.11	no match	one base difference
BAbS19_I08760	50.92	BAB1_0937	one base difference
BAbS19_I09030	52.92	BAB1_0967	one base difference
BAbS19_I09570	58.91	BAB1_1031	one base difference
BAbS19_I10070	55.84	BAB1_1085	one base difference
BAbS19_I10500	56.31	BAB1_1131	one base difference
BAbS19_I10690	57.58	BAB1_1151	one base difference
BAbS19_I10750	55.56	BAB1_1157	one base difference
BAbS19_I11290	55.92	BAB1_1213	one base difference
BAbS19_I11320	57.88	BAB1_1216	one base difference
BAbS19_I11580	57.84	BAB1_1242	one base difference
BAbS19_I12550	59.34	BAB1_1344	one base difference
BAbS19_I13500	63.9	BAB1_1444	one base difference
BAbS19_I13770	55.79	BAB1_1473	one base difference
BAbS19_I14270	60.18	BAB1_1530	one base difference
BAbS19_I15200	57.24	BAB1_1627	one base difference
BAbS19_I17250	58.92	BAB1_1845	one base difference
BAbS19_I18830	44.79	no match	one base difference
BAbS19_I18870	51.67	no match	one base difference
BAbS19_I18920	60.61	BAB1_2019	one base difference
BAbS19_I19400	57.73	BAB1_2072	one base difference
BAbS19_I19630	59.68	BAB1_2097	one base difference
BAbS19_I19810	63.45	no match	one base difference
BAbS19_I05250	51.24	no match	one base difference
BAbS19_II00590	56.07	BAB2_0064	one base difference
BAbS19_II01660	62.69	BAB2_0175	one base difference
BAbS19_II02680	61.52	BAB2_0281	one base difference
BAbS19_II02830	56.04	BAB2_0299	one base difference
BAbS19_II02920	59.54	BAB2_0308	one base difference
BAbS19_II04190	57.74	BAB2_0444	one base difference
BAbS19_II04440	49.04	BAB2_0470	one base difference
BAbS19_II04710	59.08	BAB2_0500	one base difference
BAbS19_II04960	60.43	BAB2_0526	one base difference
BAbS19_II05020	55.49	BAB2_0532	one base difference
BAbS19_II05450	59.75	BAB2_0582	one base difference
BAbS19_II05500	58.41	BAB2_0587	one base difference
BAbS19_II05930	60.2	BAB2_0635	one base difference
BAbS19_II06090	54.9	BAB2_0652	one base difference
BAbS19_II06180	60.69	BAB2_0661	one base difference
BAbS19_II06760	57.95	BAB2_0726	one base difference
BAbS19_II07300	60.89	no match	one base difference
BAbS19_II07340	56.01	BAB2_0792	one base difference
BAbS19_II07490	61.66	BAB2_0810	one base difference
BAbS19_II07760	56.39	BAB2_0838	one base difference
BAbS19_II07830	52.47	BAB2_0846	one base difference
BAbS19_II08080	57.79	BAB2_0876	one base difference
BAbS19_II09920	54.44	BAB2_1064	one base difference
BAbS19_II10230	57.51	BAB2_1098	one base difference
BAbS19_II10370	56.82	BAB2_1113	one base difference
BAbS19_II10510	60.62	BAB2_1127	one base difference
BAbS19_II10730	55.09	BAB2_1150	one base difference
BAbS19_I00010	59.48	BAB1_0001	identical
BAbS19_I00020	58.27	BAB1_0002	identical
BAbS19_I00030	61.39	BAB1_0003	identical
BAbS19_I00040	61.61	BAB1_0004	identical
BAbS19_I00050	57.37	BAB1_0005	identical
BAbS19_I00060	59.05	BAB1_0006	identical
BAbS19_I00070	57.89	BAB1_0007	identical
BAbS19_I00080	55.83	BAB1_0008	identical
BAbS19_I00090	57.34	BAB1_0009	identical
BAbS19_I00110	48.26	BAB1_0012	identical
BAbS19_I00120	59.54	no match	identical
BAbS19_I00130	61.51	BAB1_0016	identical
BAbS19_I00140	59.38	BAB1_0017	identical
BAbS19_I00150	62.3	BAB1_0018	identical
BAbS19_I00160	61.62	BAB1_0019	identical
BAbS19_I00210	55.99	BAB1_0022	identical
BAbS19_I00220	61.2	BAB1_0023	identical
BAbS19_I00230	62.73	BAB1_0024	identical
BAbS19_I00240	57.91	BAB1_0025	identical
BAbS19_I00250	59.74	BAB1_0026	identical
BAbS19_I00260	57.33	BAB1_0027	identical
BAbS19_I00270	55.22	BAB1_0028	identical
BAbS19_I00280	59.51	BAB1_0029	identical
BAbS19_I00290	59.88	BAB1_0030	identical
BAbS19_I00300	61.91	BAB1_0031	identical
BAbS19_I00310	61.48	BAB1_0032	identical
BAbS19_I00320	60.02	BAB1_0033	identical
BAbS19_I00330	58.8	BAB1_0034	identical
BAbS19_I00340	60.58	BAB1_0035	identical
BAbS19_I00350	58.38	BAB1_0036	identical
BAbS19_I00360	61	BAB1_0037	identical
BAbS19_I00370	56.02	BAB1_0038	identical
BAbS19_I00400	57.94	BAB1_0041	identical
BAbS19_I00410	55.46	BAB1_0042	identical
BAbS19_I00420	62.57	no match	identical
BAbS19_I00430	59.02	BAB1_0045	identical
BAbS19_I00440	59.79	BAB1_0046	identical
BAbS19_I00450	57.44	BAB1_0047	identical
BAbS19_I00460	55.56	BAB1_0048	identical
BAbS19_I00470	59.22	BAB1_0049	identical
BAbS19_I00480	60.38	BAB1_0050	identical
BAbS19_I00490	58.61	BAB1_0051	identical
BAbS19_I00500	59.65	BAB1_0052	identical
BAbS19_I00510	58.33	BAB1_0053	identical
BAbS19_I00520	62.2	BAB1_0054	identical
BAbS19_I00530	57.84	BAB1_0055	identical
BAbS19_I00550	54.65	BAB1_0058	identical
BAbS19_I00560	58.94	BAB1_0059	identical
BAbS19_I00570	58.84	BAB1_0060	identical
BAbS19_I00580	52.6	BAB1_0061	identical
BAbS19_I00590	46.67	BAB1_0062	identical
BAbS19_I00600	51.85	BAB1_0063	identical
BAbS19_I00610	62.38	BAB1_0064	identical
BAbS19_I00620	57.84	BAB1_0065	identical
BAbS19_I00630	60.57	BAB1_0066	identical
BAbS19_I00640	65.01	BAB1_0067	identical
BAbS19_I00650	64	BAB1_0068	identical
BAbS19_I00670	58.23	BAB1_0071	identical
BAbS19_I00680	56.82	BAB1_0072	identical
BAbS19_I00690	57.94	BAB1_0073	identical
BAbS19_I00700	59.14	BAB1_0074	identical
BAbS19_I00710	57.54	BAB1_0075	identical
BAbS19_I00720	63.54	BAB1_0076	identical
BAbS19_I00730	54.76	BAB1_0077	identical
BAbS19_I00740	55.89	no match	identical
BAbS19_I00750	61.25	BAB1_0080	identical
BAbS19_I00760	56.06	BAB1_0081	identical
BAbS19_I00770	61.87	BAB1_0082	identical
BAbS19_I00780	61.73	BAB1_0083	identical
BAbS19_I00790	57.86	BAB1_0084	identical
BAbS19_I00820	54.73	BAB1_0087	identical
BAbS19_I00830	56.99	BAB1_0088	identical
BAbS19_I00840	56.74	BAB1_0089	identical
BAbS19_I00850	60.27	BAB1_0090	identical
BAbS19_I00860	58.33	BAB1_0091	identical
BAbS19_I00870	62.31	BAB1_0092	identical
BAbS19_I00880	58.3	BAB1_0093	identical
BAbS19_I00890	56.9	BAB1_0094	identical
BAbS19_I00900	59.31	BAB1_0095	identical
BAbS19_I00910	61	BAB1_0096	identical
BAbS19_I00920	54.35	BAB1_0097	identical
BAbS19_I00930	61.57	BAB1_0098	identical
BAbS19_I00940	59.73	BAB1_0099	identical
BAbS19_I00950	49.37	BAB1_0100	identical
BAbS19_I00960	56.79	BAB1_0101	identical
BAbS19_I00970	55.76	BAB1_0102	identical
BAbS19_I00980	54.42	BAB1_0103	identical
BAbS19_I00990	57.73	BAB1_0104	identical
BAbS19_I01000	59.4	BAB1_0105	identical
BAbS19_I01010	59.05	BAB1_0106	identical
BAbS19_I01020	61.56	BAB1_0107	identical
BAbS19_I01030	60.48	BAB1_0108	identical
BAbS19_I01040	58.39	BAB1_0109	identical
BAbS19_I01050	60.77	BAB1_0110	identical
BAbS19_I01060	55.77	BAB1_0111	identical
BAbS19_I01070	59.33	BAB1_0112	identical
BAbS19_I01080	59.6	BAB1_0113	identical
BAbS19_I01090	60.12	BAB1_0114	identical
BAbS19_I01100	56.13	BAB1_0115	identical
BAbS19_I01110	56.19	BAB1_0116	identical
BAbS19_I01120	56.31	BAB1_0117	identical
BAbS19_I01130	59.46	BAB1_0118	identical
BAbS19_I01140	59.35	BAB1_0120	identical
BAbS19_I01150	60.29	BAB1_0121	identical
BAbS19_I01160	59.83	BAB1_0122	identical
BAbS19_I01170	47.41	BAB1_0123	identical
BAbS19_I01180	57.95	BAB1_0124	identical
BAbS19_I01210	56.62	BAB1_0127	identical
BAbS19_I01220	60.92	BAB1_0128	identical
BAbS19_I01230	59.39	BAB1_0129	identical
BAbS19_I01240	64.94	no match	identical
BAbS19_I01250	60.94	BAB1_0132	identical
BAbS19_I01260	58.27	BAB1_0133	identical
BAbS19_I01270	49.08	BAB1_0134	identical
BAbS19_I01280	60.46	BAB1_0136	identical
BAbS19_I01290	63.43	BAB1_0137	identical
BAbS19_I01300	57.33	BAB1_0138	identical
BAbS19_I01310	59.69	BAB1_0139	identical
BAbS19_I01320	60.93	BAB1_0140	identical
BAbS19_I01330	59.83	BAB1_0141	identical
BAbS19_I01340	60.1	BAB1_0142	identical
BAbS19_I01350	58.54	BAB1_0143	identical
BAbS19_I01360	61.52	no match	identical
BAbS19_I01370	61.46	no match	identical
BAbS19_I01380	60.37	BAB1_0146	identical
BAbS19_I01390	58.5	BAB1_0147	identical
BAbS19_I01400	52.8	BAB1_0148	identical
BAbS19_I01440	58.95	BAB1_0151	identical
BAbS19_I01450	56.84	BAB1_0152	identical
BAbS19_I01460	60.16	BAB1_0153	identical
BAbS19_I01470	56.02	BAB1_0154	identical
BAbS19_I01480	60.27	BAB1_0155	identical
BAbS19_I01490	60.16	BAB1_0156	identical
BAbS19_I01500	57.75	BAB1_0157	identical
BAbS19_I01510	58.75	BAB1_0159	identical
BAbS19_I01520	58.49	BAB1_0160	identical
BAbS19_I01530	58.54	BAB1_0161	identical
BAbS19_I01540	56.26	BAB1_0162	identical
BAbS19_I01550	50.7	BAB1_0163	identical
BAbS19_I01560	58.63	BAB1_0164	identical
BAbS19_I01570	60.51	BAB1_0165	identical
BAbS19_I01580	58.4	BAB1_0166	identical
BAbS19_I01590	59.92	BAB1_0168	identical
BAbS19_I01600	59.82	BAB1_0169	identical
BAbS19_I01610	59.18	BAB1_0170	identical
BAbS19_I01620	59.76	BAB1_0171	identical
BAbS19_I01630	62.76	BAB1_0172	identical
BAbS19_I01640	58.62	no match	identical
BAbS19_I01650	57.21	no match	identical
BAbS19_I01660	59.58	BAB1_0175	identical
BAbS19_I01670	60.41	BAB1_0176	identical
BAbS19_I01680	62.28	BAB1_0177	identical
BAbS19_I01690	61.42	BAB1_0178	identical
BAbS19_I01700	64.15	BAB1_0179	identical
BAbS19_I01710	62.71	BAB1_0180	identical
BAbS19_I01730	63.37	BAB1_0182	identical
BAbS19_I01740	59.24	BAB1_0183	identical
BAbS19_I01750	53.4	BAB1_0184	identical
BAbS19_I01760	59.41	BAB1_0185	identical
BAbS19_I01770	56.91	BAB1_0186	identical
BAbS19_I01780	57.85	BAB1_0187	identical
BAbS19_I01790	59.24	BAB1_0188	identical
BAbS19_I01800	51.32	BAB1_0190	identical
BAbS19_I01810	59.52	BAB1_0191	identical
BAbS19_I01820	55.7	BAB1_0193	identical
BAbS19_I01830	58.14	BAB1_0194	identical
BAbS19_I01840	61.35	BAB1_0195	identical
BAbS19_I01850	55.76	BAB1_0196	identical
BAbS19_I01860	57.32	BAB1_0197	identical
BAbS19_I01870	58.33	BAB1_0199	identical
BAbS19_I01880	60.38	BAB1_0200	identical
BAbS19_I01890	64.81	BAB1_0201	identical
BAbS19_I01920	59.03	BAB1_0204	identical
BAbS19_I01930	59.82	no match	identical
BAbS19_I01940	59.82	BAB1_0206	identical
BAbS19_I01980	59.21	BAB1_0211	identical
BAbS19_I01990	63.19	BAB1_0212	identical
BAbS19_I02000	58.94	BAB1_0213	identical
BAbS19_I02020	60.95	BAB1_0215	identical
BAbS19_I02030	62.65	BAB1_0216	identical
BAbS19_I02040	59.09	BAB1_0217	identical
BAbS19_I02050	63.38	BAB1_0218	identical
BAbS19_I02060	62.67	BAB1_0219	identical
BAbS19_I02070	57.72	BAB1_0220	identical
BAbS19_I02090	58.67	BAB1_0222	identical
BAbS19_I02100	61.31	BAB1_0223	identical
BAbS19_I02120	62.29	BAB1_0225	identical
BAbS19_I02130	56.45	BAB1_0226	identical
BAbS19_I02140	45.62	BAB1_0227	identical
BAbS19_I02150	60.82	BAB1_0228	identical
BAbS19_I02160	59.65	BAB1_0230	identical
BAbS19_I02170	58.82	BAB1_0231	identical
BAbS19_I02200	57.48	BAB1_0235	identical
BAbS19_I02230	57.73	BAB1_0238	identical
BAbS19_I02240	58.95	BAB1_0239	identical
BAbS19_I02250	59.82	BAB1_0240	identical
BAbS19_I02260	60.26	BAB1_0241	identical
BAbS19_I02270	59.79	BAB1_0242	identical
BAbS19_I02280	51.01	BAB1_0243	identical
BAbS19_I02290	60.46	BAB1_0244	identical
BAbS19_I02300	52.38	BAB1_0245	identical
BAbS19_I02310	61.5	BAB1_0246	identical
BAbS19_I02320	58.98	BAB1_0247	identical
BAbS19_I02330	58.53	BAB1_0248	identical
BAbS19_I02340	55.47	BAB1_0250	identical
BAbS19_I02350	55.71	BAB1_0252	identical
BAbS19_I02360	53.02	BAB1_0254	identical
BAbS19_I02370	59.86	BAB1_0255	identical
BAbS19_I02400	53.88	no match	identical
BAbS19_I02410	53.79	BAB1_0258	identical
BAbS19_I02420	51.41	BAB1_0259	identical
BAbS19_I02430	55.96	BAB1_0260	identical
BAbS19_I02460	52.94	BAB1_0263	identical
BAbS19_I02470	55.56	BAB1_0266	identical
BAbS19_I02480	48.82	BAB1_0270	identical
BAbS19_I02490	53.66	BAB1_0273	identical
BAbS19_I02500	54.39	BAB1_0274	identical
BAbS19_I02510	51.89	BAB1_0275	identical
BAbS19_I02520	56.48	BAB1_0276	identical
BAbS19_I02530	52.55	BAB1_0277	identical
BAbS19_I02540	46.98	BAB1_0279	identical
BAbS19_I02550	60.19	BAB1_0280	identical
BAbS19_I02560	60.98	BAB1_0281	identical
BAbS19_I02580	58.65	BAB1_0283	identical
BAbS19_I02590	58.8	BAB1_0284	identical
BAbS19_I02600	61.79	BAB1_0285	identical
BAbS19_I02610	55.1	BAB1_0286	identical
BAbS19_I02620	60.93	BAB1_0287	identical
BAbS19_I02630	52.42	no match	identical
BAbS19_I02640	55.63	BAB1_0288	identical
BAbS19_I02650	55.56	no match	identical
BAbS19_I02660	58.25	BAB1_0292	identical
BAbS19_I02670	54.66	no match	identical
BAbS19_I02680	52.56	BAB1_0296	identical
BAbS19_I02690	61.68	BAB1_0297	identical
BAbS19_I02700	60.4	BAB1_0298	identical
BAbS19_I02710	57.84	BAB1_0299	identical
BAbS19_I02720	60.36	BAB1_0300	identical
BAbS19_I02730	59.5	BAB1_0301	identical
BAbS19_I02740	63.17	BAB1_0302	identical
BAbS19_I02750	57.26	BAB1_0303	identical
BAbS19_I02760	58.61	BAB1_0304	identical
BAbS19_I02770	60.68	BAB1_0306	identical
BAbS19_I02780	60.28	BAB1_0307	identical
BAbS19_I02810	59.78	BAB1_0310	identical
BAbS19_I02820	55.12	BAB1_0311	identical
BAbS19_I02830	60.95	BAB1_0313	identical
BAbS19_I02840	61.2	BAB1_0314	identical
BAbS19_I02850	56.29	BAB1_0315	identical
BAbS19_I02860	60.55	BAB1_0316	identical
BAbS19_I02870	58.76	BAB1_0317	identical
BAbS19_I02880	60	BAB1_0318	identical
BAbS19_I02890	58.88	BAB1_0319	identical
BAbS19_I02900	59.34	BAB1_0320	identical
BAbS19_I02910	56.19	BAB1_0321	identical
BAbS19_I02920	59.88	BAB1_0322	identical
BAbS19_I02930	60.2	BAB1_0323	identical
BAbS19_I02940	52.98	BAB1_0324	identical
BAbS19_I02950	58.24	BAB1_0325	identical
BAbS19_I02960	58.21	BAB1_0326	identical
BAbS19_I02970	56.77	BAB1_0327	identical
BAbS19_I02980	60.9	BAB1_0328	identical
BAbS19_I02990	61.33	BAB1_0329	identical
BAbS19_I03000	55.43	BAB1_0330	identical
BAbS19_I03010	59.74	BAB1_0331	identical
BAbS19_I03020	57.61	BAB1_0332	identical
BAbS19_I03040	56.74	BAB1_0334	identical
BAbS19_I03050	59.48	BAB1_0335	identical
BAbS19_I03060	61.08	BAB1_0336	identical
BAbS19_I03070	59.88	BAB1_0337	identical
BAbS19_I03080	53.18	BAB1_0338	identical
BAbS19_I03090	59.83	BAB1_0339	identical
BAbS19_I03100	59.73	BAB1_0340	identical
BAbS19_I03110	60.37	BAB1_0341	identical
BAbS19_I03120	58.19	BAB1_0342	identical
BAbS19_I03130	58.77	BAB1_0343	identical
BAbS19_I03140	58.99	BAB1_0344	identical
BAbS19_I03150	58.57	BAB1_0345	identical
BAbS19_I03160	60.72	BAB1_0346	identical
BAbS19_I03170	53.7	BAB1_0347	identical
BAbS19_I03180	52.52	BAB1_0348	identical
BAbS19_I03190	58.53	BAB1_0349	identical
BAbS19_I03200	57.41	BAB1_0350	identical
BAbS19_I03210	56.53	BAB1_0351	identical
BAbS19_I03220	52.1	BAB1_0352	identical
BAbS19_I03230	48.92	BAB1_0353	identical
BAbS19_I03240	59.37	BAB1_0354	identical
BAbS19_I03250	61.9	BAB1_0355	identical
BAbS19_I03260	62.71	BAB1_0356	identical
BAbS19_I03270	58.94	BAB1_0358	identical
BAbS19_I03280	61	BAB1_0359	identical
BAbS19_I03290	62.44	BAB1_0360	identical
BAbS19_I03300	54.83	BAB1_0361	identical
BAbS19_I03310	53.76	no match	identical
BAbS19_I03320	51.02	BAB1_0362	identical
BAbS19_I03330	52.73	BAB1_0363	identical
BAbS19_I03340	55.23	BAB1_0364	identical
BAbS19_I03350	61.32	BAB1_0366	identical
BAbS19_I03360	43.52	no match	identical
BAbS19_I03390	59.39	BAB1_0368	identical
BAbS19_I03400	58.48	BAB1_0369	identical
BAbS19_I03410	55.92	BAB1_0370	identical
BAbS19_I03420	54.24	no match	identical
BAbS19_I03430	59.46	BAB1_0372	identical
BAbS19_I03440	58.51	BAB1_0373	identical
BAbS19_I03450	59.83	BAB1_0374	identical
BAbS19_I03460	61.13	BAB1_0375	identical
BAbS19_I03470	56.52	BAB1_0376	identical
BAbS19_I03480	61.05	BAB1_0377	identical
BAbS19_I03490	59.73	no match	identical
BAbS19_I03500	64.2	no match	identical
BAbS19_I03510	58.99	BAB1_0380	identical
BAbS19_I03530	58.43	BAB1_0382	identical
BAbS19_I03540	58.7	BAB1_0383	identical
BAbS19_I03550	62.08	BAB1_0384	identical
BAbS19_I03560	53.46	BAB1_0385	identical
BAbS19_I03570	60.82	BAB1_0386	identical
BAbS19_I03580	56.83	BAB1_0387	identical
BAbS19_I03590	58.28	BAB1_0388	identical
BAbS19_I03600	60.88	BAB1_0389	identical
BAbS19_I03610	49.69	BAB1_0390	identical
BAbS19_I03620	58.88	BAB1_0391	identical
BAbS19_I03630	57.87	BAB1_0392	identical
BAbS19_I03640	58.82	BAB1_0393	identical
BAbS19_I03650	52.02	BAB1_0394	identical
BAbS19_I03660	57.24	BAB1_0395	identical
BAbS19_I03670	60.54	no match	identical
BAbS19_I03680	59.39	BAB1_0398	identical
BAbS19_I03690	52.99	BAB1_0399	identical
BAbS19_I03700	60.06	BAB1_0400	identical
BAbS19_I03710	61.78	BAB1_0401	identical
BAbS19_I03720	55.93	BAB1_0402	identical
BAbS19_I03730	59.59	BAB1_0403	identical
BAbS19_I03740	62.5	BAB1_0404	identical
BAbS19_I03750	61.57	BAB1_0405	identical
BAbS19_I03760	57.02	BAB1_0406	identical
BAbS19_I03770	52.38	BAB1_0407	identical
BAbS19_I03780	60.39	BAB1_0408	identical
BAbS19_I03790	56.14	BAB1_0410	identical
BAbS19_I03800	55.87	BAB1_0411	identical
BAbS19_I03810	62.28	BAB1_0412	identical
BAbS19_I03820	63	BAB1_0413	identical
BAbS19_I03830	56.25	BAB1_0414	identical
BAbS19_I03840	63.76	BAB1_0415	identical
BAbS19_I03850	61.13	BAB1_0416	identical
BAbS19_I03860	62.33	BAB1_0417	identical
BAbS19_I03870	58.23	BAB1_0418	identical
BAbS19_I03880	56.14	BAB1_0420	identical
BAbS19_I03890	60.22	BAB1_0423	identical
BAbS19_I03900	60.75	BAB1_0424	identical
BAbS19_I03910	59.48	BAB1_0425	identical
BAbS19_I03920	65.26	BAB1_0427	identical
BAbS19_I03930	53.07	BAB1_0428	identical
BAbS19_I03940	61.95	BAB1_0429	identical
BAbS19_I03950	59.11	BAB1_0430	identical
BAbS19_I03960	57.1	BAB1_0431	identical
BAbS19_I03970	54.39	BAB1_0432	identical
BAbS19_I03980	59.85	BAB1_0433	identical
BAbS19_I03990	64.92	BAB1_0434	identical
BAbS19_I04000	59.02	BAB1_0435	identical
BAbS19_I04010	52.52	BAB1_0436	identical
BAbS19_I04020	54.79	BAB1_0437	identical
BAbS19_I04030	62.08	BAB1_0438	identical
BAbS19_I04040	60.69	BAB1_0439	identical
BAbS19_I04050	61.16	BAB1_0440	identical
BAbS19_I04060	57.85	BAB1_0441	identical
BAbS19_I04070	61.14	BAB1_0442	identical
BAbS19_I04080	61.48	BAB1_0443	identical
BAbS19_I04090	60.13	BAB1_0444	identical
BAbS19_I04100	56.26	BAB1_0445	identical
BAbS19_I04110	60.19	BAB1_0446	identical
BAbS19_I04120	48.15	no match	identical
BAbS19_I04140	58.71	BAB1_0448	identical
BAbS19_I04150	53.33	BAB1_0449	identical
BAbS19_I04160	55.87	BAB1_0451	identical
BAbS19_I04170	60.06	BAB1_0452	identical
BAbS19_I04180	50	BAB1_0453	identical
BAbS19_I04190	60.82	BAB1_0454	identical
BAbS19_I04200	60.22	BAB1_0455	identical
BAbS19_I04210	58.25	BAB1_0456	identical
BAbS19_I04220	56.86	BAB1_0457	identical
BAbS19_I04230	57.61	BAB1_0458	identical
BAbS19_I04240	52.87	BAB1_0459	identical
BAbS19_I04250	63.78	BAB1_0460	identical
BAbS19_I04260	60.94	BAB1_0461	identical
BAbS19_I04280	61.81	BAB1_0463	identical
BAbS19_I04290	63.62	BAB1_0464	identical
BAbS19_I04300	57.71	BAB1_0465	identical
BAbS19_I04310	51.64	BAB1_0466	identical
BAbS19_I04320	61.82	BAB1_0467	identical
BAbS19_I04330	58.24	BAB1_0468	identical
BAbS19_I04340	59.51	BAB1_0469	identical
BAbS19_I04350	59.26	BAB1_0470	identical
BAbS19_I04360	61	BAB1_0471	identical
BAbS19_I04370	58.95	BAB1_0472	identical
BAbS19_I04380	58.38	BAB1_0473	identical
BAbS19_I04390	62.46	BAB1_0474	identical
BAbS19_I04400	58.57	BAB1_0475	identical
BAbS19_I04410	55.97	BAB1_0476	identical
BAbS19_I04420	58.25	BAB1_0477	identical
BAbS19_I04430	62.28	BAB1_0478	identical
BAbS19_I04440	58.63	BAB1_0479	identical
BAbS19_I04450	61.52	BAB1_0480	identical
BAbS19_I04460	61.48	BAB1_0482	identical
BAbS19_I04470	59.08	BAB1_0483	identical
BAbS19_I04480	53.59	BAB1_0484	identical
BAbS19_I04490	62.07	BAB1_0486	identical
BAbS19_I04500	59	BAB1_0487	identical
BAbS19_I04510	61.44	BAB1_0488	identical
BAbS19_I04520	57.77	BAB1_0489	identical
BAbS19_I04530	61.15	BAB1_0490	identical
BAbS19_I04540	64.07	BAB1_0491	identical
BAbS19_I04550	58.36	BAB1_0492	identical
BAbS19_I04560	59.86	BAB1_0493	identical
BAbS19_I04570	58.05	no match	identical
BAbS19_I04600	57.79	BAB1_0497	identical
BAbS19_I04630	60.13	BAB1_0500	identical
BAbS19_I04640	58.79	BAB1_0501	identical
BAbS19_I04650	58.72	BAB1_0502	identical
BAbS19_I04660	59.78	BAB1_0503	identical
BAbS19_I04670	58.64	BAB1_0504	identical
BAbS19_I04680	59.55	BAB1_0505	identical
BAbS19_I04690	59.19	BAB1_0506	identical
BAbS19_I04700	60.14	BAB1_0507	identical
BAbS19_I04710	54.95	BAB1_0508	identical
BAbS19_I04720	59.16	BAB1_0509	identical
BAbS19_I04730	58.76	BAB1_0510	identical
BAbS19_I04740	47.97	no match	identical
BAbS19_I04750	55.27	BAB1_0511	identical
BAbS19_I04760	56.27	BAB1_0512	identical
BAbS19_I04770	56.99	BAB1_0513	identical
BAbS19_I04780	59.97	BAB1_0514	identical
BAbS19_I04790	61.69	BAB1_0515	identical
BAbS19_I04800	59.69	BAB1_0516	identical
BAbS19_I04810	57.61	BAB1_0517	identical
BAbS19_I04820	60.46	BAB1_0518	identical
BAbS19_I04830	60.98	BAB1_0519	identical
BAbS19_I04840	53.33	BAB1_0520	identical
BAbS19_I04850	54.28	BAB1_0521	identical
BAbS19_I04860	63.46	BAB1_0522	identical
BAbS19_I04870	58.16	no match	identical
BAbS19_I04880	56.83	BAB1_0524	identical
BAbS19_I04890	60.85	BAB1_0525	identical
BAbS19_I04900	57.26	BAB1_0526	identical
BAbS19_I04910	60.69	BAB1_0527	identical
BAbS19_I04920	59.01	BAB1_0528	identical
BAbS19_I04930	61.26	BAB1_0529	identical
BAbS19_I04940	59.5	BAB1_0530	identical
BAbS19_I04950	55.88	BAB1_0531	identical
BAbS19_I04960	58.26	BAB1_0532	identical
BAbS19_I04970	57.95	BAB1_0533	identical
BAbS19_I04980	56.66	BAB1_0534	identical
BAbS19_I04990	55.95	BAB1_0535	identical
BAbS19_I05000	58.36	BAB1_0536	identical
BAbS19_I05010	58.25	BAB1_0536	identical
BAbS19_I05020	54.55	no match	identical
BAbS19_I05030	53.17	BAB1_0537	identical
BAbS19_I05040	56.44	BAB1_0539	identical
BAbS19_I05050	46.3	no match	identical
BAbS19_I05060	45.13	BAB1_0540	identical
BAbS19_I05070	44.56	BAB1_0541	identical
BAbS19_I05080	49.01	BAB1_0542	identical
BAbS19_I05090	45.99	BAB1_0543	identical
BAbS19_I05100	47.28	BAB1_0544	identical
BAbS19_I05110	47.93	BAB1_0545	identical
BAbS19_I05120	60.37	BAB1_0546	identical
BAbS19_I05130	57.22	BAB1_0548	identical
BAbS19_I05140	49.44	BAB1_0549	identical
BAbS19_I05150	58.54	BAB1_0936	identical
BAbS19_I05170	44.13	BAB1_0553	identical
BAbS19_I05180	57.18	BAB1_0554	identical
BAbS19_I05190	47.37	BAB1_0555	identical
BAbS19_I05200	54.35	no match	identical
BAbS19_I05210	57.79	BAB1_0558	identical
BAbS19_I05220	54.33	BAB1_0559	identical
BAbS19_I05230	50.74	BAB1_0560	identical
BAbS19_I05240	51.16	BAB1_0561	identical
BAbS19_I05260	51.17	BAB1_0563	identical
BAbS19_I05270	57.21	BAB1_0565	identical
BAbS19_I05280	56.89	BAB1_0566	identical
BAbS19_I05290	57.11	BAB1_0567	identical
BAbS19_I05300	57.74	BAB1_0568	identical
BAbS19_I05310	59.02	no match	identical
BAbS19_I05320	56.27	BAB1_0570	identical
BAbS19_I05330	61.78	BAB1_0571	identical
BAbS19_I05340	59.21	BAB1_0572	identical
BAbS19_I05350	59.17	no match	identical
BAbS19_I05360	57.41	no match	identical
BAbS19_I05370	58.81	BAB1_0576	identical
BAbS19_I05380	59.66	BAB1_0577	identical
BAbS19_I05390	58.09	BAB1_0578	identical
BAbS19_I05400	60.58	BAB1_0579	identical
BAbS19_I05410	58.81	BAB1_0580	identical
BAbS19_I05420	50	BAB1_0581	identical
BAbS19_I05430	51.08	BAB1_0582	identical
BAbS19_I05440	55.79	BAB1_0583	identical
BAbS19_I05470	59.78	no match	identical
BAbS19_I05480	60.06	BAB1_0587	identical
BAbS19_I05490	59.59	BAB1_0588	identical
BAbS19_I05500	60.67	BAB1_0589	identical
BAbS19_I05510	58.26	BAB1_0590	identical
BAbS19_I05520	53.83	BAB1_0591	identical
BAbS19_I05530	60.12	BAB1_0592	identical
BAbS19_I05540	57.75	BAB1_0593	identical
BAbS19_I05550	54.31	BAB1_0594	identical
BAbS19_I05560	54.81	BAB1_0595	identical
BAbS19_I05570	57.02	BAB1_0596	identical
BAbS19_I05580	59.5	BAB1_0597	identical
BAbS19_I05590	60.21	BAB1_0598	identical
BAbS19_I05600	59.62	BAB1_0599	identical
BAbS19_I05610	56.44	BAB1_0600	identical
BAbS19_I05620	59.29	BAB1_0601	identical
BAbS19_I05630	60.37	BAB1_0602	identical
BAbS19_I05640	56.9	BAB1_0603	identical
BAbS19_I05650	58.5	BAB1_0604	identical
BAbS19_I05660	54.88	BAB1_0605	identical
BAbS19_I05670	62.91	BAB1_0606	identical
BAbS19_I05680	59.25	BAB1_0607	identical
BAbS19_I05690	60.04	BAB1_0608	identical
BAbS19_I05700	64.92	BAB1_0609	identical
BAbS19_I05710	62.06	BAB1_0610	identical
BAbS19_I05720	61.38	BAB1_0611	identical
BAbS19_I05730	62.93	BAB1_0612	identical
BAbS19_I05740	59.92	BAB1_0613	identical
BAbS19_I05750	58.91	BAB1_0614	identical
BAbS19_I05760	58.11	BAB1_0615	identical
BAbS19_I05770	57.68	BAB1_0616	identical
BAbS19_I05780	58.21	BAB1_0617	identical
BAbS19_I05790	61.4	BAB1_0618	identical
BAbS19_I05800	63.55	BAB1_0619	identical
BAbS19_I05810	59.08	BAB1_0620	identical
BAbS19_I05820	61.86	no match	identical
BAbS19_I05830	64.54	BAB1_0623	identical
BAbS19_I05860	56.04	BAB1_0626	identical
BAbS19_I05870	62.63	BAB1_0627	identical
BAbS19_I05880	57.97	BAB1_0628	identical
BAbS19_I05890	58.66	BAB1_0629	identical
BAbS19_I05900	59.82	BAB1_0630	identical
BAbS19_I05910	61.84	BAB1_0631	identical
BAbS19_I05920	59.44	BAB1_0632	identical
BAbS19_I05930	60.04	BAB1_0633	identical
BAbS19_I05940	55.56	BAB1_0634	identical
BAbS19_I05950	60.51	BAB1_0635	identical
BAbS19_I05960	60.03	BAB1_0636	identical
BAbS19_I05970	58.9	BAB1_0637	identical
BAbS19_I05990	50.13	BAB1_0639	identical
BAbS19_I06000	60.71	BAB1_0640	identical
BAbS19_I06010	59.39	BAB1_0641	identical
BAbS19_I06020	58.8	BAB1_0642	identical
BAbS19_I06030	58.87	BAB1_0643	identical
BAbS19_I06040	61.51	BAB1_0644	identical
BAbS19_I06050	59.22	BAB1_0645	identical
BAbS19_I06060	59.44	BAB1_0646	identical
BAbS19_I06070	58.48	BAB1_0647	identical
BAbS19_I06080	51.77	BAB1_0648	identical
BAbS19_I06090	54.57	BAB1_0649	identical
BAbS19_I06100	58.05	BAB1_0650	identical
BAbS19_I06110	54.7	BAB1_0651	identical
BAbS19_I06120	56.98	BAB1_0652	identical
BAbS19_I06130	56.42	BAB1_0653	identical
BAbS19_I06140	57.76	BAB1_0655	identical
BAbS19_I06150	61.19	BAB1_0656	identical
BAbS19_I06160	55.82	BAB1_0657	identical
BAbS19_I06170	52.21	BAB1_0658	identical
BAbS19_I06180	57.45	BAB1_0659	identical
BAbS19_I06200	53.74	BAB1_0661	identical
BAbS19_I06210	57.99	BAB1_0663	identical
BAbS19_I06220	59.65	BAB1_0664	identical
BAbS19_I06230	56.92	BAB1_0666	identical
BAbS19_I06240	55.77	BAB1_0667	identical
BAbS19_I06250	58.18	BAB1_0668	identical
BAbS19_I06260	54.34	BAB1_0669	identical
BAbS19_I06270	35.26	BAB1_0670	identical
BAbS19_I06280	56.22	BAB1_0671	identical
BAbS19_I06290	58.34	BAB1_0672	identical
BAbS19_I06300	60.45	BAB1_0673	identical
BAbS19_I06310	56.35	BAB1_0674	identical
BAbS19_I06320	57.23	BAB1_0675	identical
BAbS19_I06330	59.24	BAB1_0676	identical
BAbS19_I06340	58.51	BAB1_0677	identical
BAbS19_I06350	61.11	BAB1_0678	identical
BAbS19_I06360	54.81	BAB1_0679	identical
BAbS19_I06370	56.58	BAB1_0680	identical
BAbS19_I06380	58.81	BAB1_0681	identical
BAbS19_I06390	57.59	BAB1_0683	identical
BAbS19_I06400	59.01	BAB1_0684	identical
BAbS19_I06410	62.16	BAB1_0685	identical
BAbS19_I06420	59.74	BAB1_0686	identical
BAbS19_I06430	57.84	BAB1_0687	identical
BAbS19_I06440	59.7	BAB1_0688	identical
BAbS19_I06450	58.69	BAB1_0689	identical
BAbS19_I06460	51.31	BAB1_0690	identical
BAbS19_I06470	55.73	BAB1_0691	identical
BAbS19_I06480	58.33	BAB1_0692	identical
BAbS19_I06490	60.51	BAB1_0693	identical
BAbS19_I06500	60	BAB1_0694	identical
BAbS19_I06510	57.74	BAB1_0695	identical
BAbS19_I06520	48.15	BAB1_0696	identical
BAbS19_I06530	59.11	BAB1_0697	identical
BAbS19_I06540	59.36	BAB1_0701	identical
BAbS19_I06550	57.87	BAB1_0702	identical
BAbS19_I06560	57.93	BAB1_0703	identical
BAbS19_I06570	59.57	BAB1_0704	identical
BAbS19_I06580	60.47	BAB1_0705	identical
BAbS19_I06590	56.74	BAB1_0706	identical
BAbS19_I06600	55.54	BAB1_0707	identical
BAbS19_I06610	54.27	BAB1_0708	identical
BAbS19_I06620	56	BAB1_0709	identical
BAbS19_I06630	58.63	BAB1_0710	identical
BAbS19_I06640	56.22	BAB1_0711	identical
BAbS19_I06650	62.06	BAB1_0712	identical
BAbS19_I06660	58.7	BAB1_0713	identical
BAbS19_I06670	56.92	BAB1_0714	identical
BAbS19_I06680	57.92	BAB1_0715	identical
BAbS19_I06690	56.29	BAB1_0716	identical
BAbS19_I06700	56.5	BAB1_0717	identical
BAbS19_I06710	53.1	BAB1_0718	identical
BAbS19_I06720	55.21	BAB1_0719	identical
BAbS19_I06730	59.58	BAB1_0720	identical
BAbS19_I06750	56.1	BAB1_0722	identical
BAbS19_I06760	57.5	BAB1_0723	identical
BAbS19_I06770	58.7	BAB1_0724	identical
BAbS19_I06780	61.57	BAB1_0725	identical
BAbS19_I06790	58.08	BAB1_0726	identical
BAbS19_I06800	62.41	BAB1_0727	identical
BAbS19_I06810	59.33	BAB1_0728	identical
BAbS19_I06820	63.05	BAB1_0729	identical
BAbS19_I06830	59.87	BAB1_0730	identical
BAbS19_I06840	60.74	BAB1_0731	identical
BAbS19_I06850	51.67	BAB1_0732	identical
BAbS19_I06860	57.75	BAB1_0733	identical
BAbS19_I06870	58.97	BAB1_0734	identical
BAbS19_I06880	62.6	BAB1_0735	identical
BAbS19_I06890	58.3	BAB1_0736	identical
BAbS19_I06900	49.36	BAB1_0737	identical
BAbS19_I06910	39.74	no match	identical
BAbS19_I06920	58.18	BAB1_0738	identical
BAbS19_I06930	53.27	BAB1_0739	identical
BAbS19_I06940	54.89	BAB1_0740	identical
BAbS19_I06950	53.1	BAB1_0741	identical
BAbS19_I06960	53.48	BAB1_0742	identical
BAbS19_I06970	52.15	BAB1_0743	identical
BAbS19_I06980	51.57	BAB1_0744	identical
BAbS19_I06990	52.34	BAB1_0747	identical
BAbS19_I07000	52.22	no match	identical
BAbS19_I07030	48.44	BAB1_0751	identical
BAbS19_I07040	46.33	BAB1_0752	identical
BAbS19_I07080	56.88	BAB1_0756	identical
BAbS19_I07090	58.5	BAB1_0757	identical
BAbS19_I07100	48.72	BAB1_0759	identical
BAbS19_I07110	56.32	BAB1_0760	identical
BAbS19_I07120	56.51	BAB1_0761	identical
BAbS19_I07150	55.56	no match	identical
BAbS19_I07160	58.14	BAB1_0767	identical
BAbS19_I07180	54.9	BAB1_0769	identical
BAbS19_I07190	58.96	BAB1_0770	identical
BAbS19_I07200	54.51	BAB1_0771	identical
BAbS19_I07210	56.89	BAB1_0772	identical
BAbS19_I07240	58.39	BAB1_0775	identical
BAbS19_I07250	55.89	BAB1_0776	identical
BAbS19_I07260	58.06	BAB1_0777	identical
BAbS19_I07280	53.93	BAB1_0779	identical
BAbS19_I07290	59.34	BAB1_0780	identical
BAbS19_I07300	58.29	BAB1_0781	identical
BAbS19_I07310	58.39	BAB1_0782	identical
BAbS19_I07320	55.62	BAB1_0783	identical
BAbS19_I07330	53.19	BAB1_0784	identical
BAbS19_I07340	58.06	BAB1_0785	identical
BAbS19_I07350	52.59	BAB1_0786	identical
BAbS19_I07360	58.24	BAB1_0787	identical
BAbS19_I07370	58.07	BAB1_0788	identical
BAbS19_I07380	61.85	BAB1_0789	identical
BAbS19_I07390	57.31	BAB1_0790	identical
BAbS19_I07400	58.23	BAB1_0791	identical
BAbS19_I07410	59.11	BAB1_0792	identical
BAbS19_I07420	59.83	BAB1_0793	identical
BAbS19_I07430	58.33	BAB1_0794	identical
BAbS19_I07440	53.33	BAB1_0795	identical
BAbS19_I07450	55.2	BAB1_0796	identical
BAbS19_I07460	58.12	BAB1_0797	identical
BAbS19_I07470	59.57	BAB1_0798	identical
BAbS19_I07480	52.78	BAB1_0799	identical
BAbS19_I07490	58.15	BAB1_0800	identical
BAbS19_I07500	53.14	BAB1_0801	identical
BAbS19_I07510	55.62	BAB1_0802	identical
BAbS19_I07520	53.3	BAB1_0804	identical
BAbS19_I07530	54.75	BAB1_0805	identical
BAbS19_I07540	54.79	BAB1_0806	identical
BAbS19_I07550	58.59	BAB1_0807	identical
BAbS19_I07560	59.27	BAB1_0808	identical
BAbS19_I07570	59.52	BAB1_0809	identical
BAbS19_I07580	61.43	BAB1_0810	identical
BAbS19_I07590	57.42	BAB1_0811	identical
BAbS19_I07600	58.84	BAB1_0812	identical
BAbS19_I07610	57.24	BAB1_0813	identical
BAbS19_I07620	61.58	no match	identical
BAbS19_I07630	48.26	BAB1_0819	identical
BAbS19_I07640	44.26	BAB1_0820	identical
BAbS19_I07650	54	BAB1_0821	identical
BAbS19_I07660	52.46	BAB1_0822	identical
BAbS19_I07670	59.97	BAB1_0823	identical
BAbS19_I07680	56.65	BAB1_0824	identical
BAbS19_I07690	57.93	BAB1_0825	identical
BAbS19_I07700	58.68	BAB1_0826	identical
BAbS19_I07710	59.33	BAB1_0827	identical
BAbS19_I07720	61.15	BAB1_0828	identical
BAbS19_I07730	55.27	BAB1_0829	identical
BAbS19_I07740	58.94	BAB1_0830	identical
BAbS19_I07750	57.77	BAB1_0831	identical
BAbS19_I07760	51.78	BAB1_0832	identical
BAbS19_I07770	57.3	BAB1_0833	identical
BAbS19_I07780	57.59	BAB1_0834	identical
BAbS19_I07790	56.99	BAB1_0835	identical
BAbS19_I07800	58.4	BAB1_0836	identical
BAbS19_I07810	59.75	BAB1_0837	identical
BAbS19_I07820	57.28	BAB1_0838	identical
BAbS19_I07830	53.7	BAB1_0839	identical
BAbS19_I07840	56.88	BAB1_0842	identical
BAbS19_I07850	57.53	BAB1_0843	identical
BAbS19_I07860	61.55	BAB1_0844	identical
BAbS19_I07870	57.99	BAB1_0845	identical
BAbS19_I07880	55.56	BAB1_0846	identical
BAbS19_I07930	57.61	BAB1_0851	identical
BAbS19_I07940	55.33	BAB1_0852	identical
BAbS19_I07950	57.97	BAB1_0853	identical
BAbS19_I07970	50.15	BAB1_0855	identical
BAbS19_I07980	58.55	BAB1_0856	identical
BAbS19_I07990	59.15	BAB1_0857	identical
BAbS19_I08000	62.44	BAB1_0858	identical
BAbS19_I08010	56.94	BAB1_0859	identical
BAbS19_I08020	60.57	BAB1_0860	identical
BAbS19_I08030	58.85	BAB1_0861	identical
BAbS19_I08040	55.95	BAB1_0862	identical
BAbS19_I08050	56.17	BAB1_0863	identical
BAbS19_I08060	57.94	BAB1_0864	identical
BAbS19_I08070	58.73	BAB1_0865	identical
BAbS19_I08080	61.42	BAB1_0867	identical
BAbS19_I08090	59.45	BAB1_0868	identical
BAbS19_I08100	60.62	BAB1_0869	identical
BAbS19_I08110	57.5	BAB1_0870	identical
BAbS19_I08120	61.42	BAB1_0871	identical
BAbS19_I08130	60.64	BAB1_0872	identical
BAbS19_I08140	60.83	BAB1_0873	identical
BAbS19_I08150	51.06	BAB1_0874	identical
BAbS19_I08160	60.24	BAB1_0875	identical
BAbS19_I08170	57.09	BAB1_0876	identical
BAbS19_I08180	59.85	no match	identical
BAbS19_I08190	58.33	BAB1_0878	identical
BAbS19_I08200	59.04	BAB1_0879	identical
BAbS19_I08210	58.48	BAB1_0880	identical
BAbS19_I08220	55.01	BAB1_0881	identical
BAbS19_I08230	59.34	BAB1_0882	identical
BAbS19_I08240	57.45	BAB1_0883	identical
BAbS19_I08250	54.67	BAB1_0884	identical
BAbS19_I08260	62.32	BAB1_0885	identical
BAbS19_I08270	62.06	BAB1_0886	identical
BAbS19_I08280	54.58	BAB1_0887	identical
BAbS19_I08290	58.82	no match	identical
BAbS19_I08300	57.58	BAB1_0890	identical
BAbS19_I08310	57.21	BAB1_0891	identical
BAbS19_I08320	55.11	BAB1_0892	identical
BAbS19_I08330	57.49	BAB1_0893	identical
BAbS19_I08340	54.74	BAB1_0894	identical
BAbS19_I08350	58.56	BAB1_0895	identical
BAbS19_I08360	56.94	BAB1_0896	identical
BAbS19_I08370	59.3	BAB1_0897	identical
BAbS19_I08380	59.22	BAB1_0898	identical
BAbS19_I08390	60.92	BAB1_0899	identical
BAbS19_I08400	60.74	BAB1_0900	identical
BAbS19_I08410	56.16	BAB1_0901	identical
BAbS19_I08420	56.36	BAB1_0902	identical
BAbS19_I08430	57.21	BAB1_0903	identical
BAbS19_I08440	59.35	BAB1_0904	identical
BAbS19_I08450	60.81	BAB1_0905	identical
BAbS19_I08460	58.45	BAB1_0906	identical
BAbS19_I08470	60.51	BAB1_0907	identical
BAbS19_I08480	54.9	BAB1_0908	identical
BAbS19_I08490	54.39	BAB1_0909	identical
BAbS19_I08500	56.74	BAB1_0910	identical
BAbS19_I08510	60.51	BAB1_0911	identical
BAbS19_I08520	58.03	BAB1_0912	identical
BAbS19_I08530	59.74	BAB1_0913	identical
BAbS19_I08540	59.86	BAB1_0914	identical
BAbS19_I08550	56.73	BAB1_0915	identical
BAbS19_I08560	56.14	BAB1_0916	identical
BAbS19_I08570	56.43	BAB1_0917	identical
BAbS19_I08580	57.22	BAB1_0918	identical
BAbS19_I08590	53.57	BAB1_0919	identical
BAbS19_I08600	58.88	BAB1_0920	identical
BAbS19_I08610	46.83	BAB1_0921	identical
BAbS19_I08620	58.11	BAB1_0922	identical
BAbS19_I08630	59.19	BAB1_0923	identical
BAbS19_I08640	57.54	BAB1_0924	identical
BAbS19_I08650	61.15	BAB1_0925	identical
BAbS19_I08660	54.64	BAB1_0926	identical
BAbS19_I08670	56.14	BAB1_0927	identical
BAbS19_I08690	59.36	BAB1_0929	identical
BAbS19_I08700	58.83	BAB1_0930	identical
BAbS19_I08710	56.9	BAB1_0931	identical
BAbS19_I08720	58.29	BAB1_0932	identical
BAbS19_I08730	57.76	BAB1_0933	identical
BAbS19_I08750	58.81	BAB1_0936	identical
BAbS19_I08770	52.94	BAB1_0938	identical
BAbS19_I08780	61.71	BAB1_0939	identical
BAbS19_I08790	57	BAB1_0940	identical
BAbS19_I08800	56.13	BAB1_0941	identical
BAbS19_I08810	56.5	BAB1_0942	identical
BAbS19_I08820	58.37	BAB1_0943	identical
BAbS19_I08830	60.52	BAB1_0944	identical
BAbS19_I08840	55.56	BAB1_0945	identical
BAbS19_I08850	57.48	BAB1_0946	identical
BAbS19_I08860	58.47	BAB1_0947	identical
BAbS19_I08870	55.91	BAB1_0948	identical
BAbS19_I08880	55.95	BAB1_0949	identical
BAbS19_I08890	59.31	BAB1_0950	identical
BAbS19_I08900	55.58	BAB1_0951	identical
BAbS19_I08910	57.62	BAB1_0952	identical
BAbS19_I08920	51.65	BAB1_0953	identical
BAbS19_I08930	54.52	BAB1_0954	identical
BAbS19_I08940	57.83	BAB1_0955	identical
BAbS19_I08950	56.41	BAB1_0956	identical
BAbS19_I08960	53.22	no match	identical
BAbS19_I08970	56.48	no match	identical
BAbS19_I08980	59.7	BAB1_0960	identical
BAbS19_I08990	56.05	BAB1_0962	identical
BAbS19_I09000	59.16	BAB1_0963	identical
BAbS19_I09010	58.06	BAB1_0964	identical
BAbS19_I09020	57.15	BAB1_0966	identical
BAbS19_I09060	56.55	no match	identical
BAbS19_I09070	52.53	BAB1_0971	identical
BAbS19_I09080	54.2	BAB1_0972	identical
BAbS19_I09090	58.26	BAB1_0973	identical
BAbS19_I09100	55.28	BAB1_0974	identical
BAbS19_I09110	57.42	no match	identical
BAbS19_I09120	58.33	BAB1_0977	identical
BAbS19_I09150	53.97	BAB1_0981	identical
BAbS19_I09160	50.78	BAB1_0983	identical
BAbS19_I09170	57.12	no match	identical
BAbS19_I09180	51.52	BAB1_0986	identical
BAbS19_I09190	57.61	BAB1_0987	identical
BAbS19_I09200	56.17	no match	identical
BAbS19_I09210	54.59	no match	identical
BAbS19_I09220	55.56	BAB1_0993	identical
BAbS19_I09230	47.66	BAB1_0994	identical
BAbS19_I09240	58.04	BAB1_1115	identical
BAbS19_I09250	58.81	BAB1_0996	identical
BAbS19_I09260	49.08	BAB1_0551	identical
BAbS19_I09290	47.81	no match	identical
BAbS19_I09300	46.63	BAB1_0999	identical
BAbS19_I09310	45	BAB1_1000	identical
BAbS19_I09320	59.68	BAB1_1002	identical
BAbS19_I09330	51.11	no match	identical
BAbS19_I09340	46.08	BAB1_1006	identical
BAbS19_I09350	55.46	BAB1_1008	identical
BAbS19_I09360	57.82	BAB1_1009	identical
BAbS19_I09370	58.19	BAB1_1010	identical
BAbS19_I09380	57.52	BAB1_1011	identical
BAbS19_I09390	59.74	BAB1_1012	identical
BAbS19_I09400	57.82	BAB1_1014	identical
BAbS19_I09410	55.72	BAB1_1015	identical
BAbS19_I09420	56.53	BAB1_1016	identical
BAbS19_I09430	59.61	BAB1_1017	identical
BAbS19_I09440	59.33	BAB1_1019	identical
BAbS19_I09450	54.22	BAB1_1020	identical
BAbS19_I09460	57.51	BAB1_1021	identical
BAbS19_I09470	58.49	BAB1_1022	identical
BAbS19_I09480	55.46	BAB1_1023	identical
BAbS19_I09490	53.69	BAB1_1024	identical
BAbS19_I09500	60.49	BAB1_1025	identical
BAbS19_I09510	61.46	BAB1_1026	identical
BAbS19_I09520	57.45	BAB1_1027	identical
BAbS19_I09530	50.88	BAB1_1028	identical
BAbS19_I09540	57.37	no match	identical
BAbS19_I09550	59.59	BAB1_1029	identical
BAbS19_I09560	55.7	BAB1_1030	identical
BAbS19_I09580	53.85	BAB1_1032	identical
BAbS19_I09590	56.85	BAB1_1033	identical
BAbS19_I09600	57.28	BAB1_1034	identical
BAbS19_I09610	57.1	BAB1_1035	identical
BAbS19_I09620	59.66	BAB1_1036	identical
BAbS19_I09630	57.7	BAB1_1037	identical
BAbS19_I09640	55.92	BAB1_1038	identical
BAbS19_I09650	56.25	BAB1_1039	identical
BAbS19_I09660	55.52	BAB1_1040	identical
BAbS19_I09670	54.92	BAB1_1041	identical
BAbS19_I09680	59.67	BAB1_1043	identical
BAbS19_I09690	48.61	BAB1_1044	identical
BAbS19_I09700	60.8	BAB1_1045	identical
BAbS19_I09710	55.86	no match	identical
BAbS19_I09720	56.52	BAB1_1048	identical
BAbS19_I09730	57.98	BAB1_1049	identical
BAbS19_I09740	52.78	BAB1_1050	identical
BAbS19_I09750	59.55	BAB1_1051	identical
BAbS19_I09760	56.93	BAB1_1052	identical
BAbS19_I09770	59.5	BAB1_1053	identical
BAbS19_I09780	58.59	BAB1_1054	identical
BAbS19_I09790	54.09	BAB1_1055	identical
BAbS19_I09800	52.28	BAB1_1056	identical
BAbS19_I09810	60.3	BAB1_1058	identical
BAbS19_I09820	58.69	no match	identical
BAbS19_I09830	56.97	BAB1_1060	identical
BAbS19_I09840	55.56	BAB1_1061	identical
BAbS19_I09850	51.18	BAB1_1062	identical
BAbS19_I09860	57.49	BAB1_1063	identical
BAbS19_I09870	59.51	BAB1_1065	identical
BAbS19_I09880	57.17	BAB1_1066 # BAB1_1067	identical
BAbS19_I09890	59.34	BAB1_1068	identical
BAbS19_I09900	57.44	BAB1_1069	identical
BAbS19_I09910	59	BAB1_1070	identical
BAbS19_I09920	50.67	BAB1_1071	identical
BAbS19_I09930	53.94	no match	identical
BAbS19_I09940	61.97	BAB1_1072	identical
BAbS19_I09950	58.11	BAB1_1073	identical
BAbS19_I09960	55.91	BAB1_1074	identical
BAbS19_I09970	58.25	BAB1_1075	identical
BAbS19_I09980	55.17	BAB1_1076	identical
BAbS19_I09990	55.33	BAB1_1077	identical
BAbS19_I10020	56.76	no match	identical
BAbS19_I10080	55.28	BAB1_1086	identical
BAbS19_I10090	53.97	BAB1_1088	identical
BAbS19_I10100	53.45	BAB1_1089	identical
BAbS19_I10110	56.37	BAB1_1090	identical
BAbS19_I10120	58.12	BAB1_1091	identical
BAbS19_I10130	57.67	BAB1_1092	identical
BAbS19_I10140	56.45	BAB1_1093	identical
BAbS19_I10150	58.54	BAB1_1094	identical
BAbS19_I10160	59.68	BAB1_1095	identical
BAbS19_I10170	57.37	BAB1_1096	identical
BAbS19_I10180	57.01	BAB1_1097	identical
BAbS19_I10190	57.38	BAB1_1098	identical
BAbS19_I10200	59.39	BAB1_1099	identical
BAbS19_I10210	53.82	BAB1_1100	identical
BAbS19_I10220	53.58	BAB1_1101	identical
BAbS19_I10230	54.66	no match	identical
BAbS19_I10240	58.25	BAB1_1104	identical
BAbS19_I10250	54.31	BAB1_1106	identical
BAbS19_I10280	56.79	BAB1_1109	identical
BAbS19_I10290	59.15	BAB1_1110	identical
BAbS19_I10300	59.55	BAB1_1111	identical
BAbS19_I10310	57.38	BAB1_1112	identical
BAbS19_I10320	57.28	BAB1_1113	identical
BAbS19_I10330	54.14	BAB1_1114	identical
BAbS19_I10340	58.99	BAB1_1115	identical
BAbS19_I10350	58.42	BAB1_1116	identical
BAbS19_I10360	59.57	BAB1_1117	identical
BAbS19_I10370	55.84	BAB1_1118	identical
BAbS19_I10380	55.76	BAB1_1119	identical
BAbS19_I10390	55	BAB1_1120	identical
BAbS19_I10400	58.93	BAB1_1121	identical
BAbS19_I10410	56.67	BAB1_1122	identical
BAbS19_I10420	55.82	BAB1_1123	identical
BAbS19_I10430	54.99	BAB1_1124	identical
BAbS19_I10440	44.28	BAB1_1125	identical
BAbS19_I10450	56.41	BAB1_1126	identical
BAbS19_I10460	58.36	BAB1_1128	identical
BAbS19_I10470	60.51	BAB1_1129	identical
BAbS19_I10480	56.79	BAB1_1130	identical
BAbS19_I10490	55	no match	identical
BAbS19_I10510	56.51	BAB1_1132	identical
BAbS19_I10520	59.55	BAB1_1133	identical
BAbS19_I10530	45.57	BAB1_1134	identical
BAbS19_I10540	51.34	no match	identical
BAbS19_I10550	56.28	BAB1_1137	identical
BAbS19_I10560	60.21	BAB1_1138	identical
BAbS19_I10570	57.47	BAB1_1139	identical
BAbS19_I10580	59.42	BAB1_1140	identical
BAbS19_I10590	59.67	BAB1_1141	identical
BAbS19_I10600	58.68	BAB1_1142	identical
BAbS19_I10610	58.18	BAB1_1143	identical
BAbS19_I10620	59.24	BAB1_1144	identical
BAbS19_I10640	53.16	BAB1_1146	identical
BAbS19_I10650	56.45	BAB1_1147	identical
BAbS19_I10660	64.65	BAB1_1148	identical
BAbS19_I10670	58.95	BAB1_1149	identical
BAbS19_I10680	59.67	BAB1_1150	identical
BAbS19_I10700	55.91	BAB1_1152	identical
BAbS19_I10710	49.7	BAB1_1153	identical
BAbS19_I10720	49.66	BAB1_1154	identical
BAbS19_I10730	57.51	BAB1_1155	identical
BAbS19_I10740	57.07	BAB1_1156	identical
BAbS19_I10760	57.29	BAB1_1159	identical
BAbS19_I10770	63.53	BAB1_1160	identical
BAbS19_I10780	59.61	BAB1_1161	identical
BAbS19_I10790	59.25	BAB1_1162	identical
BAbS19_I10800	61.76	BAB1_1163	identical
BAbS19_I10810	58.24	BAB1_1164	identical
BAbS19_I10820	60.44	BAB1_1165	identical
BAbS19_I10830	60.82	BAB1_1166	identical
BAbS19_I10840	57.68	BAB1_1167	identical
BAbS19_I10850	57.49	BAB1_1168	identical
BAbS19_I10860	53.67	no match	identical
BAbS19_I10870	60.06	BAB1_1169	identical
BAbS19_I10880	57.15	BAB1_1170	identical
BAbS19_I10890	57.83	BAB1_1171	identical
BAbS19_I10900	58.36	BAB1_1172	identical
BAbS19_I10910	57.47	BAB1_1173	identical
BAbS19_I10920	53.8	BAB1_1174	identical
BAbS19_I10930	58.43	BAB1_1175	identical
BAbS19_I10940	54.43	BAB1_1176	identical
BAbS19_I10950	57.11	BAB1_1178	identical
BAbS19_I10960	58.67	BAB1_1179	identical
BAbS19_I10970	59.74	BAB1_1180	identical
BAbS19_I10980	57.93	BAB1_1181	identical
BAbS19_I10990	57.64	BAB1_1182	identical
BAbS19_I11000	59.48	BAB1_1183	identical
BAbS19_I11010	59.27	BAB1_1184	identical
BAbS19_I11020	52.72	no match	identical
BAbS19_I11030	53.86	BAB1_1186	identical
BAbS19_I11040	58.06	BAB1_1187	identical
BAbS19_I11070	54.88	BAB1_1189	identical
BAbS19_I11080	53.43	BAB1_1190	identical
BAbS19_I11090	57.62	BAB1_1191	identical
BAbS19_I11100	52.42	BAB1_1192	identical
BAbS19_I11110	61.54	BAB1_1193	identical
BAbS19_I11120	61.22	BAB1_1194	identical
BAbS19_I11130	58.68	BAB1_1195	identical
BAbS19_I11140	59.77	no match	identical
BAbS19_I11150	50.79	BAB1_1198	identical
BAbS19_I11160	55.97	BAB1_1199	identical
BAbS19_I11170	58.02	BAB1_1200	identical
BAbS19_I11180	56.07	BAB1_1201	identical
BAbS19_I11190	54.64	BAB1_1202	identical
BAbS19_I11200	57.76	BAB1_1204	identical
BAbS19_I11210	55.56	no match	identical
BAbS19_I11220	57.69	BAB1_1206	identical
BAbS19_I11230	59.32	BAB1_1208	identical
BAbS19_I11240	54.14	no match	identical
BAbS19_I11250	58.17	BAB1_1209	identical
BAbS19_I11260	58.71	BAB1_1210	identical
BAbS19_I11270	59.63	BAB1_1211	identical
BAbS19_I11280	58.91	BAB1_1212	identical
BAbS19_I11300	57.15	BAB1_1214	identical
BAbS19_I11310	51.7	BAB1_1215	identical
BAbS19_I11330	57.55	BAB1_1217	identical
BAbS19_I11340	57.52	BAB1_1218	identical
BAbS19_I11350	58.29	BAB1_1219	identical
BAbS19_I11360	57.91	BAB1_1220	identical
BAbS19_I11370	57.2	BAB1_1221	identical
BAbS19_I11380	58.09	BAB1_1222	identical
BAbS19_I11390	58.77	BAB1_1223	identical
BAbS19_I11400	57	BAB1_1224	identical
BAbS19_I11410	49.21	BAB1_1225	identical
BAbS19_I11420	59.13	BAB1_1226	identical
BAbS19_I11430	55.9	BAB1_1227	identical
BAbS19_I11440	59.89	BAB1_1228	identical
BAbS19_I11450	59.16	BAB1_1229	identical
BAbS19_I11460	58.04	BAB1_1230	identical
BAbS19_I11470	57.1	BAB1_1231	identical
BAbS19_I11480	62.05	BAB1_1232	identical
BAbS19_I11490	56.91	BAB1_1233	identical
BAbS19_I11500	58.8	BAB1_1234	identical
BAbS19_I11510	55.11	BAB1_1235	identical
BAbS19_I11520	59.45	BAB1_1236	identical
BAbS19_I11530	58.59	BAB1_1237	identical
BAbS19_I11540	60.43	BAB1_1238	identical
BAbS19_I11550	61.98	BAB1_1239	identical
BAbS19_I11560	57.49	BAB1_1240	identical
BAbS19_I11570	57.89	BAB1_1241	identical
BAbS19_I11600	57.05	BAB1_1244	identical
BAbS19_I11610	54.74	BAB1_1245	identical
BAbS19_I11620	53.5	BAB1_1246	identical
BAbS19_I11630	58.21	BAB1_1247	identical
BAbS19_I11640	58.21	BAB1_1248	identical
BAbS19_I11650	57.38	BAB1_1249	identical
BAbS19_I11660	58.72	BAB1_1250	identical
BAbS19_I11670	54.48	BAB1_1251	identical
BAbS19_I11680	59.83	BAB1_1252	identical
BAbS19_I11690	57.14	BAB1_1253	identical
BAbS19_I11700	60.55	BAB1_1254	identical
BAbS19_I11710	58.54	BAB1_1255	identical
BAbS19_I11720	57.28	BAB1_1256	identical
BAbS19_I11730	58.84	BAB1_1257	identical
BAbS19_I11740	56.98	BAB1_1258	identical
BAbS19_I11750	57.32	BAB1_1259	identical
BAbS19_I11760	57.26	BAB1_1260	identical
BAbS19_I11780	57.93	BAB1_1263	identical
BAbS19_I11790	57.72	BAB1_1264	identical
BAbS19_I11800	59.2	BAB1_1265	identical
BAbS19_I11810	58.57	BAB1_1266	identical
BAbS19_I11820	56.98	BAB1_1267	identical
BAbS19_I11830	58.04	BAB1_1268	identical
BAbS19_I11840	52.27	BAB1_1269	identical
BAbS19_I11850	53.73	BAB1_1270	identical
BAbS19_I11860	58.93	BAB1_1271	identical
BAbS19_I11870	61.09	no match	identical
BAbS19_I11880	54.63	BAB1_1274	identical
BAbS19_I11890	57.61	BAB1_1275	identical
BAbS19_I11900	58.57	BAB1_1277	identical
BAbS19_I11910	59.41	BAB1_1278	identical
BAbS19_I11920	57.58	BAB1_1279	identical
BAbS19_I11930	48.31	BAB1_1280	identical
BAbS19_I11940	57.94	BAB1_1281	identical
BAbS19_I11950	50.41	no match	identical
BAbS19_I11960	58.24	BAB1_1282	identical
BAbS19_I11970	54.38	BAB1_1283	identical
BAbS19_I11980	59.79	BAB1_1284	identical
BAbS19_I11990	44.2	BAB1_1285	identical
BAbS19_I12000	58.5	BAB1_1286	identical
BAbS19_I12030	61.57	BAB1_1290	identical
BAbS19_I12040	53.58	BAB1_1291	identical
BAbS19_I12050	45.39	no match	identical
BAbS19_I12060	61.09	BAB1_1292	identical
BAbS19_I12070	58.86	BAB1_1293	identical
BAbS19_I12080	58.56	BAB1_1294	identical
BAbS19_I12090	62.36	BAB1_1295	identical
BAbS19_I12100	57.58	BAB1_1296	identical
BAbS19_I12110	55.79	BAB1_1297	identical
BAbS19_I12120	58.02	BAB1_1299	identical
BAbS19_I12130	57.37	BAB1_1300	identical
BAbS19_I12140	60.4	BAB1_1301	identical
BAbS19_I12150	58.22	BAB1_1302	identical
BAbS19_I12160	61.28	BAB1_1303	identical
BAbS19_I12170	58.95	BAB1_1304	identical
BAbS19_I12180	62.04	BAB1_1305	identical
BAbS19_I12190	58.78	BAB1_1306	identical
BAbS19_I12200	60.65	BAB1_1307	identical
BAbS19_I12210	61.97	BAB1_1308	identical
BAbS19_I12220	51.85	BAB1_1309	identical
BAbS19_I12230	55.99	no match	identical
BAbS19_I12260	58.84	BAB1_1313	identical
BAbS19_I12270	59.24	BAB1_1314	identical
BAbS19_I12280	60.66	BAB1_1315	identical
BAbS19_I12290	60.49	BAB1_1316	identical
BAbS19_I12300	61.89	BAB1_1317	identical
BAbS19_I12310	60.07	BAB1_1318	identical
BAbS19_I12320	61.31	BAB1_1319	identical
BAbS19_I12330	58.23	BAB1_1320	identical
BAbS19_I12340	58.59	BAB1_1321	identical
BAbS19_I12350	54.81	BAB1_1322	identical
BAbS19_I12360	59.41	BAB1_1323	identical
BAbS19_I12370	59.82	BAB1_1324	identical
BAbS19_I12380	56.03	BAB1_1325	identical
BAbS19_I12390	62.39	BAB1_1326	identical
BAbS19_I12400	57.43	BAB1_1327	identical
BAbS19_I12410	60.15	BAB1_1328	identical
BAbS19_I12420	60.96	no match	identical
BAbS19_I12430	57.14	BAB1_1330	identical
BAbS19_I12440	60.67	BAB1_1331	identical
BAbS19_I12450	57.69	BAB1_1333	identical
BAbS19_I12460	60.61	BAB1_1334	identical
BAbS19_I12470	45.83	BAB1_1335	identical
BAbS19_I12480	58.78	BAB1_1337	identical
BAbS19_I12490	57.16	BAB1_1338	identical
BAbS19_I12520	55.33	BAB1_1341	identical
BAbS19_I12530	57.35	BAB1_1342	identical
BAbS19_I12540	59.62	BAB1_1343	identical
BAbS19_I12560	59.46	BAB1_1345	identical
BAbS19_I12570	55.35	BAB1_1346	identical
BAbS19_I12600	56.32	BAB1_1349	identical
BAbS19_I12610	59.02	BAB1_1350	identical
BAbS19_I12620	55.52	BAB1_1351	identical
BAbS19_I12630	51.97	BAB1_1352	identical
BAbS19_I12640	58.95	BAB1_1353	identical
BAbS19_I12660	53.52	BAB1_1355	identical
BAbS19_I12670	54.37	BAB1_1356	identical
BAbS19_I12680	59.26	BAB1_1357	identical
BAbS19_I12690	58.46	BAB1_1358	identical
BAbS19_I12720	59.68	BAB1_1362	identical
BAbS19_I12730	57.44	BAB1_1363	identical
BAbS19_I12740	62.16	BAB1_1364	identical
BAbS19_I12750	62.08	BAB1_1365	identical
BAbS19_I12760	60.48	BAB1_1366	identical
BAbS19_I12770	56.58	BAB1_1367	identical
BAbS19_I12780	57.42	BAB1_1368	identical
BAbS19_I12790	56.05	no match	identical
BAbS19_I12800	58.9	no match	identical
BAbS19_I12810	60.96	BAB1_1371	identical
BAbS19_I12820	52.22	BAB1_1372	identical
BAbS19_I12830	54.96	BAB1_1374	identical
BAbS19_I12840	57.1	BAB1_1376	identical
BAbS19_I12850	58.13	BAB1_1377	identical
BAbS19_I12860	59.23	BAB1_1378	identical
BAbS19_I12870	58.55	no match	identical
BAbS19_I12880	58.88	BAB1_1380	identical
BAbS19_I12890	56.34	BAB1_1381	identical
BAbS19_I12900	57.92	BAB1_1382	identical
BAbS19_I12910	60.19	BAB1_1383	identical
BAbS19_I12920	57.44	BAB1_1384	identical
BAbS19_I12930	61.64	BAB1_1385	identical
BAbS19_I12940	62.52	BAB1_1386	identical
BAbS19_I12950	60.13	BAB1_1387	identical
BAbS19_I12960	57.22	BAB1_1388	identical
BAbS19_I12970	57.81	BAB1_1389	identical
BAbS19_I12980	56.41	BAB1_1390	identical
BAbS19_I12990	56.34	BAB1_1391	identical
BAbS19_I13000	51.95	BAB1_1392	identical
BAbS19_I13010	47.83	BAB1_1393	identical
BAbS19_I13020	57.82	no match	identical
BAbS19_I13030	58.88	BAB1_1394	identical
BAbS19_I13040	55.68	BAB1_1395	identical
BAbS19_I13050	57.35	BAB1_1396	identical
BAbS19_I13060	57.26	BAB1_1397	identical
BAbS19_I13070	58.24	BAB1_1399	identical
BAbS19_I13080	59.97	BAB1_1400	identical
BAbS19_I13090	46.81	BAB1_1401	identical
BAbS19_I13100	58.28	BAB1_1402	identical
BAbS19_I13110	57.23	BAB1_1403	identical
BAbS19_I13120	59.65	BAB1_1404	identical
BAbS19_I13130	53.13	BAB1_1405	identical
BAbS19_I13140	57.84	BAB1_1406	identical
BAbS19_I13150	58.46	BAB1_1407	identical
BAbS19_I13160	58.5	BAB1_1408	identical
BAbS19_I13170	59.59	BAB1_1409	identical
BAbS19_I13180	60.56	BAB1_1410	identical
BAbS19_I13190	59.22	BAB1_1411	identical
BAbS19_I13200	58.67	BAB1_1413	identical
BAbS19_I13210	60.22	BAB1_1414	identical
BAbS19_I13220	60.13	BAB1_1415	identical
BAbS19_I13230	58.94	BAB1_1416	identical
BAbS19_I13240	57.8	BAB1_1417	identical
BAbS19_I13250	55.47	BAB1_1418	identical
BAbS19_I13260	57.69	BAB1_1419	identical
BAbS19_I13270	60.06	BAB1_1420	identical
BAbS19_I13280	51.7	BAB1_1421	identical
BAbS19_I13290	56.62	BAB1_1422	identical
BAbS19_I13300	54.21	BAB1_1423	identical
BAbS19_I13310	54.24	BAB1_1424	identical
BAbS19_I13320	52.24	BAB1_1425	identical
BAbS19_I13330	58.72	BAB1_1426	identical
BAbS19_I13340	60.12	BAB1_1427	identical
BAbS19_I13350	48.23	BAB1_1428	identical
BAbS19_I13360	59.7	BAB1_1429	identical
BAbS19_I13370	60.78	BAB1_1430	identical
BAbS19_I13380	60.35	BAB1_1431	identical
BAbS19_I13390	59.37	BAB1_1432	identical
BAbS19_I13400	54.22	BAB1_1433	identical
BAbS19_I13410	58.77	BAB1_1434	identical
BAbS19_I13420	55.61	BAB1_1435	identical
BAbS19_I13430	58.28	BAB1_1436	identical
BAbS19_I13440	59.44	BAB1_1437	identical
BAbS19_I13450	56.88	BAB1_1438	identical
BAbS19_I13460	59.95	BAB1_1439	identical
BAbS19_I13470	62.26	BAB1_1440	identical
BAbS19_I13480	56.48	BAB1_1441	identical
BAbS19_I13490	56.33	BAB1_1443	identical
BAbS19_I13510	60.62	BAB1_1445	identical
BAbS19_I13520	58.44	BAB1_1446	identical
BAbS19_I13530	55.45	BAB1_1447	identical
BAbS19_I13540	61.09	BAB1_1448	identical
BAbS19_I13550	61.09	BAB1_1449	identical
BAbS19_I13560	61.84	BAB1_1450	identical
BAbS19_I13570	59.15	BAB1_1451	identical
BAbS19_I13580	60.54	BAB1_1452	identical
BAbS19_I13590	57.25	BAB1_1453	identical
BAbS19_I13600	58.99	BAB1_1454	identical
BAbS19_I13610	59.92	BAB1_1455	identical
BAbS19_I13620	59.38	BAB1_1456	identical
BAbS19_I13630	56.52	BAB1_1457	identical
BAbS19_I13640	61.38	BAB1_1458	identical
BAbS19_I13650	58.72	BAB1_1460	identical
BAbS19_I13660	55.19	BAB1_1461	identical
BAbS19_I13670	55.39	BAB1_1462	identical
BAbS19_I13680	54.29	BAB1_1463	identical
BAbS19_I13690	59.01	BAB1_1464	identical
BAbS19_I13700	59.47	BAB1_1465	identical
BAbS19_I13710	58.56	BAB1_1466	identical
BAbS19_I13720	58.87	BAB1_1467	identical
BAbS19_I13730	57.68	BAB1_1468	identical
BAbS19_I13740	60.14	BAB1_1469	identical
BAbS19_I13750	55.4	BAB1_1470	identical
BAbS19_I13760	56.82	BAB1_1471	identical
BAbS19_I13780	56.12	BAB1_1474	identical
BAbS19_I13790	58.33	BAB1_1475	identical
BAbS19_I13800	57.14	BAB1_1476	identical
BAbS19_I13810	52.85	no match	identical
BAbS19_I13840	57.13	BAB1_1481	identical
BAbS19_I13850	59.25	BAB1_1482	identical
BAbS19_I13860	55.86	BAB1_1483	identical
BAbS19_I13870	56.19	BAB1_1484	identical
BAbS19_I13880	54.61	BAB1_1485	identical
BAbS19_I13890	53.93	BAB1_1486	identical
BAbS19_I13900	54.35	BAB1_1488	identical
BAbS19_I13910	54.35	BAB1_1489	identical
BAbS19_I13920	60.17	BAB1_1491	identical
BAbS19_I13930	56.89	BAB1_1492	identical
BAbS19_I13940	55.56	BAB1_1493	identical
BAbS19_I13950	55.78	BAB1_1494	identical
BAbS19_I13960	58.84	BAB1_1495	identical
BAbS19_I13970	54.47	BAB1_1496	identical
BAbS19_I13980	54.98	BAB1_1497	identical
BAbS19_I13990	56.91	BAB1_1498	identical
BAbS19_I14000	61.64	BAB1_1499	identical
BAbS19_I14010	59.39	BAB1_1500	identical
BAbS19_I14020	57.62	BAB1_1501	identical
BAbS19_I14030	60.7	BAB1_1502	identical
BAbS19_I14040	61.06	BAB1_1504	identical
BAbS19_I14050	54.14	BAB1_1505	identical
BAbS19_I14060	56.81	no match	identical
BAbS19_I14070	60.42	BAB1_1508	identical
BAbS19_I14080	58.47	BAB1_1510	identical
BAbS19_I14090	56.01	BAB1_1511	identical
BAbS19_I14100	58.57	BAB1_1512	identical
BAbS19_I14110	57.03	BAB1_1513	identical
BAbS19_I14120	58.27	BAB1_1514	identical
BAbS19_I14130	42.59	BAB1_1516	identical
BAbS19_I14140	57.17	BAB1_1517	identical
BAbS19_I14150	59.49	BAB1_1518	identical
BAbS19_I14160	57.42	BAB1_1519	identical
BAbS19_I14170	58.81	BAB1_1521	identical
BAbS19_I14180	57.57	BAB1_1522	identical
BAbS19_I14190	55.06	BAB1_1523	identical
BAbS19_I14200	54.83	BAB1_1524	identical
BAbS19_I14210	48.92	no match	identical
BAbS19_I14220	60.75	BAB1_1525	identical
BAbS19_I14230	53.28	BAB1_1526	identical
BAbS19_I14240	59.87	BAB1_1527	identical
BAbS19_I14250	57.95	BAB1_1528	identical
BAbS19_I14260	58.47	BAB1_1529	identical
BAbS19_I14280	60.45	BAB1_1531	identical
BAbS19_I14290	52.31	BAB1_1532	identical
BAbS19_I14300	50	no match	identical
BAbS19_I14310	61.79	BAB1_1533	identical
BAbS19_I14320	58.3	BAB1_1534	identical
BAbS19_I14330	58.16	BAB1_1535	identical
BAbS19_I14340	46.46	BAB1_1536	identical
BAbS19_I14350	53.37	BAB1_1537	identical
BAbS19_I14360	59.32	BAB1_1538	identical
BAbS19_I14370	59.52	BAB1_1539	identical
BAbS19_I14380	43.33	BAB1_1540	identical
BAbS19_I14390	54.89	BAB1_1541	identical
BAbS19_I14400	56.69	BAB1_1542	identical
BAbS19_I14410	56.39	BAB1_1543	identical
BAbS19_I14420	51.77	no match	identical
BAbS19_I14430	61.58	BAB1_1544	identical
BAbS19_I14440	58.87	BAB1_1545	identical
BAbS19_I14450	58.15	BAB1_1546	identical
BAbS19_I14460	57.81	BAB1_1547	identical
BAbS19_I14470	59.12	BAB1_1548	identical
BAbS19_I14480	59.59	BAB1_1549	identical
BAbS19_I14490	62.16	BAB1_1550	identical
BAbS19_I14500	58.33	BAB1_1551	identical
BAbS19_I14510	57.93	BAB1_1552	identical
BAbS19_I14520	59.33	BAB1_1553	identical
BAbS19_I14530	58.33	BAB1_1554	identical
BAbS19_I14540	58.18	BAB1_1555	identical
BAbS19_I14550	57.14	BAB1_1556	identical
BAbS19_I14560	57.16	BAB1_1557	identical
BAbS19_I14570	57.04	BAB1_1558	identical
BAbS19_I14580	58.16	BAB1_1559	identical
BAbS19_I14590	58.43	BAB1_1560	identical
BAbS19_I14600	57.51	BAB1_1561	identical
BAbS19_I14610	58.33	BAB1_1562	identical
BAbS19_I14620	57.51	BAB1_1563	identical
BAbS19_I14630	62.07	BAB1_1565	identical
BAbS19_I14640	57.79	BAB1_1566	identical
BAbS19_I14650	60.81	BAB1_1567	identical
BAbS19_I14660	49.12	no match	identical
BAbS19_I14670	58.04	no match	identical
BAbS19_I14680	59.28	BAB1_1570	identical
BAbS19_I14690	61.06	BAB1_1571	identical
BAbS19_I14700	60.21	BAB1_1572	identical
BAbS19_I14710	62	BAB1_1573	identical
BAbS19_I14720	63.34	BAB1_1574	identical
BAbS19_I14730	61.57	BAB1_1575	identical
BAbS19_I14740	60.53	BAB1_1576	identical
BAbS19_I14750	63.12	BAB1_1577	identical
BAbS19_I14760	56.81	BAB1_1578	identical
BAbS19_I14770	56.29	BAB1_1579	identical
BAbS19_I14780	53.51	BAB1_1580	identical
BAbS19_I14790	59.76	BAB1_1581	identical
BAbS19_I14800	57.41	BAB1_1583	identical
BAbS19_I14810	58.53	no match	identical
BAbS19_I14820	46.1	BAB1_1585	identical
BAbS19_I14830	58.33	BAB1_1586	identical
BAbS19_I14840	52.91	no match	identical
BAbS19_I14850	55.19	BAB1_1587	identical
BAbS19_I14860	59.11	BAB1_1588	identical
BAbS19_I14870	61.02	BAB1_1589	identical
BAbS19_I14880	62.94	BAB1_1590	identical
BAbS19_I14890	57.98	BAB1_1591	identical
BAbS19_I14900	52.08	BAB1_1592	identical
BAbS19_I14910	56.04	BAB1_1593	identical
BAbS19_I14920	56.51	BAB1_1594	identical
BAbS19_I14930	58.83	BAB1_1595	identical
BAbS19_I14940	56.89	BAB1_1596	identical
BAbS19_I14950	56.42	BAB1_1597	identical
BAbS19_I14960	58.42	BAB1_1598	identical
BAbS19_I14970	55.56	BAB1_1599	identical
BAbS19_I15010	47.7	BAB1_1605	identical
BAbS19_I15020	55.46	BAB1_1606	identical
BAbS19_I15030	59.73	BAB1_1607	identical
BAbS19_I15040	47.83	BAB1_1608	identical
BAbS19_I15050	57.97	BAB1_1609	identical
BAbS19_I15060	56.12	BAB1_1610	identical
BAbS19_I15070	55.51	BAB1_1611	identical
BAbS19_I15080	55.95	BAB1_1612	identical
BAbS19_I15090	58.1	BAB1_1613	identical
BAbS19_I15100	54.94	BAB1_1614	identical
BAbS19_I15110	56.74	BAB1_1615	identical
BAbS19_I15120	56.62	BAB1_1616	identical
BAbS19_I15130	56.64	BAB1_1617	identical
BAbS19_I15140	50.45	BAB1_1620	identical
BAbS19_I15150	60.59	BAB1_1621	identical
BAbS19_I15160	59.96	BAB1_1623	identical
BAbS19_I15170	58.88	BAB1_1624	identical
BAbS19_I15210	54.8	BAB1_1628	identical
BAbS19_I15220	62.41	no match	identical
BAbS19_I15230	61.36	no match	identical
BAbS19_I15240	60.54	BAB1_1631	identical
BAbS19_I15250	56.12	BAB1_1632	identical
BAbS19_I15260	55.56	BAB1_1633	identical
BAbS19_I15270	59.51	BAB1_1634	identical
BAbS19_I15280	57.11	BAB1_1635	identical
BAbS19_I15310	57.72	BAB1_1638	identical
BAbS19_I15320	54.59	BAB1_1639	identical
BAbS19_I15330	54.16	BAB1_1640	identical
BAbS19_I15340	47.06	no match	identical
BAbS19_I15350	49.65	BAB1_1641	identical
BAbS19_I15360	56.33	no match	identical
BAbS19_I15390	57.48	no match	identical
BAbS19_I15400	57.1	no match	identical
BAbS19_I15410	55.68	BAB1_1647	identical
BAbS19_I15420	55.25	BAB1_1648	identical
BAbS19_I15430	57.31	BAB1_1649	identical
BAbS19_I15440	55.85	BAB1_1650	identical
BAbS19_I15450	53.46	BAB1_1652	identical
BAbS19_I15460	52.71	no match	identical
BAbS19_I15470	56.52	BAB1_1653	identical
BAbS19_I15480	45.1	no match	identical
BAbS19_I15490	58.88	BAB1_1654	identical
BAbS19_I15500	58.82	BAB1_1655	identical
BAbS19_I15510	56.87	BAB1_1656	identical
BAbS19_I15520	57.8	BAB1_1657	identical
BAbS19_I15530	56.54	BAB1_1658	identical
BAbS19_I15540	63.66	BAB1_1661	identical
BAbS19_I15550	58.56	BAB1_1662	identical
BAbS19_I15560	58.34	BAB1_1663	identical
BAbS19_I15570	55.83	BAB1_1664	identical
BAbS19_I15580	58.44	BAB1_1665	identical
BAbS19_I15590	59.7	BAB1_1666	identical
BAbS19_I15600	58.28	BAB1_1667	identical
BAbS19_I15610	51.73	BAB1_1668	identical
BAbS19_I15620	56.65	BAB1_1669	identical
BAbS19_I15630	48.48	BAB1_1670	identical
BAbS19_I15640	56.23	BAB1_1671	identical
BAbS19_I15650	60.56	BAB1_1672	identical
BAbS19_I15670	57.87	BAB1_1674	identical
BAbS19_I15680	57.63	BAB1_1675	identical
BAbS19_I15690	57.3	BAB1_1676	identical
BAbS19_I15700	57.86	BAB1_1678	identical
BAbS19_I15710	63.64	BAB1_1679	identical
BAbS19_I15720	60.2	BAB1_1680	identical
BAbS19_I15730	61.74	BAB1_1681	identical
BAbS19_I15740	54.88	no match	identical
BAbS19_I15750	58.93	BAB1_1683	identical
BAbS19_I15760	59.92	BAB1_1684	identical
BAbS19_I15770	58.92	BAB1_1685	identical
BAbS19_I15780	61.18	BAB1_1687	identical
BAbS19_I15790	56.48	BAB1_1688	identical
BAbS19_I15800	53.24	BAB1_1689	identical
BAbS19_I15810	60.66	BAB1_1690	identical
BAbS19_I15820	59.35	BAB1_1691	identical
BAbS19_I15830	59.87	BAB1_1692	identical
BAbS19_I15840	60.52	BAB1_1693	identical
BAbS19_I15850	54.63	BAB1_1694	identical
BAbS19_I15860	59.25	BAB1_1695	identical
BAbS19_I15870	56.11	BAB1_1696	identical
BAbS19_I15880	57.37	BAB1_1697	identical
BAbS19_I15890	58.67	BAB1_1699	identical
BAbS19_I15900	59.14	BAB1_1700	identical
BAbS19_I15910	56	BAB1_1701	identical
BAbS19_I15920	58.12	BAB1_1702	identical
BAbS19_I15930	58.24	BAB1_1703	identical
BAbS19_I15940	61.1	BAB1_1704	identical
BAbS19_I15950	60	BAB1_1705	identical
BAbS19_I15960	62.52	BAB1_1707	identical
BAbS19_I15970	59.08	BAB1_1709	identical
BAbS19_I15980	61.09	BAB1_1710	identical
BAbS19_I15990	54.97	BAB1_1711	identical
BAbS19_I16000	59.07	BAB1_1712	identical
BAbS19_I16010	56.44	BAB1_1713	identical
BAbS19_I16020	61.58	BAB1_1714	identical
BAbS19_I16030	61.33	BAB1_1715	identical
BAbS19_I16040	59.77	BAB1_1716	identical
BAbS19_I16050	59.31	BAB1_1717	identical
BAbS19_I16060	58.35	BAB1_1718	identical
BAbS19_I16070	61.71	BAB1_1719	identical
BAbS19_I16080	62.01	BAB1_1720	identical
BAbS19_I16090	56.51	BAB1_1722	identical
BAbS19_I16100	61.74	BAB1_1723	identical
BAbS19_I16110	42.34	BAB1_1724	identical
BAbS19_I16120	60.86	BAB1_1725	identical
BAbS19_I16130	59.59	BAB1_1726	identical
BAbS19_I16140	59.48	BAB1_1727	identical
BAbS19_I16150	59.01	BAB1_1728	identical
BAbS19_I16160	57.3	BAB1_1729	identical
BAbS19_I16170	64.07	BAB1_1730	identical
BAbS19_I16180	62.67	BAB1_1731	identical
BAbS19_I16190	59.21	BAB1_1732	identical
BAbS19_I16200	56.32	BAB1_1733	identical
BAbS19_I16210	58.79	BAB1_1734	identical
BAbS19_I16220	62.14	BAB1_1735	identical
BAbS19_I16230	59.02	BAB1_1737	identical
BAbS19_I16240	57.18	BAB1_1738	identical
BAbS19_I16250	60.14	BAB1_1740	identical
BAbS19_I16260	58.53	BAB1_1741	identical
BAbS19_I16270	60.29	BAB1_1742	identical
BAbS19_I16280	56.97	BAB1_1743	identical
BAbS19_I16290	60.54	BAB1_1744	identical
BAbS19_I16300	58.25	BAB1_1745	identical
BAbS19_I16310	54.3	BAB1_1746	identical
BAbS19_I16320	61.25	BAB1_1747	identical
BAbS19_I16330	39.81	no match	identical
BAbS19_I16340	61.03	BAB1_1748	identical
BAbS19_I16350	59.13	BAB1_1749	identical
BAbS19_I16360	61.59	BAB1_1750	identical
BAbS19_I16370	56.77	BAB1_1751	identical
BAbS19_I16400	48.33	BAB1_1754	identical
BAbS19_I16410	49.51	BAB1_1756	identical
BAbS19_I16420	62.78	BAB1_1757	identical
BAbS19_I16430	60.06	BAB1_1758	identical
BAbS19_I16440	57.94	BAB1_1759	identical
BAbS19_I16450	57.67	BAB1_1760	identical
BAbS19_I16460	59.22	BAB1_1761	identical
BAbS19_I16470	53.46	BAB1_1762	identical
BAbS19_I16480	59.22	BAB1_1763	identical
BAbS19_I16490	50.19	BAB1_1765	identical
BAbS19_I16500	59.74	BAB1_1766	identical
BAbS19_I16520	56.16	BAB1_1769	identical
BAbS19_I16530	55.82	BAB1_1770	identical
BAbS19_I16540	60.74	BAB1_1771	identical
BAbS19_I16550	60.19	BAB1_1772	identical
BAbS19_I16560	61.34	BAB1_1773	identical
BAbS19_I16570	57.75	BAB1_1774	identical
BAbS19_I16580	58.85	BAB1_1775	identical
BAbS19_I16590	48.04	BAB1_1776	identical
BAbS19_I16600	55.38	BAB1_1777	identical
BAbS19_I16610	55.75	BAB1_1778	identical
BAbS19_I16620	50.94	BAB1_1779	identical
BAbS19_I16630	61.94	BAB1_1780	identical
BAbS19_I16640	61.58	BAB1_1781	identical
BAbS19_I16650	62.03	BAB1_1783	identical
BAbS19_I16660	52.38	BAB1_1783	identical
BAbS19_I16670	62.04	BAB1_1784	identical
BAbS19_I16680	54.44	BAB1_1785	identical
BAbS19_I16690	56.39	BAB1_1786	identical
BAbS19_I16700	63.44	BAB1_1787	identical
BAbS19_I16710	60.17	BAB1_1788	identical
BAbS19_I16720	57.2	BAB1_1789	identical
BAbS19_I16730	58.76	BAB1_1790	identical
BAbS19_I16740	58.79	BAB1_1791	identical
BAbS19_I16750	56.36	BAB1_1792	identical
BAbS19_I16760	55.11	BAB1_1794	identical
BAbS19_I16770	54.2	BAB1_1795	identical
BAbS19_I16780	57.43	BAB1_1796	identical
BAbS19_I16790	58.3	no match	identical
BAbS19_I16800	57.97	BAB1_1798	identical
BAbS19_I16810	57.25	BAB1_1799	identical
BAbS19_I16820	58.98	BAB1_1800	identical
BAbS19_I16830	60.41	BAB1_1801	identical
BAbS19_I16840	63.22	BAB1_1803	identical
BAbS19_I16850	57.31	BAB1_1804	identical
BAbS19_I16860	49.02	BAB1_1805	identical
BAbS19_I16870	57.84	BAB1_1806	identical
BAbS19_I16880	61.62	BAB1_1807	identical
BAbS19_I16890	56.66	BAB1_1808	identical
BAbS19_I16900	59.61	BAB1_1809	identical
BAbS19_I16910	58.29	BAB1_1810	identical
BAbS19_I16920	58.94	BAB1_1811	identical
BAbS19_I16930	62.72	BAB1_1812	identical
BAbS19_I16940	56.57	BAB1_1813	identical
BAbS19_I16950	59.11	BAB1_1814	identical
BAbS19_I16960	59.15	BAB1_1815	identical
BAbS19_I16970	61.38	BAB1_1816	identical
BAbS19_I16980	56.87	BAB1_1817	identical
BAbS19_I16990	54.17	BAB1_1818	identical
BAbS19_I17000	59.25	BAB1_1819	identical
BAbS19_I17010	60.73	BAB1_1820	identical
BAbS19_I17020	60.33	BAB1_1821	identical
BAbS19_I17030	62.8	BAB1_1822	identical
BAbS19_I17040	61.68	BAB1_1823	identical
BAbS19_I17050	61.47	BAB1_1824	identical
BAbS19_I17060	55.28	no match	identical
BAbS19_I17070	58.35	no match	identical
BAbS19_I17080	59.71	BAB1_1827	identical
BAbS19_I17090	58.1	BAB1_1828	identical
BAbS19_I17100	58.9	BAB1_1829	identical
BAbS19_I17110	55.93	BAB1_1830	identical
BAbS19_I17120	50.35	BAB1_1831	identical
BAbS19_I17130	62.22	BAB1_1832	identical
BAbS19_I17140	58.41	BAB1_1833	identical
BAbS19_I17150	60.18	BAB1_1834	identical
BAbS19_I17160	59.9	BAB1_1836	identical
BAbS19_I17180	61.87	BAB1_1838	identical
BAbS19_I17190	60.31	BAB1_1839	identical
BAbS19_I17200	60.32	BAB1_1840	identical
BAbS19_I17210	61.92	BAB1_1841	identical
BAbS19_I17220	60.16	BAB1_1842	identical
BAbS19_I17230	58.82	BAB1_1843	identical
BAbS19_I17240	60.15	BAB1_1844	identical
BAbS19_I17260	59.48	BAB1_1846	identical
BAbS19_I17270	57.11	BAB1_1847	identical
BAbS19_I17280	62.75	BAB1_1848	identical
BAbS19_I17290	56.99	BAB1_1849	identical
BAbS19_I17300	59.11	BAB1_1850	identical
BAbS19_I17310	61.14	BAB1_1851	identical
BAbS19_I17320	60.16	BAB1_1852	identical
BAbS19_I17330	59.36	BAB1_1853	identical
BAbS19_I17340	51.55	BAB1_1854	identical
BAbS19_I17350	57.17	BAB1_1855	identical
BAbS19_I17360	57.6	BAB1_1856	identical
BAbS19_I17370	57.78	BAB1_1857	identical
BAbS19_I17380	61.07	BAB1_1858	identical
BAbS19_I17390	49.77	BAB1_1859	identical
BAbS19_I17400	52.74	BAB1_1860	identical
BAbS19_I17410	51.85	BAB1_1861	identical
BAbS19_I17430	48.03	BAB1_1863	identical
BAbS19_I17440	50.35	BAB1_1864	identical
BAbS19_I17450	50.22	BAB1_1865	identical
BAbS19_I17460	45.1	no match	identical
BAbS19_I17470	59	BAB1_1866	identical
BAbS19_I17480	58.86	BAB1_1867	identical
BAbS19_I17490	58.78	BAB1_1868	identical
BAbS19_I17500	62.85	BAB1_1869	identical
BAbS19_I17510	58.11	BAB1_1871	identical
BAbS19_I17520	60.09	BAB1_1872	identical
BAbS19_I17530	60.37	BAB1_1873	identical
BAbS19_I17540	59.28	BAB1_1874	identical
BAbS19_I17550	59.97	BAB1_1875	identical
BAbS19_I17560	59.18	no match	identical
BAbS19_I17570	55.87	BAB1_1877	identical
BAbS19_I17580	59.77	BAB1_1878	identical
BAbS19_I17590	56.55	BAB1_1879	identical
BAbS19_I17600	45	no match	identical
BAbS19_I17610	61.72	BAB1_1880	identical
BAbS19_I17620	62.53	BAB1_1881	identical
BAbS19_I17630	59.89	BAB1_1882	identical
BAbS19_I17640	63.41	no match	identical
BAbS19_I17650	51.11	no match	identical
BAbS19_I17660	62.09	BAB1_1884	identical
BAbS19_I17670	62.09	BAB1_1885	identical
BAbS19_I17680	58.76	BAB1_1886	identical
BAbS19_I17690	62.65	BAB1_1887	identical
BAbS19_I17700	63.52	BAB1_1888	identical
BAbS19_I17710	62.49	BAB1_1889	identical
BAbS19_I17720	60.48	BAB1_1890	identical
BAbS19_I17730	58.04	BAB1_1891	identical
BAbS19_I17740	58.9	BAB1_1892	identical
BAbS19_I17750	61.54	BAB1_1893	identical
BAbS19_I17760	61.91	BAB1_1894	identical
BAbS19_I17770	61.17	BAB1_1895	identical
BAbS19_I17780	58.99	BAB1_1896	identical
BAbS19_I17790	59.22	BAB1_1897	identical
BAbS19_I17800	62.41	BAB1_1898	identical
BAbS19_I17810	56.18	BAB1_1899	identical
BAbS19_I17820	57.05	BAB1_1900	identical
BAbS19_I17830	61.73	BAB1_1901	identical
BAbS19_I17840	54.29	BAB1_1902	identical
BAbS19_I17850	59.4	BAB1_1903	identical
BAbS19_I17860	57.08	BAB1_1904	identical
BAbS19_I17870	60.43	BAB1_1905	identical
BAbS19_I17880	58.68	BAB1_1906	identical
BAbS19_I17890	57.24	no match	identical
BAbS19_I17900	60.32	BAB1_1909	identical
BAbS19_I17910	59.12	BAB1_1910	identical
BAbS19_I17920	59.23	BAB1_1911	identical
BAbS19_I17930	55.26	BAB1_1912	identical
BAbS19_I17940	59.16	BAB1_1913	identical
BAbS19_I17950	61.5	BAB1_1914	identical
BAbS19_I17960	58.07	BAB1_1915	identical
BAbS19_I17970	62.76	BAB1_1916	identical
BAbS19_I17980	56.49	BAB1_1917	identical
BAbS19_I17990	58.4	BAB1_1918	identical
BAbS19_I18000	53.96	BAB1_1919	identical
BAbS19_I18010	55.56	BAB1_1920	identical
BAbS19_I18020	59.66	BAB1_1921	identical
BAbS19_I18030	61.45	BAB1_1922	identical
BAbS19_I18040	59.34	BAB1_1923	identical
BAbS19_I18050	58.77	no match	identical
BAbS19_I18060	60.58	BAB1_1925	identical
BAbS19_I18070	57.64	BAB1_1926	identical
BAbS19_I18080	61.37	BAB1_1927	identical
BAbS19_I18090	57.82	BAB1_1929	identical
BAbS19_I18100	63.48	BAB1_1930	identical
BAbS19_I18110	50.98	BAB1_1931	identical
BAbS19_I18120	63.27	BAB1_1932	identical
BAbS19_I18130	60.12	BAB1_1933	identical
BAbS19_I18140	60.87	BAB1_1934	identical
BAbS19_I18150	56.26	BAB1_1935	identical
BAbS19_I18160	58.24	BAB1_1936	identical
BAbS19_I18170	56.14	no match	identical
BAbS19_I18180	56.21	BAB1_1939	identical
BAbS19_I18190	59.71	BAB1_1940	identical
BAbS19_I18200	60.15	BAB1_1941	identical
BAbS19_I18210	60.95	BAB1_1942	identical
BAbS19_I18220	52.78	BAB1_1943	identical
BAbS19_I18230	58.03	BAB1_1944	identical
BAbS19_I18240	58.58	BAB1_1946	identical
BAbS19_I18250	46.1	BAB1_1947	identical
BAbS19_I18260	59.05	BAB1_1948	identical
BAbS19_I18270	55.67	no match	identical
BAbS19_I18280	55.69	no match	identical
BAbS19_I18290	46.08	BAB1_1951	identical
BAbS19_I18300	59.04	BAB1_1953	identical
BAbS19_I18310	42.47	no match	identical
BAbS19_I18320	58.04	BAB1_1954	identical
BAbS19_I18330	59.61	no match	identical
BAbS19_I18340	58.09	BAB1_1956	identical
BAbS19_I18350	59.68	BAB1_1957	identical
BAbS19_I18360	60.26	BAB1_1958	identical
BAbS19_I18370	58.4	BAB1_1959	identical
BAbS19_I18380	57.41	BAB1_1960	identical
BAbS19_I18390	58.86	BAB1_1961	identical
BAbS19_I18400	51.9	BAB1_1962	identical
BAbS19_I18410	56.04	BAB1_1963	identical
BAbS19_I18420	54.13	BAB1_1964	identical
BAbS19_I18430	56.21	BAB1_1965	identical
BAbS19_I18440	58.96	BAB1_1966	identical
BAbS19_I18450	57.78	BAB1_1967	identical
BAbS19_I18480	57.31	BAB1_1970	identical
BAbS19_I18490	60.65	BAB1_1971	identical
BAbS19_I18500	58.1	BAB1_1972	identical
BAbS19_I18510	59.37	BAB1_1973	identical
BAbS19_I18520	56.28	BAB1_1974	identical
BAbS19_I18530	57.66	BAB1_1975	identical
BAbS19_I18540	60.71	BAB1_1976	identical
BAbS19_I18550	54.9	BAB1_1977	identical
BAbS19_I18560	60.02	BAB1_1978	identical
BAbS19_I18570	56.68	BAB1_1979	identical
BAbS19_I18580	60.7	BAB1_1980	identical
BAbS19_I18590	58.72	BAB1_1981	identical
BAbS19_I18600	59.53	BAB1_1982	identical
BAbS19_I18610	58.2	BAB1_1983	identical
BAbS19_I18620	61.06	BAB1_1984	identical
BAbS19_I18630	61.07	BAB1_1985	identical
BAbS19_I18640	55.68	BAB1_1986	identical
BAbS19_I18650	62.95	BAB1_1987	identical
BAbS19_I18660	59.17	BAB1_1988	identical
BAbS19_I18670	60.66	BAB1_1989	identical
BAbS19_I18680	57.75	no match	identical
BAbS19_I18690	57.93	BAB1_1991	identical
BAbS19_I18700	54.02	BAB1_1992	identical
BAbS19_I18710	55.18	BAB1_1993	identical
BAbS19_I18720	59.58	BAB1_1994	identical
BAbS19_I18730	54.49	BAB1_1995	identical
BAbS19_I18740	60.88	BAB1_1996	identical
BAbS19_I18750	60.15	BAB1_1997	identical
BAbS19_I18760	54.58	BAB1_1999	identical
BAbS19_I18770	58.52	BAB1_2001	identical
BAbS19_I18780	54.89	BAB1_2003	identical
BAbS19_I18790	57.24	BAB1_2004	identical
BAbS19_I18800	61.9	BAB1_2005	identical
BAbS19_I18810	55.99	BAB1_2006	identical
BAbS19_I18820	61.17	BAB1_2007	identical
BAbS19_I18840	43.33	BAB1_2010	identical
BAbS19_I18850	43.42	BAB1_2012	identical
BAbS19_I18860	51.16	no match	identical
BAbS19_I18880	58.63	BAB1_2015	identical
BAbS19_I18890	59.52	BAB1_2016	identical
BAbS19_I18900	55.16	BAB1_2017	identical
BAbS19_I18910	58.87	BAB1_2018	identical
BAbS19_I18930	44.54	BAB1_2020	identical
BAbS19_I18940	41.25	BAB1_2021	identical
BAbS19_I18950	61.6	BAB1_2022	identical
BAbS19_I18960	57.75	BAB1_2023	identical
BAbS19_I18970	56.83	BAB1_2025	identical
BAbS19_I18980	57.78	BAB1_2027	identical
BAbS19_I18990	59.4	BAB1_2028	identical
BAbS19_I19000	60.25	BAB1_2029	identical
BAbS19_I19010	58.21	BAB1_2030	identical
BAbS19_I19020	55.91	BAB1_2031	identical
BAbS19_I19030	59.63	BAB1_2032	identical
BAbS19_I19040	59.54	BAB1_2033	identical
BAbS19_I19050	58.5	BAB1_2034	identical
BAbS19_I19060	54.79	BAB1_2035	identical
BAbS19_I19070	59.59	BAB1_2036	identical
BAbS19_I19080	60.83	BAB1_2037	identical
BAbS19_I19090	59.54	BAB1_2038	identical
BAbS19_I19100	59.08	BAB1_2039	identical
BAbS19_I19110	50.57	BAB1_2040	identical
BAbS19_I19120	44.44	BAB1_2041	identical
BAbS19_I19130	58.59	BAB1_2042	identical
BAbS19_I19140	60.39	BAB1_2043	identical
BAbS19_I19150	59.12	BAB1_2044	identical
BAbS19_I19160	59.93	BAB1_2045	identical
BAbS19_I19170	61	BAB1_2046	identical
BAbS19_I19180	57.6	no match	identical
BAbS19_I19190	59.78	BAB1_2049	identical
BAbS19_I19200	58.92	BAB1_2050	identical
BAbS19_I19210	58.8	BAB1_2051	identical
BAbS19_I19220	59.34	BAB1_2052	identical
BAbS19_I19230	60.35	BAB1_2054	identical
BAbS19_I19240	58.64	BAB1_2056	identical
BAbS19_I19250	59.5	BAB1_2057	identical
BAbS19_I19260	59.96	BAB1_2058	identical
BAbS19_I19270	56.35	BAB1_2059	identical
BAbS19_I19280	54.14	BAB1_2060	identical
BAbS19_I19290	54.52	BAB1_2061	identical
BAbS19_I19300	56.78	BAB1_2062	identical
BAbS19_I19310	52.97	BAB1_2063	identical
BAbS19_I19320	54.87	BAB1_2064	identical
BAbS19_I19330	55.21	BAB1_2065	identical
BAbS19_I19340	53.82	BAB1_2066	identical
BAbS19_I19350	55.65	BAB1_2067	identical
BAbS19_I19360	55.71	BAB1_2068	identical
BAbS19_I19370	54.67	BAB1_2069	identical
BAbS19_I19380	58.39	BAB1_2070	identical
BAbS19_I19390	57.21	BAB1_2071	identical
BAbS19_I19410	56.91	BAB1_2073	identical
BAbS19_I19420	59.64	BAB1_2074	identical
BAbS19_I19430	55.46	BAB1_2075	identical
BAbS19_I19440	60.2	BAB1_2076	identical
BAbS19_I19450	63.18	BAB1_2077	identical
BAbS19_I19460	58.01	BAB1_2078	identical
BAbS19_I19470	56.47	BAB1_2079	identical
BAbS19_I19480	59.77	BAB1_2080	identical
BAbS19_I19490	59.46	BAB1_2081	identical
BAbS19_I19500	59.77	BAB1_2082	identical
BAbS19_I19510	59.61	BAB1_2083	identical
BAbS19_I19520	58.06	BAB1_2084	identical
BAbS19_I19530	59.7	BAB1_2085	identical
BAbS19_I19540	60.31	BAB1_2086	identical
BAbS19_I19550	62.04	BAB1_2087	identical
BAbS19_I19560	57.48	BAB1_2088	identical
BAbS19_I19570	59.36	BAB1_2089	identical
BAbS19_I19580	59.69	no match	identical
BAbS19_I19590	58.33	BAB1_2092	identical
BAbS19_I19600	59.58	BAB1_2093	identical
BAbS19_I19610	60.21	BAB1_2094	identical
BAbS19_I19620	55.22	BAB1_2096	identical
BAbS19_I19640	58.24	BAB1_2099	identical
BAbS19_I19650	60.54	BAB1_2101	identical
BAbS19_I19660	59.27	BAB1_2102	identical
BAbS19_I19670	59.31	BAB1_2103	identical
BAbS19_I19680	62.93	BAB1_2104	identical
BAbS19_I19690	61.42	BAB1_2105	identical
BAbS19_I19700	58.33	BAB1_2107	identical
BAbS19_I19710	59.89	BAB1_2108	identical
BAbS19_I19720	57.28	BAB1_2109	identical
BAbS19_I19730	58.81	BAB1_2110	identical
BAbS19_I19740	62.61	BAB1_2111	identical
BAbS19_I19750	60.2	BAB1_2112	identical
BAbS19_I19760	58.59	BAB1_2113	identical
BAbS19_I19770	57.7	BAB1_2114	identical
BAbS19_I19780	57.06	BAB1_2115	identical
BAbS19_I19790	60.67	no match	identical
BAbS19_I19800	55.56	no match	identical
BAbS19_I19820	60.23	BAB1_2120	identical
BAbS19_I19830	56.22	BAB1_2121	identical
BAbS19_I19840	54.63	BAB1_2122	identical
BAbS19_I19850	57.71	BAB1_2123	identical
BAbS19_I19860	57.78	BAB1_2124	identical
BAbS19_I19870	58.13	BAB1_2125	identical
BAbS19_I19880	59.19	BAB1_2126	identical
BAbS19_I19890	60.37	BAB1_2127	identical
BAbS19_I19900	57.85	BAB1_2128	identical
BAbS19_I19910	58.41	BAB1_2129	identical
BAbS19_I19920	59.61	BAB1_2130	identical
BAbS19_I19930	56.17	BAB1_2131	identical
BAbS19_I19940	60.11	BAB1_2132	identical
BAbS19_I19950	58.68	BAB1_2133	identical
BAbS19_I19960	58.73	BAB1_2134	identical
BAbS19_I19970	58.68	BAB1_2135	identical
BAbS19_I19980	61.75	no match	identical
BAbS19_I19990	57.58	BAB1_2137	identical
BAbS19_I20000	61.06	BAB1_2138	identical
BAbS19_I20010	60.19	BAB1_2140	identical
BAbS19_I20020	56.73	BAB1_2141	identical
BAbS19_I20030	60.3	BAB1_2142	identical
BAbS19_I20040	59.88	BAB1_2143	identical
BAbS19_I20050	60.08	BAB1_2144	identical
BAbS19_I20060	57.54	BAB1_2145	identical
BAbS19_I20070	61.86	BAB1_2146	identical
BAbS19_I20080	62.08	BAB1_2147	identical
BAbS19_I20090	55.8	BAB1_2148	identical
BAbS19_I20100	60.77	BAB1_2149	identical
BAbS19_I20110	55.62	BAB1_2150	identical
BAbS19_I20120	60.29	BAB1_2151	identical
BAbS19_I20130	61.28	BAB1_2152	identical
BAbS19_I20140	60.07	BAB1_2153	identical
BAbS19_I20150	61.11	BAB1_2154	identical
BAbS19_I20160	60.45	BAB1_2155	identical
BAbS19_I20170	54.62	BAB1_2156	identical
BAbS19_I20180	59.87	BAB1_2157	identical
BAbS19_I20190	60.29	BAB1_2158	identical
BAbS19_I20200	53.14	BAB1_2159	identical
BAbS19_I20210	60.51	BAB1_2160	identical
BAbS19_I20220	61.54	BAB1_2161	identical
BAbS19_I20230	58.79	BAB1_2162	identical
BAbS19_I20240	59.23	BAB1_2163	identical
BAbS19_I20250	60.7	BAB1_2164	identical
BAbS19_I20260	62.85	BAB1_2165	identical
BAbS19_I20270	58.94	no match	identical
BAbS19_I20280	60.51	no match	identical
BAbS19_I20290	56.3	BAB1_2168	identical
BAbS19_I20300	57.62	BAB1_2169	identical
BAbS19_I20310	58.72	BAB1_2170	identical
BAbS19_I20320	55.86	BAB1_2171	identical
BAbS19_I20330	58.49	BAB1_2172	identical
BAbS19_I20340	58.91	BAB1_2173	identical
BAbS19_I20350	62.04	BAB1_2174	identical
BAbS19_I20360	58.33	BAB1_2175	identical
BAbS19_I20370	55.64	BAB1_2176	identical
BAbS19_I20380	60.73	BAB1_2177	identical
BAbS19_I20390	60.77	BAB1_2178	identical
BAbS19_I20400	58.12	BAB1_2179	identical
BAbS19_I20410	60.37	BAB1_2180	identical
BAbS19_I20420	58.97	BAB1_2181	identical
[truncated: 1,067 more rows]

## Sheet: 3C.9_941_genes_to_s19_genome
Table S3C. Pair-wise and reciprocal comparisons between the genes and the genomes of the strains S19, 9-941 and 2308
9-941_RefSeq ID	corresponding S19 gene	type of difference	RefSeq annotation
BruAb1_0072	BAbS19_I00660	790 bases insertion at the beginning	outer membrane protein
BruAb2_0366	BAbS19_II03470	423 based insertion at the beginning	EryC, D-erythrulose-1-phosphate dehydrogenase
BruAb2_0365	BAbS19_II03470	247 bases insertion at the end	erythritol transcriptional regulator
BruAb1_0432	no match	103 bases insertion	hypothetical protein
BruAb2_0372	BAbS19_II03540	68 bases insertion	ribose ABC transporter, permease protein
BruAb2_0761	no match	34 bases deletion	hypothetical protein
BruAb2_0872	BAbS19_II08250	18 bases deletion	oxidoreductase, Gfo/Idh/MocA family
BruAb2_0168	BAbS19_II01580	fifteen bases insertion	outermembrane transporter
BruAb1_0019	BAbS19_I00160	seven bases insertion	carboxyl transferase family protein
BruAb1_1658	BAbS19_I15770	twelve bases insertion	HlyD family secretion protein
BruAb1_1784	BAbS19_I16930	twelve bases insertion	primosome assembly protein PriA
BruAb1_1187	BAbS19_I11200	two, one base difference and one base insertion	hypothetical protein
BruAb2_0559	BAbS19_II05380 # BAbS19_II05370	two, one base difference and one base insertion	branched-chain amino acid aminotransferase
BruAb2_0252	BAbS19_II02410	two base difference at end (premature stop)	glutamine amidotransferase, class I
BruAb1_0266	no match	two bases difference	hypothetical protein
BruAb1_0443	BAbS19_I04130	two bases difference	enoyl-(acyl carrier protein) reductase
BruAb2_0279	BAbS19_II02680	two bases difference	branched-chain amino acid ABC transporter, ATP-binding protein
BruAb1_0229	BAbS19_I02220	one base insertion	transcriptional regulator, IclR family
BruAb1_0259	no match	one base insertion	hypothetical protein
BruAb1_0277	BAbS19_I02570	one base insertion	translation initiation factor IF-1
BruAb1_1527	BAbS19_I14530	one base insertion	maoC-related protein
BruAb1_1735	BAbS19_I16480	one base insertion	hypothetical protein
BruAb2_0472	BAbS19_II04530	one base insertion	hypothetical membrane protein
BruAb1_0446	no match	one base deletion	hypothetical protein
BruAb1_1141	no match	one base deletion	hypothetical protein
BruAb1_1333	BAbS19_I12650	one base deletion	dedA family protein
BruAb2_0379	BAbS19_II03610	one base deletion	hypothetical epimerase/dehydratase family protein
BruAb2_0972	BAbS19_II09200	one base deletion	hypothetical membrane protein
BruAb2_1016	BAbS19_II09620	one base deletion	aldehyde dehydrogenase family protein
BruAb1_0010	BAbS19_I00100	one base difference	ABC transporter, periplasmic substrate-binding protein, hypothetical
BruAb1_0013	no match	one base difference	hypothetical protein
BruAb1_0023	BAbS19_I00200	one base difference	hypothetical protein
BruAb1_0025	BAbS19_I00220	one base difference	3-phosphoshikimate 1-carboxyvinyltransferase
BruAb1_0060	BAbS19_I00540	one base difference	transcriptional regulator, LysR family
BruAb1_0099	BAbS19_I00940	one base difference	response regulator, hypothetical
BruAb1_0108	BAbS19_I01030	one base difference	cyclic beta 1-2 glucan synthetase
BruAb1_0117	BAbS19_I01120	one base difference	3-5 exonuclease family protein
BruAb1_0146	BAbS19_I01410	one base difference	RNA methyltransferase, TrmH family
BruAb1_0177	BAbS19_I01720	one base difference	CysI, sulfite reductase (NADPH) hemoprotein beta-component
BruAb1_0184	BAbS19_I01790	one base difference	MetH, 5-methyltetrahydrofolate--homocysteine methyltransferase
BruAb1_0208	BAbS19_I02010	one base difference	ABC transporter, periplasmic substrate-binding protein
BruAb1_0228	BAbS19_I02210	one base difference	hypothetical protein
BruAb1_0230	BAbS19_I02230	one base difference	sugar ABC transporter, periplasmic sugar-binding protein
BruAb1_0244	no match	one base difference	hypothetical protein
BruAb1_0246	no match	one base difference	hypothetical protein
BruAb1_0300	BAbS19_I02760	one base difference	sensor histidine kinase
BruAb1_0315	BAbS19_I02900	one base difference	acyl-CoA synthase
BruAb1_0347	BAbS19_I03210	one base difference	glycosyl transferase, family 25
BruAb1_0363	BAbS19_I03350	one base difference	hypothetical proline racemase
BruAb1_0395	BAbS19_I03690	one base difference	hypothetical protein
BruAb1_0399	BAbS19_I03730	one base difference	hypothetical protein
BruAb1_0500	BAbS19_I04670	one base difference	ahpC/TSA family protein
BruAb1_0519	BAbS19_I04860	one base difference	SMC family protein
BruAb1_0533	BAbS19_I04990	one base difference	glycosyl transferase, group 4 family protein
BruAb1_0556	BAbS19_I05120	one base difference	transposase orfA
BruAb1_0560	BAbS19_I05230	one base difference	phosphomannomutase, hypothetical
BruAb1_0606	BAbS19_I05700	one base difference	hypothetical terminase large subunit
BruAb1_0624	BAbS19_I05890	one base difference	sensor histidine kinase
BruAb1_0631	BAbS19_I05960	one base difference	DNA-binding response regulator
BruAb1_0632	BAbS19_I05970	one base difference	sensor histidine kinase
BruAb1_0635	BAbS19_I06000	one base difference	histidine kinase
BruAb1_0657	BAbS19_I06190	one base difference	Omp2b, porin
BruAb1_0671	BAbS19_I06310	one base difference	transcriptional regulator, Crp/Fnr family
BruAb1_0701	BAbS19_I06570	one base difference	dimethyladenosine transferase
BruAb1_0719	BAbS19_I06740	one base difference	short chain dehydrogenase
BruAb1_0724	BAbS19_I06790	one base difference	hypothetical protein
BruAb1_0772	BAbS19_I07270	one base difference	arginyl-tRNA-protein transferase
BruAb1_0783	BAbS19_I07380	one base difference	RibD, riboflavin biosynthesis protein RibD
BruAb1_0814	BAbS19_I07640	one base difference	hypothetical protein
BruAb1_0820	BAbS19_I07700	one base difference	ATP synthase subunit E
BruAb1_0821	BAbS19_I07710	one base difference	NuoF, NADH dehydrogenase I, F subunit
BruAb1_0841	BAbS19_I07890	one base difference	hypothetical protein
BruAb1_0874	BAbS19_I08220	one base difference	hypothetical amino-acid ABC transporter, periplasmic binding protein protein
BruAb1_0875	BAbS19_I08230	one base difference	TIM-barrel protein, yjbN family
BruAb1_0879	BAbS19_I08270	one base difference	nicotinate-nucleotide--dimethylbenzimidazole phosphoribosyltransferase
BruAb1_0912	BAbS19_I08590	one base difference	acetyltransferase, GNAT family
BruAb1_0929	BAbS19_I08760	one base difference	IS711, transposase orfB
BruAb1_0945	BAbS19_I08920	one base difference	glycosyl transferase, group 2 family protein
BruAb1_0954	BAbS19_I09000	one base difference	outer membrane efflux family protein
BruAb1_1006	BAbS19_I09450	one base difference	hypothetical membrane protein
BruAb1_1014	BAbS19_I09530	one base difference	hypothetical protein
BruAb1_1018	BAbS19_I09570	one base difference	Dhs, phospho-2-dehydro-3-deoxyheptonate aldolase, class II
BruAb1_1029	BAbS19_I09680	one base difference	hypothetical protein
BruAb1_1041	BAbS19_I09800	one base difference	DksA, dnaK suppressor protein
BruAb1_1068	BAbS19_I10070	one base difference	hypothetical protein
BruAb1_1114	BAbS19_I10500	one base difference	ATP-dependent protease ATP-binding subunit
BruAb1_1134	BAbS19_I10690	one base difference	dihydrolipoamide acetyltransferase
BruAb1_1140	BAbS19_I10750	one base difference	CTP synthetase
BruAb1_1191	BAbS19_I11240	one base difference	hypothetical protein
BruAb1_1196	BAbS19_I11290	one base difference	hypothetical protein
BruAb1_1241	BAbS19_I11740	one base difference	elongation factor EF-2
BruAb1_1250	BAbS19_I11810	one base difference	50S ribosomal protein L10
BruAb1_1289	BAbS19_I12190	one base difference	precorrin-2 methyltransferase
BruAb1_1307	BAbS19_I12390	one base difference	cobaltochelatase
BruAb1_1317	no match	one base difference	hypothetical protein
BruAb1_1321	BAbS19_I12520	one base difference	hypothetical protein
BruAb1_1323	BAbS19_I12540	one base difference	hypothetical protein
BruAb1_1347	BAbS19_I12780	one base difference	hypothetical ABC transporter, permease protein
BruAb1_1350	no match	one base difference	hypothetical protein
BruAb1_1351	BAbS19_I12830	one base difference	hypothetical protein
BruAb1_1368	BAbS19_I12990	one base difference	hypothetical protein
BruAb1_1371	BAbS19_I13030	one base difference	hypothetical protein
BruAb1_1421	BAbS19_I13510	one base difference	FtsA, cell division protein FtsA
BruAb1_1442	BAbS19_I13700	one base difference	glycosyl hydrolase, family 25
BruAb1_1470	BAbS19_I13950	one base difference	Omp28, immunoreactive 28 kDa outer membrane protein
BruAb1_1474	BAbS19_I13990	one base difference	RNA polymerase sigma factor
BruAb1_1479	BAbS19_I14040	one base difference	hypothetical protein
BruAb1_1504	BAbS19_I14270	one base difference	excinuclease ABC subunit B
BruAb1_1545	BAbS19_I14710	one base difference	MoxR, moxR protein
BruAb1_1551	BAbS19_I14770	one base difference	hypothetical membrane protein
BruAb1_1558	BAbS19_I14830	one base difference	TrpE, anthranilate synthase
BruAb1_1589	BAbS19_I15130	one base difference	oxidoreductase, Gfo/Idh/MocA family
BruAb1_1596	BAbS19_I15170	one base difference	spermidine/putrescine ABC transporter, permease protein
BruAb1_1598	BAbS19_I15200	one base difference	spermidine/putrescine ABC transporter, ATP-binding protein
BruAb1_1609	BAbS19_I15330	one base difference	hypothetical protein
BruAb1_1622	BAbS19_I15450	one base difference	hypothetical protein
BruAb1_1669	BAbS19_I15870	one base difference	acetyltransferase, GNAT family
BruAb1_1671	no match	one base difference	hypothetical protein
BruAb1_1716	BAbS19_I16290	one base difference	PrpE, propionate--CoA ligase
BruAb1_1719	BAbS19_I16320	one base difference	hypothetical transcriptional regulator
BruAb1_1774	BAbS19_I16830	one base difference	D-amino acid dehydrogenase small subunit
BruAb1_1787	BAbS19_I16960	one base difference	leucyl-tRNA synthetase
BruAb1_1822	BAbS19_I17310	one base difference	gamma-glutamyl phosphate reductase
BruAb1_1840	BAbS19_I17470	one base difference	peptidase, M23/M37 family
BruAb1_1866	BAbS19_I17710	one base difference	GpsA, glycerol-3-phosphate dehydrogenase, NAD-dependent
BruAb1_1872	BAbS19_I17770	one base difference	hypothetical cell division protein FtsK
BruAb1_1891	BAbS19_I17960	one base difference	16S rRNA-processing protein
BruAb1_1933	BAbS19_I18360	one base difference	arginase family protein
BruAb1_1993	BAbS19_I18920	one base difference	CadA-1, cadmium-translocating P-type ATPase
BruAb1_1996	BAbS19_I18950	one base difference	cobalamin biosynthesis protein, hypothetical
BruAb1_2026	BAbS19_I19220	one base difference	bacterial luciferase family protein
BruAb1_2046	BAbS19_I19400	one base difference	DNA polymerase III subunit epsilon
BruAb1_2049	BAbS19_I19430	one base difference	hypothetical protein
BruAb1_2074	BAbS19_I19650	one base difference	sensory box histidine kinase, hypothetical
BruAb1_2108	BAbS19_I19990	one base difference	hypothetical protein
BruAb1_2151	BAbS19_I20400	one base difference	hypothetical hydrolase
BruAb2_0005	BAbS19_II00040	one base difference	hypothetical ribokinase
BruAb2_0107	BAbS19_II00980	one base difference	oxidoreductase, Gfo/Idh/MocA family
BruAb2_0179	BAbS19_II01690	one base difference	hypothetical protein
BruAb2_0207	BAbS19_II01950	one base difference	PmbA
BruAb2_0247	BAbS19_II02350	one base difference	cobalamin synthesis protein/P47K family protein
BruAb2_0280	BAbS19_II02690	one base difference	hypothetical branched-chain amino acid ABC transporter, periplasmic amino acid-binding protein
BruAb2_0290	no match	one base difference	hypothetical protein
BruAb2_0306	BAbS19_II02920	one base difference	HutC, histidine utilization repressor
BruAb2_0328	BAbS19_II03130	one base difference	oxidoreductase, hypothetical
BruAb2_0362	BAbS19_II03440	one base difference	ribose-5-phosphate isomerase B
BruAb2_0390	BAbS19_II03720	one base difference	HsdS, type I restriction-modification system, S subunit
BruAb2_0426	BAbS19_II04060	one base difference	hydrolase, UxaA family
BruAb2_0439	BAbS19_II04190	one base difference	FadB, fatty oxidation complex, alpha subunit
BruAb2_0463	BAbS19_II04440	one base difference	hypothetical protein
BruAb2_0469	BAbS19_II04500	one base difference	glutamate--cysteine ligase
BruAb2_0517	BAbS19_II04960	one base difference	IolC myo-catabolism protein
BruAb2_0549	BAbS19_II05280	one base difference	hypothetical protein
BruAb2_0567	BAbS19_II05440	one base difference	transporter, TrkA family
BruAb2_0571	BAbS19_II05480	one base difference	UgbB, glycerol-3-phosphate ABC transporter, periplasmic glycerol-3-phosphate-binding protein
BruAb2_0611	BAbS19_II05850	one base difference	nucleoside diphosphate kinase regulator
BruAb2_0619	BAbS19_II05930	one base difference	exoribonuclease, VacB/RNase II family
BruAb2_0620	BAbS19_II05940	one base difference	DNA topoisomerase I
BruAb2_0636	BAbS19_II06090	one base difference	sensory box protein
BruAb2_0645	BAbS19_II06180	one base difference	Mfd, transcription-repair coupling factor
BruAb2_0668	BAbS19_II06390	one base difference	hypothetical IS66 family element, orf3
BruAb2_0672	BAbS19_II06420	one base difference	transcriptional regulator, AraC family
BruAb2_0691	BAbS19_II06590	one base difference	transposase orfA
BruAb2_0747	BAbS19_II07060	one base difference	hypothetical protein
BruAb2_0768	BAbS19_II07260	one base difference	peptide deformylase
BruAb2_0798	BAbS19_II07580	one base difference	oxidoreductase, Gfo/Idh/MocA family
BruAb2_0827	BAbS19_II07850	one base difference	KatA, catalase
BruAb2_0832	BAbS19_II07900	one base difference	hypothetical protein
BruAb2_0842	BAbS19_II07980	one base difference	glutamate/gamma-aminobutyrate antiporter
BruAb2_0877	BAbS19_II08290	one base difference	sugar ABC transporter, periplasmic sugar-binding protein
BruAb2_0882	BAbS19_II08330	one base difference	NarG, respiratory nitrate reductase, alpha subunit
BruAb2_0903	BAbS19_II08550	one base difference	copper ABC transporter, ATP-binding protein
BruAb2_0952	BAbS19_II09030	one base difference	ABC transporter, periplasmic substrate-binding protein
BruAb2_1010	BAbS19_II09580	one base difference	hypothetical protein
BruAb2_1025	BAbS19_II09710	one base difference	dehydrogenase complex, E1 component, dehydrogenase
BruAb2_1040	BAbS19_II09870	one base difference	oligopeptide ABC transporter, ATP-binding protein
BruAb2_1076	BAbS19_II10230	one base difference	flagellar hook protein
BruAb2_1083	BAbS19_II10300	one base difference	FliF, flagellar M-ring protein
BruAb2_1092	BAbS19_II10380	one base difference	aldehyde dehydrogenase family protein
BruAb2_1104	BAbS19_II10510	one base difference	hypothetical protein
BruAb2_1105	BAbS19_II10520	one base difference	transcriptional regulator, IclR family
BruAb2_1123	BAbS19_II10700	one base difference	aurine ABC transporter, ATP-binding protein
BruAb1_0001	BAbS19_I00010	identical	chromosomal replication initiation protein
BruAb1_0002	BAbS19_I00020	identical	DNA polymerase III subunit beta
BruAb1_0003	BAbS19_I00030	identical	recombination protein F
BruAb1_0004	BAbS19_I00040	identical	molybdopterin biosynthesis protein MoeB
BruAb1_0005	BAbS19_I00050	identical	D-isomer specific 2-hydroxyacid dehydrogenase family protein
BruAb1_0006	BAbS19_I00060	identical	ABC transporter, ATP-binding protein
BruAb1_0007	BAbS19_I00070	identical	ABC transporter, permease protein
BruAb1_0008	BAbS19_I00080	identical	ABC transporter, permease protein
BruAb1_0009	BAbS19_I00090	identical	ABC transporter, periplasmic substrate-binding protein, hypothetical
BruAb1_0011	no match	identical	hypothetical protein
BruAb1_0012	BAbS19_I00110	identical	hypothetical protein
BruAb1_0015	no match	identical	hypothetical protein
BruAb1_0016	BAbS19_I00130	identical	enoyl-CoA hydratase
BruAb1_0017	BAbS19_I00140	identical	hydroxymethylglutaryl-CoA lyase
BruAb1_0018	BAbS19_I00150	identical	biotin carboxylase
BruAb1_0020	BAbS19_I00170	identical	Ivd, isovaleryl-CoA dehydrogenase
BruAb1_0022	BAbS19_I00190	identical	hypothetical protein
BruAb1_0024	BAbS19_I00210	identical	hypothetical protein
BruAb1_0026	BAbS19_I00230	identical	cytidylate kinase
BruAb1_0027	BAbS19_I00240	identical	30S ribosomal protein S1
BruAb1_0028	BAbS19_I00250	identical	hypothetical protein
BruAb1_0029	BAbS19_I00260	identical	transcriptional regulator, LysR family
BruAb1_0031	BAbS19_I00270	identical	hypothetical transglycosylase
BruAb1_0032	BAbS19_I00280	identical	recombination protein RecR
BruAb1_0033	BAbS19_I00290	identical	hypothetical protein
BruAb1_0034	BAbS19_I00300	identical	DNA polymerase III subunits gamma and tau
BruAb1_0035	BAbS19_I00310	identical	hypothetical protein
BruAb1_0036	BAbS19_I00320	identical	MutT/nudix family protein
BruAb1_0037	BAbS19_I00330	identical	prephenate dehydratase
BruAb1_0038	BAbS19_I00340	identical	3-deoxy-manno-octulosonate cytidylyltransferase
BruAb1_0039	BAbS19_I00350	identical	cytochrome c, membrane-bound
BruAb1_0040	BAbS19_I00360	identical	hypothetical protein
BruAb1_0041	no match	identical	hypothetical protein
BruAb1_0042	BAbS19_I00370	identical	CyoA, ubiquinol oxidase, subunit II
BruAb1_0044	BAbS19_I00400	identical	ubiquinol oxidase subunit III
BruAb1_0045	BAbS19_I00410	identical	QoxD, ubiquinol oxidase subunit IV
BruAb1_0046	no match	identical	hypothetical protein
BruAb1_0048	BAbS19_I00430	identical	hypothetical protein
BruAb1_0049	BAbS19_I00440	identical	hypothetical protein
BruAb1_0050	BAbS19_I00450	identical	lipoprotein, hypothetical
BruAb1_0051	BAbS19_I00460	identical	hypothetical protein
BruAb1_0052	BAbS19_I00470	identical	hypothetical protein
BruAb1_0053	BAbS19_I00480	identical	hypothetical protein
BruAb1_0054	BAbS19_I00490	identical	hypothetical protein
BruAb1_0055	BAbS19_I00500	identical	hypothetical protein
BruAb1_0056	BAbS19_I00510	identical	glyoxalase family protein
BruAb1_0057	BAbS19_I00520	identical	mrp-related protein
BruAb1_0058	BAbS19_I00530	identical	phosphoglucomutase
BruAb1_0059	no match	identical	hypothetical protein
BruAb1_0061	BAbS19_I00550	identical	dienelactone hydrolase domain protein
BruAb1_0062	BAbS19_I00560	identical	hypothetical protein
BruAb1_0063	BAbS19_I00570	identical	fumarylacetoacetate hydrolase family protein
BruAb1_0064	BAbS19_I00580	identical	hypothetical protein
BruAb1_0065	BAbS19_I00590	identical	hypothetical protein
BruAb1_0066	BAbS19_I00600	identical	hypothetical protein
BruAb1_0067	BAbS19_I00610	identical	Transglycosylase SLT domain protein
BruAb1_0068	BAbS19_I00620	identical	channel protein, hemolysin III family
BruAb1_0069	BAbS19_I00630	identical	DNA polymerase III subunit alpha
BruAb1_0070	BAbS19_I00640	identical	hypothetical protein
BruAb1_0071	BAbS19_I00650	identical	hypothetical protein
BruAb1_0073	no match	identical	hypothetical protein
BruAb1_0074	BAbS19_I00670	identical	argininosuccinate synthase
BruAb1_0075	BAbS19_I00680	identical	amino acid efflux protein LysE family
BruAb1_0076	BAbS19_I00690	identical	hypothetical protein
BruAb1_0077	BAbS19_I00700	identical	conserved hypothetical protein TIGR00048
BruAb1_0078	BAbS19_I00710	identical	hypothetical protein
BruAb1_0079	BAbS19_I00720	identical	hypothetical protein
BruAb1_0080	BAbS19_I00730	identical	PhhB, pterin-4-alpha-carbinolamine dehydratase
BruAb1_0082	BAbS19_I00750	identical	hypothetical protein
BruAb1_0083	BAbS19_I00760	identical	lipase/acylhydrolase domain protein
BruAb1_0084	BAbS19_I00770	identical	ABC transporter, ATP-binding protein
BruAb1_0085	BAbS19_I00780	identical	ABC transporter, permease protein
BruAb1_0086	BAbS19_I00790	identical	hypothetical membrane protein
BruAb1_0088	BAbS19_I00820	identical	hypothetical protein
BruAb1_0089	BAbS19_I00830	identical	hypothetical protein
BruAb1_0090	BAbS19_I00850	identical	aconitate hydratase
BruAb1_0091	BAbS19_I00860	identical	CcmA, heme exporter protein
BruAb1_0092	BAbS19_I00870	identical	CcmB, heme exporter protein
BruAb1_0093	BAbS19_I00880	identical	CcmC, heme exporter protein
BruAb1_0094	BAbS19_I00890	identical	heme exporter protein D
BruAb1_0095	BAbS19_I00900	identical	CycY, thiol:disulfide interchange protein, thioredoxin family
BruAb1_0096	BAbS19_I00910	identical	dihydroxy-acid dehydratase
BruAb1_0097	BAbS19_I00920	identical	hypothetical protein
BruAb1_0098	BAbS19_I00930	identical	hypothetical protein
BruAb1_0100	BAbS19_I00950	identical	transcriptional regulator, hypothetical
BruAb1_0101	BAbS19_I00960	identical	hypothetical protein
BruAb1_0102	BAbS19_I00970	identical	hypothetical protein
BruAb1_0103	BAbS19_I00980	identical	hypothetical protein
BruAb1_0104	BAbS19_I00990	identical	sulfate ABC transporter, sulfate-binding protein
BruAb1_0105	BAbS19_I01000	identical	sulfate ABC transporter, permease protein
BruAb1_0106	BAbS19_I01010	identical	CysW-1, sulfate ABC transporter, permease protein
BruAb1_0107	BAbS19_I01020	identical	hypothetical sulfate ABC transporter, ATP-binding protein
BruAb1_0109	BAbS19_I01040	identical	nicotinate phosphoribosyltransferase
BruAb1_0110	BAbS19_I01050	identical	phenazine biosynthesis protein, PhzF family
BruAb1_0111	BAbS19_I01060	identical	hypothetical protein
BruAb1_0112	BAbS19_I01070	identical	CscK, fructokinase
BruAb1_0113	BAbS19_I01080	identical	oxidoreductase, short chain dehydrogenase/reductase family
BruAb1_0114	BAbS19_I01090	identical	penicillin-binding protein, 1A family
BruAb1_0115	BAbS19_I01100	identical	outer membrane protein, hypothetical
BruAb1_0116	BAbS19_I01110	identical	outer membrane protein, hypothetical
BruAb1_0118	BAbS19_I01130	identical	hypothetical protein
BruAb1_0119	no match	identical	hypothetical protein
BruAb1_0120	BAbS19_I01140	identical	DNA polymerase I
BruAb1_0121	BAbS19_I01150	identical	ATP-dependent RNA helicase, DEAD/DEAH box family
BruAb1_0122	BAbS19_I01160	identical	DNA gyrase subunit B
BruAb1_0123	BAbS19_I01170	identical	hypothetical protein
BruAb1_0124	BAbS19_I01180	identical	esterase, hypothetical
BruAb1_0126	BAbS19_I01210	identical	acetyltransferase, GNAT family
BruAb1_0127	BAbS19_I01220	identical	glutathione-dependent formaldehyde dehydrogenase
BruAb1_0130	BAbS19_I01250	identical	sensor histidine kinase
BruAb1_0131	BAbS19_I01260	identical	IS711, transposase orfA
BruAb1_0132	BAbS19_I01270	identical	IS711, transposase orfB
BruAb1_0133	no match	identical	hypothetical protein
BruAb1_0134	BAbS19_I01280	identical	DNA-binding response regulator
BruAb1_0135	BAbS19_I01290	identical	hypothetical protein
BruAb1_0136	BAbS19_I01300	identical	lipoprotein, hypothetical
BruAb1_0137	BAbS19_I01310	identical	NifU-related protein
BruAb1_0138	BAbS19_I01320	identical	hypothetical protein
BruAb1_0139	BAbS19_I01330	identical	tryptophanyl-tRNA synthetase
BruAb1_0140	BAbS19_I01340	identical	MviN, virulence factor
BruAb1_0141	BAbS19_I01350	identical	PII uridylyl-transferase
BruAb1_0143	BAbS19_I01380	identical	DNA mismatch repair protein
BruAb1_0144	BAbS19_I01390	identical	hypothetical protein
BruAb1_0145	BAbS19_I01400	identical	LspA, lipoprotein signal peptidase
BruAb1_0148	BAbS19_I01440	identical	hypothetical protein
BruAb1_0149	BAbS19_I01450	identical	integration host factor beta subunit
BruAb1_0150	BAbS19_I01460	identical	SppA, signal peptide peptidase SppA
BruAb1_0151	BAbS19_I01470	identical	hypothetical protein
BruAb1_0152	BAbS19_I01480	identical	hypothetical protein
BruAb1_0153	BAbS19_I01490	identical	ABC transporter, ATP-binding protein
BruAb1_0154	BAbS19_I01500	identical	DNA-directed RNA polymerase subunit N
BruAb1_0155	no match	identical	hypothetical protein
BruAb1_0156	BAbS19_I01510	identical	YfiA, ribosomal subunit interface protein
BruAb1_0157	BAbS19_I01520	identical	PtsN, PTS system, nitrogen regulatory IIA component
BruAb1_0158	BAbS19_I01530	identical	hypothetical protein
BruAb1_0159	BAbS19_I01540	identical	heat shock protein, Hsp20 family
BruAb1_0160	BAbS19_I01550	identical	hypothetical protein
BruAb1_0161	BAbS19_I01560	identical	hypothetical protein
BruAb1_0162	BAbS19_I01570	identical	Nth, endonuclease III
BruAb1_0163	BAbS19_I01580	identical	hypothetical protein
BruAb1_0164	no match	identical	hypothetical protein
BruAb1_0165	BAbS19_I01590	identical	carbohydrate kinase, PfkB family
BruAb1_0166	BAbS19_I01600	identical	hypothetical protein
BruAb1_0167	BAbS19_I01610	identical	GrpE, heat shock protein
BruAb1_0168	BAbS19_I01620	identical	heat-inducible transcription repressor
BruAb1_0169	BAbS19_I01630	identical	ribonuclease PH
BruAb1_0171	BAbS19_I01660	identical	putative deoxyribonucleotide triphosphate pyrophosphatase
BruAb1_0172	BAbS19_I01670	identical	coproporphyrinogen III oxidase
BruAb1_0173	BAbS19_I01680	identical	tetrapyrrole methylase family protein
BruAb1_0174	BAbS19_I01690	identical	hypothetical protein
BruAb1_0175	BAbS19_I01700	identical	CysG, siroheme synthase
BruAb1_0176	BAbS19_I01710	identical	hypothetical protein
BruAb1_0178	BAbS19_I01730	identical	phosphoadenosine phosphosulfate reductase
BruAb1_0179	BAbS19_I01740	identical	hypothetical protein
BruAb1_0180	BAbS19_I01750	identical	hypothetical protein
BruAb1_0181	BAbS19_I01760	identical	Ogt, methylated-DNA--protein-cysteine methyltransferase
BruAb1_0182	BAbS19_I01770	identical	hypothetical protein
BruAb1_0183	BAbS19_I01780	identical	hypothetical protein
BruAb1_0185	BAbS19_I01800	identical	transcriptional regulator, LuxR autoinducer regulated family
BruAb1_0186	BAbS19_I01810	identical	hypothetical protein
BruAb1_0187	no match	identical	hypothetical protein
BruAb1_0188	BAbS19_I01820	identical	sulfate adenylyltransferase subunit 2
BruAb1_0189	BAbS19_I01830	identical	binfunctional sulfate adenylyltransferase subunit 1/adenylylsulfate kinase protein
BruAb1_0190	BAbS19_I01840	identical	CysQ, 3(2),5-bisphosphate nucleotidase
BruAb1_0191	BAbS19_I01850	identical	transcriptional regulator, Crp/Fnr family
BruAb1_0192	BAbS19_I01860	identical	transcriptional regulator, LuxR family
BruAb1_0193	no match	identical	hypothetical protein
BruAb1_0194	BAbS19_I01870	identical	GlpR, glycerol-3-phosphate transcriptional regulator
BruAb1_0195	BAbS19_I01880	identical	GlpD, glycerol-3-phosphate dehydrogenase
BruAb1_0196	BAbS19_I01890	identical	transcriptional regulator, Fis family
BruAb1_0198	BAbS19_I01920	identical	alcohol dehydrogenase, zinc-containing
BruAb1_0199	BAbS19_I01930	identical	hypothetical protein
BruAb1_0200	BAbS19_I01940	identical	transcriptional regulator LacI family
BruAb1_0202	no match	identical	hypothetical protein
BruAb1_0203	no match	identical	hypothetical protein
BruAb1_0204	no match	identical	hypothetical protein
BruAb1_0205	BAbS19_I01980	identical	aldehyde dehydrogenase family protein
BruAb1_0206	BAbS19_I01990	identical	ABC transporter, permease protein
BruAb1_0207	BAbS19_I02000	identical	transcriptional regulator TenA, hypothetical
BruAb1_0209	BAbS19_I02020	identical	thiamine-phosphate pyrophosphorylase
BruAb1_0210	BAbS19_I02030	identical	thiazole synthase
BruAb1_0211	BAbS19_I02040	identical	hypothetical protein
BruAb1_0212	BAbS19_I02050	identical	D-amino acid oxidase family protein
BruAb1_0213	BAbS19_I02060	identical	ThiD, phosphomethylpyrimidine kinase
BruAb1_0214	BAbS19_I02070	identical	sensory box/GGDEF domain/EAL domain protein
BruAb1_0215	BAbS19_I02080	identical	copper-translocating P-type ATPase
BruAb1_0216	BAbS19_I02090	identical	transcriptional regulator, MerR family
BruAb1_0217	BAbS19_I02100	identical	ABC transporter, permease protein
BruAb1_0218	BAbS19_I02110	identical	ABC transporter, ATP-binding protein
BruAb1_0219	BAbS19_I02120	identical	ABC transporter, permease protein
BruAb1_0220	BAbS19_I02130	identical	ABC transporter, periplasmic substrate-binding protein, hypothetical
BruAb1_0221	BAbS19_I02140	identical	hypothetical protein
BruAb1_0222	BAbS19_I02150	identical	glutamate dehydrogenase, hypothetical
BruAb1_0223	no match	identical	hypothetical protein
BruAb1_0225	BAbS19_I02170	identical	SoxD, sarcosine oxidase, delta subunit
BruAb1_0227	BAbS19_I02200	identical	SoxG, sarcosine oxidase, gamma subunit
BruAb1_0231	BAbS19_I02240	identical	sugar ABC transporter, permease protein
BruAb1_0232	BAbS19_I02250	identical	sugar ABC transporter, permease protein
BruAb1_0233	BAbS19_I02260	identical	sugar ABC transporter, ATP-binding protein
BruAb1_0234	BAbS19_I02270	identical	mandelate racemase/muconate lactonizing enzyme family protein
BruAb1_0235	BAbS19_I02280	identical	hypothetical protein
BruAb1_0236	BAbS19_I02290	identical	oxidoreductase, Gfo/Idh/MocA family
BruAb1_0237	BAbS19_I02300	identical	hypothetical protein
BruAb1_0238	BAbS19_I02310	identical	oxidoreductase, short chain dehydrogenase/reductase family
BruAb1_0239	BAbS19_I02320	identical	fumarylacetoacetate hydrolase family protein
BruAb1_0240	BAbS19_I02330	identical	mandelate racemase/muconate lactonizing enzyme domain protein
BruAb1_0241	no match	identical	hypothetical protein
BruAb1_0242	no match	identical	hypothetical protein
BruAb1_0243	no match	identical	hypothetical protein
BruAb1_0245	BAbS19_I02340	identical	hypothetical integrase prophage protein
BruAb1_0247	BAbS19_I02350	identical	hypothetical protein
BruAb1_0248	no match	identical	hypothetical protein
BruAb1_0249	BAbS19_I02360	identical	hypothetical protein
BruAb1_0250	BAbS19_I02370	identical	hypothetical protein
BruAb1_0252	BAbS19_I02400	identical	hypothetical protein
BruAb1_0253	BAbS19_I02410	identical	hypothetical protein
BruAb1_0254	BAbS19_I02420	identical	hypothetical protein
BruAb1_0255	BAbS19_I02430	identical	FlgJ
BruAb1_0257	BAbS19_I02460	identical	hypothetical protein
BruAb1_0258	no match	identical	hypothetical protein
BruAb1_0260	BAbS19_I02470	identical	hypothetical protein
BruAb1_0261	no match	identical	hypothetical protein
BruAb1_0262	no match	identical	hypothetical protein
BruAb1_0263	no match	identical	hypothetical protein
BruAb1_0264	BAbS19_I02480	identical	zinc-dependent metallopeptidase
BruAb1_0265	no match	identical	hypothetical protein
BruAb1_0267	BAbS19_I02490	identical	hypothetical protein
BruAb1_0268	BAbS19_I02500	identical	hypothetical protein
BruAb1_0269	BAbS19_I02510	identical	hypothetical protein
BruAb1_0270	BAbS19_I02520	identical	hypothetical protein
BruAb1_0271	BAbS19_I02530	identical	hypothetical protein
BruAb1_0272	no match	identical	hypothetical protein
BruAb1_0273	no match	identical	hypothetical protein
BruAb1_0274	BAbS19_I02540	identical	hypothetical protein
BruAb1_0275	BAbS19_I02550	identical	zinc-binding protein
BruAb1_0276	BAbS19_I02560	identical	Maf-like protein
BruAb1_0278	BAbS19_I02580	identical	protein phosphatase, hypothetical
BruAb1_0279	BAbS19_I02590	identical	hypothetical protein
BruAb1_0280	BAbS19_I02600	identical	histidinol dehydrogenase
BruAb1_0281	BAbS19_I02610	identical	hypothetical protein
BruAb1_0282	BAbS19_I02620	identical	UDP-N-acetylglucosamine 1-carboxyvinyltransferase
BruAb1_0283	BAbS19_I02630	identical	hypothetical protein
BruAb1_0284	BAbS19_I02640	identical	site-specific recombinase, phage integrase family
BruAb1_0286	no match	identical	hypothetical protein
BruAb1_0287	BAbS19_I02660	identical	site-specific recombinase, resolvase family
BruAb1_0289	no match	identical	hypothetical protein
BruAb1_0290	no match	identical	hypothetical protein
BruAb1_0291	no match	identical	hypothetical protein
BruAb1_0292	BAbS19_I02680	identical	hypothetical protein
BruAb1_0293	BAbS19_I02690	identical	UreD-1, urease accessory protein UreD
BruAb1_0294	BAbS19_I02700	identical	UreA-1, urease, gamma subunit
BruAb1_0295	BAbS19_I02710	identical	UreB-1, urease, beta subunit
BruAb1_0296	BAbS19_I02720	identical	UreC-1, urease, alpha subunit
BruAb1_0297	BAbS19_I02730	identical	urease accessory protein UreE, hypothetical
BruAb1_0298	BAbS19_I02740	identical	hypothetical urease accessory protein UreF
BruAb1_0299	BAbS19_I02750	identical	UreG-1, urease accessory protein UreG
BruAb1_0301	no match	identical	hypothetical protein
BruAb1_0302	BAbS19_I02770	identical	transporter, hypothetical
BruAb1_0303	BAbS19_I02780	identical	AcrB/AcrD/AcrF multidrug efflux protein
BruAb1_0306	BAbS19_I02820	identical	transcriptional regulator, TetR family
BruAb1_0308	BAbS19_I02830	identical	dihydropyrimidine dehydrogenase
BruAb1_0309	BAbS19_I02840	identical	pyridine nucleotide-disulphide oxidoreductase family protein
BruAb1_0310	BAbS19_I02850	identical	hypothetical protein
BruAb1_0311	BAbS19_I02860	identical	glucose-6-phosphate isomerase
BruAb1_0312	BAbS19_I02870	identical	hypothetical protein
BruAb1_0313	BAbS19_I02880	identical	hydrolase, haloacid dehalogenase-like family
BruAb1_0314	BAbS19_I02890	identical	hypothetical protein
BruAb1_0316	BAbS19_I02910	identical	transcriptional regulator, TetR family
BruAb1_0317	BAbS19_I02920	identical	HlyD family secretion protein
BruAb1_0318	BAbS19_I02930	identical	hydrophobe/amphiphile efflux-1 family protein
BruAb1_0319	BAbS19_I02940	identical	hypothetical protein
BruAb1_0320	no match	identical	hypothetical protein
BruAb1_0321	BAbS19_I02950	identical	amino acid ABC transporter, periplasmic amino acid-binding protein
BruAb1_0322	BAbS19_I02960	identical	glycosyl transferase, group 2 family protein
BruAb1_0323	BAbS19_I02970	identical	hypothetical protein
BruAb1_0324	BAbS19_I02980	identical	sensor histidine kinase, hypothetical
BruAb1_0325	BAbS19_I02990	identical	hypothetical protein
BruAb1_0326	BAbS19_I03000	identical	hypothetical protein
BruAb1_0327	BAbS19_I03010	identical	bifunctional N-succinyldiaminopimelate-aminotransferase/acetylornithine transaminase protein
BruAb1_0328	BAbS19_I03020	identical	ornithine carbamoyltransferase
BruAb1_0329	BAbS19_I03030	identical	Hsp33-like chaperonin
BruAb1_0330	BAbS19_I03040	identical	hypothetical protein
BruAb1_0331	BAbS19_I03050	identical	O-succinylhomoserine sulfhydrylase
BruAb1_0332	BAbS19_I03060	identical	2'-deoxycytidine 5'-triphosphate deaminase
BruAb1_0333	BAbS19_I03070	identical	transcriptional regulator, AraC family
BruAb1_0334	BAbS19_I03080	identical	hypothetical protein
BruAb1_0335	BAbS19_I03090	identical	hypothetical protein
BruAb1_0336	BAbS19_I03100	identical	DNA-damage-inducible protein F, hypothetical
BruAb1_0337	BAbS19_I03110	identical	dihydroorotate dehydrogenase
BruAb1_0338	BAbS19_I03120	identical	hypothetical protein
BruAb1_0339	BAbS19_I03130	identical	hypothetical protein
BruAb1_0340	BAbS19_I03140	identical	Pip, proline iminopeptidase
BruAb1_0341	BAbS19_I03150	identical	DNA-binding response regulator, LuxR family
BruAb1_0342	BAbS19_I03160	identical	sensor histidine kinase/response regulator
BruAb1_0343	BAbS19_I03170	identical	hypothetical protein
BruAb1_0344	BAbS19_I03180	identical	MscL, large conductance mechanosensitive channel protein
BruAb1_0345	BAbS19_I03190	identical	5-aminolevulinate synthase
BruAb1_0346	BAbS19_I03200	identical	polysaccharide deacetylase family protein
BruAb1_0348	BAbS19_I03220	identical	hypothetical protein
BruAb1_0349	BAbS19_I03230	identical	hypothetical protein
BruAb1_0350	BAbS19_I03240	identical	transcriptional regulator, LysR family
BruAb1_0351	BAbS19_I03250	identical	hypothetical protein
BruAb1_0352	BAbS19_I03260	identical	hypothetical membrane protein
BruAb1_0354	BAbS19_I03270	identical	lipoprotein, hypothetical
BruAb1_0355	BAbS19_I03280	identical	pantoate--beta-alanine ligase
BruAb1_0356	BAbS19_I03290	identical	3-methyl-2-oxobutanoate hydroxymethyltransferase
BruAb1_0357	BAbS19_I03300	identical	Fpr, ferredoxin--NADP reductase
BruAb1_0358	no match	identical	hypothetical protein
BruAb1_0359	BAbS19_I03320	identical	hypothetical protein
BruAb1_0360	BAbS19_I03330	identical	NspC, carboxynorspermidine decarboxylase
BruAb1_0361	BAbS19_I03340	identical	hypothetical protein
BruAb1_0362	no match	identical	hypothetical protein
BruAb1_0364	BAbS19_I03360	identical	hypothetical protein
BruAb1_0366	BAbS19_I03390	identical	invasion protein B
BruAb1_0367	BAbS19_I03400	identical	sensor histidine kinase
BruAb1_0368	BAbS19_I03410	identical	DNA-binding response regulator, LuxR family
BruAb1_0369	BAbS19_I03420	identical	hypothetical protein
BruAb1_0370	BAbS19_I03430	identical	TRAP dicarboxylate transporter, DctM subunit, hypothetical
BruAb1_0371	BAbS19_I03440	identical	extracellular solute-binding protein, family 7
BruAb1_0372	BAbS19_I03450	identical	hypothetical protein
BruAb1_0373	BAbS19_I03460	identical	hypothetical protein
BruAb1_0374	BAbS19_I03470	identical	hypothetical protein
BruAb1_0375	BAbS19_I03480	identical	xanthine dehydrogenase, hypothetical
BruAb1_0376	BAbS19_I03490	identical	xanthine dehydrogenase
BruAb1_0377	BAbS19_I03510	identical	chaperone XdhC, hypothetical
BruAb1_0378	BAbS19_I03520	identical	transcriptional regulator, LysR family
BruAb1_0379	BAbS19_I03530	identical	hypothetical protein
BruAb1_0380	BAbS19_I03540	identical	guanine deaminase
BruAb1_0381	BAbS19_I03550	identical	hydroxypyruvate reductase, hypothetical
BruAb1_0382	BAbS19_I03560	identical	CcoS, cytochrome oxidase maturation protein
BruAb1_0383	BAbS19_I03570	identical	nitrogen fixation protein FixI, hypothetical
BruAb1_0384	BAbS19_I03580	identical	FixH protein, hypothetical
BruAb1_0385	BAbS19_I03590	identical	iron-sulfur cluster-binding protein
BruAb1_0386	BAbS19_I03600	identical	CcoP, cytochrome c oxidase, cbb3-type, subunit III
BruAb1_0387	BAbS19_I03610	identical	CcoQ, cytochrome c oxidase, cbb3-type, CcoQ subunit
BruAb1_0388	BAbS19_I03620	identical	CcoO, cytochrome c oxidase, cbb3-type, subunit II
BruAb1_0389	BAbS19_I03630	identical	CcoN, cytochrome c oxidase, cbb3-type, subunit I
BruAb1_0390	BAbS19_I03640	identical	transcriptional regulator, Fur family
BruAb1_0391	BAbS19_I03650	identical	hypothetical protein
BruAb1_0392	BAbS19_I03660	identical	twin-arginine translocation signal domain protein
BruAb1_0394	BAbS19_I03680	identical	Ada, ada regulatory protein
BruAb1_0396	BAbS19_I03700	identical	hypothetical protein
BruAb1_0397	BAbS19_I03710	identical	transporter MFS superfamily
BruAb1_0398	BAbS19_I03720	identical	BacA, bacteroid development protein
BruAb1_0400	BAbS19_I03740	identical	hypothetical protein
BruAb1_0401	BAbS19_I03750	identical	GTP-binding protein EngA
BruAb1_0402	BAbS19_I03760	identical	heat shock protein, Hsp70 family
BruAb1_0403	BAbS19_I03770	identical	hypothetical protein
BruAb1_0404	BAbS19_I03780	identical	hypothetical protein
BruAb1_0405	no match	identical	hypothetical protein
BruAb1_0406	BAbS19_I03790	identical	ATP sythase protein I, hypothetical
BruAb1_0407	BAbS19_I03800	identical	ATP synthase subunit A
BruAb1_0408	BAbS19_I03810	identical	ATP synthase subunit C
BruAb1_0409	BAbS19_I03820	identical	ATP synthase subunit B
BruAb1_0410	BAbS19_I03830	identical	ATP synthase subunit B
BruAb1_0411	BAbS19_I03840	identical	ribonuclease HII
BruAb1_0412	BAbS19_I03850	identical	hypothetical protein
BruAb1_0413	BAbS19_I03860	identical	hypothetical protein
BruAb1_0414	BAbS19_I03870	identical	hypothetical protein
BruAb1_0415	BAbS19_I03880	identical	hypothetical protein
BruAb1_0416	no match	identical	hypothetical protein
BruAb1_0417	BAbS19_I03890	identical	hypothetical protein
BruAb1_0418	BAbS19_I03890	identical	IspE, 4-diphosphocytidyl-2C-methyl-D-erythritol kinase
BruAb1_0419	BAbS19_I03900	identical	hypothetical protein
BruAb1_0421	no match	identical	hypothetical protein
BruAb1_0422	BAbS19_I03920	identical	hypothetical protein
BruAb1_0423	BAbS19_I03930	identical	hypothetical protein
BruAb1_0424	BAbS19_I03940	identical	polyprenyl synthetase family protein
BruAb1_0425	BAbS19_I03950	identical	TPR domain protein
BruAb1_0426	BAbS19_I03960	identical	glycyl-tRNA synthetase alpha subunit
BruAb1_0427	BAbS19_I03980	identical	glycyl-tRNA synthetase beta subunit
BruAb1_0428	BAbS19_I03990	identical	Sua5/YciO/YrdC family protein
BruAb1_0429	BAbS19_I04000	identical	oxidoreductase, FAD-binding
BruAb1_0430	BAbS19_I04010	identical	hypothetical protein
BruAb1_0431	BAbS19_I04020	identical	hypothetical protein
BruAb1_0433	BAbS19_I04030	identical	hypothetical protein
BruAb1_0434	BAbS19_I04040	identical	enoyl-CoA hydratase
BruAb1_0435	BAbS19_I04050	identical	acyl-CoA dehydrogenase family protein
BruAb1_0436	BAbS19_I04060	identical	GGDEF domain
BruAb1_0437	BAbS19_I04070	identical	phosphoribosylamine--glycine ligase
BruAb1_0438	BAbS19_I04080	identical	4-hydroxybenzoate octaprenyltransferase
BruAb1_0439	BAbS19_I04090	identical	pyridoxamine 5'-phosphate oxidase
BruAb1_0440	BAbS19_I04100	identical	hypothetical protein
BruAb1_0441	BAbS19_I04110	identical	chaperone protein DnaJ, hypothetical
BruAb1_0442	BAbS19_I04120	identical	hypothetical protein
BruAb1_0444	BAbS19_I04140	identical	phosphoglycerate mutase family
BruAb1_0445	BAbS19_I04150	identical	cold-shock family protein
BruAb1_0447	BAbS19_I04160	identical	hypothetical protein
BruAb1_0448	BAbS19_I04170	identical	hypothetical protein
BruAb1_0449	BAbS19_I04180	identical	hypothetical protein
BruAb1_0450	BAbS19_I04190	identical	chorismate synthase
BruAb1_0452	BAbS19_I04210	identical	histone deacetylase family protein
BruAb1_0453	BAbS19_I04220	identical	exodeoxyribonuclease VII small subunit
BruAb1_0454	BAbS19_I04230	identical	dedA family protein
BruAb1_0455	BAbS19_I04240	identical	transglycosylase-associated protein, hypothetical
BruAb1_0456	BAbS19_I04250	identical	hypothetical protein
BruAb1_0457	BAbS19_I04260	identical	pirin-related protein
BruAb1_0458	BAbS19_I04270	identical	1-deoxy-D-xylulose-5-phosphate synthase
BruAb1_0459	BAbS19_I04280	identical	TlyA, hemolysin A
BruAb1_0460	BAbS19_I04290	identical	RNA methyltransferase hypothetical, TrmA family
BruAb1_0461	BAbS19_I04300	identical	conserved hypothetical protein TIGR00730
BruAb1_0462	BAbS19_I04310	identical	hypothetical protein
BruAb1_0463	BAbS19_I04320	identical	LysM domain protein
BruAb1_0464	BAbS19_I04330	identical	ABC transporter, ATP-binding/permease protein
BruAb1_0465	BAbS19_I04340	identical	phosphatidylserine decarboxylase
BruAb1_0466	BAbS19_I04350	identical	PssA, CDP-diacylglycerol--serine O-phosphatidyltransferase
BruAb1_0467	BAbS19_I04360	identical	oxidoreductase, short-chain dehydrogenase/reductase family
BruAb1_0468	BAbS19_I04370	identical	amidophosphoribosyltransferase
BruAb1_0469	no match	identical	hypothetical protein
BruAb1_0470	BAbS19_I04380	identical	colicin V production protein, hypothetical
BruAb1_0471	BAbS19_I04390	identical	RadA, DNA repair protein RadA
BruAb1_0472	BAbS19_I04400	identical	replicative DNA helicase
BruAb1_0473	BAbS19_I04410	identical	Cfa, cyclopropane-fatty-acyl-phospholipid synthase
BruAb1_0474	BAbS19_I04420	identical	50S ribosomal protein L9
BruAb1_0475	BAbS19_I04430	identical	hypothetical membrane protein
BruAb1_0476	BAbS19_I04440	identical	30S ribosomal protein S18
BruAb1_0477	BAbS19_I04450	identical	30S ribosomal protein S6
BruAb1_0478	no match	identical	hypothetical protein
BruAb1_0479	BAbS19_I04460	identical	acyl-carrier-protein S-malonyltransferase
BruAb1_0480	BAbS19_I04470	identical	3-ketoacyl-(acyl-carrier-protein) reductase
BruAb1_0481	BAbS19_I04480	identical	acyl carrier protein
BruAb1_0482	no match	identical	hypothetical protein
BruAb1_0483	BAbS19_I04490	identical	3-oxoacyl-(acyl carrier protein) synthase
BruAb1_0484	BAbS19_I04500	identical	conserved hypothetical protein TIGR00247
BruAb1_0485	BAbS19_I04510	identical	conserved hypothetical protein TIGR00255
BruAb1_0486	BAbS19_I04520	identical	guanylate kinase
BruAb1_0487	BAbS19_I04530	identical	tldD protein, hypothetical
BruAb1_0488	BAbS19_I04540	identical	hypothetical protein
BruAb1_0489	BAbS19_I04550	identical	CoxB, cytochrome c oxidase, subunit II
BruAb1_0490	BAbS19_I04560	identical	CoxA, cytochrome c oxidase, subunit I
BruAb1_0494	BAbS19_I04600	identical	CoxC, cytochrome c oxidase, subunit III
BruAb1_0496	BAbS19_I04630	identical	SurF1 family protein
BruAb1_0497	BAbS19_I04640	identical	4-hydroxy-3-methylbut-2-enyl diphosphate reductase
BruAb1_0498	BAbS19_I04650	identical	homoserine kinase
BruAb1_0499	BAbS19_I04660	identical	ribonuclease H
BruAb1_0501	BAbS19_I04680	identical	hypothetical protein
BruAb1_0502	BAbS19_I04690	identical	hypothetical protein
BruAb1_0503	BAbS19_I04700	identical	sensory box/GGDEF domain/EAL domain protein
BruAb1_0504	BAbS19_I04710	identical	acetyltransferase, GNAT family
BruAb1_0505	BAbS19_I04720	identical	processing protease
BruAb1_0506	BAbS19_I04730	identical	threonine synthase
BruAb1_0507	BAbS19_I04740	identical	hypothetical protein
BruAb1_0508	BAbS19_I04750	identical	lipoprotein, hypothetical
BruAb1_0509	BAbS19_I04760	identical	EAL domain protein
BruAb1_0510	BAbS19_I04770	identical	hypothetical protein
BruAb1_0511	BAbS19_I04780	identical	hydrolase, haloacid dehalogenase-like family
BruAb1_0512	BAbS19_I04790	identical	voltage gated chloride channel family protein
BruAb1_0513	BAbS19_I04800	identical	BabI, modification methylase BabI
BruAb1_0514	BAbS19_I04810	identical	hydrolase, haloacid dehalogenase-like family
BruAb1_0515	BAbS19_I04820	identical	MutY, A/G-specific adenine glycosylase
BruAb1_0516	BAbS19_I04830	identical	hypothetical protein
BruAb1_0517	BAbS19_I04840	identical	hypothetical protein
BruAb1_0518	BAbS19_I04850	identical	twin-arginine translocation signal domain protein
BruAb1_0521	BAbS19_I04880	identical	glyoxalase family protein
BruAb1_0522	BAbS19_I04890	identical	pyruvate phosphate dikinase
BruAb1_0523	BAbS19_I04900	identical	hypothetical protein
BruAb1_0525	BAbS19_I04910	identical	hypothetical protein
BruAb1_0526	BAbS19_I04920	identical	hypothetical protein
BruAb1_0527	BAbS19_I04930	identical	metallo-beta-lactamase family protein
BruAb1_0528	BAbS19_I04940	identical	BioY family protein
BruAb1_0529	BAbS19_I04950	identical	ureidoglycolate hydrolase
BruAb1_0530	BAbS19_I04960	identical	hypothetical protein
BruAb1_0531	BAbS19_I04970	identical	hypothetical protein
BruAb1_0532	BAbS19_I04980	identical	hypothetical epimerase/dehydratase
BruAb1_0535	BAbS19_I05010 # BAbS19_I05000	identical	P1 ISBm3
BruAb1_0536	no match	identical	hypothetical transposase
BruAb1_0538	BAbS19_I05030	identical	P1 ISBm2
BruAb1_0540	BAbS19_I05060	identical	formyltransferase, hypothetical
BruAb1_0541	BAbS19_I05070	identical	WbkB protein
BruAb1_0542	BAbS19_I05080	identical	RfbE, O-antigen export system ATP-binding protein RfbE
BruAb1_0543	BAbS19_I05090	identical	RfbD, O-antigen export system permease protein
BruAb1_0544	BAbS19_I05100	identical	perosamine synthase, hypothetical
BruAb1_0545	BAbS19_I05110	identical	Gmd, GDP-mannose 4,6-dehydratase
BruAb1_0546	BAbS19_I05120	identical	ISBm1, transposase orfA
BruAb1_0547	BAbS19_I05210	identical	ISBml, transposase orfB
BruAb1_0549	BAbS19_I09250	identical	IS711, transposase orfA
BruAb1_0550	BAbS19_I09260	identical	IS711, transposase orfB
BruAb1_0551	BAbS19_I05210	identical	ISBm1 ORFC
BruAb1_0552	BAbS19_I05170	identical	hypothetical mannosyltransferase
BruAb1_0553	BAbS19_I05180	identical	transposase orfA IS5 family element
BruAb1_0557	BAbS19_I05210	identical	transposase orfB
BruAb1_0561	BAbS19_I05240	identical	mannose-1-phosphate guanylyltransferase/mannose-6-phosphate isomerase
BruAb1_0562	BAbS19_I05250	identical	ManA, mannose-6-phosphate isomerase
BruAb1_0563	BAbS19_I05260	identical	glycosyl transferase
BruAb1_0564	BAbS19_I05270	identical	RbsA-1, ribose ABC transporter
BruAb1_0565	BAbS19_I05280	identical	RbsC-1, ribose ABC transporter
BruAb1_0566	BAbS19_I05290	identical	RbsB-1, ribose ABC transporter
BruAb1_0567	BAbS19_I05300	identical	hypothetical protein
BruAb1_0568	BAbS19_I05310	identical	oxidoreductase
BruAb1_0569	BAbS19_I05320	identical	xylose isomerase
BruAb1_0570	BAbS19_I05330	identical	XylB, xylulokinase
BruAb1_0571	BAbS19_I05340	identical	transcriptional regulator
BruAb1_0573	no match	identical	hypothetical protein
BruAb1_0574	BAbS19_I05370	identical	BetB, betaine aldehyde dehydrogenase
BruAb1_0576	BAbS19_I05390	identical	transcriptional regulator BetI
BruAb1_0577	BAbS19_I05400	identical	hypothetical protein
BruAb1_0578	BAbS19_I05410	identical	transcription elongation factor
BruAb1_0579	BAbS19_I05420	identical	death-on-curing family protein
BruAb1_0580	BAbS19_I05430	identical	transcriptional regulator, AbrB family
BruAb1_0581	BAbS19_I05440	identical	transporter
BruAb1_0584	BAbS19_I05480	identical	hypothetical protein
BruAb1_0585	BAbS19_I05490	identical	hypothetical protein
BruAb1_0586	BAbS19_I05500	identical	hypothetical protein
BruAb1_0587	BAbS19_I05510	identical	haloacid dehalogenase
BruAb1_0588	BAbS19_I05520	identical	Fe-Mn superoxide dismutase
BruAb1_0589	BAbS19_I05530	identical	hypothetical protein
BruAb1_0590	BAbS19_I05540	identical	PtrB, protease
BruAb1_0591	BAbS19_I05550	identical	transcriptional regulator
BruAb1_0592	BAbS19_I05560	identical	hypothetical protein
BruAb1_0593	BAbS19_I05570	identical	hypothetical protein
BruAb1_0594	BAbS19_I05580	identical	hypothetical protein
BruAb1_0595	BAbS19_I05590	identical	amidase
BruAb1_0596	BAbS19_I05600	identical	hypothetical protein
BruAb1_0597	BAbS19_I05610	identical	hypothetical protein
BruAb1_0598	BAbS19_I05620	identical	sensor histidine kinase
BruAb1_0599	BAbS19_I05630	identical	hypothetical peptidoglycan-binding protein
BruAb1_0600	BAbS19_I05640	identical	hypothetical protein
BruAb1_0601	BAbS19_I05650	identical	hypothetical protein
BruAb1_0602	BAbS19_I05660	identical	hypothetical protein
BruAb1_0603	BAbS19_I05670	identical	hypothetical protein
BruAb1_0604	BAbS19_I05680	identical	penicillin-binding protein
BruAb1_0605	BAbS19_I05690	identical	hypothetical protein
BruAb1_0607	BAbS19_I05710	identical	portal protein
BruAb1_0608	BAbS19_I05720	identical	hypothetical protein
BruAb1_0609	BAbS19_I05730	identical	hypothetical protease
BruAb1_0610	BAbS19_I05740	identical	major capsid protein
BruAb1_0611	BAbS19_I05750	identical	hypothetical protein
BruAb1_0612	BAbS19_I05760	identical	hypothetical protein
BruAb1_0613	BAbS19_I05770	identical	hypothetical protein
BruAb1_0614	BAbS19_I05780	identical	hypothetical protein
BruAb1_0615	BAbS19_I05790	identical	hypothetical protein
BruAb1_0617	BAbS19_I05810	identical	hypothetical protein
BruAb1_0619	BAbS19_I05830	identical	NLP/P60 family protein
BruAb1_0621	BAbS19_I05860	identical	hypothetical protein
BruAb1_0622	BAbS19_I05870	identical	hypothetical protein
BruAb1_0623	BAbS19_I05880	identical	DNA-binding response regulator
BruAb1_0625	BAbS19_I05900	identical	outer membrane lipoprotein-related protein
BruAb1_0626	BAbS19_I05910	identical	hypothetical cytochrome c-type biogenesis protein
BruAb1_0627	BAbS19_I05920	identical	CcmE, cytochrome c-type biogenesis protein CcmE
BruAb1_0628	BAbS19_I05930	identical	CcmF, cytochrome c-type biogenesis protein CcmF
BruAb1_0629	BAbS19_I05940	identical	CcmH, cytochrome c-type biogenesis protein CcmH
BruAb1_0630	BAbS19_I05950	identical	serine protease
BruAb1_0633	BAbS19_I05980	identical	GlnE, glutamate-ammonia-ligase adenylyltransferase
BruAb1_0634	BAbS19_I05990	identical	hypothetical membrane protein
BruAb1_0636	BAbS19_I06010	identical	PepN, aminopeptidase N
BruAb1_0637	BAbS19_I06020	identical	hypothetical membrane protein
BruAb1_0638	BAbS19_I06030	identical	transporter
BruAb1_0639	BAbS19_I06040	identical	phage SPO1 DNA polymerase-related protein
BruAb1_0640	BAbS19_I06050	identical	electron transfer flavoprotein, oxidoreductase
BruAb1_0641	BAbS19_I06060	identical	AP endonuclease family 1 domain protein
BruAb1_0642	BAbS19_I06070	identical	AMP nucleosidase
BruAb1_0643	no match	identical	hypothetical protein
BruAb1_0644	BAbS19_I06080	identical	hypothetical protein
BruAb1_0645	BAbS19_I06090	identical	glutathione S-transferase family protein
BruAb1_0646	BAbS19_I06100	identical	hypothetical protein
BruAb1_0647	BAbS19_I06110	identical	hypothetical protein
BruAb1_0648	BAbS19_I06120	identical	hypothetical protein
BruAb1_0649	BAbS19_I06130	identical	hypothetical protein
BruAb1_0650	no match	identical	hypothetical protein
BruAb1_0651	BAbS19_I06140	identical	hypothetical protein
BruAb1_0652	BAbS19_I06150	identical	hypothetical protein
BruAb1_0653	BAbS19_I06160	identical	histidinol-phosphate aminotransferase
BruAb1_0654	BAbS19_I06170	identical	site-specific recombinase, phage integrase family
BruAb1_0655	BAbS19_I06180	identical	Omp2a, porin
BruAb1_0656	no match	identical	hypothetical protein
BruAb1_0658	BAbS19_I06200	identical	hypothetical protein
BruAb1_0659	no match	identical	hypothetical protein
BruAb1_0660	BAbS19_I06210	identical	hypothetical protein
BruAb1_0661	BAbS19_I06220	identical	transglycosylase SLT domain protein
BruAb1_0662	no match	identical	hypothetical protein
BruAb1_0663	BAbS19_I06230	identical	dihydrodipicolinate synthase
BruAb1_0664	BAbS19_I06240	identical	SsrA-binding protein
BruAb1_0665	BAbS19_I06250	identical	SPO1 DNA polymerase-related protein
BruAb1_0666	BAbS19_I06260	identical	hypothetical protein
BruAb1_0667	BAbS19_I06270	identical	hypothetical protein
BruAb1_0668	BAbS19_I06280	identical	DNA-directed RNA polymerase omega subunit
BruAb1_0669	BAbS19_I06290	identical	RelA/SpoT family protein
BruAb1_0670	BAbS19_I06300	identical	orotate phosphoribosyltransferase
BruAb1_0672	BAbS19_I06320	identical	coproporphyrinogen III oxidase
BruAb1_0673	BAbS19_I06330	identical	Fsr, fosmidomycin resistance protein
BruAb1_0674	BAbS19_I06340	identical	transcriptional regulator, AraC family
BruAb1_0675	BAbS19_I06350	identical	hypothetical protein
BruAb1_0676	BAbS19_I06360	identical	4'-phosphopantetheinyl transferase
BruAb1_0677	BAbS19_I06370	identical	signal peptidase I
BruAb1_0678	BAbS19_I06380	identical	ribonuclease III
BruAb1_0679	no match	identical	hypothetical protein
BruAb1_0680	BAbS19_I06390	identical	GTP-binding protein Era
BruAb1_0681	BAbS19_I06400	identical	DNA repair protein RecO
BruAb1_0682	BAbS19_I06410	identical	hypothetical protein
BruAb1_0683	BAbS19_I06420	identical	hypothetical protein
BruAb1_0684	BAbS19_I06430	identical	aminomethyltransferase, hypothetical
BruAb1_0685	BAbS19_I06440	identical	dihydroorotase
BruAb1_0686	BAbS19_I06450	identical	hypothetical protein
BruAb1_0687	BAbS19_I06460	identical	hypothetical protein
BruAb1_0688	BAbS19_I06470	identical	hypothetical protein
BruAb1_0689	BAbS19_I06480	identical	MutT/nudix family protein
BruAb1_0690	BAbS19_I06490	identical	hypothetical protein
BruAb1_0691	BAbS19_I06500	identical	transporter, LysE family
BruAb1_0692	BAbS19_I06510	identical	hypothetical protein
BruAb1_0693	BAbS19_I06520	identical	hypothetical protein
BruAb1_0694	BAbS19_I06530	identical	cysteinyl-tRNA synthetase
BruAb1_0695	no match	identical	hypothetical protein
BruAb1_0696	no match	identical	hypothetical protein
BruAb1_0697	no match	identical	hypothetical protein
BruAb1_0698	BAbS19_I06540	identical	2-isopropylmalate synthase
BruAb1_0699	BAbS19_I06550	identical	RarD, RarD protein
BruAb1_0700	BAbS19_I06560	identical	peptidase, M23/M37 family
BruAb1_0702	BAbS19_I06580	identical	4-hydroxythreonine-4-phosphate dehydrogenase
BruAb1_0703	BAbS19_I06590	identical	peptidyl-prolyl cis-trans isomerase, hypothetical
BruAb1_0704	BAbS19_I06600	identical	organic solvent tolerance, hypothetical
BruAb1_0705	BAbS19_I06610	identical	hypothetical protein
BruAb1_0706	BAbS19_I06620	identical	hypothetical membrane protein
BruAb1_0707	no match	identical	hypothetical protein
BruAb1_0708	BAbS19_I06630	identical	leucyl aminopeptidase
BruAb1_0709	BAbS19_I06640	identical	DNA polymerase III subunit chi
BruAb1_0710	BAbS19_I06650	identical	hypothetical protein
BruAb1_0711	BAbS19_I06660	identical	ABC transporter, ATP-binding protein
BruAb1_0712	BAbS19_I06670	identical	hypothetical protein
BruAb1_0713	BAbS19_I06680	identical	nucleoside diphosphate kinase
BruAb1_0714	BAbS19_I06690	identical	hypothetical protein
BruAb1_0715	BAbS19_I06700	identical	MoaE, molybdopterin converting factor, subunit 2
BruAb1_0716	BAbS19_I06710	identical	MoaD, molybdopterin converting factor, subunit 1
BruAb1_0717	BAbS19_I06720	identical	PgsA, CDP-diacylglycerol--glycerol-3-phosphate 3-phosphatidyltransferase
BruAb1_0718	BAbS19_I06730	identical	excinuclease ABC subunit C
BruAb1_0720	BAbS19_I06750	identical	outer-membrane protein, 25 kDa
BruAb1_0721	BAbS19_I06760	identical	glutathione S-transferase family protein
BruAb1_0722	BAbS19_I06770	identical	ribonuclease T2 family protein
BruAb1_0723	BAbS19_I06780	identical	hypothetical protein
BruAb1_0725	BAbS19_I06800	identical	hypothetical membrane protein
BruAb1_0726	BAbS19_I06810	identical	oxidoreductase, molybdopterin-binding, hypothetical
BruAb1_0727	BAbS19_I06820	identical	hypothetical protein
BruAb1_0728	BAbS19_I06830	identical	phosphoribosylglycinamide formyltransferase
BruAb1_0729	BAbS19_I06840	identical	phosphoribosylaminoimidazole synthetase
BruAb1_0730	BAbS19_I06850	identical	hypothetical protein
BruAb1_0732	BAbS19_I06870	identical	epimerase/dehydratase family protein, hypothetical
BruAb1_0733	BAbS19_I06880	identical	hypothetical protein
BruAb1_0734	BAbS19_I06890	identical	oxidoreductase, short-chain dehydrogenase/reductase family
BruAb1_0735	BAbS19_I06900	identical	hypothetical protein
BruAb1_0736	BAbS19_I06910	identical	hypothetical protein
BruAb1_0737	BAbS19_I06920	identical	LldP, L-lactate permease
BruAb1_0738	BAbS19_I06930	identical	oxidoreductase, hypothetical
BruAb1_0739	BAbS19_I06940	identical	hypothetical protein
BruAb1_0740	BAbS19_I06950	identical	exonuclease, hypothetical
BruAb1_0741	BAbS19_I06960	identical	adenylate kinase, hypothetical
BruAb1_0742	BAbS19_I06970	identical	acetyltransferase, GNAT family
BruAb1_0743	BAbS19_I06980	identical	transcriptional regulator, Cro/CI family
BruAb1_0744	no match	identical	hypothetical protein
BruAb1_0745	no match	identical	hypothetical protein
BruAb1_0746	BAbS19_I06990	identical	transposase, hypothetical
BruAb1_0749	BAbS19_I07030	identical	hypothetical protein
BruAb1_0750	BAbS19_I07040	identical	hypothetical protein
BruAb1_0752	BAbS19_I07080	identical	hypothetical protein
BruAb1_0754	no match	identical	lipoprotein, hypothetical
BruAb1_0755	BAbS19_I07100	identical	hypothetical protein
BruAb1_0756	BAbS19_I07110	identical	cystathionine beta-lyase
BruAb1_0757	BAbS19_I07120	identical	PAP2 family protein
BruAb1_0759	no match	identical	hypothetical protein
BruAb1_0762	BAbS19_I07180	identical	amino acid ABC transporter, ATP-binding protein
BruAb1_0763	BAbS19_I07190	identical	salicylate hydroxylase
BruAb1_0764	BAbS19_I07200	identical	hypothetical protein
BruAb1_0765	BAbS19_I07210	identical	polyphosphate kinase
BruAb1_0766	BAbS19_I07220	identical	phosphatase, Ppx/GppA family
BruAb1_0767	BAbS19_I07230	identical	Rnd, ribonuclease D
BruAb1_0768	BAbS19_I07240	identical	aspartyl-tRNA synthetase
BruAb1_0769	BAbS19_I07250	identical	hypothetical protein
BruAb1_0770	no match	identical	hypothetical protein
BruAb1_0771	BAbS19_I07260	identical	DNA topoisomerase IV subunit A
BruAb1_0773	BAbS19_I07280	identical	hypothetical protein
BruAb1_0774	BAbS19_I07290	identical	delta-aminolevulinic acid dehydratase
BruAb1_0775	BAbS19_I07300	identical	enoyl-CoA hydratase
BruAb1_0776	BAbS19_I07310	identical	hypothetical protein
BruAb1_0777	BAbS19_I07320	identical	transcriptional regulator, MarR Family
BruAb1_0778	BAbS19_I07330	identical	hypothetical protein
BruAb1_0779	BAbS19_I07340	identical	peptidoglycan-binding protein, hypothetical
BruAb1_0780	BAbS19_I07350	identical	hypothetical protein
BruAb1_0781	BAbS19_I07360	identical	serine hydroxymethyltransferase
BruAb1_0782	BAbS19_I07370	identical	hypothetical protein
BruAb1_0784	BAbS19_I07390	identical	riboflavin synthase subunit alpha
BruAb1_0785	BAbS19_I07400	identical	riboflavin synthase subunit beta
BruAb1_0786	BAbS19_I07410	identical	transcription antitermination protein NusB
BruAb1_0787	BAbS19_I07420	identical	membrane-bound proton-translocating pyrophosphatase
BruAb1_0788	BAbS19_I07430	identical	hypothetical protein
BruAb1_0789	BAbS19_I07440	identical	hypothetical protein
BruAb1_0790	BAbS19_I07450	identical	hypothetical protein
BruAb1_0791	BAbS19_I07460	identical	fatty acid/phospholipid synthesis protein
BruAb1_0792	BAbS19_I07470	identical	3-oxoacyl-(acyl carrier protein) synthase
BruAb1_0793	BAbS19_I07480	identical	integration host factor alpha subunit
BruAb1_0794	BAbS19_I07490	identical	hypothetical protein
BruAb1_0795	BAbS19_I07500	identical	SugE, SugE protein
BruAb1_0796	BAbS19_I07510	identical	bacterial sugar transferase
BruAb1_0797	no match	identical	hypothetical protein
BruAb1_0798	BAbS19_I07520	identical	capsule polysaccharide export protein, hypothetical
BruAb1_0799	BAbS19_I07530	identical	hypothetical protein
BruAb1_0800	BAbS19_I07540	identical	hypothetical protein
BruAb1_0801	BAbS19_I07550	identical	cytochrome c oxidase assembly protein, hypothetical
BruAb1_0802	BAbS19_I07560	identical	N-acetyl-gamma-glutamyl-phosphate reductase
BruAb1_0803	BAbS19_I07570	identical	agmatinase, hypothetical
BruAb1_0804	BAbS19_I07580	identical	30S ribosomal protein S9
BruAb1_0805	BAbS19_I07590	identical	50S ribosomal protein L13
BruAb1_0806	BAbS19_I07600	identical	hypothetical protein
BruAb1_0807	BAbS19_I07610	identical	O-acetylhomoserine sulfhydrylase
BruAb1_0809	no match	identical	hypothetical protein
BruAb1_0810	no match	identical	hypothetical protein
BruAb1_0811	no match	identical	hypothetical protein
BruAb1_0812	no match	identical	hypothetical protein
BruAb1_0813	BAbS19_I07630	identical	hypothetical protein
BruAb1_0815	BAbS19_I07650	identical	hypothetical protein
BruAb1_0816	BAbS19_I07660	identical	NADH dehydrogenase alpha subunit
BruAb1_0817	BAbS19_I07670	identical	NADH dehydrogenase beta subunit
BruAb1_0818	BAbS19_I07680	identical	NADH dehydrogenase subunit C
BruAb1_0819	BAbS19_I07690	identical	NADH dehydrogenase delta subunit
BruAb1_0822	BAbS19_I07720	identical	NADH dehydrogenase gamma subunit
BruAb1_0823	BAbS19_I07730	identical	NADH dehydrogenase subunit H
BruAb1_0824	BAbS19_I07740	identical	NADH dehydrogenase subunit I
BruAb1_0825	BAbS19_I07750	identical	NADH dehydrogenase subunit J
BruAb1_0826	BAbS19_I07760	identical	NADH dehydrogenase kappa subunit
BruAb1_0827	BAbS19_I07770	identical	NADH dehydrogenase subunit L
BruAb1_0828	BAbS19_I07780	identical	NADH dehydrogenase subunit M
BruAb1_0829	BAbS19_I07790	identical	NADH dehydrogenase subunit N
BruAb1_0830	BAbS19_I07800	identical	biotin--protein ligase
BruAb1_0831	BAbS19_I07810	identical	metallo-beta-lactamase family protein
BruAb1_0832	BAbS19_I07820	identical	glyoxalase family protein
BruAb1_0833	BAbS19_I07830	identical	hypothetical protein
BruAb1_0834	no match	identical	hypothetical protein
BruAb1_0835	no match	identical	hypothetical protein
BruAb1_0836	BAbS19_I07840	identical	prolyl-tRNA synthetase
BruAb1_0837	BAbS19_I07850	identical	ABC transporter, permease protein
BruAb1_0838	BAbS19_I07860	identical	LolD, lipoprotein releasing system ATP-binding protein
BruAb1_0839	BAbS19_I07870	identical	DNA polymerase III subunit alpha
BruAb1_0840	BAbS19_I07880	identical	hypothetical protein
BruAb1_0843	BAbS19_I07930	identical	30S ribosomal protein S4
BruAb1_0844	BAbS19_I07940	identical	hypothetical protein
BruAb1_0845	BAbS19_I07950	identical	inositol monophosphatase family protein
BruAb1_0846	BAbS19_I07960	identical	drug resistance transporter, Bcr/CflA family
BruAb1_0847	no match	identical	hypothetical protein
BruAb1_0848	BAbS19_I07970	identical	glutaredoxin-related protein
BruAb1_0849	BAbS19_I07980	identical	bolA-related protein
BruAb1_0850	BAbS19_I07990	identical	phosphoribosylformylglycinamidine synthase subunit II
BruAb1_0851	BAbS19_I08000	identical	hypothetical lipoprotein
BruAb1_0852	BAbS19_I08010	identical	glutathione S-transferase family protein
BruAb1_0853	BAbS19_I08020	identical	phosphoribosylformylglycinamidine synthase subunit I
BruAb1_0854	BAbS19_I08030	identical	phosphoribosylformylglycinamidine synthase
BruAb1_0855	BAbS19_I08040	identical	phosphoribosylaminoimidazole-succinocarboxamide synthase
BruAb1_0856	BAbS19_I08050	identical	hypothetical protein
BruAb1_0857	BAbS19_I08060	identical	hydroxyacid aldolase, hypothetical
BruAb1_0858	BAbS19_I08070	identical	hypothetical protein
BruAb1_0859	no match	identical	hypothetical protein
BruAb1_0860	BAbS19_I08080	identical	glyoxalase family protein
BruAb1_0861	BAbS19_I08090	identical	adenylosuccinate lyase
BruAb1_0862	BAbS19_I08100	identical	Rpe, ribulose-phosphate 3-epimerase
BruAb1_0863	BAbS19_I08110	identical	lipid A biosynthesis lauroyl acyltransferase
BruAb1_0864	BAbS19_I08120	identical	alcohol dehydrogenase, zinc-containing
BruAb1_0865	BAbS19_I08130	identical	3-oxoacyl-(acyl carrier protein) synthase
BruAb1_0866	BAbS19_I08140	identical	3-oxoacyl-(acyl carrier protein) synthase
BruAb1_0867	BAbS19_I08150	identical	acyl carrier protein
BruAb1_0868	BAbS19_I08160	identical	hypothetical protein
BruAb1_0869	BAbS19_I08170	identical	GalM, aldose 1-epimerase
BruAb1_0870	BAbS19_I08180	identical	hypothetical 2-dehydro-3-deoxygluconokinase
BruAb1_0871	BAbS19_I08190	identical	hypothetical protein
BruAb1_0872	BAbS19_I08200	identical	PhnM, PhnM protein
BruAb1_0873	BAbS19_I08210	identical	hydrolase, haloacid dehalogenase-like family
BruAb1_0876	BAbS19_I08240	identical	hypothetical protein
BruAb1_0877	BAbS19_I08250	identical	hypothetical protein
BruAb1_0878	BAbS19_I08260	identical	cobalamin synthase
BruAb1_0880	BAbS19_I08280	identical	transcriptional regulator, AsnC family
BruAb1_0881	BAbS19_I08290	identical	hypothetical protein
BruAb1_0883	BAbS19_I08300	identical	hypothetical protein
BruAb1_0884	BAbS19_I08310	identical	ExoR, exopolysacchride production negative regulator
BruAb1_0885	BAbS19_I08320	identical	Xth-1, exodeoxyribonuclease III
BruAb1_0886	BAbS19_I08330	identical	hypothetical protein
BruAb1_0887	BAbS19_I08340	identical	HesB/YadR/YfhF family protein
BruAb1_0888	BAbS19_I08350	identical	deoxyguanosinetriphosphate triphosphohydrolase-like protein
BruAb1_0889	BAbS19_I08360	identical	arginyl-tRNA synthetase
BruAb1_0890	BAbS19_I08370	identical	hypothetical protein
BruAb1_0891	BAbS19_I08380	identical	glycosyl hydrolase, family 3
BruAb1_0892	BAbS19_I08390	identical	hypothetical protein
BruAb1_0893	BAbS19_I08400	identical	conserved hypothetical protein TIGR00281
BruAb1_0894	BAbS19_I08410	identical	twin argininte translocase protein A
BruAb1_0895	BAbS19_I08420	identical	sec-independent translocase
BruAb1_0896	BAbS19_I08430	identical	TatC, Sec-independent protein translocase protein TatC
BruAb1_0897	BAbS19_I08440	identical	seryl-tRNA synthetase
BruAb1_0898	BAbS19_I08450	identical	acid phosphatase
BruAb1_0899	BAbS19_I08460	identical	protein-L-isoaspartate O-methyltransferase
BruAb1_0900	BAbS19_I08470	identical	peptidase, M23/M37 family
BruAb1_0901	BAbS19_I08480	identical	hypothetical protein
BruAb1_0902	BAbS19_I08490	identical	preprotein translocase, YajC subunit
BruAb1_0903	BAbS19_I08500	identical	protein-export membrane protein, SecD/SecF family
BruAb1_0904	BAbS19_I08510	identical	hypothetical protein
BruAb1_0905	BAbS19_I08520	identical	hypothetical protein
BruAb1_0906	BAbS19_I08530	identical	glucose-inhibited division protein A
BruAb1_0907	BAbS19_I08540	identical	hypothetical protein
BruAb1_0908	BAbS19_I08550	identical	hypothetical membrane protein
BruAb1_0909	BAbS19_I08560	identical	hypothetical protein
BruAb1_0910	BAbS19_I08570	identical	trigger factor
BruAb1_0911	BAbS19_I08580	identical	aspartyl/glutamyl-tRNA amidotransferase subunit B
BruAb1_0914	BAbS19_I08610	identical	hypothetical protein
BruAb1_0915	BAbS19_I08620	identical	hypothetical protein
BruAb1_0916	BAbS19_I08630	identical	Aat, leucyl/phenylalanyl-tRNA--protein transferase
BruAb1_0917	BAbS19_I08640	identical	acetyl-CoA carboxylase
BruAb1_0918	BAbS19_I08650	identical	acetyl-CoA carboxylase
BruAb1_0919	BAbS19_I08660	identical	3-dehydroquinate dehydratase
BruAb1_0920	BAbS19_I08670	identical	outer membrane protein, hypothetical
BruAb1_0921	BAbS19_I08680	identical	hypothetical protein
BruAb1_0922	BAbS19_I08690	identical	aminotransferase, class I
BruAb1_0923	BAbS19_I08700	identical	ribonuclease, Rne/Rng domain protein
BruAb1_0924	no match	identical	hypothetical protein
BruAb1_0925	BAbS19_I08710	identical	N-acetylmuramoyl-L-alanine amidase, family 3
BruAb1_0926	BAbS19_I08720	identical	penicillin-binding protein 1A, hypothetical
BruAb1_0927	BAbS19_I08730	identical	peptide chain release factor 2
BruAb1_0928	BAbS19_I08750	identical	Transposase orfA
BruAb1_0930	BAbS19_I08770	identical	hypothetical protein
BruAb1_0931	BAbS19_I08780	identical	hypothetical protein
BruAb1_0932	BAbS19_I08790	identical	hypothetical protein
BruAb1_0933	BAbS19_I08800	identical	Bcp, bacterioferritin comigratory protein
BruAb1_0934	BAbS19_I08810	identical	hypothetical protein
BruAb1_0935	BAbS19_I08820	identical	tyrosyl-tRNA synthetase
BruAb1_0936	BAbS19_I08830	identical	hypothetical protein
BruAb1_0937	BAbS19_I08840	identical	QacH, quaternary ammonium compound-resistance protein
BruAb1_0938	BAbS19_I08850	identical	hypothetical protein
BruAb1_0939	BAbS19_I08860	identical	cysteine desulfurase, hypothetical
BruAb1_0940	BAbS19_I08870	identical	hypothetical protein
BruAb1_0941	BAbS19_I08880	identical	ABC transporter, ATP-binding protein
BruAb1_0942	BAbS19_I08890	identical	hypothetical protein
BruAb1_0943	BAbS19_I08900	identical	aminotransferase, class V
BruAb1_0944	BAbS19_I08910	identical	hypothetical protein
BruAb1_0946	BAbS19_I08930	identical	hypothetical protein
BruAb1_0947	BAbS19_I08940	identical	ATP-dependent RNA helicase, DEAD/DEAH box family
BruAb1_0948	BAbS19_I08950	identical	HesB/YadR/YfhF family protein
BruAb1_0950	no match	identical	hypothetical protein
BruAb1_0951	BAbS19_I08980	identical	heavy-metal-associated domain protein
BruAb1_0953	BAbS19_I08990	identical	protein-L-isoaspartate O-methyltransferase, hypothetical
BruAb1_0955	BAbS19_I09010	identical	hypothetical protein
BruAb1_0956	no match	identical	hypothetical protein
BruAb1_0957	BAbS19_I09020	identical	valyl-tRNA synthetase
BruAb1_0963	BAbS19_I09080	identical	MobA, molybdopterin-guanine dinucleotide biosynthesis protein A
BruAb1_0964	BAbS19_I09090	identical	molybdenum cofactor biosynthesis protein A
BruAb1_0965	BAbS19_I09100	identical	hypothetical protein
BruAb1_0967	BAbS19_I09120	identical	FumB, fumarate hydratase, class I
BruAb1_0969	no match	identical	hypothetical protein
BruAb1_0970	BAbS19_I09150	identical	hypothetical protein
BruAb1_0971	no match	identical	hypothetical protein
BruAb1_0972	BAbS19_I09160	identical	site-specific recombinase, phage integrase family
BruAb1_0973	BAbS19_I09170	identical	hypothetical protein
BruAb1_0974	BAbS19_I09180	identical	hypothetical protein
BruAb1_0975	BAbS19_I09190	identical	hypothetical protein
BruAb1_0978	no match	identical	hypothetical protein
BruAb1_0979	no match	identical	hypothetical protein
BruAb1_0980	BAbS19_I09220	identical	hypothetical protein
BruAb1_0981	BAbS19_I09230	identical	hypothetical protein
BruAb1_0983	BAbS19_I09250	identical	IS711, transposase orfA
BruAb1_0984	BAbS19_I09260	identical	IS711, transposase orfB
BruAb1_0986	BAbS19_I09290	identical	hypothetical protein
BruAb1_0987	BAbS19_I09300	identical	glycosyl transferase WboA
BruAb1_0988	BAbS19_I09310	identical	glycosyl transferase, group 1 family protein
BruAb1_0989	no match	identical	hypothetical protein
BruAb1_0990	BAbS19_I09320	identical	secretion activator protein, hypothetical
BruAb1_0991	no match	identical	hypothetical protein
BruAb1_0993	BAbS19_I09340	identical	hypothetical protein
BruAb1_0994	no match	identical	hypothetical protein
BruAb1_0995	BAbS19_I09350	identical	arsenate reductase ArsC, hypothetical
BruAb1_0996	BAbS19_I09360	identical	rare lipoprotein A family protein
BruAb1_0997	BAbS19_I09370	identical	D-alanyl-D-alanine carboxypeptidase
BruAb1_0998	BAbS19_I09380	identical	Tmk, thymidylate kinase
BruAb1_0999	BAbS19_I09390	identical	DNA polymerase III subunit delta
BruAb1_1000	no match	identical	hypothetical protein
BruAb1_1001	BAbS19_I09400	identical	methionine--tRNA ligase
BruAb1_1002	BAbS19_I09410	identical	hydrolase, TatD family
BruAb1_1003	BAbS19_I09420	identical	hypothetical protein
BruAb1_1004	BAbS19_I09430	identical	beta-(1--2)glucan export ATP-binding protein
BruAb1_1005	BAbS19_I09440	identical	ribosomal large subunit pseudouridine synthase C
BruAb1_1007	BAbS19_I09460	identical	hydrolase, haloacid dehalogenase-like family
BruAb1_1008	BAbS19_I09470	identical	hypothetical protein
BruAb1_1009	BAbS19_I09480	identical	GlnA, glutamine synthetase, type I
BruAb1_1010	BAbS19_I09490	identical	GlnB, nitrogen regulatory protein P-II
BruAb1_1011	BAbS19_I09500	identical	YjeF family protein
BruAb1_1012	BAbS19_I09510	identical	hypothetical protein
BruAb1_1013	BAbS19_I09520	identical	phosphoglycolate phosphatase
BruAb1_1015	BAbS19_I09540	identical	ribose-5-phosphate isomerase A
BruAb1_1016	BAbS19_I09550	identical	hypothetical protein
BruAb1_1017	BAbS19_I09560	identical	glutathione reductase
BruAb1_1019	BAbS19_I09580	identical	DgkA, diacylglycerol kinase
BruAb1_1020	BAbS19_I09590	identical	NAD(+) synthase
BruAb1_1021	BAbS19_I09600	identical	glutamyl-tRNA synthetase
BruAb1_1022	BAbS19_I09620	identical	phosphate acetyltransferase
BruAb1_1023	BAbS19_I09630	identical	mandelate racemase/muconate lactonizing enzyme family protein
BruAb1_1024	BAbS19_I09640	identical	hypothetical toulene ABC transporter, permease protein
BruAb1_1025	BAbS19_I09650	identical	ABC transporter, ATP-binding protein
BruAb1_1026	BAbS19_I09660	identical	ABC transporter, periplasmic substrate-binding protein
BruAb1_1027	BAbS19_I09670	identical	lipoprotein, hypothetical
BruAb1_1028	no match	identical	hypothetical protein
BruAb1_1030	BAbS19_I09690	identical	hypothetical protein
BruAb1_1031	BAbS19_I09700	identical	ferredoxin, 2Fe-2S
BruAb1_1033	BAbS19_I09720	identical	hypothetical protein
BruAb1_1034	BAbS19_I09730	identical	FolP, dihydropteroate synthase
BruAb1_1035	BAbS19_I09740	identical	FolB, dihydroneopterin aldolase
BruAb1_1036	BAbS19_I09750	identical	FolK, 2-amino-4-hydroxy-6-hydroxymethyldihydropteridine pyrophosphokinase
BruAb1_1037	BAbS19_I09760	identical	hypothetical protein
BruAb1_1038	BAbS19_I09770	identical	hypothetical protein
BruAb1_1039	BAbS19_I09780	identical	hypothetical protein
BruAb1_1040	BAbS19_I09790	identical	hypothetical protein
BruAb1_1042	no match	identical	hypothetical protein
BruAb1_1043	BAbS19_I09810	identical	hypothetical protein
BruAb1_1044	BAbS19_I09820	identical	sensory box histidine kinase/response regulator
BruAb1_1045	BAbS19_I09830	identical	hypothetical protein
BruAb1_1046	BAbS19_I09840	identical	hypothetical protein
BruAb1_1047	BAbS19_I09850	identical	hypothetical protein
BruAb1_1048	BAbS19_I09860	identical	ribonucleotide-diphosphate reductase alpha subunit
BruAb1_1049	no match	identical	hypothetical protein
BruAb1_1050	BAbS19_I09870	identical	MutT/nudix family protein
BruAb1_1052	BAbS19_I09890	identical	hypothetical protein
BruAb1_1053	BAbS19_I09900	identical	cinA-related protein
BruAb1_1054	BAbS19_I09910	identical	TrpR binding protein WrbA
BruAb1_1055	BAbS19_I09920	identical	hypothetical protein
BruAb1_1056	BAbS19_I09930	identical	threonine dehydratase
BruAb1_1057	BAbS19_I09940	identical	ATP-dependent RNA helicase, DEAD/DEAH box family
BruAb1_1058	BAbS19_I09950	identical	cysteine synthase
BruAb1_1059	BAbS19_I09960	identical	hypothetical protein
BruAb1_1060	BAbS19_I09970	identical	rhodanese family protein
BruAb1_1061	BAbS19_I09980	identical	acetyltransferase, GNAT family
BruAb1_1062	BAbS19_I09990	identical	acetyl-CoA hydrolase/transferase family protein
BruAb1_1069	BAbS19_I10080	identical	sodium/bile acid symporter family
BruAb1_1070	no match	identical	hypothetical protein
BruAb1_1071	BAbS19_I10090	identical	GalE-1, UDP-glucose 4-epimerase
BruAb1_1072	BAbS19_I10100	identical	mazG family protein
BruAb1_1073	BAbS19_I10110	identical	hypothetical protein
BruAb1_1074	BAbS19_I10120	identical	nitroreductase family protein
BruAb1_1075	BAbS19_I10130	identical	hypothetical protein
BruAb1_1076	BAbS19_I10140	identical	threonyl-tRNA synthetase
BruAb1_1077	BAbS19_I10150	identical	D-alanyl-D-alanine carboxypeptidase
BruAb1_1078	BAbS19_I10160	identical	hypothetical protein
BruAb1_1079	BAbS19_I10170	identical	NifU-related protein
BruAb1_1080	BAbS19_I10180	identical	GTP cyclohydrolase I
BruAb1_1081	BAbS19_I10190	identical	phosphoribosyl-AMP cyclohydrolase
BruAb1_1082	BAbS19_I10200	identical	hypothetical protein
BruAb1_1083	BAbS19_I10210	identical	site-specific recombinase, phage integrase family
BruAb1_1084	BAbS19_I10220	identical	hypothetical protein
BruAb1_1085	no match	identical	hypothetical protein
BruAb1_1087	BAbS19_I10240	identical	site-specific recombinase, resolvase family
BruAb1_1088	no match	identical	hypothetical protein
BruAb1_1089	BAbS19_I10250	identical	hypothetical BRO family protein
BruAb1_1091	BAbS19_I10280	identical	glutaryl-CoA dehydrogenase
BruAb1_1092	BAbS19_I10290	identical	transcriptional regulator, LysR family
BruAb1_1093	BAbS19_I10300	identical	bacterial luciferase family protein
BruAb1_1094	BAbS19_I10310	identical	AcrB/AcrD/AcrF multidrug efflux protein
BruAb1_1095	BAbS19_I10320	identical	hypothetical protein
BruAb1_1096	BAbS19_I10330	identical	transcriptional regulator, TetR family
BruAb1_1097	BAbS19_I10340	identical	queuine tRNA-ribosyltransferase
BruAb1_1098	BAbS19_I10350	identical	S-adenosylmethionine:tRNA ribosyltransferase-isomerase
BruAb1_1099	BAbS19_I10360	identical	peptidyl-prolyl cis-trans isomerase, cyclophilin-type
BruAb1_1100	BAbS19_I10370	identical	peptidyl-prolyl cis-trans isomerase, cyclophilin-type
BruAb1_1101	BAbS19_I10380	identical	phosphopantetheine adenylyltransferase
BruAb1_1102	BAbS19_I10390	identical	hypothetical protein
BruAb1_1103	BAbS19_I10400	identical	DNA gyrase subunit A
BruAb1_1104	BAbS19_I10410	identical	hypothetical membrane protein
BruAb1_1105	BAbS19_I10420	identical	guanylate kinase, hypothetical
BruAb1_1106	BAbS19_I10430	identical	transcriptional regulator, GntR family
BruAb1_1107	BAbS19_I10440	identical	hypothetical protein
BruAb1_1108	BAbS19_I10450	identical	single-stranded DNA-binding protein family
BruAb1_1109	no match	identical	hypothetical protein
BruAb1_1110	BAbS19_I10460	identical	excinuclease ABC subunit A
BruAb1_1111	BAbS19_I10470	identical	DNA-binding protein HU
BruAb1_1112	BAbS19_I10480	identical	Lon, ATP-dependent protease La
BruAb1_1113	BAbS19_I10490	identical	hypothetical protein
BruAb1_1115	BAbS19_I10510	identical	ATP-dependent Clp protease proteolytic subunit
BruAb1_1116	BAbS19_I10520	identical	GTP-binding protein, hypothetical
BruAb1_1117	BAbS19_I10530	identical	RNA-binding protein Hfq
BruAb1_1118	no match	identical	hypothetical protein
BruAb1_1120	BAbS19_I10550	identical	TrkA, potassium uptake protein TrkA
BruAb1_1121	BAbS19_I10560	identical	NtrX, nitrogen regulation protein NtrX
BruAb1_1122	BAbS19_I10570	identical	NtrY, nitrogen regulation protein NtrY
BruAb1_1123	BAbS19_I10580	identical	NtrC, nitrogen regulation protein NtrC
BruAb1_1124	BAbS19_I10590	identical	NtrB, nitrogen regulation protein NtrB
BruAb1_1125	BAbS19_I10600	identical	NifR3, nitrogen regulation protein Nifr3
BruAb1_1126	BAbS19_I10610	identical	bifunctional 2-C-methyl-D-erythritol 4-phosphate cytidylyltransferase/2-C-methyl-D-erythritol 2,4-cyclodiphosphate synthase protein
BruAb1_1127	BAbS19_I10620	identical	CinA, competence/damage-inducible protein CinA
BruAb1_1129	BAbS19_I10640	identical	hypothetical protein
BruAb1_1130	BAbS19_I10650	identical	lipoyl synthase
BruAb1_1131	BAbS19_I10660	identical	hypothetical protein
BruAb1_1132	BAbS19_I10670	identical	dihydrolipoamide dehydrogenase
BruAb1_1133	BAbS19_I10680	identical	AceF, pyruvate dehydrogenase complex, E2 component, dihydrolipoamide acetyltransferase
BruAb1_1135	BAbS19_I10700	identical	PdhA, pyruvate dehydrogenase complex, E1 component, alpha subunit
BruAb1_1136	BAbS19_I10710	identical	hypothetical protein
BruAb1_1137	BAbS19_I10720	identical	hypothetical protein
BruAb1_1138	BAbS19_I10730	identical	enolase
BruAb1_1139	BAbS19_I10740	identical	2-dehydro-3-deoxyphosphooctonate aldolase
BruAb1_1142	BAbS19_I10760	identical	hypothetical protein
BruAb1_1143	BAbS19_I10770	identical	protein-export membrane protein
BruAb1_1144	BAbS19_I10780	identical	triosephosphate isomerase
BruAb1_1145	BAbS19_I10790	identical	rotamase family protein
BruAb1_1146	BAbS19_I10800	identical	anthranilate phosphoribosyltransferase
BruAb1_1147	BAbS19_I10810	identical	indole-3-glycerol-phosphate synthase
BruAb1_1148	BAbS19_I10820	identical	molybdenum cofactor biosynthesis protein C
BruAb1_1149	BAbS19_I10830	identical	MoeA, molybdopterin biosynthesis protein MoeA
BruAb1_1150	BAbS19_I10840	identical	LexA repressor
BruAb1_1151	BAbS19_I10850	identical	ComEC/Rec2 family protein, hypothetical
BruAb1_1152	BAbS19_I10860	identical	hypothetical protein
BruAb1_1153	BAbS19_I10870	identical	glutamyl-tRNA synthetase
BruAb1_1154	BAbS19_I10880	identical	citrate synthase
BruAb1_1155	BAbS19_I10890	identical	lipid-A-disaccharide synthase
BruAb1_1156	BAbS19_I10900	identical	conserved hypothetical protein TIGR00148
BruAb1_1157	BAbS19_I10910	identical	UDP-N-acetylglucosamine acyltransferase
BruAb1_1158	BAbS19_I10920	identical	(3R)-hydroxymyristoyl ACP dehydratase
BruAb1_1159	BAbS19_I10930	identical	UDP-3-O-[3-hydroxymyristoyl] glucosamine N-acyltransferase
BruAb1_1160	BAbS19_I10940	identical	bacterial surface antigen
BruAb1_1161	no match	identical	hypothetical protein
BruAb1_1162	BAbS19_I10950	identical	hypothetical membrane-associated zinc metalloprotease
BruAb1_1163	BAbS19_I10960	identical	CdsA, phosphatidate cytidylyltransferase
BruAb1_1164	BAbS19_I10970	identical	UppS, undecaprenyl diphosphate synthase
BruAb1_1165	BAbS19_I10980	identical	ribosome releasing factor
BruAb1_1166	BAbS19_I10990	identical	uridylate kinase
BruAb1_1167	BAbS19_I11000	identical	elongation factor Ts
BruAb1_1168	BAbS19_I11010	identical	30S ribosomal protein S2
BruAb1_1169	BAbS19_I11020	identical	hypothetical protein
BruAb1_1170	BAbS19_I11030	identical	hypothetical protein
BruAb1_1171	BAbS19_I11040	identical	hypothetical protein
BruAb1_1173	BAbS19_I11070	identical	hypothetical protein
BruAb1_1174	BAbS19_I11080	identical	HIT family protein
BruAb1_1175	BAbS19_I11090	identical	ClpA, ATP-dependent Clp protease, ATP-binding subunit ClpA
BruAb1_1176	BAbS19_I11100	identical	ATP-dependent Clp protease adaptor protein ClpS
BruAb1_1177	no match	identical	hypothetical protein
BruAb1_1178	BAbS19_I11110	identical	D-alanyl-D-alanine carboxypeptidase
BruAb1_1179	BAbS19_I11120	identical	hypothetical protein
BruAb1_1180	BAbS19_I11130	identical	hypothetical protein
BruAb1_1182	BAbS19_I11150	identical	hypothetical protein
BruAb1_1183	BAbS19_I11160	identical	hypothetical protein
BruAb1_1184	BAbS19_I11170	identical	hypothetical membrane protein
BruAb1_1185	BAbS19_I11180	identical	transcriptional regulator, hypothetical
BruAb1_1186	BAbS19_I11190	identical	hypothetical protein
BruAb1_1188	BAbS19_I11210	identical	hypothetical protein
BruAb1_1189	BAbS19_I11220	identical	hypothetical protein
BruAb1_1190	BAbS19_I11230	identical	hypothetical protein
BruAb1_1192	BAbS19_I11250	identical	transcriptional regulator, Cro/CI family
BruAb1_1193	BAbS19_I11260	identical	propionlyl-CoA carboxylase
BruAb1_1194	BAbS19_I11270	identical	PccA, propionyl-CoA carboxylase, alpha subunit
BruAb1_1195	BAbS19_I11280	identical	methylmalonyl-CoA mutase
BruAb1_1197	BAbS19_I11300	identical	hypothetical membrane protein
BruAb1_1198	BAbS19_I11310	identical	hypothetical protein
BruAb1_1199	BAbS19_I11320	identical	outer membrane protein, hypothetical
BruAb1_1200	BAbS19_I11330	identical	glutamate racemase
BruAb1_1201	BAbS19_I11340	identical	RNA methyltransferase, TrmH family, group 1
BruAb1_1202	BAbS19_I11350	identical	ThiJ/PfpI family protein
BruAb1_1203	BAbS19_I11360	identical	hypothetical protein
BruAb1_1204	BAbS19_I11370	identical	isocitrate dehydrogenase
BruAb1_1205	BAbS19_I11380	identical	PhoA, alkaline phosphatase
BruAb1_1206	BAbS19_I11390	identical	alanyl-tRNA synthetase
BruAb1_1207	BAbS19_I11400	identical	recombinase A
BruAb1_1208	BAbS19_I11410	identical	hypothetical protein
BruAb1_1209	BAbS19_I11420	identical	OmpA family protein
BruAb1_1210	BAbS19_I11430	identical	hypothetical lipoprotein
BruAb1_1211	BAbS19_I11440	identical	ATPase, AAA family
BruAb1_1212	BAbS19_I11450	identical	serine protease
BruAb1_1213	BAbS19_I11460	identical	50S ribosomal protein L17
BruAb1_1214	BAbS19_I11470	identical	DNA-directed RNA polymerase alpha subunit
BruAb1_1215	BAbS19_I11480	identical	30S ribosomal protein S11
BruAb1_1216	BAbS19_I11490	identical	30S ribosomal protein S13
BruAb1_1217	BAbS19_I11500	identical	adenylate kinase
BruAb1_1218	BAbS19_I11510	identical	preprotein translocase SecY
BruAb1_1219	BAbS19_I11520	identical	RplO, ribosomal protein L15
BruAb1_1220	BAbS19_I11530	identical	50S ribosomal protein L30
BruAb1_1221	BAbS19_I11540	identical	30S ribosomal protein S5
BruAb1_1222	BAbS19_I11550	identical	50S ribosomal protein L18
BruAb1_1223	BAbS19_I11560	identical	50S ribosomal protein L6
BruAb1_1224	BAbS19_I11570	identical	30S ribosomal protein S8
BruAb1_1225	BAbS19_I11580	identical	30S ribosomal protein S14
BruAb1_1226	BAbS19_I11590	identical	50S ribosomal protein L5
BruAb1_1227	BAbS19_I11600	identical	50S ribosomal protein L24
BruAb1_1228	BAbS19_I11610	identical	50S ribosomal protein L14
BruAb1_1229	BAbS19_I11620	identical	30S ribosomal protein S17
BruAb1_1230	BAbS19_I11630	identical	RpmC, ribosomal protein L29
BruAb1_1231	BAbS19_I11640	identical	50S ribosomal protein L16
BruAb1_1232	BAbS19_I11650	identical	30S ribosomal protein S3
BruAb1_1233	BAbS19_I11660	identical	50S ribosomal protein L22
BruAb1_1234	BAbS19_I11670	identical	30S ribosomal protein S19
BruAb1_1235	BAbS19_I11680	identical	50S ribosomal protein L2
BruAb1_1236	BAbS19_I11690	identical	50S ribosomal protein L23
BruAb1_1237	BAbS19_I11700	identical	50S ribosomal protein L4
BruAb1_1238	BAbS19_I11710	identical	50S ribosomal protein L3
BruAb1_1239	BAbS19_I11720	identical	30S ribosomal protein S10
BruAb1_1240	BAbS19_I11730	identical	elongation factor Tu
BruAb1_1242	BAbS19_I11750	identical	30S ribosomal protein S7
BruAb1_1243	BAbS19_I11760	identical	30S ribosomal protein S12
BruAb1_1244	no match	identical	hypothetical protein
BruAb1_1245	no match	identical	hypothetical protein
BruAb1_1246	BAbS19_I11770	identical	hypothetical protein
BruAb1_1247	BAbS19_I11780	identical	DNA-directed RNA polymerase beta' subunit
BruAb1_1248	BAbS19_I11790	identical	DNA-directed RNA polymerase beta subunit
BruAb1_1249	BAbS19_I11800	identical	50S ribosomal protein L7/L12
BruAb1_1251	BAbS19_I11820	identical	50S ribosomal protein L1
BruAb1_1252	BAbS19_I11830	identical	50S ribosomal protein L11
BruAb1_1253	BAbS19_I11840	identical	transcription antitermination protein NusG
BruAb1_1254	BAbS19_I11850	identical	translocase
BruAb1_1255	BAbS19_I11860	identical	elongation factor Tu
BruAb1_1256	no match	identical	hypothetical protein
BruAb1_1257	BAbS19_I11870	identical	RNA methyltransferase, TrmH family, group 3
BruAb1_1258	BAbS19_I11880	identical	CBS domain protein
BruAb1_1259	BAbS19_I11890	identical	rhomboid family protein
BruAb1_1260	no match	identical	hypothetical protein
BruAb1_1261	BAbS19_I11900	identical	hypothetical protein
BruAb1_1262	BAbS19_I11910	identical	hypothetical protein
BruAb1_1263	BAbS19_I11920	identical	ferripyochelin-binding protein, hypothetical
BruAb1_1264	BAbS19_I11930	identical	hypothetical protein
BruAb1_1265	BAbS19_I11940	identical	CysE, serine acetyltransferase
BruAb1_1266	BAbS19_I11960	identical	hydrolase, alpha/beta hydrolase fold family
BruAb1_1267	BAbS19_I11970	identical	hypothetical protein
BruAb1_1268	BAbS19_I11980	identical	cold-shock family protein
BruAb1_1269	BAbS19_I11990	identical	hypothetical protein
BruAb1_1270	BAbS19_I12000	identical	GloA, lactoylglutathione lyase
BruAb1_1272	BAbS19_I12030	identical	RecJ, single-stranded-DNA-specific exonuclease RecJ
BruAb1_1273	BAbS19_I12040	identical	DdlA, D-alanine--D-alanine ligase A
BruAb1_1274	BAbS19_I12060	identical	GlpX protein
BruAb1_1275	BAbS19_I12070	identical	homoserine dehydrogenase
BruAb1_1276	BAbS19_I12080	identical	hypothetical protein
BruAb1_1277	BAbS19_I12090	identical	hypothetical protein
BruAb1_1278	BAbS19_I12100	identical	hypothetical protein
BruAb1_1279	BAbS19_I12110	identical	hypothetical protein
BruAb1_1280	no match	identical	hypothetical protein
BruAb1_1281	no match	identical	hypothetical protein
BruAb1_1282	BAbS19_I12120	identical	sugar fermentation stimulation protein
BruAb1_1283	BAbS19_I12130	identical	methionine aminopeptidase
BruAb1_1284	BAbS19_I12140	identical	DNA repair protein RadC
BruAb1_1285	BAbS19_I12150	identical	hypothetical membrane protein
BruAb1_1286	BAbS19_I12160	identical	CobL, precorrin-6Y C5,15-methyltransferase
BruAb1_1287	BAbS19_I12170	identical	nitrite reductase family protein
BruAb1_1288	BAbS19_I12180	identical	precorrin-8X methylmutase
BruAb1_1290	BAbS19_I12200	identical	CbiG, precorrin-3B C17-methyltransferase
BruAb1_1291	BAbS19_I12210	identical	hypothetical protein
BruAb1_1294	BAbS19_I12260	identical	branched-chain amino acid ABC transporter, periplasmic amino acid-binding protein, hypothetical
BruAb1_1295	BAbS19_I12270	identical	CobD, cobalamin biosynthesis protein
BruAb1_1296	BAbS19_I12280	identical	CobC, cobC protein
BruAb1_1297	BAbS19_I12290	identical	cobyrinic acid a,c-diamide synthase
BruAb1_1298	BAbS19_I12300	identical	CobA, uroporphyrin-III C-methyltransferase
BruAb1_1299	BAbS19_I12310	identical	cobalt-precorrin-6A synthase
BruAb1_1300	BAbS19_I12320	identical	precorrin-6x reductase
BruAb1_1301	BAbS19_I12330	identical	CobM, precorrin-4 C11-methyltransferase
BruAb1_1302	BAbS19_I12340	identical	hypothetical precorrin-3B C17-methyltransferase
BruAb1_1303	BAbS19_I12350	identical	hypothetical protein
BruAb1_1304	BAbS19_I12360	identical	hypothetical protein
BruAb1_1305	BAbS19_I12370	identical	hypothetical membrane protein
BruAb1_1306	BAbS19_I12380	identical	cob(I)yrinic acid a,c-diamide adenosyltransferase
BruAb1_1308	BAbS19_I12400	identical	hypothetical CobW
BruAb1_1309	BAbS19_I12410	identical	adenosylcobinamide kinase
BruAb1_1310	BAbS19_I12420	identical	hypothetical protein
BruAb1_1311	BAbS19_I12430	identical	hypothetical protein
BruAb1_1312	BAbS19_I12440	identical	cobyric acid synthase
BruAb1_1313	no match	identical	hypothetical protein
BruAb1_1314	BAbS19_I12450	identical	acyl-CoA dehydrogenase
BruAb1_1315	BAbS19_I12460	identical	MmsB, 3-hydroxyisobutyrate dehydrogenase
BruAb1_1316	BAbS19_I12470	identical	hypothetical protein
BruAb1_1318	BAbS19_I12480	identical	transcriptional regulatory protein, LysR family
BruAb1_1319	BAbS19_I12490	identical	transcriptional regulator, AraC family
BruAb1_1322	BAbS19_I12530	identical	membrane protein
BruAb1_1324	BAbS19_I12550	identical	protein-export membrane protein, SecD/SecF family
BruAb1_1325	BAbS19_I12560	identical	potassium efflux system family protein
BruAb1_1326	BAbS19_I12570	identical	hypothetical membrane protein
BruAb1_1328	BAbS19_I12600	identical	CysW-2, sulfate ABC transporter, permease protein
BruAb1_1329	BAbS19_I12610	identical	permease
BruAb1_1330	BAbS19_I12620	identical	hypothetical sulfate ABC transporter, sulfate-binding protein
BruAb1_1331	BAbS19_I12630	identical	hypothetical protein
BruAb1_1332	BAbS19_I12640	identical	CBS domain protein
BruAb1_1334	BAbS19_I12660	identical	hypothetical acid-shock protein
BruAb1_1335	BAbS19_I12670	identical	FucU, fucose operon fucU protein
BruAb1_1336	BAbS19_I12680	identical	short chain dehydrogenase
BruAb1_1337	BAbS19_I12690	identical	sugar ABC transporter, ATP-binding protein
BruAb1_1339	no match	identical	hypothetical protein
BruAb1_1340	BAbS19_I12720	identical	sugar ABC transporter, periplasmic sugar-binding protein
BruAb1_1341	BAbS19_I12730	identical	hypothetical oxidoreductase
BruAb1_1342	BAbS19_I12740	identical	iron compound ABC transporter, ATP-binding protein
BruAb1_1343	BAbS19_I12750	identical	iron compound ABC transporter, permease protein
BruAb1_1344	BAbS19_I12760	identical	iron compound ABC transporter, periplasmic iron compound-binding protein
BruAb1_1345	BAbS19_I12770	identical	hypothetical iron compound TonB-dependent receptor
BruAb1_1346	no match	identical	hypothetical protein
BruAb1_1349	BAbS19_I12810	identical	HlyD family secretion protein
BruAb1_1352	no match	identical	hypothetical protein
BruAb1_1353	BAbS19_I12840	identical	UreA-2, urease, gamma subunit
BruAb1_1354	BAbS19_I12850	identical	UreB-2, urease, beta subunit
BruAb1_1355	BAbS19_I12860	identical	UreC-2, urease, alpha subunit
BruAb1_1356	BAbS19_I12870	identical	urease accessory protein UreE, hypothetical
BruAb1_1357	BAbS19_I12880	identical	hypothetical urease accessory protein UreF
BruAb1_1358	BAbS19_I12890	identical	UreG-2, urease accessory protein UreG
BruAb1_1359	BAbS19_I12900	identical	UreD-2, urease accessory protein
BruAb1_1360	BAbS19_I12910	identical	hypothetical urea transporter
BruAb1_1361	BAbS19_I12920	identical	hypothetical lipoprotein
BruAb1_1362	BAbS19_I12930	identical	CbiM, cobalamin biosynthetesis protein
BruAb1_1363	BAbS19_I12940	identical	hypothetical protein
BruAb1_1364	BAbS19_I12950	identical	cobalt ABC transporter, permease protein
BruAb1_1365	BAbS19_I12960	identical	cobalt ABC transporter, ATP-binding protein
BruAb1_1366	BAbS19_I12970	identical	CrcB family protein
BruAb1_1367	BAbS19_I12980	identical	camphor resistance protein CrcB
BruAb1_1369	BAbS19_I13000	identical	hypothetical protein
BruAb1_1370	BAbS19_I13020	identical	phenazine biosynthesis protein, PhzF family
BruAb1_1372	BAbS19_I13040	identical	hypothetical protein
BruAb1_1373	BAbS19_I13050	identical	hypothetical protein
BruAb1_1374	BAbS19_I13060	identical	aminotransferase, class I
BruAb1_1375	no match	identical	hypothetical protein
BruAb1_1376	BAbS19_I13070	identical	ketol-acid reductoisomerase
BruAb1_1377	BAbS19_I13080	identical	transcriptional regulator, TetR family
BruAb1_1378	BAbS19_I13090	identical	hypothetical protein
BruAb1_1379	BAbS19_I13100	identical	potassium uptake protein
BruAb1_1380	BAbS19_I13110	identical	hypothetical protein
BruAb1_1381	BAbS19_I13120	identical	pyridoxal phosphate biosynthetic protein
BruAb1_1382	BAbS19_I13130	identical	hypothetical protein
BruAb1_1383	BAbS19_I13140	identical	hypothetical protein
BruAb1_1384	BAbS19_I13150	identical	acetolactate synthase small subunit
BruAb1_1385	BAbS19_I13160	identical	acetolactate synthase III large subunit
BruAb1_1386	BAbS19_I13170	identical	tRNA delta(2)-isopentenylpyrophosphate transferase
BruAb1_1387	BAbS19_I13180	identical	SerB, phosphoserine phosphatase
BruAb1_1388	BAbS19_I13190	identical	hypothetical protein
BruAb1_1389	BAbS19_I13200	identical	serine protease Do, hypothetical
BruAb1_1390	BAbS19_I13210	identical	hypothetical protein
BruAb1_1391	BAbS19_I13220	identical	HflC, hflC protein
BruAb1_1392	BAbS19_I13230	identical	HflK, hflK protein
BruAb1_1393	BAbS19_I13240	identical	FolA, dihydrofolate reductase
BruAb1_1394	BAbS19_I13250	identical	thymidylate synthase
BruAb1_1395	BAbS19_I13260	identical	hypothetical protein
BruAb1_1397	BAbS19_I13280	identical	hypothetical protein
BruAb1_1398	BAbS19_I13290	identical	transcriptional regulator, TetR family
BruAb1_1399	BAbS19_I13300	identical	hypothetical protein
BruAb1_1400	BAbS19_I13310	identical	hypothetical protein
BruAb1_1401	BAbS19_I13320	identical	hypothetical protein
BruAb1_1402	BAbS19_I13330	identical	hypothetical protein
BruAb1_1403	BAbS19_I13340	identical	hypothetical protein
BruAb1_1404	BAbS19_I13350	identical	hypothetical protein
BruAb1_1405	BAbS19_I13360	identical	oxidoreductase
BruAb1_1406	BAbS19_I13370	identical	hypothetical protein
BruAb1_1407	BAbS19_I13380	identical	serine/threonine protein kinase
BruAb1_1408	BAbS19_I13390	identical	DNA helicase II
BruAb1_1409	BAbS19_I13400	identical	hypothetical protein
BruAb1_1410	BAbS19_I13410	identical	antibiotic acetyltransferase
BruAb1_1411	BAbS19_I13420	identical	SCO1/SenC family protein
BruAb1_1412	BAbS19_I13430	identical	ribosomal protein L11 methyltransferase
BruAb1_1413	BAbS19_I13440	identical	aminopeptidase P
BruAb1_1414	BAbS19_I13450	identical	hypothetical protein
BruAb1_1415	BAbS19_I13460	identical	DNA ligase
BruAb1_1416	BAbS19_I13470	identical	RecN, DNA repair protein
BruAb1_1417	BAbS19_I13480	identical	ComL, hypothetical competence protein
BruAb1_1418	no match	identical	hypothetical protein
BruAb1_1419	BAbS19_I13490	identical	UDP-3-O-[3-hydroxymyristoyl] N-acetylglucosamine deacetylase
BruAb1_1420	BAbS19_I13500	identical	cell division protein FtsZ
BruAb1_1422	BAbS19_I13520	identical	hypothetical cell division protein FtsQ
BruAb1_1423	BAbS19_I13530	identical	D-alanylalanine synthetase
BruAb1_1424	BAbS19_I13540	identical	UDP-N-acetylenolpyruvoylglucosamine reductase
BruAb1_1425	BAbS19_I13550	identical	UDP-N-acetylmuramate--L-alanine ligase
BruAb1_1426	BAbS19_I13560	identical	N-acetylglucosaminyl transferase
BruAb1_1427	BAbS19_I13570	identical	FtsW, cell division protein
BruAb1_1428	BAbS19_I13580	identical	UDP-N-acetylmuramoyl-L-alanyl-D-glutamate synthetase
BruAb1_1429	BAbS19_I13590	identical	phospho-N-acetylmuramoyl-pentapeptide-transferase
BruAb1_1430	BAbS19_I13600	identical	MurF, UDP-N-acetylmuramoylalanyl-D-glutamyl-2,6-diaminopimelate--D-alanyl-D-alanyl ligase
BruAb1_1431	BAbS19_I13610	identical	UDP-N-acetylmuramoylalanyl-D-glutamate--2,6-diaminopimelate ligase
BruAb1_1432	BAbS19_I13620	identical	penicillin-binding protein
BruAb1_1433	BAbS19_I13630	identical	hypothetical protein
BruAb1_1434	BAbS19_I13640	identical	S-adenosyl-methyltransferase
BruAb1_1435	no match	identical	hypothetical protein
BruAb1_1436	BAbS19_I13650	identical	putative manganese transport protein MntH
BruAb1_1437	no match	identical	hypothetical protein
BruAb1_1438	BAbS19_I13660	identical	transglycosylase SLT domain protein
BruAb1_1439	BAbS19_I13670	identical	N-acetylmuramoyl-L-alanine amidase, family 2
BruAb1_1440	BAbS19_I13680	identical	DnaJ domain protein
BruAb1_1441	BAbS19_I13690	identical	hypothetical protein
BruAb1_1443	BAbS19_I13710	identical	hypothetical transglycolase
BruAb1_1444	BAbS19_I13720	identical	hypothetical transporter
BruAb1_1445	BAbS19_I13730	identical	MetF, 5,10-methylenetetrahydrofolate reductase
BruAb1_1446	BAbS19_I13740	identical	transcriptional regulator, ArsR family
BruAb1_1447	BAbS19_I13750	identical	hypothetical protein
BruAb1_1448	BAbS19_I13760	identical	metabolite-proton symporter
BruAb1_1449	no match	identical	hypothetical protein
BruAb1_1451	BAbS19_I13780	identical	ABC transporter, ATP-binding protein
BruAb1_1452	BAbS19_I13790	identical	hypothetical protein
BruAb1_1453	BAbS19_I13800	identical	hypothetical protein
BruAb1_1456	BAbS19_I13840	identical	Rieske 2Fe-2S family protein
BruAb1_1457	BAbS19_I13850	identical	NADH oxidoreductase, hypothetical
BruAb1_1458	BAbS19_I13860	identical	PhnA protein
BruAb1_1459	BAbS19_I13870	identical	PncA, pyrazinamidase/nicotinamidase
BruAb1_1460	BAbS19_I13880	identical	hypothetical protein
BruAb1_1461	BAbS19_I13890	identical	hypothetical protein
BruAb1_1462	no match	identical	hypothetical protein
BruAb1_1463	BAbS19_I13900	identical	choloylglycine hydrolase family protein
BruAb1_1464	BAbS19_I13910	identical	hypothetical protein
BruAb1_1465	no match	identical	hypothetical protein
BruAb1_1466	no match	identical	hypothetical protein
BruAb1_1467	BAbS19_I13920	identical	hypothetical protein
BruAb1_1468	BAbS19_I13930	identical	hypothetical protein
BruAb1_1469	BAbS19_I13940	identical	site-specific recombinase, phage integrase family
BruAb1_1471	BAbS19_I13960	identical	hypothetical protein
BruAb1_1472	BAbS19_I13970	identical	hypothetical protein
BruAb1_1473	BAbS19_I13980	identical	hypothetical protein
BruAb1_1475	BAbS19_I14000	identical	DNA primase
BruAb1_1476	BAbS19_I14010	identical	Na/Pi-cotransporter family protein
BruAb1_1477	BAbS19_I14020	identical	hypothetical protein
BruAb1_1478	BAbS19_I14030	identical	carbamoyl-phosphate synthase small subunit
BruAb1_1480	BAbS19_I14050	identical	hypothetical membrane protein
BruAb1_1481	BAbS19_I14060	identical	hypothetical protein
BruAb1_1482	BAbS19_I14070	identical	carbamoyl-phosphate synthase large subunit
BruAb1_1483	no match	identical	hypothetical protein
BruAb1_1484	BAbS19_I14080	identical	hypothetical transporter
BruAb1_1485	BAbS19_I14090	identical	MutT/nudix family protein
BruAb1_1486	BAbS19_I14100	identical	cold-shock family protein
BruAb1_1487	BAbS19_I14110	identical	glutathione S-transferase family protein
BruAb1_1488	BAbS19_I14120	identical	aspartate aminotransferase
BruAb1_1489	no match	identical	hypothetical protein
BruAb1_1490	BAbS19_I14130	identical	hypothetical protein
BruAb1_1491	BAbS19_I14140	identical	transcriptional regulator, LysR family
BruAb1_1492	BAbS19_I14150	identical	TrxB, thioredoxin reductase
BruAb1_1493	BAbS19_I14160	identical	cation transport protein
BruAb1_1494	no match	identical	hypothetical protein
BruAb1_1495	BAbS19_I14170	identical	Lrp-1, leucine-responsive regulatory protein
BruAb1_1496	BAbS19_I14180	identical	LpcC, lipopolysaccharide core biosynthesis mannosyltransferase
BruAb1_1497	BAbS19_I14190	identical	transcription elongation factor GreA
BruAb1_1498	BAbS19_I14200	identical	hypothetical protein
BruAb1_1499	BAbS19_I14220	identical	hypothetical membrane protein
BruAb1_1500	BAbS19_I14230	identical	hypothetical membrane protein
BruAb1_1501	BAbS19_I14240	identical	hypothetical protein
BruAb1_1502	BAbS19_I14250	identical	long-chain acyl-CoA thioester hydrolase, hypothetical
BruAb1_1503	BAbS19_I14260	identical	hypothetical protein
BruAb1_1505	BAbS19_I14280	identical	transglycosylase, degenerate
BruAb1_1506	BAbS19_I14290	identical	cold-shock family protein
BruAb1_1507	BAbS19_I14310	identical	hypothetical protein
BruAb1_1508	BAbS19_I14320	identical	metallo-beta-lactamase family protein
BruAb1_1509	BAbS19_I14330	identical	hypothetical protein
BruAb1_1510	BAbS19_I14340	identical	hypothetical protein
BruAb1_1511	BAbS19_I14350	identical	transcriptional regulator, MarR family
BruAb1_1512	BAbS19_I14360	identical	hypothetical transcriptional regulatory protein OmpR
BruAb1_1513	BAbS19_I14370	identical	EnvZ
BruAb1_1514	BAbS19_I14390	identical	CsaA, csaA protein
BruAb1_1515	BAbS19_I14400	identical	hypothetical protein
BruAb1_1516	BAbS19_I14410	identical	hypothetical protein
BruAb1_1517	BAbS19_I14430	identical	prolipoprotein diacylglyceryl transferase
BruAb1_1518	BAbS19_I14440	identical	hypothetical protein
BruAb1_1519	BAbS19_I14450	identical	conserved hypothetical protein TIGR00726
BruAb1_1520	BAbS19_I14460	identical	peptidase, M24 family
BruAb1_1521	BAbS19_I14470	identical	lipoprotein, hypothetical
BruAb1_1522	BAbS19_I14480	identical	ribose-phosphate pyrophosphokinase
BruAb1_1523	BAbS19_I14490	identical	hypothetical protein
BruAb1_1524	BAbS19_I14500	identical	50S ribosomal protein L25
BruAb1_1525	BAbS19_I14510	identical	peptidyl-tRNA hydrolase
BruAb1_1526	BAbS19_I14520	identical	GTP-binding protein, hypothetical
BruAb1_1528	BAbS19_I14540	identical	maoC-related protein
BruAb1_1529	BAbS19_I14550	identical	adenine phosphoribosyltransferase
BruAb1_1530	BAbS19_I14560	identical	ubiquinol-cytochrome c reductase, cytochrome c1, hypothetical
BruAb1_1531	BAbS19_I14570	identical	PetB, ubiquinol-cytochrome c reductase, cytochrome b
BruAb1_1532	BAbS19_I14580	identical	ubiquinol-cytochrome c reductase, iron-sulfur subunit
BruAb1_1533	BAbS19_I14590	identical	hypothetical ABC transporter, ATP-binding/permease
BruAb1_1534	BAbS19_I14600	identical	ABC transporter, ATP-binding protein
BruAb1_1535	BAbS19_I14610	identical	RNA methyltransferase, TrmH family
BruAb1_1536	BAbS19_I14620	identical	purine nucleoside permease
BruAb1_1537	no match	identical	hypothetical protein
BruAb1_1538	BAbS19_I14630	identical	hypothetical protein
BruAb1_1539	BAbS19_I14640	identical	coproporphyrinogen III oxidase
BruAb1_1540	BAbS19_I14650	identical	acetyltransferase, GNAT family
BruAb1_1542	BAbS19_I14680	identical	polyA polymerase family protein
BruAb1_1543	BAbS19_I14690	identical	MutT/nudix family protein
BruAb1_1544	BAbS19_I14700	identical	hypothetical protein
BruAb1_1546	BAbS19_I14720	identical	hypothetical protein
BruAb1_1547	BAbS19_I14730	identical	hypothetical membrane protein
BruAb1_1548	BAbS19_I14740	identical	hypothetical protein
BruAb1_1549	BAbS19_I14750	identical	acetyltransferase, GNAT family
BruAb1_1550	BAbS19_I14760	identical	glutathione S-transferase domain protein
BruAb1_1552	BAbS19_I14780	identical	MutT/nudix family protein
BruAb1_1553	BAbS19_I14790	identical	hypothetical protein
BruAb1_1554	no match	identical	hypothetical protein
BruAb1_1555	BAbS19_I14800	identical	2-isopropylmalate synthase
BruAb1_1556	no match	identical	hypothetical protein
BruAb1_1557	BAbS19_I14810	identical	cation efflux family protein
BruAb1_1559	BAbS19_I14850	identical	Lrp-2, leucine-responsive regulatory protein
BruAb1_1561	BAbS19_I14870	identical	hypothetical transporter
BruAb1_1562	BAbS19_I14880	identical	hypothetical protein
BruAb1_1563	BAbS19_I14890	identical	hypothetical protein
BruAb1_1564	BAbS19_I14900	identical	hypothetical protein
BruAb1_1565	no match	identical	hypothetical protein
BruAb1_1566	BAbS19_I14910	identical	hypothetical glycine betaine/L-proline ABC transporter, periplasmic glycine betaine-binding protein
BruAb1_1567	BAbS19_I14920	identical	hypothetical glycine betaine/L-proline ABC transporter, permease protein
BruAb1_1568	BAbS19_I14930	identical	glycine betaine/L-proline ABC transporter
BruAb1_1569	BAbS19_I14940	identical	dipeptide ABC transporter, ATP-binding protein, hypothetical
BruAb1_1570	BAbS19_I14950	identical	hypothetical dipeptide ABC transporter, ATP-binding protein
BruAb1_1571	BAbS19_I14960	identical	dipeptide ABC transporter, permease protein
BruAb1_1572	BAbS19_I14970	identical	dipeptide ABC transporter, permease protein
BruAb1_1574	no match	identical	hypothetical protein
BruAb1_1575	no match	identical	hypothetical protein
BruAb1_1576	BAbS19_I15010	identical	transcriptional regulator, ArsR family
BruAb1_1577	BAbS19_I15020	identical	RNA methyltransferase, TrmH family
BruAb1_1578	BAbS19_I15030	identical	tRNA (5-methylaminomethyl-2-thiouridylate)-methyltransferase
BruAb1_1579	BAbS19_I15040	identical	hypothetical protein
BruAb1_1580	BAbS19_I15050	identical	hypothetical protein
BruAb1_1581	BAbS19_I15060	identical	hypothetical protein
BruAb1_1582	BAbS19_I15070	identical	hypothetical protein
BruAb1_1583	BAbS19_I15080	identical	hypothetical protein
BruAb1_1584	no match	identical	hypothetical protein
BruAb1_1585	BAbS19_I15090	identical	hypothetical protein
BruAb1_1586	BAbS19_I15100	identical	CtrA, cell cycle transcriptional regulator CtrA
BruAb1_1587	BAbS19_I15110	identical	hypothetical protein
BruAb1_1588	BAbS19_I15120	identical	DegT/DnrJ/EryC1/StrS family protein
BruAb1_1590	no match	identical	hypothetical protein
BruAb1_1591	no match	identical	hypothetical protein
BruAb1_1592	BAbS19_I15140	identical	glycosyl transferase, family 25
BruAb1_1593	BAbS19_I15150	identical	sensory box histidine kinase
BruAb1_1594	no match	identical	hypothetical protein
BruAb1_1595	BAbS19_I15160	identical	AsmA family protein
BruAb1_1599	BAbS19_I15210	identical	hypothetical spermidine/putrescine ABC transporter, periplasmic spermidine/putrescine-binding protein
BruAb1_1601	BAbS19_I15240	identical	isocitrate lyase
BruAb1_1602	BAbS19_I15250	identical	hypothetical protein
BruAb1_1603	BAbS19_I15260	identical	hypothetical protein
BruAb1_1604	BAbS19_I15270	identical	7-alpha-hydroxysteroid dehydrogenase
BruAb1_1605	BAbS19_I15280	identical	hypothetical 7-alpha-hydroxysteroid dehydrogenase
BruAb1_1607	BAbS19_I15310	identical	hypothetical protein
BruAb1_1608	BAbS19_I15320	identical	Omp31-1, outer membrane protein, 31 kDa
BruAb1_1610	no match	identical	hypothetical protein
BruAb1_1611	BAbS19_I15340	identical	hypothetical protein
BruAb1_1612	BAbS19_I15350	identical	hypothetical protein
BruAb1_1613	BAbS19_I15360	identical	dihydroxyacetone kinase family
BruAb1_1615	BAbS19_I15390	identical	hypothetical protein
BruAb1_1617	BAbS19_I15410	identical	short chain dehydrogenase
BruAb1_1618	BAbS19_I15420	identical	sugar-binding transcriptional regulator, LacI family
BruAb1_1619	BAbS19_I15430	identical	RbsC-2, ribose ABC transporter, permease protein
BruAb1_1620	BAbS19_I15440	identical	RbsA-2, ribose ABC transporter, ATP-binding protein
BruAb1_1621	no match	identical	hypothetical protein
BruAb1_1623	BAbS19_I15460	identical	hypothetical protein
BruAb1_1624	BAbS19_I15470	identical	oxidoreductase, GMC family
BruAb1_1625	BAbS19_I15480	identical	hypothetical protein
BruAb1_1626	no match	identical	hypothetical protein
BruAb1_1627	BAbS19_I15490	identical	transcriptional regulator, IclR family
BruAb1_1628	BAbS19_I15500	identical	GabD, succinate-semialdehyde dehydrogenase
BruAb1_1629	BAbS19_I15510	identical	hypothetical membrane protein
BruAb1_1630	BAbS19_I15520	identical	hypothetical disulfide bond formation protein B
BruAb1_1631	BAbS19_I15530	identical	HNH endonuclease family protein
BruAb1_1632	no match	identical	hypothetical protein
BruAb1_1633	no match	identical	hypothetical protein
BruAb1_1634	BAbS19_I15540	identical	base-excision DNA repair protein
BruAb1_1635	BAbS19_I15550	identical	glutamyl-tRNA synthetase
BruAb1_1636	BAbS19_I15560	identical	malate synthase
BruAb1_1637	BAbS19_I15570	identical	acetyltransferase, GNAT family
BruAb1_1638	BAbS19_I15580	identical	RNA polymerase sigma factor
BruAb1_1639	BAbS19_I15590	identical	ribosomal large subunit pseudouridine synthase, RluD subfamily
BruAb1_1640	BAbS19_I15600	identical	hypothetical protein
BruAb1_1641	BAbS19_I15610	identical	hypothetical ferric uptake regulation protein
BruAb1_1642	BAbS19_I15620	identical	sensor histidine kinase, hypothetical
BruAb1_1643	BAbS19_I15630	identical	hypothetical protein
BruAb1_1644	BAbS19_I15640	identical	two-component response regulator
BruAb1_1645	BAbS19_I15650	identical	RNA polymerase sigma-70 factor
BruAb1_1646	BAbS19_I15660	identical	sensor histidine kinase
BruAb1_1647	BAbS19_I15670	identical	hypothetical protein
BruAb1_1648	BAbS19_I15680	identical	hypothetical protein
BruAb1_1649	BAbS19_I15690	identical	hypothetical protein
BruAb1_1650	no match	identical	hypothetical protein
BruAb1_1651	BAbS19_I15700	identical	hypothetical protein
BruAb1_1652	no match	identical	hypothetical protein
BruAb1_1653	BAbS19_I15710	identical	ExbB, biopolymer transport protein ExbB
BruAb1_1654	BAbS19_I15720	identical	TonB system transport protein ExbD
BruAb1_1655	BAbS19_I15730	identical	TonB-dependent receptor
BruAb1_1656	BAbS19_I15740	identical	hypothetical protein
BruAb1_1659	no match	identical	hypothetical protein
BruAb1_1660	BAbS19_I15780	identical	deoxyuridine 5'-triphosphate nucleotidohydrolase
BruAb1_1661	BAbS19_I15790	identical	transcriptional regulator, AsnC family
BruAb1_1662	BAbS19_I15800	identical	hypothetical protein
BruAb1_1663	BAbS19_I15810	identical	glutamine amidotransferase, hypothetical
BruAb1_1664	BAbS19_I15820	identical	hypothetical membrane protein
BruAb1_1665	BAbS19_I15830	identical	major facilitator family transporter
BruAb1_1666	BAbS19_I15840	identical	hypothetical protein
BruAb1_1667	BAbS19_I15850	identical	hypothetical protein
BruAb1_1668	BAbS19_I15860	identical	adenylosuccinate synthetase
BruAb1_1670	BAbS19_I15880	identical	SerA-1, D-3-phosphoglycerate dehydrogenase
BruAb1_1672	BAbS19_I15890	identical	phosphoserine aminotransferase
BruAb1_1673	BAbS19_I15900	identical	sodium/bile acid transporter family protein
BruAb1_1674	BAbS19_I15910	identical	outer surface protein
BruAb1_1675	BAbS19_I15920	identical	GlmM, phosphoglucosamine mutase
BruAb1_1676	BAbS19_I15930	identical	FtsH, cell division protein FtsH
BruAb1_1677	BAbS19_I15940	identical	hypothetical protein
BruAb1_1678	BAbS19_I15950	identical	hypothetical protein
BruAb1_1679	no match	identical	hypothetical protein
BruAb1_1680	BAbS19_I15960	identical	lipoprotein, Pal family
BruAb1_1681	no match	identical	hypothetical protein
BruAb1_1682	BAbS19_I15970	identical	translocation protein TolB precursor
BruAb1_1683	BAbS19_I15980	identical	TolA, tolA protein
BruAb1_1684	BAbS19_I15990	identical	TonB system transport protein, ExbD/TolR family
BruAb1_1685	BAbS19_I16000	identical	TolQ, tolQ protein
BruAb1_1686	BAbS19_I16010	identical	hypothetical protein
BruAb1_1687	BAbS19_I16020	identical	Holliday junction DNA helicase RuvB
BruAb1_1688	BAbS19_I16030	identical	Holliday junction DNA helicase motor protein
BruAb1_1689	BAbS19_I16040	identical	Holliday junction resolvase
BruAb1_1690	BAbS19_I16050	identical	hypothetical protein
BruAb1_1691	BAbS19_I16060	identical	hypothetical OpgC protein
BruAb1_1692	BAbS19_I16070	identical	thiamine-phosphate pyrophosphorylase
BruAb1_1693	BAbS19_I16080	identical	hypothetical protein
BruAb1_1694	no match	identical	hypothetical protein
BruAb1_1695	BAbS19_I16090	identical	elongation factor P
BruAb1_1696	BAbS19_I16100	identical	inositol monophosphatase family protein
BruAb1_1697	BAbS19_I16110	identical	hypothetical protein
BruAb1_1698	BAbS19_I16120	identical	hypothetical protein
BruAb1_1699	BAbS19_I16130	identical	flagellar motor protein
BruAb1_1700	BAbS19_I16140	identical	ABC transporter, ATP binding/permease protein
BruAb1_1701	BAbS19_I16150	identical	50S ribosomal protein L31
BruAb1_1702	BAbS19_I16160	identical	hypothetical protein
BruAb1_1703	BAbS19_I16170	identical	transcriptional regulator, GntR family
BruAb1_1704	BAbS19_I16180	identical	BioY family protein
BruAb1_1705	BAbS19_I16190	identical	hypothetical protein
BruAb1_1706	BAbS19_I16200	identical	hypothetical protein
BruAb1_1707	BAbS19_I16210	identical	conserved hypothetical protein TIGR00282
BruAb1_1708	BAbS19_I16220	identical	5-formyltetrahydrofolate cyclo-ligase family protein
BruAb1_1709	BAbS19_I16230	identical	hypothetical protein
BruAb1_1710	BAbS19_I16240	identical	hypothetical protein
BruAb1_1711	no match	identical	hypothetical protein
BruAb1_1712	BAbS19_I16250	identical	transketolase
BruAb1_1713	BAbS19_I16260	identical	glyceraldehyde-3-phosphate dehydrogenase
BruAb1_1714	BAbS19_I16270	identical	phosphoglycerate kinase
BruAb1_1715	BAbS19_I16280	identical	hypothetical protein
BruAb1_1717	BAbS19_I16300	identical	hypothetical protein
BruAb1_1718	BAbS19_I16310	identical	hypothetical protein
BruAb1_1720	BAbS19_I16330	identical	hypothetical protein
BruAb1_1721	BAbS19_I16340	identical	hypothetical protein
BruAb1_1722	BAbS19_I16350	identical	hypothetical protein
BruAb1_1723	BAbS19_I16360	identical	alcohol dehydrogenase, zinc-containing
BruAb1_1724	BAbS19_I16370	identical	hypothetical protein
BruAb1_1726	BAbS19_I16400	identical	hypothetical protein
BruAb1_1727	no match	identical	hypothetical protein
BruAb1_1728	BAbS19_I16410	identical	hypothetical protein
BruAb1_1729	BAbS19_I16420	identical	PurE, phosphoribosylaminoimidazole carboxylase, catalytic subunit
BruAb1_1730	BAbS19_I16430	identical	phosphoribosylaminoimidazole carboxylase
BruAb1_1731	BAbS19_I16440	identical	RpmJ, ribosomal protein L36
BruAb1_1732	BAbS19_I16450	identical	TPR domain protein
BruAb1_1733	BAbS19_I16460	identical	pyruvate kinase
BruAb1_1734	BAbS19_I16470	identical	hypothetical protein
BruAb1_1736	no match	identical	hypothetical protein
BruAb1_1737	BAbS19_I16490	identical	hypothetical protein
BruAb1_1738	BAbS19_I16500	identical	ABC transporter, ATP-binding protein
BruAb1_1739	no match	identical	hypothetical protein
BruAb1_1740	BAbS19_I16510	identical	lipoprotein, hypothetical
BruAb1_1741	BAbS19_I16520	identical	hypothetical protein
BruAb1_1742	BAbS19_I16530	identical	ThiB, thiamine-binding periplasmic binding protein
BruAb1_1743	BAbS19_I16540	identical	thiamin ABC transporter membrane component
BruAb1_1744	BAbS19_I16550	identical	hypothetical thiamine ABC transporter, ATP-binding protein
BruAb1_1745	no match	identical	hypothetical protein
BruAb1_1746	BAbS19_I16560	identical	hypothetical peptidase
BruAb1_1747	BAbS19_I16570	identical	MOSC domain protein
BruAb1_1748	BAbS19_I16580	identical	RNA polymerase sigma factor
BruAb1_1749	BAbS19_I16590	identical	hypothetical protein
BruAb1_1750	BAbS19_I16600	identical	hypothetical transcriptional regulator
BruAb1_1751	BAbS19_I16610	identical	FdxA, ferredoxin A
BruAb1_1752	BAbS19_I16620	identical	hypothetical protein
BruAb1_1753	BAbS19_I16630	identical	S4 domain protein
BruAb1_1754	BAbS19_I16640	identical	ATP-dependent helicase
BruAb1_1755	no match	identical	hypothetical protein
BruAb1_1756	BAbS19_I16650	identical	acetyl-CoA acetyltransferase
BruAb1_1757	BAbS19_I16670	identical	hypothetical protein
BruAb1_1758	BAbS19_I16680	identical	50S ribosomal protein L32
BruAb1_1759	BAbS19_I16690	identical	monofunctional biosynthetic peptidoglycan transglycosylase
BruAb1_1760	BAbS19_I16700	identical	IspA, geranyltranstransferase
BruAb1_1761	BAbS19_I16710	identical	4-hydroxy-3-methylbut-2-en-1-yl diphosphate synthase
BruAb1_1762	BAbS19_I16720	identical	hypothetical D-beta-hydroxybutyrate dehydrogenase
BruAb1_1763	BAbS19_I16730	identical	hypothetical transporter
BruAb1_1764	BAbS19_I16740	identical	Pyc, pyruvate carboxylase
BruAb1_1765	BAbS19_I16750	identical	hypothetical branched-chain amino acid ABC transporter, periplasmic amino acid-binding protein
BruAb1_1766	no match	identical	hypothetical protein
BruAb1_1767	BAbS19_I16760	identical	hypothetical branched-chain amino acid ABC transporter, periplasmic amino acid-binding protein
BruAb1_1768	BAbS19_I16770	identical	hypothetical protein
BruAb1_1769	BAbS19_I16780	identical	branched-chain amino acid ABC transporter, ATP-binding protein
BruAb1_1771	BAbS19_I16800	identical	branched-chain amino acid ABC transporter, permease protein
BruAb1_1772	BAbS19_I16810	identical	branched-chain amino acid ABC transporter, permease protein
BruAb1_1773	BAbS19_I16820	identical	hypothetical proline racemase
BruAb1_1775	BAbS19_I16840	identical	transcriptional regulator, GntR family
BruAb1_1776	BAbS19_I16850	identical	transcriptional regulator, MarR family
BruAb1_1777	BAbS19_I16860	identical	hypothetical protein
BruAb1_1778	BAbS19_I16870	identical	ATP synthase subunit epsilon
BruAb1_1779	BAbS19_I16880	identical	ATP synthase subunit B
BruAb1_1780	BAbS19_I16890	identical	ATP synthase subunit C
BruAb1_1781	BAbS19_I16900	identical	ATP synthase subunit A
BruAb1_1782	BAbS19_I16910	identical	ATP synthase subunit D
BruAb1_1783	BAbS19_I16920	identical	hypothetical protein
BruAb1_1785	BAbS19_I16940	identical	transaldolase
BruAb1_1786	BAbS19_I16950	identical	hypothetical protein
BruAb1_1788	BAbS19_I16970	identical	conserved hypothetical protein TIGR00044
BruAb1_1789	BAbS19_I16980	identical	hypothetical protein
BruAb1_1790	BAbS19_I16990	identical	hypothetical usg protein
BruAb1_1791	BAbS19_I17000	identical	acetyl-coenzyme A synthetase
BruAb1_1792	BAbS19_I17010	identical	hypothetical protein
BruAb1_1793	BAbS19_I17020	identical	heat shock protein HtpX
BruAb1_1794	BAbS19_I17030	identical	Sun, sun protein
BruAb1_1795	BAbS19_I17040	identical	hypothetical protein
BruAb1_1796	BAbS19_I17050	identical	bifunctional phosphoribosylaminoimidazolecarboxamide formyltransferase/IMP cyclohydrolase
BruAb1_1798	BAbS19_I17080	identical	hypothetical protein
BruAb1_1799	BAbS19_I17090	identical	hypothetical protein
BruAb1_1800	BAbS19_I17100	identical	hypothetical protein
BruAb1_1801	BAbS19_I17110	identical	LemA hypothetical
BruAb1_1802	BAbS19_I17120	identical	hypothetical protein
BruAb1_1803	BAbS19_I17130	identical	RpsP, ribosomal protein S16
BruAb1_1804	BAbS19_I17140	identical	chorismate mutase
BruAb1_1805	BAbS19_I17150	identical	Ffh, signal recognition particle protein
BruAb1_1806	BAbS19_I17160	identical	hypothetical protein
BruAb1_1807	BAbS19_I17160	identical	lytic murein transglycosylase, hypothetical
BruAb1_1809	BAbS19_I17180	identical	pyridoxine kinase
BruAb1_1810	BAbS19_I17190	identical	hypothetical protein
BruAb1_1811	BAbS19_I17200	identical	MmsA, methylmalonic acid semialdehyde dehydrogenase
BruAb1_1812	BAbS19_I17210	identical	transcriptional regulator, LysR family
BruAb1_1813	BAbS19_I17220	identical	hypothetical membrane protein
BruAb1_1814	BAbS19_I17230	identical	hypothetical protein
BruAb1_1815	BAbS19_I17240	identical	dinucleoside polyphosphate hydrolase
BruAb1_1816	BAbS19_I17250	identical	carboxyl-terminal protease
BruAb1_1817	BAbS19_I17260	identical	hypothetical protein
BruAb1_1818	BAbS19_I17270	identical	hypothetical protein
BruAb1_1819	BAbS19_I17280	identical	hypothetical protein
BruAb1_1820	BAbS19_I17290	identical	iojap-related protein
BruAb1_1821	BAbS19_I17300	identical	nicotinic acid mononucleotide adenyltransferase
BruAb1_1823	BAbS19_I17320	identical	gamma-glutamyl kinase
BruAb1_1824	BAbS19_I17330	identical	GTP-binding protein, GTP1/OBG family
BruAb1_1825	BAbS19_I17340	identical	hypothetical protein
BruAb1_1826	BAbS19_I17350	identical	acetyltransferase, GNAT family
BruAb1_1827	BAbS19_I17360	identical	acetyltransferase, GNAT family
BruAb1_1828	BAbS19_I17370	identical	50S ribosomal protein L27
BruAb1_1829	BAbS19_I17380	identical	RplU, ribosomal protein L21
BruAb1_1830	BAbS19_I17430	identical	IS2020 transposase
BruAb1_1831	BAbS19_I17400	identical	transcriptional regulator, Cro/CI family
BruAb1_1832	BAbS19_I17410	identical	AzlC family protein
BruAb1_1833	no match	identical	hypothetical protein
BruAb1_1835	BAbS19_I17390	identical	IS2020 transposase
BruAb1_1836	BAbS19_I17440	identical	hypothetical protein
BruAb1_1837	BAbS19_I17450	identical	hypothetical protein
BruAb1_1838	no match	identical	hypothetical protein
BruAb1_1839	no match	identical	hypothetical protein
BruAb1_1841	BAbS19_I17480	identical	hypothetical protein
BruAb1_1842	BAbS19_I17480	identical	hypothetical protein
BruAb1_1843	BAbS19_I17490	identical	ClpB, ATP-dependent Clp protease, ATP-binding subunit ClpB
BruAb1_1844	BAbS19_I17500	identical	hypothetical protein
BruAb1_1845	no match	identical	hypothetical protein
BruAb1_1846	no match	identical	hypothetical protein
BruAb1_1847	BAbS19_I17510	identical	HemK
BruAb1_1848	BAbS19_I17520	identical	peptide chain release factor 1
BruAb1_1849	BAbS19_I17530	identical	PtsP, phosphoenolpyruvate-protein phosphotransferase
BruAb1_1850	BAbS19_I17540	identical	aspartate kinase
BruAb1_1852	BAbS19_I17560	identical	hypothetical membrane protein
BruAb1_1853	BAbS19_I17570	identical	hypothetical protein
BruAb1_1854	BAbS19_I17580	identical	carbon-nitrogen hydrolase family protein
BruAb1_1855	BAbS19_I17590	identical	GrxC, glutaredoxin 3
BruAb1_1856	BAbS19_I17610	identical	competence protein F, hypothetical
BruAb1_1857	BAbS19_I17620	identical	hypothetical protein
BruAb1_1858	BAbS19_I17630	identical	hypothetical protein
BruAb1_1860	no match	identical	hypothetical protein
BruAb1_1861	BAbS19_I17660	identical	hypothetical protein
BruAb1_1862	BAbS19_I17670	identical	hypothetical protein
BruAb1_1863	BAbS19_I17680	identical	uroporphyrinogen-III synthetase
BruAb1_1864	BAbS19_I17690	identical	porphobilinogen deaminase
BruAb1_1865	BAbS19_I17700	identical	Gcp, O-sialoglycoprotein endopeptidase
BruAb1_1867	BAbS19_I17720	identical	hypothetical protein
BruAb1_1868	BAbS19_I17730	identical	hypothetical protein
BruAb1_1869	BAbS19_I17740	identical	hypothetical protein
BruAb1_1870	BAbS19_I17750	identical	hypothetical membrane protein
BruAb1_1871	BAbS19_I17760	identical	transcriptional regulator, GNTR family/aminotransferase Class-I
BruAb1_1873	BAbS19_I17780	identical	Amt, ammonium transporter
BruAb1_1874	BAbS19_I17790	identical	TesB, acyl-CoA thioesterase II
BruAb1_1875	BAbS19_I17800	identical	2-octaprenyl-6-methoxyphenyl hydroxylase
BruAb1_1876	BAbS19_I17810	identical	glyoxalase family protein
BruAb1_1877	BAbS19_I17820	identical	succinate dehydrogenase catalytic subunit
BruAb1_1878	BAbS19_I17830	identical	succinate dehydrogenase
BruAb1_1879	BAbS19_I17840	identical	succinate dehydrogenase, hydrophobic membrane anchor protein
BruAb1_1880	BAbS19_I17850	identical	SdhC, succinate dehydrogenase, cytochrome b556 subunit
BruAb1_1881	BAbS19_I17860	identical	acetyltransferase, GNAT family
BruAb1_1882	BAbS19_I17870	identical	isopropylmalate isomerase large subunit
BruAb1_1883	BAbS19_I17880	identical	50S ribosomal protein L19
BruAb1_1886	BAbS19_I17910	identical	hypothetical protein
BruAb1_1887	BAbS19_I17920	identical	hypothetical protein
BruAb1_1888	BAbS19_I17930	identical	hypothetical protein
BruAb1_1889	BAbS19_I17940	identical	transcriptional regulator, ArsR family
BruAb1_1890	BAbS19_I17950	identical	tRNA (guanine-N(1)-)-methyltransferase
BruAb1_1892	BAbS19_I17970	identical	tyrosine recombinase
BruAb1_1893	BAbS19_I17980	identical	hypothetical protein
BruAb1_1894	BAbS19_I17990	identical	dihydrolipoamide dehydrogenase
BruAb1_1895	BAbS19_I18000	identical	hypothetical protein
BruAb1_1896	BAbS19_I18010	identical	transporter, LysE family
BruAb1_1897	BAbS19_I18020	identical	hypothetical protein
BruAb1_1898	BAbS19_I18030	identical	dihydrolipoamide acetyltransferase
BruAb1_1899	BAbS19_I18040	identical	SucA, 2-oxoglutarate dehydrogenase, E1 component
BruAb1_1900	BAbS19_I18050	identical	hypothetical protein
BruAb1_1901	BAbS19_I18060	identical	succinyl-CoA synthetase alpha subunit
BruAb1_1902	BAbS19_I18070	identical	succinyl-CoA synthetase subunit beta
BruAb1_1903	BAbS19_I18080	identical	malate dehydrogenase
BruAb1_1904	no match	identical	hypothetical protein
BruAb1_1905	BAbS19_I18090	identical	hypothetical protein
BruAb1_1906	BAbS19_I18100	identical	Omp19, lipoprotein Omp19
BruAb1_1907	BAbS19_I18110	identical	hypothetical protein
BruAb1_1908	BAbS19_I18120	identical	diaminopimelate epimerase
BruAb1_1909	BAbS19_I18130	identical	hypothetical protein
BruAb1_1910	BAbS19_I18140	identical	FtsY, signal recognition particle-docking protein
BruAb1_1911	BAbS19_I18150	identical	putative intracellular septation protein
BruAb1_1912	BAbS19_I18160	identical	hydroxyacylglutathione hydrolase, hypothetical
BruAb1_1914	BAbS19_I18180	identical	hypothetical protein
BruAb1_1915	BAbS19_I18190	identical	mutator mutT protein, hypothetical
BruAb1_1916	BAbS19_I18200	identical	acetyltransferase, GNAT family
BruAb1_1917	BAbS19_I18210	identical	bifunctional ornithine acetyltransferase/N-acetylglutamate synthase protein
BruAb1_1918	BAbS19_I18220	identical	hypothetical protein
BruAb1_1919	BAbS19_I18230	identical	peptidyl-prolyl cis-trans isomerase
BruAb1_1920	no match	identical	hypothetical protein
BruAb1_1921	BAbS19_I18240	identical	translocase
BruAb1_1922	BAbS19_I18250	identical	hypothetical protein
BruAb1_1923	BAbS19_I18260	identical	hypothetical protein
BruAb1_1925	BAbS19_I18290	identical	hypothetical protein
BruAb1_1926	no match	identical	hypothetical protein
BruAb1_1927	BAbS19_I18300	identical	transcriptional regulator, LysR family
BruAb1_1928	BAbS19_I18310	identical	hypothetical protein
BruAb1_1929	BAbS19_I18320	identical	amino acid ABC transporter, periplasmic amino acid-binding protein
BruAb1_1931	BAbS19_I18340	identical	amino acid ABC transporter, permease protein
BruAb1_1932	BAbS19_I18350	identical	amino acid ABC transporter, ATP-binding protein
BruAb1_1934	BAbS19_I18370	identical	AspA, aspartate ammonia-lyase
BruAb1_1935	BAbS19_I18380	identical	amino acid ABC transporter, ATP-binding protein
BruAb1_1936	BAbS19_I18390	identical	L-asparaginase type II, hypothetical
BruAb1_1937	BAbS19_I18400	identical	transcriptional regulator, GntR family
BruAb1_1939	BAbS19_I18420	identical	major facilitator family transporter
BruAb1_1940	BAbS19_I18430	identical	hypothetical protein
BruAb1_1941	BAbS19_I18440	identical	methionine gamma-lyase
BruAb1_1942	BAbS19_I18450	identical	universal stress protein family
BruAb1_1945	BAbS19_I18480	identical	3-hydroxybutyryl-CoA dehydrogenase
BruAb1_1946	BAbS19_I18490	identical	EtfA, electron transfer flavoprotein, alpha subunit
BruAb1_1947	BAbS19_I18500	identical	EtfB, electron transfer flavoprotein, beta subunit
BruAb1_1948	BAbS19_I18510	identical	exsB protein
BruAb1_1949	BAbS19_I18520	identical	hypothetical 6-pyruvoyl tetrahydrobiopterin synthase
BruAb1_1950	BAbS19_I18530	identical	hypothetical radical activating enzyme
BruAb1_1951	BAbS19_I18540	identical	ATP:cob(I)alamin adenosyltransferase, hypothetical
BruAb1_1952	BAbS19_I18550	identical	hypothetical protein
BruAb1_1953	BAbS19_I18560	identical	short chain dehydrogenase
BruAb1_1954	BAbS19_I18570	identical	ribonuclease BN, hypothetical
BruAb1_1955	BAbS19_I18580	identical	hypothetical protein
BruAb1_1956	BAbS19_I18590	identical	thiol:disulfide interchange protein, hypothetical
BruAb1_1957	BAbS19_I18600	identical	argininosuccinate lyase
BruAb1_1958	BAbS19_I18610	identical	hypothetical protein
BruAb1_1959	BAbS19_I18620	identical	LysA, diaminopimelate decarboxylase
BruAb1_1960	BAbS19_I18630	identical	hypothetical protein
BruAb1_1961	BAbS19_I18640	identical	hypoxanthine-guanine phosphoribosyltransferase
BruAb1_1962	BAbS19_I18650	identical	hypothetical protein
BruAb1_1963	BAbS19_I18660	identical	histidinol-phosphate aminotransferase
BruAb1_1964	BAbS19_I18670	identical	prephenate dehydrogenase
BruAb1_1965	BAbS19_I18680	identical	hypothetical protein
BruAb1_1966	BAbS19_I18690	identical	cation transport protein, hypothetical
BruAb1_1967	BAbS19_I18700	identical	YGGT family protein
BruAb1_1968	BAbS19_I18710	identical	inorganic pyrophosphatase
BruAb1_1969	BAbS19_I18720	identical	1-acyl-sn-glycerol-3-phosphate acyltransferase, hypothetical
BruAb1_1970	BAbS19_I18730	identical	hypothetical protein
BruAb1_1971	BAbS19_I18740	identical	hypothetical membrane protein
BruAb1_1972	BAbS19_I18750	identical	FtsE, cell division ABC transporter, ATP-binding protein
BruAb1_1973	no match	identical	hypothetical protein
BruAb1_1974	BAbS19_I18760	identical	hypothetical protein
BruAb1_1975	no match	identical	hypothetical protein
BruAb1_1976	BAbS19_I18770	identical	aquaporin Z
BruAb1_1977	BAbS19_I14820	identical	hypothetical protein
BruAb1_1978	BAbS19_I18780	identical	hypothetical protein
BruAb1_1979	BAbS19_I18790	identical	Xth-2, exodeoxyribonuclease III
BruAb1_1980	BAbS19_I18800	identical	cyclic nucleotide-binding protein
BruAb1_1981	BAbS19_I18810	identical	DNA-binding response regulator
BruAb1_1982	BAbS19_I18820	identical	hypothetical protein
BruAb1_1983	no match	identical	hypothetical protein
BruAb1_1985	BAbS19_I18840	identical	hypothetical protein
BruAb1_1986	no match	identical	hypothetical protein
BruAb1_1987	BAbS19_I18850	identical	hypothetical protein
BruAb1_1989	BAbS19_I18880	identical	hypothetical membrane protein
BruAb1_1990	BAbS19_I18890	identical	50S ribosomal protein L28
BruAb1_1991	BAbS19_I18900	identical	hypothetical protein
BruAb1_1992	BAbS19_I18910	identical	transcriptional regulator, MerR family
BruAb1_1994	BAbS19_I18930	identical	hypothetical protein
BruAb1_1995	BAbS19_I18940	identical	hypothetical protein
BruAb1_1997	BAbS19_I18960	identical	cobalamin biosynthesis protein, hypothetical
BruAb1_1998	no match	identical	hypothetical protein
BruAb1_1999	BAbS19_I18970	identical	DnaJ domain protein
BruAb1_2000	no match	identical	hypothetical protein
BruAb1_2001	BAbS19_I18980	identical	BolA, bolA protein
BruAb1_2002	BAbS19_I18990	identical	CBS domain protein
BruAb1_2003	BAbS19_I19000	identical	3-dehydroquinate synthase
BruAb1_2004	BAbS19_I19010	identical	AroK, shikimate kinase
BruAb1_2005	BAbS19_I19020	identical	hypothetical protein
BruAb1_2006	BAbS19_I19030	identical	tyrosine recombinase
BruAb1_2007	BAbS19_I19040	identical	acetyl-CoA carboxylase alpha subunit
BruAb1_2008	BAbS19_I19050	identical	lipoprotein, hypothetical
BruAb1_2009	BAbS19_I19060	identical	hypothetical protein
BruAb1_2010	BAbS19_I19070	identical	cobalamin synthesis protein/P47K family protein
BruAb1_2011	BAbS19_I19080	identical	D-alanyl-D-alanine carboxypeptidase
BruAb1_2012	BAbS19_I19090	identical	Peptidase, M20/M25/M40 family
BruAb1_2013	no match	identical	hypothetical protein
BruAb1_2014	BAbS19_I19100	identical	glucose 1-dehydrogenase, hypothetical
BruAb1_2015	BAbS19_I19110	identical	hypothetical protein
BruAb1_2016	BAbS19_I19120	identical	hypothetical protein
BruAb1_2017	BAbS19_I19130	identical	L-sorbose dehydrogenase, FAD dependent, hypothetical
BruAb1_2018	BAbS19_I19140	identical	3-ketoacyl-(acyl-carrier-protein) reductase
BruAb1_2019	BAbS19_I19150	identical	oxidoreductase, GMC family
BruAb1_2020	BAbS19_I19160	identical	L-sorbosone dehydrogenase, NAD(P) dependent
BruAb1_2021	BAbS19_I19170	identical	enoyl-CoA hydratase/isomerase family protein
BruAb1_2023	BAbS19_I19190	identical	oxidoreductase, Gfo/Idh/MocA family
BruAb1_2024	BAbS19_I19200	identical	transcriptional regulator, LacI family
BruAb1_2025	BAbS19_I19210	identical	hypothetical protein
BruAb1_2027	no match	identical	hypothetical protein
BruAb1_2028	BAbS19_I19230	identical	ABC transporter, periplasmic substrate-binding protein, hypothetical
BruAb1_2029	no match	identical	hypothetical protein
BruAb1_2030	BAbS19_I19240	identical	branched-chain amino acid ABC transporter, permease protein
BruAb1_2031	BAbS19_I19250	identical	ABC transporter, ATP-binding protein
BruAb1_2032	BAbS19_I19260	identical	hypothetical protein
BruAb1_2033	BAbS19_I19270	identical	ParB, chromosome partitioning protein ParB
BruAb1_2034	BAbS19_I19280	identical	ParA, chromosome partitioning protein
BruAb1_2035	BAbS19_I19290	identical	glucose-inhibited division protein B
BruAb1_2036	BAbS19_I19300	identical	glucose-inhibited division protein A
BruAb1_2037	BAbS19_I19310	identical	tRNA modification GTPase
BruAb1_2038	BAbS19_I19320	identical	hypothetical protein
BruAb1_2039	BAbS19_I19330	identical	transcription termination factor Rho
BruAb1_2040	BAbS19_I19340	identical	hypothetical membrane protein
BruAb1_2041	BAbS19_I19350	identical	uroporphyrinogen decarboxylase
BruAb1_2042	BAbS19_I19360	identical	hypothetical protein
BruAb1_2043	BAbS19_I19370	identical	Maf-like protein
BruAb1_2044	BAbS19_I19380	identical	shikimate 5-dehydrogenase
BruAb1_2045	BAbS19_I19390	identical	dephospho-CoA kinase
BruAb1_2047	BAbS19_I19410	identical	export protein SecB
BruAb1_2048	BAbS19_I19420	identical	BfxsA protein, hypothetical
BruAb1_2050	BAbS19_I19440	identical	transglycosylase-related protein
BruAb1_2051	BAbS19_I19450	identical	Smr family protein
BruAb1_2052	BAbS19_I19460	identical	hypothetical protein
BruAb1_2053	BAbS19_I19470	identical	hypothetical protein
BruAb1_2054	BAbS19_I19480	identical	ATP-dependent protease ATP-binding subunit
BruAb1_2055	BAbS19_I19490	identical	ATP-dependent protease peptidase subunit
BruAb1_2056	BAbS19_I19500	identical	imidazoleglycerol-phosphate dehydratase
BruAb1_2057	BAbS19_I19510	identical	hypothetical protein
BruAb1_2058	BAbS19_I19520	identical	imidazole glycerol phosphate synthase subunit HisH
BruAb1_2059	BAbS19_I19530	identical	1-(5-phosphoribosyl)-5-[(5-phosphoribosylamino)methylideneamino] imidazole-4-carboxamide isomerase
BruAb1_2060	BAbS19_I19540	identical	imidazole glycerol phosphate synthase subunit HisF
BruAb1_2061	BAbS19_I19550	identical	phosphoribosyl-ATP pyrophosphatase
BruAb1_2062	BAbS19_I19560	identical	pantothenate kinase
BruAb1_2063	BAbS19_I19570	identical	hypothetical protein
[truncated: 1,088 more rows]

## Sheet: 3D.2308_genes_to_S19_genome
Table S3D. Pair-wise and reciprocal comparisons between the genes and the genomes of the strains S19, 9-941 and 2308
2308_RefSeq ID	corresponding S19 gene0	type of difference	RefSeq annotation
BAB1_0069	BAbS19_I00660	1695 bases insertion	hypothetical protein
BAB2_0369	BAbS19_II03470	247 bases insertion at the end	Putative sugar-binding domain
BAB2_0370	BAbS19_II03470	423 bases insertion at the beginning	D-erythrulose 4-phosphate dehydrogenase
BAB2_0376	BAbS19_II03540	68 bases insertion	Bacterial inner-membrane translocator:Sodium:dicarboxylate symporter
BAB1_1673	BAbS19_I15660	twelve bases insertion	ATP-binding region, ATPase-like:Histidine kinase
BAB1_1968	BAbS19_I18470 # BAbS19_I18460	seven bases deletion	ATP/GTP-binding site motif A (P-loop):Pyridoxal-5'-phosphate-dependent enzyme, beta family:Glucose/ribitol dehydrogenase:Cyst...
BAB1_0019	BAbS19_I00160	seven bases insertion	Carboxyl transferase family
BAB1_1837	BAbS19_I17170	three, one base deletion and two bases deletion	Carbonic anhydrase, prokaryotic
BAB1_0181	BAbS19_I01720	two bases difference	Nitrite/sulfite reductase ferredoxin-like half domain:Nitrite and sulfite reductase iron-sulfur/siroheme-binding site:Nitrite...
BAB1_0447	BAbS19_I04130	two bases difference	Short-chain dehydrogenase/reductase SDR:Glucose/ribitol dehydrogenase
BAB1_0551	BAbS19_I05160	two bases difference	Transposase, IS4
BAB1_0450	no match	one base deletion	hypothetical protein
BAB1_1158	no match	one base deletion	hypothetical protein
BAB1_1354	BAbS19_I12650	one base deletion	DedA family
BAB2_0384	BAbS19_II03610	one base deletion	epimerase/dehydratase family protein, putative
BAB2_0994	BAbS19_II09200	one base deletion	hypothetical protein
BAB2_1035	BAbS19_II09620	one base deletion	Aldehyde dehydrogenase
BAB1_0237	BAbS19_I02220	one base insertion	Bacterial regulatory protein, MarR family:Bacterial regulatory proteins, IclR family
BAB1_1554	BAbS19_I14530	one base insertion	MaoC-like dehydratase
BAB1_1862	BAbS19_I17420	one base insertion	hypothetical protein
BAB1_0010	BAbS19_I00100	one base difference	Bacterial extracellular solute-binding protein, family 5
BAB1_0057	BAbS19_I00540	one base difference	Bacterial regulatory protein LysR, HTH motif:LysR substrate binding domain
BAB1_0149	BAbS19_I01410	one base difference	tRNA/rRNA methyltransferase (SpoU)
BAB1_0214	BAbS19_I02010	one base difference	ABC transporter substrate-binding protein KO: K02051 sulfonate/nitrate transport system substrate-binding protein
BAB1_0224	BAbS19_I02110	one base difference	ATP/GTP-binding site motif A (P-loop):ABC transporter:AAA ATPase
BAB1_0236	BAbS19_I02210	one base difference	Amidohydrolase 2
BAB1_0272	no match	one base difference	hypothetical protein
BAB1_0282	BAbS19_I02570	one base difference	RNA binding S1:Translation initiation factor IF-1:S1 domain, IF1 type
BAB1_0333	BAbS19_I03030	one base difference	Hsp33 protein
BAB1_0462	BAbS19_I04270	one base difference	Transketolase, N terminal:Transketolase, central region:Transketolase, C terminal:Deoxyxylulose-5-phosphate synthase
BAB1_0557	BAbS19_I05120	one base difference	ISBm1, transposase orfA
BAB1_0638	BAbS19_I05980	one base difference	Rhodopsin-like GPCR superfamily:Glutamate-ammonia ligase adenylyltransferase
BAB1_0660	BAbS19_I06190	one base difference	ATP/GTP-binding site motif A (P-loop):Porin, alpha proteobacteria type
BAB1_0721	BAbS19_I06740	one base difference	Short-chain dehydrogenase/reductase SDR:Glucose/ribitol dehydrogenase
BAB1_0768	BAbS19_I07170	one base difference	Binding-protein-dependent transport systems inner membrane component:Tetracycline resistance protein
BAB1_0773	BAbS19_I07220	one base difference	Lipocalin-related protein and Bos/Can/Equ allergen:Ppx/GppA phosphatase
BAB1_0774	BAbS19_I07230	one base difference	HRDC domain:3'-5' exonuclease:Ribonuclease D
BAB1_0778	BAbS19_I07270	one base difference	Phosphofructokinase:Arginine-tRNA-protein transferase, N-terminal:Arginine-tRNA-protein transferase, C-terminal
BAB1_0847	BAbS19_I07890	one base difference	hypothetical protein
BAB1_0854	BAbS19_I07960	one base difference	Tetracycline resistance protein TetB:Drug resistance transporter Bcr/CflA subfamily:General substrate transporter:Major facil...
BAB1_0928	BAbS19_I08680	one base difference	TPR repeat
BAB1_0937	BAbS19_I08760	one base difference	Transposase, IS4
BAB1_1031	BAbS19_I09570	one base difference	Aminoacyl-tRNA synthetase, class I:DAHP synthetase, classII
BAB1_1085	BAbS19_I10070	one base difference	SAM (and some other nucleotide) binding motif:TPR repeat
BAB1_1131	BAbS19_I10500	one base difference	CbxX/CfqX superfamily:ATP/GTP-binding site motif A (P-loop):Bacterial chromosomal replication initiator protein, DnaA:AAA ATP...
BAB1_1151	BAbS19_I10690	one base difference	Biotin/lipoyl attachment:2-oxo acid dehydrogenase, acyltransferase component, lipoyl-binding:Transketolase, central region:Tr...
BAB1_1157	BAbS19_I10750	one base difference	Glutamine amidotransferase class-I:CTP synthase
BAB1_1213	BAbS19_I11290	one base difference	hypothetical protein
BAB1_1216	BAbS19_I11320	one base difference	Tetracycline resistance protein TetB
BAB1_1242	BAbS19_I11580	one base difference	Ribosomal protein S14
BAB1_1243	BAbS19_I11590	one base difference	Ribosomal protein L5:Mitochondrial ribosomal protein L5
BAB1_1344	BAbS19_I12550	one base difference	Acriflavin resistance protein:SecD/SecF/SecDF export membrane protein:SecF protein:SecD export membrane protein
BAB1_1373	no match	one base difference	ATP/GTP-binding site motif A (P-loop)
BAB1_1444	BAbS19_I13500	one base difference	Cell division protein FtsZ:Tubulin family:Proline-rich region:Tubulin/FtsZ protein
BAB1_1473	BAbS19_I13770	one base difference	SAM (and some other nucleotide) binding motif
BAB1_1530	BAbS19_I14270	one base difference	DEAD/DEAH box helicase:Helicase, C-terminal:ATP/GTP-binding site motif A (P-loop):UvrB/UvrC protein:Excinuclease ABC, B subunit
BAB1_1627	BAbS19_I15200	one base difference	ATP/GTP-binding site motif A (P-loop):ABC transporter:AAA ATPase:Spermidine/putrescine ABC transporter ATP-binding subunit
BAB1_1845	BAbS19_I17250	one base difference	PDZ/DHR/GLGF domain:Tail specific protease:Carboxyl-terminal protease
BAB1_2019	BAbS19_I18920	one base difference	DNA gyrase, subunit B:H+ transporting ATPase, proton pump:Cadmium-transporting ATPase:ATP/GTP-binding site motif A (P-loop):A...
BAB1_2072	BAbS19_I19400	one base difference	Beta tubulin:DNA polymerase III, epsilon subunit:Exonuclease:DNA polymerase 3, epsilon subunit
BAB1_2097	BAbS19_I19630	one base difference	Phosphocarrier HPr protein:Histidine phosphorylation site in HPr protein
BAB2_0064	BAbS19_II00590	one base difference	attachment mediating protein virB5 homolog KO: K03200 type IV secretion system protein VirB5
BAB2_0175	BAbS19_II01660	one base difference	FAD linked oxidase, C-terminal:FAD linked oxidase, N-terminal
BAB2_0281	BAbS19_II02680	one base difference	ATP/GTP-binding site motif A (P-loop):ABC transporter:AAA ATPase
BAB2_0291	no match	one base difference	hypothetical protein
BAB2_0299	BAbS19_II02830	one base difference	Flagellar hook-length control protein:ATP/GTP-binding site motif A (P-loop):Peptidase family S16:ABC transporter:AAA ATPase
BAB2_0308	BAbS19_II02920	one base difference	Bacterial regulatory protein, GntR family
BAB2_0444	BAbS19_II04190	one base difference	NAD binding site:Enoyl-CoA hydratase/isomerase:3-hydroxyacyl-CoA dehydrogenase, C-terminal:3-hydroxyacyl-CoA dehydrogenase, N...
BAB2_0470	BAbS19_II04440	one base difference	hypothetical protein
BAB2_0500	BAbS19_II04710	one base difference	ATP/GTP-binding site motif A (P-loop):ABC transporter:AAA ATPase:Glycine betaine/L-proline transport ATP-binding subunit
BAB2_0526	BAbS19_II04960	one base difference	Carbohydrate kinase, PfkB
BAB2_0532	BAbS19_II05020	one base difference	Alkylhydroperoxidase AhpD:Alkylhydroperoxidase AhpD core domain
BAB2_0582	BAbS19_II05450	one base difference	Disease resistance protein:ATP/GTP-binding site motif A (P-loop):ABC transporter:AAA ATPase
BAB2_0587	BAbS19_II05500	one base difference	Regulator of chromosome condensation, RCC1:Adenine deaminase:Amidohydrolase
BAB2_0635	BAbS19_II05930	one base difference	Ribonuclease II:RNA binding S1:VacB and RNase II family 3'-5' exoribonuclease
BAB2_0652	BAbS19_II06090	one base difference	PAS domain:PAS-associated C-terminal domain:PAC motif
BAB2_0661	BAbS19_II06180	one base difference	DEAD/DEAH box helicase:Helicase, C-terminal:ATP/GTP-binding site motif A (P-loop):Haem peroxidase:Transcription-repair coupli...
BAB2_0726	BAbS19_II06760	one base difference	ybgT protein
BAB2_0792	BAbS19_II07340	one base difference	Protein of unknown function DUF25
BAB2_0810	BAbS19_II07490	one base difference	ROK family:FMN/related compound-binding core:Putative N-acetylmannosamine-6-phosphate epimerase
BAB2_0838	BAbS19_II07760	one base difference	Iron permease FTR1
BAB2_0846	BAbS19_II07830	one base difference	Frizzled protein
BAB2_0876	BAbS19_II08080	one base difference	Binding-protein-dependent transport systems inner membrane component
BAB2_1064	BAbS19_II09920	one base difference	Binding-protein-dependent transport systems inner membrane component:Prenyl group binding site (CAAX box):Bacterial general s...
BAB2_1098	BAbS19_II10230	one base difference	Flagellar basal body rod protein:Trypsin inhibitor Kunitz
BAB2_1113	BAbS19_II10370	one base difference	Helix-turn-helix, AraC type
BAB2_1127	BAbS19_II10510	one base difference	N-6 Adenine-specific DNA methylase
BAB2_1150	BAbS19_II10730	one base difference	TonB-dependent receptor protein:Pollen allergen Poa pIX/Phl pVI, C-terminal
BAB1_0001	BAbS19_I00010	identical	ATP/GTP-binding site motif A (P-loop):Bacterial chromosomal replication initiator protein, DnaA:AAA ATPase:Neutral zinc metal...
BAB1_0002	BAbS19_I00020	identical	DNA polymerase III, beta chain:Inorganic pyrophosphatase
BAB1_0003	BAbS19_I00030	identical	RecF protein:ATP/GTP-binding site motif A (P-loop):Aldehyde dehydrogenase:SMC protein, N-terminal:AAA ATPase
BAB1_0004	BAbS19_I00040	identical	NAD binding site:UBA/THIF-type NAD/FAD binding fold:Aromatic-ring hydroxylase
BAB1_0005	BAbS19_I00050	identical	Pyridine nucleotide-disulphide oxidoreductase, class I:D-isomer specific 2-hydroxyacid dehydrogenase, NAD binding domain
BAB1_0006	BAbS19_I00060	identical	ATP/GTP-binding site motif A (P-loop):ABC transporter:AAA ATPase
BAB1_0007	BAbS19_I00070	identical	Binding-protein-dependent transport systems inner membrane component
BAB1_0008	BAbS19_I00080	identical	Binding-protein-dependent transport systems inner membrane component
BAB1_0009	BAbS19_I00090	identical	Bacterial extracellular solute-binding protein, family 5
BAB1_0011	no match	identical	hypothetical protein
BAB1_0012	BAbS19_I00110	identical	hypothetical protein
BAB1_0013	no match	identical	hypothetical protein
BAB1_0015	no match	identical	hypothetical protein
BAB1_0016	BAbS19_I00130	identical	Enoyl-CoA hydratase/isomerase
BAB1_0017	BAbS19_I00140	identical	HMG-CoA lyase-like
BAB1_0018	BAbS19_I00150	identical	Biotin/lipoyl attachment:Biotin-requiring enzyme, attachment site:Carbamoyl-phosphate synthase L chain, ATP-binding:Carbamoyl...
BAB1_0022	BAbS19_I00210	identical	hypothetical protein
BAB1_0023	BAbS19_I00220	identical	ATP/GTP-binding site motif A (P-loop):EPSP synthase (3-phosphoshikimate 1-carboxyvinyltransferase):3-phosphoshikimate 1-carbo...
BAB1_0024	BAbS19_I00230	identical	Cytidylate kinase
BAB1_0025	BAbS19_I00240	identical	Ribosomal protein S1:RNA binding S1
BAB1_0026	BAbS19_I00250	identical	Conserved hypothetical protein 698
BAB1_0027	BAbS19_I00260	identical	Bacterial regulatory protein LysR, HTH motif:LysR substrate binding domain
BAB1_0028	BAbS19_I00270	identical	transglycosylase, putative
BAB1_0029	BAbS19_I00280	identical	RecR protein:Toprim sub-domain:TOPRIM
BAB1_0030	BAbS19_I00290	identical	Conserved hypothetical protein 103
BAB1_0031	BAbS19_I00300	identical	Replication factor C conserved domain:ATP/GTP-binding site motif A (P-loop):AAA ATPase:AAA ATPase, central region
BAB1_0032	BAbS19_I00310	identical	hit1 protein
BAB1_0033	BAbS19_I00320	identical	NUDIX hydrolase
BAB1_0034	BAbS19_I00330	identical	Prephenate dehydratase:Amino acid-binding ACT
BAB1_0035	BAbS19_I00340	identical	Acylneuraminate cytidylyltransferase:3-deoxy-D-manno-octulosonate cytidylyltransferase
BAB1_0036	BAbS19_I00350	identical	Cytochrome c heme-binding site:Cytochrome c, class IA/ IB:Cytochrome c, class I:Cytochrome c, class IC
BAB1_0037	BAbS19_I00360	identical	molybdopterin biosynthesis enzyme
BAB1_0038	BAbS19_I00370	identical	Copper center Cu(A):Cytochrome o ubiquinol oxidase subunit II
BAB1_0041	BAbS19_I00400	identical	Cytochrome c oxidase, subunit III
BAB1_0042	BAbS19_I00410	identical	Prokaryotic Cytochrome C oxidase subunit IV
BAB1_0043	no match	identical	hypothetical protein
BAB1_0045	BAbS19_I00430	identical	Bacterial surface antigen (D15)
BAB1_0046	BAbS19_I00440	identical	Family of unknown function DUF490
BAB1_0047	BAbS19_I00450	identical	ErfK/YbiS/YcfS/YnhG:Twin-arginine translocation pathway signal
BAB1_0048	BAbS19_I00460	identical	hypothetical protein
BAB1_0049	BAbS19_I00470	identical	hypothetical protein
BAB1_0050	BAbS19_I00480	identical	hypothetical protein
BAB1_0051	BAbS19_I00490	identical	Protein of unknown function DUF461
BAB1_0052	BAbS19_I00500	identical	hypothetical protein
BAB1_0053	BAbS19_I00510	identical	Glyoxalase/Bleomycin resistance protein/dioxygenase domain:Glyoxalase I
BAB1_0054	BAbS19_I00520	identical	TonB-dependent receptor protein:Mrp family:ATP/GTP-binding site motif A (P-loop):Protein of unknown function DUF59
BAB1_0055	BAbS19_I00530	identical	Phosphoglucomutase/phosphomannomutase:Phosphogluc omutase/phosphomannomutase C terminal:Phosphoglucomutase/phosphomannomutase ...
BAB1_0056	no match	identical	hypothetical protein
BAB1_0058	BAbS19_I00550	identical	Esterase/lipase/thioesterase, active site
BAB1_0059	BAbS19_I00560	identical	Uridine kinase:ATP/GTP-binding site motif A (P-loop)
BAB1_0060	BAbS19_I00570	identical	Fumarylacetoacetate (FAA) hydrolase
BAB1_0061	BAbS19_I00580	identical	hypothetical protein
BAB1_0062	BAbS19_I00590	identical	hypothetical protein
BAB1_0063	BAbS19_I00600	identical	hypothetical protein
BAB1_0064	BAbS19_I00610	identical	SLT domain
BAB1_0065	BAbS19_I00620	identical	Hly-III related proteins
BAB1_0066	BAbS19_I00630	identical	Immunoglobulin/major histocompatibility complex:Phosphoesterase PHP, N-terminal:DNA polymerase III alpha subunit
BAB1_0067	BAbS19_I00640	identical	hypothetical protein
BAB1_0068	BAbS19_I00650	identical	hypothetical protein
BAB1_0070	no match	identical	hypothetical protein
BAB1_0071	BAbS19_I00670	identical	Argininosuccinate synthase
BAB1_0072	BAbS19_I00680	identical	Lysine exporter protein (LYSE/YGGA)
BAB1_0073	BAbS19_I00690	identical	hypothetical protein
BAB1_0074	BAbS19_I00700	identical	Cytochrome c heme-binding site:Conserved hypothetical protein 48:Radical SAM
BAB1_0075	BAbS19_I00710	identical	hypothetical protein
BAB1_0076	BAbS19_I00720	identical	hypothetical protein
BAB1_0077	BAbS19_I00730	identical	Transcriptional coactivator/pterin dehydratase
BAB1_0080	BAbS19_I00750	identical	2`-5` RNA ligase, putative
BAB1_0081	BAbS19_I00760	identical	Lipolytic enzyme, G-D-S-L family
BAB1_0082	BAbS19_I00770	identical	ATP/GTP-binding site motif A (P-loop):ABC transporter:AAA ATPase:Sugar transporter superfamily
BAB1_0083	BAbS19_I00780	identical	Protein of unknown function DUF214
BAB1_0084	BAbS19_I00790	identical	hypothetical protein
BAB1_0087	BAbS19_I00820	identical	hypothetical protein
BAB1_0088	BAbS19_I00830	identical	hypothetical protein
BAB1_0089	BAbS19_I00840	identical	hypothetical protein
BAB1_0090	BAbS19_I00850	identical	Aconitate hydratase, C-terminal:Aconitate hydratase, N-terminal:Aconitate hydratase 1
BAB1_0091	BAbS19_I00860	identical	ATP/GTP-binding site motif A (P-loop):ABC transporter:AAA ATPase:Heme exporter protein CcmA
BAB1_0092	BAbS19_I00870	identical	SecY protein:Cytochrome c-type biogenesis protein CcmB
BAB1_0093	BAbS19_I00880	identical	Cytochrome c assembly protein:Cytochrome c-type biogenesis protein CcmC
BAB1_0094	BAbS19_I00890	identical	Heme exporter protein D (CcmD)
BAB1_0095	BAbS19_I00900	identical	Periplasmic protein thiol:disulfide oxidoreductase DsbE:Thioredoxin type domain:Thioredoxin domain 2
BAB1_0096	BAbS19_I00910	identical	Dihydroxy-acid and 6-phosphogluconate dehydratase:Dihydroxy-acid dehydratase
BAB1_0097	BAbS19_I00920	identical	hypothetical protein
BAB1_0098	BAbS19_I00930	identical	hypothetical protein
BAB1_0099	BAbS19_I00940	identical	Response regulator receiver
BAB1_0100	BAbS19_I00950	identical	transcriptional regulator, putative
BAB1_0101	BAbS19_I00960	identical	hypothetical protein
BAB1_0102	BAbS19_I00970	identical	Formate/nitrite transporter
BAB1_0103	BAbS19_I00980	identical	hypothetical protein
BAB1_0104	BAbS19_I00990	identical	Prokaryotic sulfate-/thiosulfate-binding protein:Bacterial extracellular solute-binding protein, family 1
BAB1_0105	BAbS19_I01000	identical	Binding-protein-dependent transport systems inner membrane component
BAB1_0106	BAbS19_I01010	identical	Binding-protein-dependent transport systems inner membrane component:NADH-plastoquinone oxidoreductase, chain 5
BAB1_0107	BAbS19_I01020	identical	ATP/GTP-binding site motif A (P-loop):ABC transporter:AAA ATPase
BAB1_0108	BAbS19_I01030	identical	cyclic beta 1-2 glucan synthetase
BAB1_0109	BAbS19_I01040	identical	Nicotinate phosphoribosyltransferase:Nicotinate phosphoribosyltransferase and related
BAB1_0110	BAbS19_I01050	identical	Phenazine biosynthesis PhzC/PhzF protein
BAB1_0111	BAbS19_I01060	identical	SAM (and some other nucleotide) binding motif:Generic methyltransferase
BAB1_0112	BAbS19_I01070	identical	Ribokinase:Carbohydrate kinase, PfkB
BAB1_0113	BAbS19_I01080	identical	Short-chain dehydrogenase/reductase SDR:Glucose/ribitol dehydrogenase
BAB1_0114	BAbS19_I01090	identical	Glycosyl transferase, family 51:Penicillin-binding protein, transpeptidase domain:ATP/GTP-binding site motif A (P-loop)
BAB1_0115	BAbS19_I01100	identical	outer membrane protein, putative
BAB1_0116	BAbS19_I01110	identical	outer membrane protein, putative
BAB1_0117	BAbS19_I01120	identical	3'-5' exonuclease
BAB1_0118	BAbS19_I01130	identical	Peptidase M20/M25/M40
BAB1_0119	no match	identical	hypothetical protein
BAB1_0120	BAbS19_I01140	identical	5'3'-Exonuclease N-and I-domain:DNA-directed DNA polymerase:DNA polymerase, family A:5'-3' exonuclease:3'-5' exonuclease:Hel...
BAB1_0121	BAbS19_I01150	identical	Lipocalin-related protein and Bos/Can/Equ allergen:ATP-dependent helicase, DEAD-box:DEAD/DEAH box helicase:Helicase, C-termin...
BAB1_0122	BAbS19_I01160	identical	Topoisomerase IV, subunit B:DNA gyrase, subunit B:DNA topoisomerase II:DNA gyrase, subunit B, C-terminal:ATP-binding region, ...
BAB1_0123	BAbS19_I01170	identical	hypothetical protein
BAB1_0124	BAbS19_I01180	identical	Esterase/lipase/thioesterase, active site:Putative esterase
BAB1_0127	BAbS19_I01210	identical	GCN5-related N-acetyltransferase
BAB1_0128	BAbS19_I01220	identical	NAD binding site:Zinc-containing alcohol dehydrogenase superfamily:Zinc-containing alcohol dehydrogenase
BAB1_0129	BAbS19_I01230	identical	Protein of unknown function DUF156
BAB1_0132	BAbS19_I01250	identical	ATP-binding region, ATPase-like:Histidine kinase A, N-terminal:Bacterial sensor protein, C-terminal:Histidine kinase
BAB1_0133	BAbS19_I01260	identical	IS711, transposase orfA
BAB1_0134	BAbS19_I01270	identical	Transposase, IS4
BAB1_0135	no match	identical	hypothetical protein
BAB1_0136	BAbS19_I01280	identical	Response regulator receiver:Helix-turn-helix, Fis-type
BAB1_0137	BAbS19_I01290	identical	hypothetical protein
BAB1_0138	BAbS19_I01300	identical	ErfK/YbiS/YcfS/YnhG
BAB1_0139	BAbS19_I01310	identical	Nitrogen-fixing NifU, C-terminal
BAB1_0140	BAbS19_I01320	identical	hypothetical protein
BAB1_0141	BAbS19_I01330	identical	Aminoacyl-tRNA synthetase, class I:Aminoacyl-tRNA synthetase, class Ib:Tryptophanyl-tRNA synthetase, class Ib
BAB1_0142	BAbS19_I01340	identical	Virulence factor MVIN-like
BAB1_0143	BAbS19_I01350	identical	Amino acid-binding ACT:Metal dependent phosphohydrolase, HD region:Metal-dependent phosphohydrolase, HD region
BAB1_0146	BAbS19_I01380	identical	DNA mismatch repair protein MutS, C-terminal:Aldo/keto reductase:ATP/GTP-binding site motif A (P-loop):MutS 1 protein:DNA mis...
BAB1_0147	BAbS19_I01390	identical	hypothetical protein
BAB1_0148	BAbS19_I01400	identical	Signal peptidase II, family A8
BAB1_0151	BAbS19_I01440	identical	hypothetical protein
BAB1_0152	BAbS19_I01450	identical	Histone-like bacterial DNA-binding protein:Integration host factor, beta subunit
BAB1_0153	BAbS19_I01460	identical	Clp protease:Peptidase U7:Signal peptide peptidase, SppA 36 kDa type
BAB1_0154	BAbS19_I01470	identical	hypothetical protein
BAB1_0155	BAbS19_I01480	identical	OstA-like protein
BAB1_0156	BAbS19_I01490	identical	ATP/GTP-binding site motif A (P-loop):ABC transporter:AAA ATPase
BAB1_0157	BAbS19_I01500	identical	Sigma-54 factor family:Sigma-54 factor, core binding domain:Sigma-54, DNA-binding domain
BAB1_0158	no match	identical	hypothetical protein
BAB1_0159	BAbS19_I01510	identical	Sigma 54 modulation protein/ribosomal protein S30EA
BAB1_0160	BAbS19_I01520	identical	Phosphoenolpyruvate-dependent sugar phosphotransferase system, EIIA 2:PTS IIA-like nitrogen-regulatory protein PtsN
BAB1_0161	BAbS19_I01530	identical	hypothetical protein
BAB1_0162	BAbS19_I01540	identical	Heat shock protein Hsp20
BAB1_0163	BAbS19_I01550	identical	hypothetical protein
BAB1_0164	BAbS19_I01560	identical	hypothetical protein
BAB1_0165	BAbS19_I01570	identical	Helix-hairpin-helix motif:HhH-GPD:Helix-hairpin-helix DNA-binding, class 1:Endonuclease III, HhH:Endonuclease III/Nth
BAB1_0166	BAbS19_I01580	identical	Sodium:dicarboxylate symporter:Protein of unknown function DUF540
BAB1_0167	no match	identical	hypothetical protein
BAB1_0168	BAbS19_I01590	identical	Ribokinase:Carbohydrate kinase, PfkB
BAB1_0169	BAbS19_I01600	identical	hypothetical protein
BAB1_0170	BAbS19_I01610	identical	GrpE protein
BAB1_0171	BAbS19_I01620	identical	Negative regulator of class I heat shock protein
BAB1_0172	BAbS19_I01630	identical	3' exoribonuclease:Ribonuclease PH
BAB1_0175	BAbS19_I01660	identical	Ham1-like protein
BAB1_0176	BAbS19_I01670	identical	Putative oxygen-independent coproporphyrinogen III oxidase:Elongator protein 3/MiaB/NifB:Radical SAM
BAB1_0177	BAbS19_I01680	identical	Uroporphyrin-III C/tetrapyrrole (Corrin/Porphyrin) methyltransferase:ATP/GTP-binding site motif A (P-loop):Protein of unknown...
BAB1_0178	BAbS19_I01690	identical	hypothetical protein
BAB1_0179	BAbS19_I01700	identical	Uroporphyrin-III C/tetrapyrrole (Corrin/Porphyrin) methyltransferase:Pyrokinin:Uroporphiryn-III C-methyltransferase:Uroporphy...
BAB1_0180	BAbS19_I01710	identical	hypothetical protein
BAB1_0182	BAbS19_I01730	identical	Phosphoadenosine phosphosulfate reductase:Phosphoadenosine phosphosulfate reductase CysH-type
BAB1_0183	BAbS19_I01740	identical	hypothetical protein
BAB1_0184	BAbS19_I01750	identical	hypothetical protein
BAB1_0185	BAbS19_I01760	identical	Methylated-DNA-[protein]-cysteine S-methyltransferase
BAB1_0186	BAbS19_I01770	identical	hypothetical protein
BAB1_0187	BAbS19_I01780	identical	hypothetical protein
BAB1_0188	BAbS19_I01790	identical	Dihydropteroate synthase, DHPS:Homocysteine S-methyltransferase:Cobalamin-dependent methionine synthase, B12-binding:Vitamin ...
BAB1_0189	no match	identical	hypothetical protein
BAB1_0190	BAbS19_I01800	identical	Bacterial regulatory protein, LuxR family:Autoinducer binding domain
BAB1_0191	BAbS19_I01810	identical	Aminotransferase class-III:Maltose binding protein
BAB1_0192	no match	identical	hypothetical protein
BAB1_0193	BAbS19_I01820	identical	Phosphoadenosine phosphosulfate reductase
BAB1_0194	BAbS19_I01830	identical	Shikimate kinase:Uridine kinase:Elongation factor, GTP-binding:ATP/GTP-binding site motif A (P-loop):Adenylylsulfate kinase:E...
BAB1_0195	BAbS19_I01840	identical	Inositol phosphatase/fructose-1,6-bisphosphatase:Inositol monophosphatase:3(2),5-bisphosphate nucleotidase, bacterial
BAB1_0196	BAbS19_I01850	identical	Bacterial regulatory proteins, AsnC family:Cyclic nucleotide-binding domain:Bacterial regulatory protein, Crp family
BAB1_0197	BAbS19_I01860	identical	Bacterial regulatory protein, LuxR family
BAB1_0198	no match	identical	hypothetical protein
BAB1_0199	BAbS19_I01870	identical	Bacterial regulatory protein, DeoR family
BAB1_0200	BAbS19_I01880	identical	FAD-dependent glycerol-3-phosphate dehydrogenase:FAD dependent oxidoreductase
BAB1_0201	BAbS19_I01890	identical	Helix-turn-helix, Fis-type
BAB1_0204	BAbS19_I01920	identical	Zinc-containing alcohol dehydrogenase superfamily:Zinc-containing alcohol dehydrogenase
BAB1_0206	BAbS19_I01940	identical	Bacterial regulatory protein LacI, HTH motif:Periplasmic binding protein/LacI transcriptional regulator
BAB1_0210	no match	identical	hypothetical protein
BAB1_0211	BAbS19_I01980	identical	Aldehyde dehydrogenase
BAB1_0212	BAbS19_I01990	identical	RNA-binding region RNP-1 (RNA recognition motif):Binding-protein-dependent transport systems inner membrane component
BAB1_0213	BAbS19_I02000	identical	TENA/THI-4 protein
BAB1_0215	BAbS19_I02020	identical	Thiamine monophosphate synthase
BAB1_0216	BAbS19_I02030	identical	FMN/related compound-binding core
BAB1_0217	BAbS19_I02040	identical	ThiamineS
BAB1_0218	BAbS19_I02050	identical	Mercuric reductase:Flavin-containing monooxygenase FMO:Pyridine nucleotide-disulphide oxidoreductase, class I:TrkA potassium ...
BAB1_0219	BAbS19_I02060	identical	Eukaryotic/viral aspartic protease, active site:Ribokinase:Phosphomethylpyrimidine kinase
BAB1_0220	BAbS19_I02070	identical	PAS domain:GGDEF:PAS-associated C-terminal domain:PAC motif:EAL domain
BAB1_0222	BAbS19_I02090	identical	Bacterial regulatory protein, MerR family:ATP/GTP-binding site motif A (P-loop)
BAB1_0223	BAbS19_I02100	identical	Binding-protein-dependent transport systems inner membrane component:Basic helix-loop-helix dimerization domain bHLH:Pollen a...
BAB1_0225	BAbS19_I02120	identical	Binding-protein-dependent transport systems inner membrane component
BAB1_0226	BAbS19_I02130	identical	Substrate-binding region of ABC-type glycine betaine transport system
BAB1_0227	BAbS19_I02140	identical	hypothetical protein
BAB1_0228	BAbS19_I02150	identical	ATP/GTP-binding site motif A (P-loop):TrkA potassium uptake protein:Glu/Leu/Phe/Val dehydrogenase:Glu/Leu/Phe/Val dehydrogena...
BAB1_0229	no match	identical	hypothetical protein
BAB1_0230	BAbS19_I02160	identical	Pyridine nucleotide-disulphide oxidoreductase, class-II:FAD dependent oxidoreductase:Sarcosine oxidase, beta subunit, heterot...
BAB1_0231	BAbS19_I02170	identical	Sarcosine oxidase, delta subunit, heterotetrameric
BAB1_0235	BAbS19_I02200	identical	Sarcosine oxidase, gamma subunit
BAB1_0238	BAbS19_I02230	identical	Bacterial extracellular solute-binding protein, family 1
BAB1_0239	BAbS19_I02240	identical	Binding-protein-dependent transport systems inner membrane component
BAB1_0240	BAbS19_I02250	identical	Binding-protein-dependent transport systems inner membrane component
BAB1_0241	BAbS19_I02260	identical	ATP/GTP-binding site motif A (P-loop):ABC transporter:AAA ATPase
BAB1_0242	BAbS19_I02270	identical	Mandelate racemase/muconate lactonizing enzyme
BAB1_0243	BAbS19_I02280	identical	hypothetical protein
BAB1_0244	BAbS19_I02290	identical	Oxidoreductase, N-terminal
BAB1_0245	BAbS19_I02300	identical	hypothetical protein
BAB1_0246	BAbS19_I02310	identical	Short-chain dehydrogenase/reductase SDR:Glucose/ribitol dehydrogenase
BAB1_0247	BAbS19_I02320	identical	ATP/GTP-binding site motif A (P-loop):Fumarylacetoacetate (FAA) hydrolase
BAB1_0248	BAbS19_I02330	identical	Mandelate racemase/muconate lactonizing enzyme
BAB1_0249	no match	identical	hypothetical protein
BAB1_0250	BAbS19_I02340	identical	Phage integrase
BAB1_0251	no match	identical	hypothetical protein
BAB1_0252	BAbS19_I02350	identical	hypothetical protein
BAB1_0253	no match	identical	hypothetical protein
BAB1_0254	BAbS19_I02360	identical	hypothetical protein
BAB1_0255	BAbS19_I02370	identical	virulence-associated protein E
BAB1_0258	BAbS19_I02410	identical	hypothetical protein
BAB1_0259	BAbS19_I02420	identical	hypothetical protein
BAB1_0260	BAbS19_I02430	identical	Flagellar protein FlgJ:Mannosyl-glycoprotein endo-beta-N-acetylglucosamidase
BAB1_0263	BAbS19_I02460	identical	hypothetical protein
BAB1_0264	no match	identical	hypothetical protein
BAB1_0265	no match	identical	hypothetical protein
BAB1_0266	BAbS19_I02470	identical	hypothetical protein
BAB1_0267	no match	identical	hypothetical protein
BAB1_0268	no match	identical	hypothetical protein
BAB1_0269	no match	identical	hypothetical protein
BAB1_0270	BAbS19_I02480	identical	zinc-dependent metallopeptidase
BAB1_0271	no match	identical	hypothetical protein
BAB1_0273	BAbS19_I02490	identical	hypothetical protein
BAB1_0274	BAbS19_I02500	identical	hypothetical protein
BAB1_0275	BAbS19_I02510	identical	hypothetical protein
BAB1_0276	BAbS19_I02520	identical	hypothetical protein
BAB1_0277	BAbS19_I02530	identical	hypothetical protein
BAB1_0278	no match	identical	hypothetical protein
BAB1_0279	BAbS19_I02540	identical	hypothetical protein
BAB1_0280	BAbS19_I02550	identical	Domain of unknown function DUF329
BAB1_0281	BAbS19_I02560	identical	Maf-like protein
BAB1_0283	BAbS19_I02580	identical	Low molecular weight phosphotyrosine protein phosphatase
BAB1_0284	BAbS19_I02590	identical	hypothetical protein
BAB1_0285	BAbS19_I02600	identical	Histidinol dehydrogenase
BAB1_0286	BAbS19_I02610	identical	hypothetical protein
BAB1_0287	BAbS19_I02620	identical	EPSP synthase (3-phosphoshikimate 1-carboxyvinyltransferase):UDP-N-acetylglucosamine 1-carboxyvinyltransferase
BAB1_0288	BAbS19_I02640	identical	Phage integrase:Phage integrase, N-terminal SAM-like
BAB1_0291	no match	identical	hypothetical protein
BAB1_0292	BAbS19_I02660	identical	Site-specific recombinase:Resolvase, N-terminal
BAB1_0294	no match	identical	hypothetical protein
BAB1_0295	no match	identical	hypothetical protein
BAB1_0296	BAbS19_I02680	identical	hypothetical protein
BAB1_0297	BAbS19_I02690	identical	Urease accessory protein UreD
BAB1_0298	BAbS19_I02700	identical	Urease, gamma subunit
BAB1_0299	BAbS19_I02710	identical	Urease, beta subunit
BAB1_0300	BAbS19_I02720	identical	Urease:Amidohydrolase
BAB1_0301	BAbS19_I02730	identical	UreE urease accessory, N-terminal:UreE urease accessory, C-terminal
BAB1_0302	BAbS19_I02740	identical	urease accessory protein UreF
BAB1_0303	BAbS19_I02750	identical	RecA bacterial DNA recombination protein:ATP/GTP-binding site motif A (P-loop):HypB/UreG, nucleotide-binding:Urease accessory...
BAB1_0304	BAbS19_I02760	identical	Rice seed allergenic protein RAG:ATP-binding region, ATPase-like:Histidine kinase, HAMP region:Histidine kinase A, N-terminal...
BAB1_0305	no match	identical	hypothetical protein
BAB1_0306	BAbS19_I02770	identical	transporter, putative
BAB1_0307	BAbS19_I02780	identical	Acriflavin resistance protein
BAB1_0310	BAbS19_I02810	identical	Peptidase M20/M25/M40
BAB1_0311	BAbS19_I02820	identical	Bacterial regulatory protein TetR, HTH motif
BAB1_0313	BAbS19_I02830	identical	Legume lectin, beta domain:Dihydroorotate dehydrogenase:4Fe-4S ferredoxin, iron-sulfur binding domain:FMN/related compound-bi...
BAB1_0314	BAbS19_I02840	identical	Pyridine nucleotide-disulphide oxidoreductase, class-II:NAD binding site:Adrenodoxin reductase:Pyridine nucleotide-disulphide...
BAB1_0315	BAbS19_I02850	identical	hypothetical protein
BAB1_0316	BAbS19_I02860	identical	Phosphoglucose isomerase (PGI)
BAB1_0317	BAbS19_I02870	identical	arginine/ornithine transport operon protein aot
BAB1_0318	BAbS19_I02880	identical	Eukaryotic thiol (cysteine) protease:ATPase, E1-E2 type:Blood group Rhesus C/E and D polypeptide:Haloacid dehalogenase/epoxid...
BAB1_0319	BAbS19_I02890	identical	Esterase/lipase/thioesterase, active site:ATP/GTP-binding site motif A (P-loop)
BAB1_0320	BAbS19_I02900	identical	AMP-dependent synthetase and ligase:Tetracycline resistance protein TetB
BAB1_0321	BAbS19_I02910	identical	Bacterial regulatory protein TetR, HTH motif
BAB1_0322	BAbS19_I02920	identical	Secretion protein HlyD
BAB1_0323	BAbS19_I02930	identical	Acriflavin resistance protein:Hydrophobe/amphiphile efflux-1 HAE1
BAB1_0324	BAbS19_I02940	identical	hypothetical protein
BAB1_0325	BAbS19_I02950	identical	Solute-binding protein/glutamate receptor:Bacterial extracellular solute-binding protein, family 3
BAB1_0326	BAbS19_I02960	identical	Glycosyl transferase, family 2
BAB1_0327	BAbS19_I02970	identical	Domain of unknown function DUF344
BAB1_0328	BAbS19_I02980	identical	ATP-binding region, ATPase-like:Histidine kinase A, N-terminal:Bacterial sensor protein, C-terminal:Histidine kinase
BAB1_0329	BAbS19_I02990	identical	Pollen allergen Poa pIX/Phl pVI, C-terminal
BAB1_0330	BAbS19_I03000	identical	hypothetical protein
BAB1_0331	BAbS19_I03010	identical	Acetylornithine and succinylornithine aminotransferase:Aminotransferase class-III
BAB1_0332	BAbS19_I03020	identical	Aspartate carbamoyltransferase:Ornithine carbamoyltransferase:Aspartate/ornithine carbamoyltransferase:Aspartate/ornithine ca...
BAB1_0334	BAbS19_I03040	identical	Protein of unknown function DUF525
BAB1_0335	BAbS19_I03050	identical	Cys/Met metabolism pyridoxal-phosphate-dependent enzyme:O-succinylhomoserine sulfhydrylase
BAB1_0336	BAbS19_I03060	identical	dCTP deaminase
BAB1_0337	BAbS19_I03070	identical	Helix-turn-helix, AraC type:Family of unknown function ThiJ/PfpI
BAB1_0338	BAbS19_I03080	identical	hypothetical protein
BAB1_0339	BAbS19_I03090	identical	Allergen V5/Tpx-1 related
BAB1_0340	BAbS19_I03100	identical	Sodium:dicarboxylate symporter:Multi antimicrobial extrusion protein MatE
BAB1_0341	BAbS19_I03110	identical	Dihydroorotate dehydrogenase:FMN/related compound-binding core:Dihydroorotate dehydrogenase 2
BAB1_0342	BAbS19_I03120	identical	hypothetical protein
BAB1_0343	BAbS19_I03130	identical	hypothetical protein
BAB1_0344	BAbS19_I03140	identical	Alpha/beta hydrolase fold:Esterase/lipase/thioesterase, active site:Epoxide hydrolase:Prolyl aminopeptidase S33:Alpha/beta hy...
BAB1_0345	BAbS19_I03150	identical	Bacterial regulatory protein, LuxR family:Response regulator receiver
BAB1_0346	BAbS19_I03160	identical	Na+/solute symporter:Response regulator receiver:ATP-binding region, ATPase-like:Histidine kinase A, N-terminal:Bacterial sen...
BAB1_0347	BAbS19_I03170	identical	hypothetical protein
BAB1_0348	BAbS19_I03180	identical	Large-conductance mechanosensitive channel
BAB1_0349	BAbS19_I03190	identical	Aminotransferase, class-II:Aminolevulinic acid synthase:Aminotransferase, class I and II
BAB1_0350	BAbS19_I03200	identical	Polysaccharide deacetylase
BAB1_0351	BAbS19_I03210	identical	Glycosyl transferase, family 25
BAB1_0352	BAbS19_I03220	identical	hypothetical protein
BAB1_0353	BAbS19_I03230	identical	hypothetical protein
BAB1_0354	BAbS19_I03240	identical	Bacterial regulatory protein LysR, HTH motif:LysR substrate binding domain
BAB1_0355	BAbS19_I03250	identical	LrgA family
BAB1_0356	BAbS19_I03260	identical	LrgB-like protein
BAB1_0358	BAbS19_I03270	identical	Esterase/lipase/thioesterase, active site
BAB1_0359	BAbS19_I03280	identical	Pantoate-beta-alanine ligase:Cytidyltransferase-related domain
BAB1_0360	BAbS19_I03290	identical	Ketopantoate hydroxymethyltransferase
BAB1_0361	BAbS19_I03300	identical	Phenol hydroxylase reductase:Oxidoreductase FAD/NAD(P)-binding:Flavoprotein pyridine nucleotide cytochrome reductase:NADH:cyt...
BAB1_0362	BAbS19_I03320	identical	hypothetical protein
BAB1_0363	BAbS19_I03330	identical	Orn/DAP/Arg decarboxylase, family 2:Carboxynorspermidine decarboxylase
BAB1_0364	BAbS19_I03340	identical	ATP/GTP-binding site motif A (P-loop):Saccharopine dehydrogenase
BAB1_0365	no match	identical	hypothetical protein
BAB1_0366	BAbS19_I03350	identical	ATP/GTP-binding site motif A (P-loop)
BAB1_0368	BAbS19_I03390	identical	invasion protein B
BAB1_0369	BAbS19_I03400	identical	Gliadin, alpha/beta:ATP-binding region, ATPase-like:Bacterial sensor protein, C-terminal:Histidine kinase
BAB1_0370	BAbS19_I03410	identical	Bacterial regulatory protein, LuxR family:Response regulator receiver
BAB1_0372	BAbS19_I03430	identical	Sodium:dicarboxylate symporter:Short-chain dehydrogenase/reductase SDR:Blood group Rhesus C/E and D polypeptide
BAB1_0373	BAbS19_I03440	identical	TRAP dicarboxylate transporter-DctP subunit:Twin-arginine translocation pathway signal
BAB1_0374	BAbS19_I03450	identical	hypothetical protein
BAB1_0375	BAbS19_I03460	identical	Polysaccharide deacetylase
BAB1_0376	BAbS19_I03470	identical	hypothetical protein
BAB1_0377	BAbS19_I03480	identical	Ferredoxin:Molybdopterin dehydrogenase, FAD-binding:[2Fe-2S]-binding:CO dehydrogenase flavoprotein C-terminal domain:2Fe-2S f...
BAB1_0380	BAbS19_I03510	identical	chaperone XdhC, putative
BAB1_0382	BAbS19_I03530	identical	Cytochrome c heme-binding site
BAB1_0383	BAbS19_I03540	identical	Amidohydrolase
BAB1_0384	BAbS19_I03550	identical	MOFRL
BAB1_0385	BAbS19_I03560	identical	Cytochrome oxidase maturation protein cbb3-type
BAB1_0386	BAbS19_I03570	identical	Cation-transporting ATPase A, P type:Copper-transporting ATPase:ATPase, E1-E2 type:Mercury scavenger protein:Haloacid dehalog...
BAB1_0387	BAbS19_I03580	identical	nitrogen fixation protein FixH
BAB1_0388	BAbS19_I03590	identical	4Fe-4S ferredoxin, iron-sulfur binding domain
BAB1_0389	BAbS19_I03600	identical	Cytochrome c heme-binding site:Cytochrome c, class I:Cytochrome c oxidase cbb3-type, subunit III:Cytochrome c, class IC
BAB1_0390	BAbS19_I03610	identical	cytochrome c oxidase, cbb3-type, CcoQ subunit
BAB1_0391	BAbS19_I03620	identical	Cytochrome c heme-binding site:Cytochrome C oxidase, mono-heme subunit/FixO
BAB1_0392	BAbS19_I03630	identical	Cytochrome c oxidase, subunit I:Cytochrome c oxidase cbb3-type, subunit I
BAB1_0393	BAbS19_I03640	identical	Ferric-uptake regulator
BAB1_0394	BAbS19_I03650	identical	hypothetical protein
BAB1_0395	BAbS19_I03660	identical	DSBA oxidoreductase:Twin-arginine translocation pathway signal
BAB1_0398	BAbS19_I03680	identical	Helix-turn-helix, AraC type:Methylated-DNA-[protein]-cysteine S-methyltransferase:Metal binding domain of Ada
BAB1_0399	BAbS19_I03690	identical	Conserved hypothetical protein, ArsC related:Arsenate reductase and related
BAB1_0400	BAbS19_I03700	identical	hypothetical protein
BAB1_0401	BAbS19_I03710	identical	Tetracycline resistance protein:Major facilitator superfamily (MFS)
BAB1_0402	BAbS19_I03720	identical	bacteroid development protein BacA
BAB1_0403	BAbS19_I03730	identical	Polysaccharide deacetylase
BAB1_0404	BAbS19_I03740	identical	hypothetical protein
BAB1_0405	BAbS19_I03750	identical	Uridine kinase:ATP/GTP-binding site motif A (P-loop):Ras GTPase superfamily:GTP-binding protein, HSR1-related:Small GTP-bindi...
BAB1_0406	BAbS19_I03760	identical	Heat shock protein Hsp70
BAB1_0407	BAbS19_I03770	identical	hypothetical protein
BAB1_0408	BAbS19_I03780	identical	ATP/GTP-binding site motif A (P-loop)
BAB1_0409	no match	identical	hypothetical protein
BAB1_0410	BAbS19_I03790	identical	ATP synthase KO: K02116 ATP synthase protein I
BAB1_0411	BAbS19_I03800	identical	H+-transporting two-sector ATPase, A subunit
BAB1_0412	BAbS19_I03810	identical	Eubacterial/plasma membrane H+-transporting two-sector ATPase, C subunit:H+-transporting two-sector ATPase, C subunit
BAB1_0413	BAbS19_I03820	identical	H+-transporting two-sector ATPase, B/B' subunit
BAB1_0414	BAbS19_I03830	identical	H+-transporting two-sector ATPase, B/B' subunit:ATP synthase F0, subunit B
BAB1_0415	BAbS19_I03840	identical	Ribonuclease HII/HIII
BAB1_0416	BAbS19_I03850	identical	Protein of unknown function DUF85:Elongator protein 3/MiaB/NifB:Radical SAM
BAB1_0417	BAbS19_I03860	identical	hypothetical protein
BAB1_0418	BAbS19_I03870	identical	hypothetical protein
BAB1_0419	no match	identical	hypothetical protein
BAB1_0420	BAbS19_I03880	identical	hypothetical protein
BAB1_0421	no match	identical	hypothetical protein
BAB1_0422	BAbS19_I03890	identical	hypothetical protein
BAB1_0423	BAbS19_I03890	identical	Cell division protein FtsZ:TonB-dependent receptor protein:Homoserine kinase:4-diphosphocytidyl-2C-methyl-D-erythritol kinase...
BAB1_0424	BAbS19_I03900	identical	hypothetical protein
BAB1_0425	BAbS19_I03910	identical	Clp protease:Peptidase U7:Na+/H+ antiporter NhaA
BAB1_0426	no match	identical	hypothetical protein
BAB1_0427	BAbS19_I03920	identical	SAM (and some other nucleotide) binding motif:Site-specific DNA-methyltransferase (cytosine-N4-specific):N-6 Adenine-specific...
BAB1_0428	BAbS19_I03930	identical	hypothetical protein
BAB1_0429	BAbS19_I03940	identical	Polyprenyl synthetase
BAB1_0430	BAbS19_I03950	identical	TPR repeat
BAB1_0431	BAbS19_I03960	identical	Glycyl-tRNA synthetase, alpha subunit:Heterodimeric glycyl-transfer RNA synthetase
BAB1_0432	BAbS19_I03970	identical	hypothetical protein
BAB1_0433	BAbS19_I03980	identical	Glycyl-tRNA synthetase, beta subunit:Heterodimeric glycyl-transfer RNA synthetase
BAB1_0434	BAbS19_I03990	identical	Sua5/YciO/YrdC/YwlC protein family:SUA5:SUA5/yciO/yrdC, N-terminal
BAB1_0435	BAbS19_I04000	identical	RNA-binding region RNP-1 (RNA recognition motif):FAD linked oxidase, C-terminal:FAD linked oxidase, N-terminal
BAB1_0436	BAbS19_I04010	identical	Plasmid stabilization system
BAB1_0437	BAbS19_I04020	identical	hypothetical protein
BAB1_0438	BAbS19_I04030	identical	hypothetical protein
BAB1_0439	BAbS19_I04040	identical	Enoyl-CoA hydratase/isomerase
BAB1_0440	BAbS19_I04050	identical	Acyl-CoA dehydrogenase, C-terminal:Acyl-CoA dehydrogenase, central domain
BAB1_0441	BAbS19_I04060	identical	GGDEF
BAB1_0442	BAbS19_I04070	identical	Phosphoribosylglycinamide synthetase
BAB1_0443	BAbS19_I04080	identical	UbiA prenyltransferase:4-hydroxybenzoate polyprenyl transferase, proteobacterial
BAB1_0444	BAbS19_I04090	identical	Pyridoxamine 5'-phosphate oxidase
BAB1_0445	BAbS19_I04100	identical	hypothetical protein
BAB1_0446	BAbS19_I04110	identical	Heat shock protein DnaJ, N-terminal:Chaperone DnaJ, C-terminal:Heat shock protein DnaJ
BAB1_0448	BAbS19_I04140	identical	Phosphoglycerate/bisphosphoglycerate mutase
BAB1_0449	BAbS19_I04150	identical	ATP/GTP-binding site motif A (P-loop):Cold-shock DNA-binding domain
BAB1_0451	BAbS19_I04160	identical	hypothetical protein
BAB1_0452	BAbS19_I04170	identical	Protein of unknown function DUF374
BAB1_0453	BAbS19_I04180	identical	hypothetical protein
BAB1_0454	BAbS19_I04190	identical	Chorismate synthase
BAB1_0455	BAbS19_I04200	identical	3,4-Dihydroxy-2-butanone 4-phosphate synthase:GTP cyclohydrolase II
BAB1_0456	BAbS19_I04210	identical	Histone deacetylase family
BAB1_0457	BAbS19_I04220	identical	Exonuclease VII, small subunit
BAB1_0458	BAbS19_I04230	identical	DedA family
BAB1_0459	BAbS19_I04240	identical	Transglycosylase-associated protein
BAB1_0460	BAbS19_I04250	identical	Ribosomal protein P2
BAB1_0461	BAbS19_I04260	identical	Protein of unknown function DUF209:Cupin domain
BAB1_0463	BAbS19_I04280	identical	Cell division protein FtsJ:RNA-binding S4:Hemolysin A
BAB1_0464	BAbS19_I04290	identical	SAM (and some other nucleotide) binding motif
BAB1_0465	BAbS19_I04300	identical	Conserved hypothetical protein 730
BAB1_0466	BAbS19_I04310	identical	hypothetical protein
BAB1_0467	BAbS19_I04320	identical	Peptidoglycan-binding LysM
BAB1_0468	BAbS19_I04330	identical	ABC transporter, transmembrane region:ATP/GTP-binding site motif A (P-loop):ABC transporter:AAA ATPase
BAB1_0469	BAbS19_I04340	identical	Phosphatidylserine decarboxylase-related:Phosphatidylserine decarboxylase-related protein
BAB1_0470	BAbS19_I04350	identical	CDP-alcohol phosphatidyltransferase:CDP-diacylglycerol--serine O-phosphatidyltransferase
BAB1_0471	BAbS19_I04360	identical	Short-chain dehydrogenase/reductase SDR:Glucose/ribitol dehydrogenase
BAB1_0472	BAbS19_I04370	identical	Glutamine amidotransferase, class-II:Phosphoribosyltransferase:Purine/pyrimidine phosphoribosyl transferase:Amidophosphoribos...
BAB1_0473	BAbS19_I04380	identical	Colicin V production protein
BAB1_0474	BAbS19_I04390	identical	RecA bacterial DNA recombination protein:ATP/GTP-binding site motif A (P-loop):Peptidase family S16:AAA ATPase:DNA repair pro...
BAB1_0475	BAbS19_I04400	identical	ATP/GTP-binding site motif A (P-loop):AAA ATPase:Site-specific recombinase:DnaB helicase:DnaB-like helicase, N-terminal:DnaB-...
BAB1_0476	BAbS19_I04410	identical	SAM (and some other nucleotide) binding motif:Generic methyltransferase:Cyclopropane-fatty-acyl-phospholipid synthase
BAB1_0477	BAbS19_I04420	identical	Ribosomal protein L9
BAB1_0478	BAbS19_I04430	identical	hypothetical protein
BAB1_0479	BAbS19_I04440	identical	Ribosomal protein S18
BAB1_0480	BAbS19_I04450	identical	Ribosomal protein S6
BAB1_0481	no match	identical	hypothetical protein
BAB1_0482	BAbS19_I04460	identical	Acyl transferase domain:Malonyl CoA-acyl carrier protein transacylase
BAB1_0483	BAbS19_I04470	identical	Short-chain dehydrogenase/reductase SDR:Glucose/ribitol dehydrogenase
BAB1_0484	BAbS19_I04480	identical	Acyl carrier protein (ACP):Phosphopantetheine attachment site:Phosphopantetheine-binding domain
BAB1_0485	no match	identical	hypothetical protein
BAB1_0486	BAbS19_I04490	identical	Protein kinase:Beta-ketoacyl synthase
BAB1_0487	BAbS19_I04500	identical	Protein of unknown function DUF175
BAB1_0488	BAbS19_I04510	identical	Conserved hypothetical protein 255
BAB1_0489	BAbS19_I04520	identical	Adenylate kinase:Guanylate kinase:Guanylate kinase/L-type calcium channel region
BAB1_0490	BAbS19_I04530	identical	Modulator of DNA gyrase
BAB1_0491	BAbS19_I04540	identical	hypothetical protein
BAB1_0492	BAbS19_I04550	identical	Copper center Cu(A):Cytochrome c oxidase, subunit II
BAB1_0493	BAbS19_I04560	identical	Cytochrome c oxidase, subunit I
BAB1_0497	BAbS19_I04600	identical	Cytochrome c oxidase, subunit III
BAB1_0500	BAbS19_I04630	identical	Surf1 protein
BAB1_0501	BAbS19_I04640	identical	LytB protein
BAB1_0502	BAbS19_I04650	identical	Aminoglycoside phosphotransferase:Homoserine kinase ThrB
BAB1_0503	BAbS19_I04660	identical	RNase H
BAB1_0504	BAbS19_I04670	identical	Alkyl hydroperoxide reductase/ Thiol specific antioxidant/ Mal allergen
BAB1_0505	BAbS19_I04680	identical	Ribosomal protein S7
BAB1_0506	BAbS19_I04690	identical	Protein of unknown function DUF179
BAB1_0507	BAbS19_I04700	identical	PAS domain:GGDEF:PAS-associated C-terminal domain:PAC motif:EAL domain
BAB1_0508	BAbS19_I04710	identical	GCN5-related N-acetyltransferase
BAB1_0509	BAbS19_I04720	identical	Insulinase-like peptidase, family M16:Peptidase M16 inactive
BAB1_0510	BAbS19_I04730	identical	Serine/threonine dehydratase, pyridoxal-phosphate attachment site:Pyridoxal-5'-phosphate-dependent enzyme, beta family:Threon...
BAB1_0511	BAbS19_I04750	identical	lipoprotein, putative
BAB1_0512	BAbS19_I04760	identical	EAL domain
BAB1_0513	BAbS19_I04770	identical	hypothetical protein
BAB1_0514	BAbS19_I04780	identical	Haloacid dehalogenase/epoxide hydrolase:Haloacid dehalogenase-like hydrolase:HAD-superfamily hydrolase, subfamily IA, variant...
BAB1_0515	BAbS19_I04790	identical	Cl-channel, voltage gated
BAB1_0516	BAbS19_I04800	identical	SAM (and some other nucleotide) binding motif:Site-specific DNA-methyltransferase (cytosine-N4-specific):N-6 Adenine-specific...
BAB1_0517	BAbS19_I04810	identical	Haloacid dehalogenase-like hydrolase:HAD-superfamily hydrolase, subfamily IA, variant 3
BAB1_0518	BAbS19_I04820	identical	HhH-GPD:Iron-sulfur cluster loop:Endonuclease III, FCL:A/G-specific adenine glycosylase MutY
BAB1_0519	BAbS19_I04830	identical	hypothetical protein
BAB1_0520	BAbS19_I04840	identical	hypothetical protein
BAB1_0521	BAbS19_I04850	identical	DSBA oxidoreductase:Twin-arginine translocation pathway signal
BAB1_0522	BAbS19_I04860	identical	Disease resistance protein:ATP/GTP-binding site motif A (P-loop):Peptidase family S16:SMC protein, N-terminal:Structural main...
BAB1_0524	BAbS19_I04880	identical	glyoxalase family protein
BAB1_0525	BAbS19_I04890	identical	PEP-utilizing enzyme:Pyruvate phosphate dikinase, PEP/pyruvate-binding
BAB1_0526	BAbS19_I04900	identical	Polysaccharide deacetylase
BAB1_0527	BAbS19_I04910	identical	hypothetical protein
BAB1_0528	BAbS19_I04920	identical	hypothetical protein
BAB1_0529	BAbS19_I04930	identical	Beta-lactamase-like
BAB1_0530	BAbS19_I04940	identical	BioY protein
BAB1_0531	BAbS19_I04950	identical	Ureidoglycolate hydrolase
BAB1_0532	BAbS19_I04960	identical	Transthyretin
BAB1_0533	BAbS19_I04970	identical	ribonuclease III
BAB1_0534	BAbS19_I04980	identical	Polysaccharide biosynthesis protein CapD
BAB1_0535	BAbS19_I04990	identical	Glycosyl transferase, family 4
BAB1_0536	BAbS19_I05010 # BAbS19_I05000	identical	Bacterial regulatory protein LacI, HTH motif
BAB1_0537	BAbS19_I05030	identical	INSERTION ELEMENT ISR1 HYPOTHETICAL 10 KD PROTEIN A3
BAB1_0538	no match	identical	transposase
BAB1_0539	BAbS19_I05040	identical	Integrase, catalytic domain
BAB1_0540	BAbS19_I05060	identical	Formyl transferase, N-terminal
BAB1_0541	BAbS19_I05070	identical	perosamine synthetase WbkB
BAB1_0542	BAbS19_I05080	identical	ATP/GTP-binding site motif A (P-loop):ABC transporter:AAA ATPase
BAB1_0543	BAbS19_I05090	identical	ABC transporter, family 2:Acriflavin resistance protein
BAB1_0544	BAbS19_I05100	identical	DegT/DnrJ/EryC1/StrS aminotransferase
BAB1_0545	BAbS19_I05110	identical	Short-chain dehydrogenase/reductase SDR:GDP-mannose 4,6-dehydratase
BAB1_0546	BAbS19_I05120	identical	ISBm1, transposase orfA
BAB1_0547	BAbS19_I05210	identical	transposase
BAB1_0548	BAbS19_I05130	identical	transposase
BAB1_0549	BAbS19_I05140	identical	transposase
BAB1_0550	BAbS19_I09250	identical	IS711, transposase orfA
BAB1_0552	BAbS19_I05210	identical	transposase
BAB1_0553	BAbS19_I05170	identical	Glycosyl transferase, group 1
BAB1_0554	BAbS19_I05180	identical	IS5 family element, transposase orfA
BAB1_0555	BAbS19_I05190	identical	IS5 family element, transposase orfB
BAB1_0558	BAbS19_I05210	identical	Transposase, IS4
BAB1_0559	BAbS19_I05220	identical	transposase
BAB1_0560	BAbS19_I05230	identical	Phosphoglucomutase/phosphomannomutase:Phosphogluc omutase/phosphomannomutase alpha/beta/alpha domain I:Phosphoglucomutase/phos...
BAB1_0561	BAbS19_I05240	identical	Mannose-6-phosphate isomerase, type II:Nucleotidyl transferase:Mannose-1-phosphate guanylyltransferase/mannose-6-phosphate is...
BAB1_0563	BAbS19_I05260	identical	Glycosyl transferase, group 1
BAB1_0564	no match	identical	hypothetical protein
BAB1_0565	BAbS19_I05270	identical	ATP/GTP-binding site motif A (P-loop):ABC transporter:AAA ATPase
BAB1_0566	BAbS19_I05280	identical	Tetracycline resistance protein TetB:Bacterial inner-membrane translocator
BAB1_0567	BAbS19_I05290	identical	Periplasmic binding protein/LacI transcriptional regulator
BAB1_0568	BAbS19_I05300	identical	iolE protein
BAB1_0570	BAbS19_I05320	identical	Xylose isomerase
BAB1_0571	BAbS19_I05330	identical	Carbohydrate kinase, FGGY:Xylulokinase
BAB1_0572	BAbS19_I05340	identical	Bacterial regulatory protein LacI, HTH motif:Periplasmic binding protein/LacI transcriptional regulator
BAB1_0575	no match	identical	hypothetical protein
BAB1_0576	BAbS19_I05370	identical	Aldehyde dehydrogenase
BAB1_0577	BAbS19_I05380	identical	Glucose-methanol-choline oxidoreductase:NAD binding site:GMC oxidoreductase
BAB1_0578	BAbS19_I05390	identical	Bacterial regulatory protein TetR, HTH motif
BAB1_0579	BAbS19_I05400	identical	hypothetical protein
BAB1_0580	BAbS19_I05410	identical	Prokaryotic transcription elongation factor GreA/GreB
BAB1_0581	BAbS19_I05420	identical	Death-on-curing family protein
BAB1_0582	BAbS19_I05430	identical	Transcriptional regulator AbrB:SpoVT/AbrB-like domain
BAB1_0583	BAbS19_I05440	identical	Mg2+ transporter protein, CorA-like
BAB1_0587	BAbS19_I05480	identical	hypothetical protein
BAB1_0588	BAbS19_I05490	identical	ATP/GTP-binding site motif A (P-loop)
BAB1_0589	BAbS19_I05500	identical	ErfK/YbiS/YcfS/YnhG:Twin-arginine translocation pathway signal
BAB1_0590	BAbS19_I05510	identical	Haloacid dehalogenase/epoxide hydrolase:Haloacid dehalogenase-like hydrolase:HAD-superfamily hydrolase, subfamily IA, variant 2
BAB1_0591	BAbS19_I05520	identical	Manganese and iron superoxide dismutase:ATP/GTP-binding site motif A (P-loop)
BAB1_0592	BAbS19_I05530	identical	hypothetical protein
BAB1_0593	BAbS19_I05540	identical	Esterase/lipase/thioesterase, active site:Prolyl oligopeptidase:Prolyl oligopeptidase serine protease (S9A):Prolyl endopeptid...
BAB1_0594	BAbS19_I05550	identical	transcriptional regulatory protein MucR
BAB1_0595	BAbS19_I05560	identical	hypothetical protein
BAB1_0596	BAbS19_I05570	identical	DnaA domain protein
BAB1_0597	BAbS19_I05580	identical	hypothetical protein
BAB1_0598	BAbS19_I05590	identical	Amidase:ATP/GTP-binding site motif A (P-loop)
BAB1_0599	BAbS19_I05600	identical	hypothetical protein
BAB1_0600	BAbS19_I05610	identical	hypothetical protein
BAB1_0601	BAbS19_I05620	identical	ATP-binding region, ATPase-like:Histidine kinase A, N-terminal:Bacterial sensor protein, C-terminal:Histidine kinase
BAB1_0602	BAbS19_I05630	identical	Putative peptidoglycan binding domain 1
BAB1_0603	BAbS19_I05640	identical	hypothetical protein
BAB1_0604	BAbS19_I05650	identical	hypothetical protein
BAB1_0605	BAbS19_I05660	identical	hypothetical protein
BAB1_0606	BAbS19_I05670	identical	hypothetical protein
BAB1_0607	BAbS19_I05680	identical	Glycosyl transferase, family 51:Penicillin-binding protein, transpeptidase domain
BAB1_0608	BAbS19_I05690	identical	hypothetical protein
BAB1_0609	BAbS19_I05700	identical	ATP/GTP-binding site motif A (P-loop)
BAB1_0610	BAbS19_I05710	identical	Phage portal protein, HK97 family:Phage portal protein
BAB1_0611	BAbS19_I05720	identical	hypothetical protein
BAB1_0612	BAbS19_I05730	identical	Phage prohead protease HK97
BAB1_0613	BAbS19_I05740	identical	Phage major capsid protein, HK97 family
BAB1_0614	BAbS19_I05750	identical	hypothetical protein
BAB1_0615	BAbS19_I05760	identical	Phage head-tail adaptor, putative
BAB1_0616	BAbS19_I05770	identical	hypothetical protein
BAB1_0617	BAbS19_I05780	identical	hypothetical protein
BAB1_0618	BAbS19_I05790	identical	hypothetical protein
BAB1_0619	BAbS19_I05800	identical	phage minor tail protein H
BAB1_0620	BAbS19_I05810	identical	hypothetical protein
BAB1_0623	BAbS19_I05830	identical	NLP/P60
BAB1_0626	BAbS19_I05860	identical	hypothetical protein
BAB1_0627	BAbS19_I05870	identical	hypothetical protein
BAB1_0628	BAbS19_I05880	identical	Response regulator receiver:Transcriptional regulatory protein, C terminal:Sugar transporter superfamily
BAB1_0629	BAbS19_I05890	identical	ATP-binding region, ATPase-like:Histidine kinase, HAMP region:Histidine kinase A, N-terminal:Bacterial sensor protein, C-term...
BAB1_0630	BAbS19_I05900	identical	outer membrane lipoprotein-related protein
BAB1_0631	BAbS19_I05910	identical	TPR repeat
BAB1_0632	BAbS19_I05920	identical	CcmE/CycJ proteins
BAB1_0633	BAbS19_I05930	identical	Cytochrome c assembly protein:Cytochrome c-type biogenesis protein:Cytochrome c-type biogenesis protein CcmF
BAB1_0634	BAbS19_I05940	identical	Cytochrome C biogenesis protein
BAB1_0635	BAbS19_I05950	identical	Serine protease, V8 family:Serine protease, trypsin family:PDZ/DHR/GLGF domain:HtrA/DegQ protease
BAB1_0636	BAbS19_I05960	identical	Response regulator receiver:Transcriptional regulatory protein, C terminal
BAB1_0637	BAbS19_I05970	identical	ATP-binding region, ATPase-like:Histidine kinase, HAMP region:Histidine kinase A, N-terminal:Bacterial sensor protein, C-term...
BAB1_0639	BAbS19_I05990	identical	Glycosyl transferase, family 25:O-antigen polymerase
BAB1_0640	BAbS19_I06000	identical	PAS domain:PAC motif:ATP-binding region, ATPase-like:Histidine kinase A, N-terminal:Bacterial sensor protein, C-terminal:Hist...
BAB1_0641	BAbS19_I06010	identical	Membrane alanine aminopeptidase:Neutral zinc metallopeptidase, zinc-binding region
BAB1_0642	BAbS19_I06020	identical	Protein of unknown function DUF6
BAB1_0643	BAbS19_I06030	identical	General substrate transporter:Major facilitator superfamily (MFS)
BAB1_0644	BAbS19_I06040	identical	ATP/GTP-binding site motif A (P-loop):Uracil-DNA glycosylase superfamily:Phage SPO1 DNA polymerase-related protein
BAB1_0645	BAbS19_I06050	identical	NAD binding site:ATP/GTP-binding site motif A (P-loop):Aromatic-ring hydroxylase:Electron transfer flavoprotein-ubiquinone ox...
BAB1_0646	BAbS19_I06060	identical	Endonuclease/exonuclease/phosphatase family
BAB1_0647	BAbS19_I06070	identical	Purine and other phosphorylase, family 1
BAB1_0648	BAbS19_I06080	identical	hypothetical protein
BAB1_0649	BAbS19_I06090	identical	Glutathione S-transferase, N-terminal:Glutathione S-transferase, C-terminal
BAB1_0650	BAbS19_I06100	identical	hypothetical protein
BAB1_0651	BAbS19_I06110	identical	hypothetical protein
BAB1_0652	BAbS19_I06120	identical	hypothetical protein
BAB1_0653	BAbS19_I06130	identical	Protein of unknown function DUF161
BAB1_0654	no match	identical	hypothetical protein
BAB1_0655	BAbS19_I06140	identical	Antifreeze protein, type I
BAB1_0656	BAbS19_I06150	identical	Protein of unknown function DUF423
BAB1_0657	BAbS19_I06160	identical	Aminotransferase, class-II:Aminotransferase, class I and II
BAB1_0658	BAbS19_I06170	identical	Phage integrase:Phage integrase, N-terminal SAM-like
BAB1_0659	BAbS19_I06180	identical	ATP/GTP-binding site motif A (P-loop):Porin, alpha proteobacteria type
BAB1_0661	BAbS19_I06200	identical	hypothetical protein
BAB1_0662	no match	identical	hypothetical protein
BAB1_0663	BAbS19_I06210	identical	hypothetical protein
BAB1_0664	BAbS19_I06220	identical	hypothetical protein
BAB1_0665	no match	identical	hypothetical protein
BAB1_0666	BAbS19_I06230	identical	Dihydrodipicolinate synthetase:Dihydrodipicolinate synthase subfamily
BAB1_0667	BAbS19_I06240	identical	SmpB protein
BAB1_0668	BAbS19_I06250	identical	Uracil-DNA glycosylase superfamily
BAB1_0669	BAbS19_I06260	identical	Protein of unknown function DUF88
BAB1_0670	BAbS19_I06270	identical	hypothetical protein
BAB1_0671	BAbS19_I06280	identical	RNA polymerase, omega subunit:RNA polymerase Rpb6
BAB1_0672	BAbS19_I06290	identical	Amino acid-binding ACT:Metal dependent phosphohydrolase, HD region:TGS domain:RelA/SpoT protein:Metal-dependent phosphohydrol...
BAB1_0673	BAbS19_I06300	identical	Phosphoribosyltransferase:Purine/pyrimidine phosphoribosyl transferase:Orotate phosphoribosyltransferase, Thermus type
BAB1_0674	BAbS19_I06310	identical	Cyclic nucleotide-binding domain:Bacterial regulatory protein, Crp family
BAB1_0675	BAbS19_I06320	identical	Oxygen-independent coproporphyrinogen III oxidase HemN:Elongator protein 3/MiaB/NifB:Radical SAM
BAB1_0676	BAbS19_I06330	identical	Major facilitator superfamily (MFS)
BAB1_0677	BAbS19_I06340	identical	Helix-turn-helix, AraC type
BAB1_0678	BAbS19_I06350	identical	hypothetical protein
BAB1_0679	BAbS19_I06360	identical	Holo-acyl carrier protein synthase:Phosphopantethiene-protein transferase domain
BAB1_0680	BAbS19_I06370	identical	Bacterial signal peptidase S26A:Signal peptidase
BAB1_0681	BAbS19_I06380	identical	Ribonuclease III family:Double-stranded RNA binding (DsRBD) domain
BAB1_0682	no match	identical	hypothetical protein
BAB1_0683	BAbS19_I06390	identical	Serpin:Elongation factor, GTP-binding:ATP/GTP-binding site motif A (P-loop):Type 2 KH domain:Small GTP-binding protein domain...
BAB1_0684	BAbS19_I06400	identical	Cytochrome P450:Recombination protein O, RecO
BAB1_0685	BAbS19_I06410	identical	Tyrosine specific protein phosphatase and dual specificity protein phosphatase
BAB1_0686	BAbS19_I06420	identical	hypothetical protein
BAB1_0687	BAbS19_I06430	identical	Glycine cleavage T protein (aminomethyl transferase)
BAB1_0688	BAbS19_I06440	identical	Dihydroorotase:Dihydroorotase multifunctional complex type:Amidohydrolase
BAB1_0689	BAbS19_I06450	identical	hypothetical protein
BAB1_0690	BAbS19_I06460	identical	hypothetical protein
BAB1_0691	BAbS19_I06470	identical	hypothetical protein
BAB1_0692	BAbS19_I06480	identical	NUDIX hydrolase
BAB1_0693	BAbS19_I06490	identical	Protein of unknown function DUF159
BAB1_0694	BAbS19_I06500	identical	Lysine exporter protein (LYSE/YGGA)
BAB1_0695	BAbS19_I06510	identical	hypothetical protein
BAB1_0696	BAbS19_I06520	identical	hypothetical protein
BAB1_0697	BAbS19_I06530	identical	Cysteinyl-tRNA synthetase, class Ia
BAB1_0698	no match	identical	hypothetical protein
BAB1_0699	no match	identical	2-isopropylmalate synthase
BAB1_0700	no match	identical	hypothetical protein
BAB1_0701	BAbS19_I06540	identical	HMG-CoA lyase-like:Alpha-isopropylmalate/homocitrate synthase:Aldehyde dehydrogenase:2-isopropylmalate synthase/homocitrate s...
BAB1_0702	BAbS19_I06550	identical	Protein of unknown function DUF6:RarD protein
BAB1_0703	BAbS19_I06560	identical	Peptidase M23/M37
BAB1_0704	BAbS19_I06570	identical	SAM (and some other nucleotide) binding motif:Ribosomal RNA adenine dimethylase
BAB1_0705	BAbS19_I06580	identical	Pyridoxal phosphate biosynthetic protein PdxA
BAB1_0706	BAbS19_I06590	identical	peptidyl-prolyl cis-trans isomerase, putative
BAB1_0707	BAbS19_I06600	identical	Organic solvent tolerance protein
BAB1_0708	BAbS19_I06610	identical	Predicted permease YjgP/YjgQ family
BAB1_0709	BAbS19_I06620	identical	Predicted permease YjgP/YjgQ family
BAB1_0710	BAbS19_I06630	identical	Cytosol aminopeptidase:Aromatic amino acid hydroxylase
BAB1_0711	BAbS19_I06640	identical	DNA polymerase III chi subunit, HolC
BAB1_0712	BAbS19_I06650	identical	hypothetical protein
BAB1_0713	BAbS19_I06660	identical	ATP/GTP-binding site motif A (P-loop):ABC transporter:AAA ATPase
BAB1_0714	BAbS19_I06670	identical	DinB
BAB1_0715	BAbS19_I06680	identical	Nucleoside diphosphate kinase
BAB1_0716	BAbS19_I06690	identical	Protein of unknown function DUF306
BAB1_0717	BAbS19_I06700	identical	Molybdopterin biosynthesis MoaE
BAB1_0718	BAbS19_I06710	identical	ThiamineS
BAB1_0719	BAbS19_I06720	identical	CDP-alcohol phosphatidyltransferase:NADH-ubiquinone oxidoreductase, chain 4:CDP-diacylglycerol--glycerol-3-phosphate 3-phosph...
BAB1_0720	BAbS19_I06730	identical	Excinuclease ABC, C subunit, N-terminal:Helix-hairpin-helix motif:Excinuclease ABC, C subunit, C-terminal:UvrB/UvrC protein:H...
BAB1_0722	BAbS19_I06750	identical	OmpA-like transmembrane domain
BAB1_0723	BAbS19_I06760	identical	Aminoacyl-tRNA synthetase, class I:Glutathione S-transferase, N-terminal
BAB1_0724	BAbS19_I06770	identical	Ribonuclease T2
BAB1_0725	BAbS19_I06780	identical	hypothetical protein
BAB1_0726	BAbS19_I06790	identical	N-6 Adenine-specific DNA methylase:Protein of unknown function DUF519
BAB1_0727	BAbS19_I06800	identical	Protein of unknown function DUF6
BAB1_0728	BAbS19_I06810	identical	Immunoglobulin/major histocompatibility complex:Prokaryotic molybdopterin oxidoreductase:Molybdopterin oxidoreductase:Molydop...
BAB1_0729	BAbS19_I06820	identical	hypothetical protein
BAB1_0730	BAbS19_I06830	identical	Formyl transferase, N-terminal:Phosphoribosylglycinamide formyltransferase
BAB1_0731	BAbS19_I06840	identical	AIR synthase related protein:Phosphoribosylformylglycinamidine cyclo-ligase
BAB1_0732	BAbS19_I06850	identical	hypothetical protein
BAB1_0733	BAbS19_I06860	identical	ATP/GTP-binding protein
BAB1_0734	BAbS19_I06870	identical	UDP-glucose 4-epimerase
BAB1_0735	BAbS19_I06880	identical	Proline-rich region:Proline-rich extensin
BAB1_0736	BAbS19_I06890	identical	Short-chain dehydrogenase/reductase SDR:Glucose/ribitol dehydrogenase
BAB1_0737	BAbS19_I06900	identical	hypothetical protein
BAB1_0738	BAbS19_I06920	identical	L-lactate permease
BAB1_0739	BAbS19_I06930	identical	ETC complex I subunit conserved region
BAB1_0740	BAbS19_I06940	identical	hypothetical protein
BAB1_0741	BAbS19_I06950	identical	Exonuclease
BAB1_0742	BAbS19_I06960	identical	ATP/GTP-binding site motif A (P-loop)
BAB1_0743	BAbS19_I06970	identical	GCN5-related N-acetyltransferase
BAB1_0744	BAbS19_I06980	identical	Helix-turn-helix motif
BAB1_0745	no match	identical	hypothetical protein
BAB1_0746	no match	identical	hypothetical protein
BAB1_0747	BAbS19_I06990	identical	Integrase, catalytic domain
BAB1_0751	BAbS19_I07030	identical	hypothetical protein
BAB1_0752	BAbS19_I07040	identical	Beta and gamma crystallin
BAB1_0756	BAbS19_I07080	identical	hypothetical protein
BAB1_0757	BAbS19_I07090	identical	Bacterial SH3-like region
BAB1_0758	no match	identical	hypothetical protein
BAB1_0759	BAbS19_I07100	identical	hypothetical protein
BAB1_0760	BAbS19_I07110	identical	Cys/Met metabolism pyridoxal-phosphate-dependent enzyme:Cystathionine beta-lyase, bacterial
BAB1_0761	BAbS19_I07120	identical	PA-phosphatase related phosphoesterase
BAB1_0764	no match	identical	hypothetical protein
BAB1_0767	BAbS19_I07160	identical	amino acid ABC transporter, permease protein KO: K02028 polar amino acid transport system ATP-binding proetin
BAB1_0769	BAbS19_I07180	identical	ATP/GTP-binding site motif A (P-loop):ABC transporter:AAA ATPase
BAB1_0770	BAbS19_I07190	identical	NAD binding site:Flavoprotein monooxygenase:Adrenodoxin reductase:Aromatic-ring hydroxylase
BAB1_0771	BAbS19_I07200	identical	hypothetical protein
BAB1_0772	BAbS19_I07210	identical	Polyphosphate kinase
BAB1_0775	BAbS19_I07240	identical	Aspartyl-tRNA synthetase, class IIb:GAD domain:tRNA synthetase, class II (D, K and N):OB-fold nucleic acid binding domain:Asp...
BAB1_0776	BAbS19_I07250	identical	hypothetical protein
BAB1_0777	BAbS19_I07260	identical	DNA gyrase/topoisomerase IV, subunit A:Gram negative topoisomerase IV, subunit A:DNA gyrase C-terminal repeat, beta-propeller
BAB1_0779	BAbS19_I07280	identical	hypothetical protein
BAB1_0780	BAbS19_I07290	identical	Delta-aminolevulinic acid dehydratase
BAB1_0781	BAbS19_I07300	identical	Enoyl-CoA hydratase/isomerase
BAB1_0782	BAbS19_I07310	identical	hypothetical protein
BAB1_0783	BAbS19_I07320	identical	Bacterial regulatory protein, MarR family
BAB1_0784	BAbS19_I07330	identical	hypothetical protein
BAB1_0785	BAbS19_I07340	identical	Putative peptidoglycan binding domain 1:Twin-arginine translocation pathway signal
BAB1_0786	BAbS19_I07350	identical	hypothetical protein
BAB1_0787	BAbS19_I07360	identical	Glycine hydroxymethyltransferase
BAB1_0788	BAbS19_I07370	identical	Protein of unknown function DUF193:ATP cone domain
BAB1_0789	BAbS19_I07380	identical	Cytidine/deoxycytidylate deaminase, zinc-binding region:Bacterial bifunctional deaminase-reductase, C-terminal:Riboflavin bio...
BAB1_0790	BAbS19_I07390	identical	Rhodopsin-like GPCR superfamily:Lumazine-binding protein
BAB1_0791	BAbS19_I07400	identical	6,7-dimethyl-8-ribityllumazine synthase
BAB1_0792	BAbS19_I07410	identical	Antitermination protein NusB
BAB1_0793	BAbS19_I07420	identical	Inorganic H+ pyrophosphatase
BAB1_0794	BAbS19_I07430	identical	SmpA/OmlA
BAB1_0795	BAbS19_I07440	identical	Ubiquinol-cytochrome C chaperone
BAB1_0796	BAbS19_I07450	identical	hypothetical protein
BAB1_0797	BAbS19_I07460	identical	Fatty acid synthesis plsX protein
BAB1_0798	BAbS19_I07470	identical	Naringenin-chalcone synthase:Beta-ketoacyl-acyl carrier protein synthase III (FabH)
BAB1_0799	BAbS19_I07480	identical	Histone-like bacterial DNA-binding protein:Integration host factor, alpha subunit
BAB1_0800	BAbS19_I07490	identical	Bacterial regulatory protein, MerR family
BAB1_0801	BAbS19_I07500	identical	Small multidrug resistance protein
BAB1_0802	BAbS19_I07510	identical	Bacterial sugar transferase
BAB1_0803	no match	identical	hypothetical protein
BAB1_0804	BAbS19_I07520	identical	Polysaccharide export protein
BAB1_0805	BAbS19_I07530	identical	hypothetical protein
BAB1_0806	BAbS19_I07540	identical	hypothetical protein
BAB1_0807	BAbS19_I07550	identical	Cytochrome oxidase assembly
BAB1_0808	BAbS19_I07560	identical	N-acetyl-gamma-glutamyl-phosphate reductase
BAB1_0809	BAbS19_I07570	identical	Putative agmatinase:Arginase/agmatinase/formiminoglutamase
BAB1_0810	BAbS19_I07580	identical	Ribosomal protein S9
BAB1_0811	BAbS19_I07590	identical	Ribosomal protein L13:Ribosomal protein L13, bacterial and organelle form
BAB1_0812	BAbS19_I07600	identical	Phenylacetic acid degradation-related protein:Thioesterase superfamily
BAB1_0813	BAbS19_I07610	identical	Cys/Met metabolism pyridoxal-phosphate-dependent enzyme:O-acetylhomoserine/O-acetylserine sulfhydrylase
BAB1_0816	no match	identical	hypothetical protein
BAB1_0817	no match	identical	hypothetical protein
BAB1_0818	no match	identical	hypothetical protein
BAB1_0819	BAbS19_I07630	identical	hypothetical protein
BAB1_0820	BAbS19_I07640	identical	hypothetical protein
BAB1_0821	BAbS19_I07650	identical	hypothetical protein
BAB1_0822	BAbS19_I07660	identical	NADH-ubiquinone/plastoquinone oxidoreductase, chain 3
BAB1_0823	BAbS19_I07670	identical	NADH ubiquinone oxidoreductase domain, 20 kDa subunit:NADH dehydrogenase (ubiquinone), 20 kDa subunit
BAB1_0824	BAbS19_I07680	identical	NADH dehydrogenase (ubiquinone), 30 kDa subunit
BAB1_0825	BAbS19_I07690	identical	Pectinesterase:NADH-ubiquinone oxidoreductase, chain 49kDa
BAB1_0826	BAbS19_I07700	identical	NADH dehydrogenase (ubiquinone), 24 kDa subunit
BAB1_0827	BAbS19_I07710	identical	Respiratory-chain NADH dehydrogenase, 51 kDa subunit
BAB1_0828	BAbS19_I07720	identical	Respiratory-chain NADH dehydrogenase 75 kDa subunit:Ferredoxin:Molybdopterin oxidoreductase
BAB1_0829	BAbS19_I07730	identical	Tetracycline resistance protein TetB:Respiratory-chain NADH dehydrogenase, subunit 1
BAB1_0830	BAbS19_I07740	identical	7Fe ferredoxin:3Fe-4S ferredoxin:4Fe-4S ferredoxin, iron-sulfur binding domain
BAB1_0831	BAbS19_I07750	identical	Photosynthetic reaction centre protein:NADH-ubiquinone/plastoquinone oxidoreductase, chain 6
BAB1_0832	BAbS19_I07760	identical	NADH-ubiquinone oxidoreductase, chain 4L:Mitochodrial NADH-ubiquinone oxidoreductase, chain 4L:NADH dehydrogenase (ubiquinone...
BAB1_0833	BAbS19_I07770	identical	NADH-Ubiquinone oxidoreductase (complex I), chain 5/L, N-terminal:NADH/Ubiquinone/plastoquinone (complex I):NADH-ubiquinone o...
BAB1_0834	BAbS19_I07780	identical	NADH/Ubiquinone/plastoquinone (complex I):NADH-ubiquinone oxidoreductase, chain 4
BAB1_0835	BAbS19_I07790	identical	NADH/Ubiquinone/plastoquinone (complex I):NADH-ubiquinone oxidoreductase, chain 5:NADH-ubiquinone oxidoreductase, chain 2
BAB1_0836	BAbS19_I07800	identical	Biotin protein ligase, C-terminal:Biotin/lipoate A/B protein ligase domain:Biotin--acetyl-CoA-carboxylase ligase
BAB1_0837	BAbS19_I07810	identical	Beta-lactamase-like
BAB1_0838	BAbS19_I07820	identical	Glyoxalase/Bleomycin resistance protein/dioxygenase domain
BAB1_0839	BAbS19_I07830	identical	hypothetical protein
BAB1_0840	no match	identical	hypothetical protein
BAB1_0841	no match	identical	hypothetical protein
BAB1_0842	BAbS19_I07840	identical	tRNA synthetase, class-II (G, H, P and S):Prolyl-tRNA synthetase, class IIa:Anticodon binding domain:Prolyl-tRNA synthetase,...
BAB1_0843	BAbS19_I07850	identical	Bacterial general secretion pathway protein H:Protein of unknown function DUF214
BAB1_0844	BAbS19_I07860	identical	ATP/GTP-binding site motif A (P-loop):ABC transporter:AAA ATPase
BAB1_0845	BAbS19_I07870	identical	Phosphoesterase PHP, N-terminal:PHP domain C-terminal region:OB-fold nucleic acid binding domain:DNA polymerase III alpha sub...
BAB1_0846	BAbS19_I07880	identical	hypothetical protein
BAB1_0851	BAbS19_I07930	identical	Ribosomal protein S4:RNA-binding S4:Ribosomal protein S4, bacterial and organelle form
BAB1_0852	BAbS19_I07940	identical	hypothetical protein
BAB1_0853	BAbS19_I07950	identical	Inositol phosphatase/fructose-1,6-bisphosphatase:Inositol monophosphatase
BAB1_0855	BAbS19_I07970	identical	Glutaredoxin:Glutaredoxin-related protein
BAB1_0856	BAbS19_I07980	identical	ATP/GTP-binding site motif A (P-loop):BolA-like protein
BAB1_0857	BAbS19_I07990	identical	AIR synthase related protein
BAB1_0858	BAbS19_I08000	identical	lipoprotein, putative
BAB1_0859	BAbS19_I08010	identical	Glutathione S-transferase, N-terminal:Glutathione S-transferase, C-terminal
BAB1_0860	BAbS19_I08020	identical	phosphoribosylformylglycinamidine synthase
BAB1_0861	BAbS19_I08030	identical	hypothetical protein
BAB1_0862	BAbS19_I08040	identical	SAICAR synthetase
BAB1_0863	BAbS19_I08050	identical	hypothetical protein
BAB1_0864	BAbS19_I08060	identical	HpcH/HpaI aldolase
BAB1_0865	BAbS19_I08070	identical	hypothetical protein
BAB1_0866	no match	identical	hypothetical protein
BAB1_0867	BAbS19_I08080	identical	Glyoxalase/Bleomycin resistance protein/dioxygenase domain
BAB1_0868	BAbS19_I08090	identical	Fumarate lyase:Delta crystallin:Adenylosuccinate lyase
BAB1_0869	BAbS19_I08100	identical	Ribulose-phosphate 3-epimerase
BAB1_0870	BAbS19_I08110	identical	Bacterial lipid A biosynthesis acyltransferase
BAB1_0871	BAbS19_I08120	identical	Zinc-containing alcohol dehydrogenase superfamily:Glucose/ribitol dehydrogenase
BAB1_0872	BAbS19_I08130	identical	Beta-ketoacyl synthase:ATP/GTP-binding site motif A (P-loop)
BAB1_0873	BAbS19_I08140	identical	Beta-ketoacyl synthase
BAB1_0874	BAbS19_I08150	identical	Acyl carrier protein (ACP):Phosphopantetheine attachment site:Phosphopantetheine-binding domain
BAB1_0875	BAbS19_I08160	identical	hypothetical protein
BAB1_0876	BAbS19_I08170	identical	Aldose 1-epimerase
BAB1_0878	BAbS19_I08190	identical	hypothetical protein
BAB1_0879	BAbS19_I08200	identical	Amidohydrolase
BAB1_0880	BAbS19_I08210	identical	Haloacid dehalogenase/epoxide hydrolase:Haloacid dehalogenase-like hydrolase:HAD-superfamily hydrolase, subfamily IIB:HAD-sup...
BAB1_0881	BAbS19_I08220	identical	Solute-binding protein/glutamate receptor:Ionotropic glutamate receptor:Bacterial extracellular solute-binding protein, family 3
BAB1_0882	BAbS19_I08230	identical	hypothetical protein
BAB1_0883	BAbS19_I08240	identical	Eukaryotic/viral aspartic protease, active site
BAB1_0884	BAbS19_I08250	identical	hypothetical protein
BAB1_0885	BAbS19_I08260	identical	Cobalamin-5-phosphate synthase CobS
BAB1_0886	BAbS19_I08270	identical	Nicotinate-nucleotide-dimethylbenzimidazole phosphoribosyltransferase
BAB1_0887	BAbS19_I08280	identical	Bacterial regulatory proteins, AsnC family
BAB1_0890	BAbS19_I08300	identical	hypothetical protein
BAB1_0891	BAbS19_I08310	identical	Sel1-like repeat
BAB1_0892	BAbS19_I08320	identical	AP endonuclease, family 1:Exodeoxyribonuclease III xth:Endonuclease/exonuclease/phosphatase family
BAB1_0893	BAbS19_I08330	identical	Protein of unknown function DUF533
BAB1_0894	BAbS19_I08340	identical	Protein of unknown function, HesB/YadR/YfhF
BAB1_0895	BAbS19_I08350	identical	Metal dependent phosphohydrolase, HD region:Deoxyguanosinetriphosphate triphosphohydrolase:Metal-dependent phosphohydrolase, ...
BAB1_0896	BAbS19_I08360	identical	Arginyl-tRNA synthetase, class Ic:Aminoacyl-tRNA synthetase, class I:Arginyl tRNA synthetase N-terminal domain
BAB1_0897	BAbS19_I08370	identical	Antifreeze protein, type I
BAB1_0898	BAbS19_I08380	identical	Glycoside hydrolase, family 3, N-terminal
BAB1_0899	BAbS19_I08390	identical	Protein of unknown function DUF173
BAB1_0900	BAbS19_I08400	identical	Conserved hypothetical protein 281
BAB1_0901	BAbS19_I08410	identical	Bacterial sec-independent translocation protein mttA/Hcf106:Twin-arginine translocation protein TatB:Twin-arginine translocat...
BAB1_0902	BAbS19_I08420	identical	Proline-rich region:Proline-rich extensin:Bacterial sec-independent translocation protein mttA/Hcf106:Treacher Collins syndro...
BAB1_0903	BAbS19_I08430	identical	Sec-independent periplasmic protein translocase
BAB1_0904	BAbS19_I08440	identical	tRNA synthetase, class-II (G, H, P and S):Seryl-tRNA synthetase, class IIa:Aminoacyl-transfer RNA synthetase, class II
BAB1_0905	BAbS19_I08450	identical	Survival protein SurE
BAB1_0906	BAbS19_I08460	identical	SAM (and some other nucleotide) binding motif:Rhodopsin-like GPCR superfamily:Protein-L-isoaspartate(D-aspartate) O-methyltra...
BAB1_0907	BAbS19_I08470	identical	Peptidoglycan-binding LysM:Peptidase M23/M37
BAB1_0908	BAbS19_I08480	identical	ATP/GTP-binding site motif A (P-loop)
BAB1_0909	BAbS19_I08490	identical	YajC
BAB1_0910	BAbS19_I08500	identical	Vacuolar H+-transporting two-sector ATPase, C subunit:Rhodopsin-like GPCR superfamily:Regulator of chromosome condensation, R...
BAB1_0911	BAbS19_I08510	identical	hypothetical protein
BAB1_0912	BAbS19_I08520	identical	hypothetical protein
BAB1_0913	BAbS19_I08530	identical	Pyridine nucleotide-disulphide oxidoreductase, class I:FAD-dependent pyridine nucleotide-disulphide oxidoreductase:Glucose-in...
BAB1_0914	BAbS19_I08540	identical	hypothetical protein
BAB1_0915	BAbS19_I08550	identical	hypothetical protein
BAB1_0916	BAbS19_I08560	identical	hypothetical protein
BAB1_0917	BAbS19_I08570	identical	Peptidylprolyl isomerase, FKBP-type:Protein prenyltransferase, alpha subunit:Trigger factor
BAB1_0918	BAbS19_I08580	identical	GatB/Yqey:Glutamyl-tRNA(Gln) amidotransferase B subunit:GatB N-terminal region:GatB central domain
BAB1_0919	BAbS19_I08590	identical	GCN5-related N-acetyltransferase
BAB1_0920	BAbS19_I08600	identical	NADH:ubiquinone oxidoreductase 17.2 kD subunit
BAB1_0921	BAbS19_I08610	identical	hypothetical protein
BAB1_0922	BAbS19_I08620	identical	hypothetical protein
BAB1_0923	BAbS19_I08630	identical	Leucyl/phenylalanyl-tRNA--protein transferase
BAB1_0924	BAbS19_I08640	identical	Acetyl-CoA carboxylase, biotin carboxylase:Carbamoyl-phosphate synthase L chain, ATP-binding:Carbamoyl-phosphate synthetase l...
BAB1_0925	BAbS19_I08650	identical	Biotin/lipoyl attachment:Acetyl-CoA biotin carboxyl carrier:Biotin-requiring enzyme, attachment site
BAB1_0926	BAbS19_I08660	identical	Dehydroquinase, class II
BAB1_0927	BAbS19_I08670	identical	DSBA oxidoreductase
BAB1_0929	BAbS19_I08690	identical	1-aminocyclopropane-1-carboxylate synthase:Aminotransferase, class I and II
BAB1_0930	BAbS19_I08700	identical	Ribonuclease E and G
BAB1_0931	BAbS19_I08710	identical	Cell wall hydrolase/autolysin
BAB1_0932	BAbS19_I08720	identical	Glycosyl transferase, family 51:Penicillin-binding protein, transpeptidase domain
BAB1_0933	BAbS19_I08730	identical	Class I peptide chain release factor domain:Peptide chain release factor 2:PCRF domain
BAB1_0934	BAbS19_I09250	identical	IS711, transposase orfA
BAB1_0935	BAbS19_I01270	identical	IS711, transposase orfB
BAB1_0936	BAbS19_I08750	identical	IS711, transposase orfA
BAB1_0938	BAbS19_I08770	identical	hypothetical protein
BAB1_0939	BAbS19_I08780	identical	hypothetical protein
BAB1_0940	BAbS19_I08790	identical	Protein of unknown function DUF455
BAB1_0941	BAbS19_I08800	identical	Alkyl hydroperoxide reductase/ Thiol specific antioxidant/ Mal allergen
BAB1_0942	BAbS19_I08810	identical	RNA-binding region RNP-1 (RNA recognition motif)
BAB1_0943	BAbS19_I08820	identical	Aminoacyl-tRNA synthetase, class I:Aminoacyl-tRNA synthetase, class Ib:Tyrosyl-tRNA synthetase, class Ib:RNA-binding S4
BAB1_0944	BAbS19_I08830	identical	hypothetical protein
BAB1_0945	BAbS19_I08840	identical	Small multidrug resistance protein
BAB1_0946	BAbS19_I08850	identical	Esterase/lipase/thioesterase, active site
BAB1_0947	BAbS19_I08860	identical	Aminotransferase, class V
BAB1_0948	BAbS19_I08870	identical	hypothetical protein
BAB1_0949	BAbS19_I08880	identical	ATP/GTP-binding site motif A (P-loop):ABC transporter:AAA ATPase
BAB1_0950	BAbS19_I08890	identical	hypothetical protein
BAB1_0951	BAbS19_I08900	identical	Aminotransferase, class V
BAB1_0952	BAbS19_I08910	identical	Protein of unknown function DUF59
BAB1_0953	BAbS19_I08920	identical	Glycosyl transferase, family 2
BAB1_0954	BAbS19_I08930	identical	ATP-NAD kinase
BAB1_0955	BAbS19_I08940	identical	ATP-dependent helicase, DEAD-box:DEAD/DEAH box helicase:Helicase, C-terminal:ATP/GTP-binding site motif A (P-loop)
BAB1_0956	BAbS19_I08950	identical	Protein of unknown function, HesB/YadR/YfhF
BAB1_0959	no match	identical	hypothetical protein
BAB1_0960	BAbS19_I08980	identical	Heavy metal transport/detoxification protein:Heavy metal binding
BAB1_0961	no match	identical	hypothetical protein
BAB1_0962	BAbS19_I08990	identical	SAM (and some other nucleotide) binding motif:Protein-L-isoaspartate(D-aspartate) O-methyltransferase:Site-specific DNA-methy...
BAB1_0963	BAbS19_I09000	identical	Outer membrane efflux protein
BAB1_0964	BAbS19_I09010	identical	hypothetical protein
BAB1_0965	no match	identical	hypothetical protein
BAB1_0966	BAbS19_I09020	identical	Aminoacyl-tRNA synthetase, class I:Aminoacyl-tRNA synthetase, class Ia:Valyl-tRNA synthetase, class Ia
BAB1_0967	BAbS19_I09030	identical	Membrane protein involved in aromatic hydrocarbon degradation
BAB1_0971	BAbS19_I09070	identical	Rhodopsin-like GPCR superfamily
BAB1_0972	BAbS19_I09080	identical	molybdopterin-guanine dinucleotide biosynthesis protein A
BAB1_0973	BAbS19_I09090	identical	MoaA/nifB/pqqE family:Elongator protein 3/MiaB/NifB:Radical SAM
BAB1_0974	BAbS19_I09100	identical	hypothetical protein
BAB1_0977	BAbS19_I09120	identical	Fumarate lyase:Fe-S type hydro-lyase tartrate/fumarate alpha region:Fe-S type hydro-lyase tartrate/fumarate beta region
BAB1_0980	no match	identical	hypothetical protein
BAB1_0981	BAbS19_I09150	identical	Transglycosylase-associated protein
BAB1_0982	no match	identical	hypothetical protein
BAB1_0983	BAbS19_I09160	identical	Phage integrase
BAB1_0986	BAbS19_I09180	identical	hypothetical protein
BAB1_0987	BAbS19_I09190	identical	hypothetical protein
BAB1_0991	no match	identical	hypothetical protein
BAB1_0992	no match	identical	hypothetical protein
BAB1_0993	BAbS19_I09220	identical	hypothetical protein
BAB1_0994	BAbS19_I09230	identical	hypothetical protein
BAB1_0996	BAbS19_I09250	identical	IS711, transposase orfA
BAB1_0999	BAbS19_I09300	identical	glycosyltransferase
BAB1_1000	BAbS19_I09310	identical	Glycosyl transferase, group 1
BAB1_1001	no match	identical	hypothetical protein
BAB1_1002	BAbS19_I09320	identical	secretion activator protein, putative
BAB1_1003	no match	identical	hypothetical protein
BAB1_1006	BAbS19_I09340	identical	hypothetical protein
BAB1_1007	no match	identical	hypothetical protein
BAB1_1008	BAbS19_I09350	identical	Arsenate reductase:Arsenate reductase and related
BAB1_1009	BAbS19_I09360	identical	Rare lipoprotein A
BAB1_1010	BAbS19_I09370	identical	D-alanyl-D-alanine carboxypeptidase 1, S11 family
BAB1_1011	BAbS19_I09380	identical	Thymidylate kinase:ATP/GTP-binding site motif A (P-loop)
BAB1_1012	BAbS19_I09390	identical	Replication factor C conserved domain
BAB1_1013	no match	identical	hypothetical protein
BAB1_1014	BAbS19_I09400	identical	Aminoacyl-tRNA synthetase, class I:Aminoacyl-tRNA synthetase, class Ia:Methionyl-tRNA synthetase, class Ia
BAB1_1015	BAbS19_I09410	identical	TatD-related deoxyribonuclease
BAB1_1016	BAbS19_I09420	identical	Beta-lactamase-like
BAB1_1017	BAbS19_I09430	identical	Uridine kinase:ABC transporter, transmembrane region:ATP/GTP-binding site motif A (P-loop):ABC transporter:AAA ATPase:Glucan ...
BAB1_1018	no match	identical	hypothetical protein
BAB1_1019	BAbS19_I09440	identical	RNA-binding S4:Pseudouridine synthase:Pseudouridine synthase, Rlu:Pseudouridine synthase, RluD
BAB1_1020	BAbS19_I09450	identical	Protein of unknown function DUF6
BAB1_1021	BAbS19_I09460	identical	Haloacid dehalogenase-like hydrolase:HAD-superfamily hydrolase, subfamily IA, variant 3:HAD-superfamily hydrolase, subfamily ...
BAB1_1022	BAbS19_I09470	identical	Beta tubulin
BAB1_1023	BAbS19_I09480	identical	Glutamine synthetase class-I, adenylation site:Glutamine synthetase type I:Glutamine synthetase, catalytic domain:Glutamine s...
BAB1_1024	BAbS19_I09490	identical	Nitrogen regulatory protein P-II:P-II protein urydylation site
BAB1_1025	BAbS19_I09500	identical	hypothetical protein
BAB1_1026	BAbS19_I09510	identical	hypothetical protein
BAB1_1027	BAbS19_I09520	identical	Haloacid dehalogenase/epoxide hydrolase:Haloacid dehalogenase-like hydrolase:2-phosphoglycolate phosphatase, prokaryotic:HAD-...
BAB1_1028	BAbS19_I09530	identical	hypothetical protein
BAB1_1029	BAbS19_I09550	identical	hypothetical protein
BAB1_1030	BAbS19_I09560	identical	Pyridine nucleotide-disulphide oxidoreductase, class-II:Mercuric reductase:ATP-dependent DNA ligase:Pyridine nucleotide-disul...
BAB1_1032	BAbS19_I09580	identical	Prokaryotic diacylglycerol kinase
BAB1_1033	BAbS19_I09590	identical	Nitrilase/cyanide hydratase and apolipoprotein N-acyltransferase:NAD+ synthase
BAB1_1034	BAbS19_I09600	identical	Glutamyl-tRNA synthetase, class Ic:Aminoacyl-tRNA synthetase, class I:Glutamyl-tRNA synthetase bacterial/mitochondrial
BAB1_1035	BAbS19_I09610	identical	Proline-rich extensin
BAB1_1036	BAbS19_I09620	identical	Malic oxidoreductase:Phosphate acetyl/butaryl transferase
BAB1_1037	BAbS19_I09630	identical	Mandelate racemase/muconate lactonizing enzyme
BAB1_1038	BAbS19_I09640	identical	Sulfate transporter/antisigma-factor antagonist STAS:Protein of unknown function DUF140
BAB1_1039	BAbS19_I09650	identical	ATP/GTP-binding site motif A (P-loop):ABC transporter:AAA ATPase
BAB1_1040	BAbS19_I09660	identical	hypothetical protein
BAB1_1041	BAbS19_I09670	identical	Protein of unknown function DUF330
BAB1_1042	no match	identical	hypothetical protein
BAB1_1043	BAbS19_I09680	identical	hypothetical protein
BAB1_1044	BAbS19_I09690	identical	hypothetical protein
BAB1_1045	BAbS19_I09700	identical	Cytochrome c heme-binding site:Ferredoxin:Adrenodoxin
BAB1_1048	BAbS19_I09720	identical	hypothetical protein
BAB1_1049	BAbS19_I09730	identical	Dihydropteroate synthase, DHPS:Dihydropteroate synthase
BAB1_1050	BAbS19_I09740	identical	Dihydroneopterin aldolase family:Dihydroneopterin aldolase
BAB1_1051	BAbS19_I09750	identical	7,8-Dihydro-6-hydroxymethylpterin-pyrophosphokina se, HPPK
BAB1_1052	BAbS19_I09760	identical	hypothetical protein
BAB1_1053	BAbS19_I09770	identical	Conserved hypothetical protein 1620
BAB1_1054	BAbS19_I09780	identical	ATP/GTP-binding site motif A (P-loop):YcjX-like protein
BAB1_1055	BAbS19_I09790	identical	hypothetical protein
BAB1_1056	BAbS19_I09800	identical	Zn-finger, prokaryotic DksA/TraR C4 type
BAB1_1057	no match	identical	hypothetical protein
BAB1_1058	BAbS19_I09810	identical	Proline-rich region:Proline-rich extensin
BAB1_1060	BAbS19_I09830	identical	NAD binding site:Adrenodoxin reductase:Pyridine nucleotide-disulphide oxidoreductase, class I:FAD-dependent pyridine nucleoti...
BAB1_1061	BAbS19_I09840	identical	Beta-lactamase
BAB1_1062	BAbS19_I09850	identical	Mechanosensitive (MS) ion channel
BAB1_1063	BAbS19_I09860	identical	Ribonucleotide reductase large subunit
BAB1_1064	no match	identical	Site-specific recombinase
BAB1_1065	BAbS19_I09870	identical	NUDIX hydrolase
BAB1_1066	BAbS19_I09880	identical	Phosphoribosyltransferase
BAB1_1067	BAbS19_I09880	identical	hypothetical protein
BAB1_1068	BAbS19_I09890	identical	Universal stress protein (Usp)
BAB1_1069	BAbS19_I09900	identical	Molybdenum cofactor biosynthesis protein
BAB1_1070	BAbS19_I09910	identical	Flavodoxin
BAB1_1071	BAbS19_I09920	identical	hypothetical protein
BAB1_1072	BAbS19_I09940	identical	ATP-dependent helicase, DEAD-box:DEAD/DEAH box helicase:Helicase, C-terminal:ATP/GTP-binding site motif A (P-loop)
BAB1_1073	BAbS19_I09950	identical	Cysteine synthase/cystathionine beta-synthase P-phosphate attachment site:Pyridoxal-5'-phosphate-dependent enzyme, beta family
BAB1_1074	BAbS19_I09960	identical	Alanyl-transfer RNA synthetase
BAB1_1075	BAbS19_I09970	identical	Thiosulfate sulfurtransferase:Rhodanese-like
BAB1_1076	BAbS19_I09980	identical	GCN5-related N-acetyltransferase
BAB1_1077	BAbS19_I09990	identical	Acetyl-CoA hydrolase/transferase
BAB1_1086	BAbS19_I10080	identical	Bile acid:sodium symporter
BAB1_1087	BAbS19_I10090	identical	hypothetical protein
BAB1_1088	BAbS19_I10090	identical	NAD binding site:NAD-dependent epimerase/dehydratase:UDP-glucose 4-epimerase
BAB1_1089	BAbS19_I10100	identical	ATP/GTP-binding site motif A (P-loop):MazG family protein
BAB1_1090	BAbS19_I10110	identical	nitrilotriacetate monooxygenase component B
BAB1_1091	BAbS19_I10120	identical	Nitroreductase family
BAB1_1092	BAbS19_I10130	identical	hypothetical protein
BAB1_1093	BAbS19_I10140	identical	tRNA synthetase, class-II (G, H, P and S):Prolyl-tRNA synthetase, class IIa:Threonyl-tRNA synthetase, class IIa:TGS domain:A...
BAB1_1094	BAbS19_I10150	identical	D-alanyl-D-alanine carboxypeptidase 1, S11 family
BAB1_1095	BAbS19_I10160	identical	Protein of unknown function DUF37
BAB1_1096	BAbS19_I10170	identical	Nitrogen-fixing NifU-like, N-terminal
BAB1_1097	BAbS19_I10180	identical	GTP cyclohydrolase I
BAB1_1098	BAbS19_I10190	identical	Phosphoribosyl-AMP cyclohydrolase
BAB1_1099	BAbS19_I10200	identical	Patatin
BAB1_1100	BAbS19_I10210	identical	Phage integrase
BAB1_1101	BAbS19_I10220	identical	hypothetical protein
BAB1_1102	no match	identical	hypothetical protein
BAB1_1104	BAbS19_I10240	identical	Site-specific recombinase:Resolvase, N-terminal
BAB1_1105	no match	identical	hypothetical protein
BAB1_1106	BAbS19_I10250	identical	BRO family, N-terminal
BAB1_1109	BAbS19_I10280	identical	Acyl-CoA dehydrogenase:Acyl-CoA dehydrogenase, C-terminal:Acyl-CoA dehydrogenase, central domain:Acyl-CoA dehydrogenase, N-te...
BAB1_1110	BAbS19_I10290	identical	Bacterial regulatory protein LysR, HTH motif:LysR substrate binding domain
BAB1_1111	BAbS19_I10300	identical	Bacterial luciferase
BAB1_1112	BAbS19_I10310	identical	Acriflavin resistance protein
BAB1_1113	BAbS19_I10320	identical	hypothetical protein
BAB1_1114	BAbS19_I10330	identical	Bacterial regulatory protein TetR, HTH motif
BAB1_1115	BAbS19_I10340	identical	Queuine/other tRNA-ribosyltransferase:Queuine tRNA-ribosyltransferase
BAB1_1116	BAbS19_I10350	identical	Queuosine biosynthesis protein
BAB1_1117	BAbS19_I10360	identical	ATP/GTP-binding site motif A (P-loop):Peptidyl-prolyl cis-trans isomerase, cyclophilin type
BAB1_1118	BAbS19_I10370	identical	Peptidyl-prolyl cis-trans isomerase, cyclophilin type
BAB1_1119	BAbS19_I10380	identical	Coenzyme A biosynthesis protein:Cytidylyltransferase:Cytidyltransferase-related domain
BAB1_1120	BAbS19_I10390	identical	hypothetical protein
BAB1_1121	BAbS19_I10400	identical	DNA gyrase/topoisomerase IV, subunit A:DNA gyrase, subunit A:DNA gyrase C-terminal repeat, beta-propeller
BAB1_1122	BAbS19_I10410	identical	Multiple antibiotic resistance (MarC)-related proteins
BAB1_1123	BAbS19_I10420	identical	Guanylate kinase/L-type calcium channel region
BAB1_1124	BAbS19_I10430	identical	Bacterial regulatory protein, GntR family
BAB1_1125	BAbS19_I10440	identical	hypothetical protein
BAB1_1126	BAbS19_I10450	identical	Single-strand binding protein
BAB1_1127	no match	identical	hypothetical protein
BAB1_1128	BAbS19_I10460	identical	Cytochrome c heme-binding site:ATP/GTP-binding site motif A (P-loop):ABC transporter:Excinuclease ABC, A subunit
BAB1_1129	BAbS19_I10470	identical	Histone-like bacterial DNA-binding protein
BAB1_1130	BAbS19_I10480	identical	Disease resistance protein:Chaperonin clpA/B:ATP/GTP-binding site motif A (P-loop):Peptidase family S16:ATP-dependent proteas...
BAB1_1132	BAbS19_I10510	identical	Clp protease
BAB1_1133	BAbS19_I10520	identical	ATP/GTP-binding site motif A (P-loop):GTP1/OBG
BAB1_1134	BAbS19_I10530	identical	Host factor Hfq
BAB1_1135	no match	identical	hypothetical protein
BAB1_1137	BAbS19_I10550	identical	NAD binding site:TrkA-N:TrkA potassium uptake protein:TrkA-C
BAB1_1138	BAbS19_I10560	identical	CbxX/CfqX superfamily:Chaperonin clpA/B:Response regulator receiver:Sigma-54 factor interaction domain:Helix-turn-helix, Fis-...
BAB1_1139	BAbS19_I10570	identical	PAS domain:ATP-binding region, ATPase-like:Histidine kinase, HAMP region:Histidine kinase A, N-terminal:Bacterial sensor prot...
BAB1_1140	BAbS19_I10580	identical	CbxX/CfqX superfamily:Response regulator receiver:Sigma-54 factor interaction domain:Helix-turn-helix, Fis-type:AAA ATPase
BAB1_1141	BAbS19_I10590	identical	ATP-binding region, ATPase-like:Histidine kinase A, N-terminal:Bacterial sensor protein, C-terminal:Histidine kinase
BAB1_1142	BAbS19_I10600	identical	hypothetical protein
BAB1_1143	BAbS19_I10610	identical	4-diphosphocytidyl-2C-methyl-D-erythritol synthase:YgbB
BAB1_1144	BAbS19_I10620	identical	CinA, C-terminal
BAB1_1146	BAbS19_I10640	identical	hypothetical protein
BAB1_1147	BAbS19_I10650	identical	Lipoate synthase:Elongator protein 3/MiaB/NifB:Radical SAM
BAB1_1148	BAbS19_I10660	identical	hypothetical protein
BAB1_1149	BAbS19_I10670	identical	Pyridine nucleotide-disulphide oxidoreductase, class-II:Mercuric reductase:Pyridine nucleotide-disulphide oxidoreductase, cla...
BAB1_1150	BAbS19_I10680	identical	Biotin/lipoyl attachment:Antifreeze protein, type I:Catalytic domain of components of various dehydrogenase complexes:2-oxo a...
BAB1_1152	BAbS19_I10700	identical	Dehydrogenase, E1 component:Mitochondrial substrate carrier
BAB1_1153	BAbS19_I10710	identical	Septum formation initiator
BAB1_1154	BAbS19_I10720	identical	SAM (and some other nucleotide) binding motif:Site-specific DNA-methyltransferase (cytosine-N4-specific)
BAB1_1155	BAbS19_I10730	identical	Enolase
BAB1_1156	BAbS19_I10740	identical	DAHP synthetase I/KDSA superfamily:2-dehydro-3-deoxyphosphooctonate aldolase
BAB1_1159	BAbS19_I10760	identical	ErfK/YbiS/YcfS/YnhG
BAB1_1160	BAbS19_I10770	identical	Preprotein translocase SecG subunit
BAB1_1161	BAbS19_I10780	identical	Triosephosphate isomerase
BAB1_1162	BAbS19_I10790	identical	peptidyl-prolyl cis-trans isomerase D
BAB1_1163	BAbS19_I10800	identical	Glycosyl transferase, family 3:Anthranilate phosphoribosyl transferase
BAB1_1164	BAbS19_I10810	identical	Indole-3-glycerol phosphate synthase
BAB1_1165	BAbS19_I10820	identical	Molybdopterin cofactor biosynthesis protein MoaC
BAB1_1166	BAbS19_I10830	identical	Molybdenum cofactor biosynthesis protein:MoeA N-terminal region, domain I and II:MoeA C-terminal, domain IV
BAB1_1167	BAbS19_I10840	identical	Peptidase family S24:Peptidase S24, C-terminal:LexA DNA-binding region
BAB1_1168	BAbS19_I10850	identical	ComEC/Rec2-related protein
BAB1_1169	BAbS19_I10870	identical	Glutamyl-tRNA synthetase, class Ic:Arginyl-tRNA synthetase, class Ic:Aminoacyl-tRNA synthetase, class I:Glutamyl-tRNA synthe...
BAB1_1170	BAbS19_I10880	identical	Citrate synthase
BAB1_1171	BAbS19_I10890	identical	Glycosyl transferase, family 19
BAB1_1172	BAbS19_I10900	identical	hypothetical protein
BAB1_1173	BAbS19_I10910	identical	Bacterial transferase hexapeptide repeat
BAB1_1174	BAbS19_I10920	identical	Thioesterase superfamily
BAB1_1175	BAbS19_I10930	identical	Bacterial transferase hexapeptide repeat:UDP-3-O-[3-hydroxymyristoyl] glucosamine N-acyltransferase, LpxD
BAB1_1176	BAbS19_I10940	identical	Bacterial surface antigen (D15)
BAB1_1177	no match	identical	hypothetical protein
BAB1_1178	BAbS19_I10950	identical	Mammalian sterol-regulatory element binding protein (SREBP) site 2 protease:PDZ/DHR/GLGF domain:Zinc metalloprotease (putativ...
BAB1_1179	BAbS19_I10960	identical	Phosphatidate cytidylyltransferase:Homoserine kinase
BAB1_1180	BAbS19_I10970	identical	RNA-binding region RNP-1 (RNA recognition motif):Di-trans-poly-cis-decaprenylcistransferase
BAB1_1181	BAbS19_I10980	identical	Ribosome recycling factor
BAB1_1182	BAbS19_I10990 # BAbS19_I11000	identical	Aspartate/glutamate/uridylate kinase:Glutamate 5-kinase
BAB1_1183	BAbS19_I11000	identical	Ubiquitin-associated domain:Elongation factor Ts
BAB1_1184	BAbS19_I11010	identical	Ribosomal protein S2:Ribosomal protein S2, bacterial and organelle form
BAB1_1186	BAbS19_I11030	identical	ATP/GTP-binding site motif A (P-loop)
BAB1_1187	BAbS19_I11040	identical	Endoribonuclease L-PSP
BAB1_1189	BAbS19_I11070	identical	Protein of unknown function DUF482
BAB1_1190	BAbS19_I11080	identical	Histidine triad (HIT) protein
BAB1_1191	BAbS19_I11090	identical	Chaperonin clpA/B:ATP/GTP-binding site motif A (P-loop):AAA ATPase:AAA ATPase, central region:Clp, N terminal
BAB1_1192	BAbS19_I11100	identical	Protein of unknown function DUF174
BAB1_1193	BAbS19_I11110	identical	D-alanyl-D-alanine carboxypeptidase 1, S11 family
BAB1_1194	BAbS19_I11120	identical	hypothetical protein
BAB1_1195	BAbS19_I11130	identical	hypothetical protein
BAB1_1198	BAbS19_I11150	identical	hypothetical protein
BAB1_1199	BAbS19_I11160	identical	Protein of unknown function DUF218
[truncated: 1,903 more rows]
